# Supplementary material for: Investigating the functional implications of reinforcing feedback loops in transcriptional regulatory networks
Source: Royal Society of Chemistry journal article supplement (doi:10.1039/c4mb00526k), 2014-09-17
Supplement: c4mb00526k2.xlsx [file c4mb00526k2.xlsx]

## Sheet: TabS1_mirfamily_TF_regulation.t
Family_AC	Num_of_miRNAs	Num_of_TFs	Mean_of_Random	p_Value
MIPF0000317	2	1	13.449	0.012987
MIPF0000342	2	1	14.275	0.011988
MIPF0001037	2	4	12.877	0.490509
MIPF0000200	2	1	12.804	0.00999001
MIPF0000202	2	4	38.978	0.000999001
MIPF0000231	2	2	12.803	0.233766
MIPF0000213	2	1	13.886	0.015984
MIPF0000115	2	1	13.601	0.020979
MIPF0000133	2	1	19.363	0.000999001
MIPF0000162	2	5	31.898	0.016983
MIPF0000924	2	1	12.912	0.020979
MIPF0000157	2	12	12.803	0.729271
MIPF0000596	2	2	11.942	0.240759
MIPF0000193	2	2	29.115	0.000999001
MIPF0000194	2	1	39.169	0.000999001
MIPF0000196	2	1	22.759	0.000999001
MIPF0000197	2	3	13.017	0.370629
MIPF0000180	2	5	14.088	0.53047
MIPF0000001	10	34	13.327	0.836164
MIPF0000011	4	34	12.492	0.842158
MIPF0000005	2	3	13.202	0.392607
MIPF0000002	9	5	20.277	0.306693
MIPF0000009	2	1	12.183	0.012987
MIPF0000006	2	2	19.565	0.024975
MIPF0000021	2	3	12.921	0.373626
MIPF0000022	2	2	12.991	0.230769
MIPF0000019	2	1	13.442	0.018981
MIPF0000013	6	36	13.529	0.925075
MIPF0000014	2	5	46.058	0.000999001
MIPF0000034	5	38	13.63	0.954046
MIPF0000033	8	3	13.837	0.378621
MIPF0000031	4	3	13.617	0.361638
MIPF0000028	3	3	13.414	0.386613
MIPF0000027	2	1	13.467	0.00999001
MIPF0000444	2	1	13.844	0.01998
MIPF0000041	2	1	12.988	0.013986
MIPF0000040	2	1	12.969	0.017982
MIPF0000043	2	4	13.987	0.488511
MIPF0000044	2	1	12.422	0.021978
MIPF0000036	2	1	14.106	0.014985
MIPF0000055	2	1	13.652	0.00999001
MIPF0000054	2	3	13.201	0.3996
MIPF0000053	2	2	12.717	0.240759
MIPF0000440	2	1	24.664	0.000999001
MIPF0000462	2	100	12.923	1
MIPF0000496	2	1	13.128	0.011988
MIPF0000071	8	7	12.742	0.694306
MIPF0000073	3	3	13.835	0.368631
MIPF0000063	2	1	12.338	0.016983
MIPF0000060	2	26	13.623	0.758242
MIPF0000065	3	2	23.421	0.002997
MIPF0000097	2	1	12.556	0.012987
MIPF0000093	2	3	13.677	0.368631
MIPF0000091	2	1	42.145	0.000999001
MIPF0000079	2	3	13.577	0.358641
MIPF0000084	2	26	12.55	0.781219
MIPF0000082	4	2	12.614	0.243756
