# Supplementary material for: Investigating the functional implications of reinforcing feedback loops in transcriptional regulatory networks
Source: Royal Society of Chemistry journal article supplement (doi:10.1039/c4mb00526k), 2014-09-17
Supplement: c4mb00526k3.xlsx [file c4mb00526k3.xlsx]

## Sheet: motif_analysis.txt
Subgraph_Label	occupancy	mean_frequency	standard_deviation	ZScore	pval_enrich	pval_deplet	frequency_in_real_network
0010000101001000_0011	1.89997e-06	36.892	14.5722	-1.63956	0.983017	0.016983	13
0100001000011000_0111	2.10458e-05	175.35	24.8499	-1.26157	0.894106	0.105894	144
0011001010000100_0011	4.5307e-06	17.803	9.11632	1.44762	0.104895	0.895105	31
0000000011001001_0011	0.00326693	29145.5	693.601	-9.79304	1	0	22353
0000000011101011_0011	0.00233609	21309.6	567.613	-9.38246	1	0	15984
0000000011011001_0011	0.00115591	10203.8	276.898	-8.28756	1	0	7909
0000000011001000_0011	0.00416386	36762	1002.21	-8.25375	1	0	28490
0000000011101000_0011	0.00392212	33263.7	789.209	-8.14443	1	0	26836
0000111001001001_0111	0.000156821	1859.72	103.006	-7.63756	1	0	1073
0000000011111000_0011	0.00255385	21407.5	519.881	-7.56612	1	0	17474
0000000011101001_0011	0.00241574	21928.8	715.368	-7.54826	1	0	16529
0000000011101010_0011	0.00138216	11843.7	319.787	-7.46346	1	0	9457
0000000011011010_0011	0.000148198	1675.63	95.9531	-6.89539	1	0	1014
0000111000101001_0111	0.000514892	5171.85	242.946	-6.78689	1	0	3523
0000111001101001_0111	0.000357341	3610.32	173.136	-6.73065	1	0	2445
0000110010100100_0111	0.00036801	3693.41	186.748	-6.29411	1	0	2518
0000000011011000_0011	0.000969862	8379.2	277.169	-6.2893	1	0	6636
0000111000001001_0111	0.000589429	5720.71	272.872	-6.185	1	0	4033
0000000011001010_0011	0.00106603	9154.55	301.484	-6.17132	1	0	7294
0000000011111001_0011	0.00253792	20459.3	509.069	-6.07831	1	0	17365
0000000011011011_0011	0.00119698	10126.2	322.562	-6.00257	1	0	8190
0000111000101011_0111	0.000161936	1716.15	104.364	-5.8272	1	0	1108
0010000001100101_0011	0.00212461	19497.7	878.512	-5.64674	1	0	14537
0000000011001011_0011	0.002833	22763.7	632.172	-5.3462	1	0	19384
0000111001101011_0111	0.000164713	1526	80.211	-4.97441	1	0	1127
0000110010010001_0111	0.000457162	3983.49	172.521	-4.95876	1	0	3128
0000101001100110_0111	0.000359094	2803.86	71.0322	-4.88313	1	0	2457
0000000011111011_0011	0.00365321	28805.9	811.644	-4.69411	1	0	24996
0000111000100101_0111	0.000610329	4654.4	107.848	-4.43585	1	0	4176
0000110010010011_0111	0.000179766	1597.64	83.6634	-4.39427	1	0	1230
0000000011111010_0011	0.00120867	9430.66	266.075	-4.36216	1	0	8270
0000110010100101_0111	0.000461401	4094.04	215.617	-4.34586	1	0	3157
0000111000011001_0111	0.000118237	1051.45	57.0386	-4.25063	0.999001	0.000999001	809
0000101001100011_0111	0.000388617	2972.24	74.8808	-4.18313	1	0	2659
0000111000110110_0111	0.000313349	2365.58	52.9989	-4.18077	1	0	2144
0000111001100101_0111	0.000380871	2916.7	75.3279	-4.12458	1	0	2606
0000101000010100_0111	2.38227e-05	209.108	11.3112	-4.07633	1	0	163
0000111001001011_0111	5.50991e-05	503.97	32.7552	-3.87633	1	0	377
0000111001001100_0111	0.000154628	1325.24	69.562	-3.84179	1	0	1058
0000101001100100_0111	0.000239689	1844.77	53.8984	-3.79913	1	0	1640
0000101011000101_0111	1.34459e-05	169.237	20.3478	-3.79583	1	0	92
0000111001111001_0111	0.000361433	3064.31	157.051	-3.7651	1	0	2473
0010000000001110_0011	0.000116337	1636.73	224.577	-3.74362	1	0	796
0000101001100101_0111	0.000116483	935.163	37.0523	-3.72887	1	0	797
0000100001100100_0111	0.000768465	5824.03	152.036	-3.72301	1	0	5258
0000100001100101_0111	0.00026015	1996.21	58.971	-3.66641	1	0	1780
0000110010100111_0111	0.00027725	2432.72	149.007	-3.59525	1	0	1897
0000101000000101_0111	0.000398117	3015.65	81.7514	-3.56755	1	0	2724
0000110010100110_0111	0.000161644	1371.35	74.8093	-3.54706	0.999001	0.000999001	1106
0010000001100110_0011	0.00141869	11216.8	427.597	-3.53092	1	0	9707
0000110010101001_0111	0.000191459	1704.63	112.945	-3.49398	0.999001	0.000999001	1310
0000101000010010_0111	0.000100991	799.047	31.4371	-3.43692	0.999001	0.000999001	691
0000100001010100_0111	0.000396363	2973.29	76.5329	-3.41414	1	0	2712
0000101111000000_0111	3.91686e-05	416.944	43.7088	-3.40764	1	0	268
0000101001100010_0111	0.000419163	3143.72	80.9338	-3.4068	1	0	2868
0000101111000011_0111	9.20755e-06	109.153	13.6668	-3.37703	1	0	63
0010000001111101_0011	9.80677e-05	1105.86	130.276	-3.33799	1	0	671
0010000001001111_0011	7.01528e-05	858.494	113.441	-3.33649	1	0	480
0000111011101101_0111	0.000248312	1999.06	90.5825	-3.31255	1	0	1699
0000101111000110_0111	6.72297e-06	69.216	7.15322	-3.24553	1	0	46
0100000011000110_0111	1.11075e-05	165.987	27.7778	-3.23953	1	0	76
0011000001110101_0011	0.000259711	2295.27	160.029	-3.23859	0.999001	0.000999001	1777
0000111000001011_0111	0.000109614	928.478	55.2034	-3.2331	1	0	750
0000111010101001_0111	0.000719066	5852.14	289.252	-3.22257	0.996004	0.003996	4920
0000111000011100_0111	2.3092e-05	205.525	14.7626	-3.21928	1	0	158
0100001001001100_0111	1.31536e-06	32.702	7.36556	-3.21795	1	0	9
0000101001110111_0111	0.00117111	8691.85	211.185	-3.21449	1	0	8013
0100001000011110_0111	8.7691e-07	23.968	5.59198	-3.21317	0.999001	0.000999001	6
0000110011000010_0111	9.42678e-05	777.665	41.3322	-3.20973	1	0	645
0010000001001110_0011	2.48458e-05	369.565	62.7334	-3.18116	1	0	170
0100000011000010_0111	1.38844e-05	195.282	31.8337	-3.15018	1	0	95
0100001000101110_0111	1.70997e-05	256.167	44.3125	-3.14058	1	0	117
0010000001111111_0011	0.000159744	1648.38	178.224	-3.11621	1	0	1093
0000110010101000_0111	0.00132457	10197.1	365.286	-3.1048	0.998002	0.001998	9063
0000111010001001_0111	0.000964016	7300.61	228.245	-3.08709	0.997003	0.002997	6596
0010000001100111_0011	0.00268495	20775.1	784.578	-3.06421	0.998002	0.001998	18371
0100000011010010_0111	5.99222e-06	101.252	19.8021	-3.04271	1	0	41
0100011000010110_0111	0.000109175	798.94	17.117	-3.03441	0.997003	0.002997	747
0011001000000001_0011	0.00136739	10822.1	486.211	-3.01528	0.998002	0.001998	9356
0011001000100011_0011	0.00134723	10488	422.474	-3.00603	0.999001	0.000999001	9218
0100001000011111_0111	5.40761e-06	73.545	12.1638	-3.00441	1	0	37
0000101000000110_0111	0.000409224	3001.07	67.1374	-2.99493	0.998002	0.001998	2800
0100001000111101_0111	5.26146e-06	77.343	13.9242	-2.96915	1	0	36
0000101001110011_0111	0.000740112	5430.66	124.291	-2.95005	1	0	5064
0110010100001110_0111	7.30758e-07	36.666	10.7505	-2.94553	1	0	5
0000101001100111_0111	0.0005089	3767.96	97.1113	-2.94466	0.999001	0.000999001	3482
0000110010010100_0111	0.000108298	870.161	43.9741	-2.93721	1	0	741
0100001001111110_0111	7.16143e-06	128.165	27.0688	-2.92458	0.999001	0.000999001	49
0100001010000110_0111	9.79216e-06	132.617	22.4982	-2.91655	0.999001	0.000999001	67
0100001000110010_0111	0.000646575	4696.78	93.5871	-2.91468	0.998002	0.001998	4424
0000101101110111_0111	0.000517377	3966.24	146.281	-2.9138	1	0	3540
0011000001100101_0011	0.000117214	1131.19	113.212	-2.9077	0.999001	0.000999001	802
0110010100001010_0111	1.31536e-06	33.388	8.39511	-2.90502	1	0	9
0000101001000010_0111	6.51836e-05	503.81	19.9277	-2.90098	0.996004	0.003996	446
0110011100100011_0111	0.000277542	2204.85	105.772	-2.89157	0.998002	0.001998	1899
0010000001001100_0011	0.000141767	1505.42	185.879	-2.88048	1	0	970
0000111000110101_0111	0.000239981	1769.86	44.5422	-2.87056	0.998002	0.001998	1642
0000101111000001_0111	3.82917e-05	364.03	35.6204	-2.86437	0.999001	0.000999001	262
0100011000010010_0111	6.51836e-05	487.813	14.6338	-2.85729	0.995005	0.004995	446
0100001000011101_0111	3.50764e-06	51.423	9.67738	-2.83372	1	0	24
0000100001100110_0111	0.00116278	8383.68	151.859	-2.81627	0.996004	0.003996	7956
0000111000100100_0111	0.000807488	5871.79	123.481	-2.80845	0.999001	0.000999001	5525
0110011000001010_0111	1.46152e-06	40.91	11.0179	-2.80544	1	0	10
0000111011011011_0111	3.25918e-05	272.313	17.5954	-2.80261	0.996004	0.003996	223
0000101000000100_0111	0.000392417	2921.18	84.7882	-2.78549	0.999001	0.000999001	2685
0100001000111110_0111	4.5307e-06	75.423	15.9644	-2.78262	0.999001	0.000999001	31
0100000011000111_0111	3.02534e-05	361.375	55.737	-2.7697	1	0	207
0110000000001100_0111	6.28452e-06	126.803	30.4336	-2.75363	0.999001	0.000999001	43
0100001000100010_0111	0.00195098	14091.5	270.726	-2.74248	0.997003	0.002997	13349
0000111101100001_0111	0.00111879	8200.31	200.492	-2.71987	0.998002	0.001998	7655
0110010100010001_0111	0.000269065	2114.01	100.512	-2.71615	0.998002	0.001998	1841
0000111001001110_0111	7.35142e-05	610.185	39.4646	-2.71598	1	0	503
0111011101000001_0111	1.97305e-05	196.987	22.8419	-2.71374	0.999001	0.000999001	135
0000111010010101_0111	5.203e-05	415.983	22.1743	-2.70507	0.998002	0.001998	356
0000100001110101_0111	0.00186431	13535.8	288.312	-2.7046	0.996004	0.003996	12756
0000111110110010_0111	0.000164128	1333.18	77.9232	-2.69728	0.997003	0.002997	1123
0000101001110100_0111	0.000200228	1519.13	55.451	-2.68936	0.998002	0.001998	1370
0010000001100100_0011	0.00437183	32710.1	1040.11	-2.68923	0.996004	0.003996	29913
0010000001101100_0011	0.000189412	1797.75	187.075	-2.68209	0.998002	0.001998	1296
0000111001111011_0111	0.000107421	895.246	60.3025	-2.65737	0.998002	0.001998	735
0000101001110000_0111	0.0015343	11127.5	237.91	-2.64591	0.998002	0.001998	10498
0000110010010000_0111	0.00055713	4282.05	177.711	-2.64499	0.995005	0.004995	3812
0000111001101100_0111	0.000216743	1711.16	86.3804	-2.64138	0.994006	0.00599401	1483
0100000011101001_0111	1.16921e-05	235.986	59.1129	-2.63878	1	0	80
0000110010011010_0111	4.61839e-05	381.615	24.8766	-2.63762	0.995005	0.004995	316
0000110010000011_0111	0.000673613	5173.79	214.67	-2.63096	0.99001	0.00999001	4609
0000101111010101_0111	1.75382e-05	175.895	21.2764	-2.62709	0.998002	0.001998	120
0000101001110010_0111	0.000470024	3445.11	87.4008	-2.62137	0.995005	0.004995	3216
0110011100001000_0111	1.56382e-05	216.656	42.0887	-2.60535	0.998002	0.001998	107
0000101000100110_0111	0.000682966	4899.01	86.8305	-2.60289	0.996004	0.003996	4673
0000101111000010_0111	6.43067e-06	65.393	8.2212	-2.60217	0.996004	0.003996	44
0100001010101110_0111	1.16921e-06	51.006	16.5902	-2.59226	1	0	8
0100000010000100_0111	9.86523e-05	945.781	104.925	-2.58071	0.997003	0.002997	675
0000111001011001_0111	0.000188828	1486.24	75.2993	-2.57961	0.99001	0.00999001	1292
0010000001010110_0011	0.000139282	1246.41	114.351	-2.56592	0.995005	0.004995	953
0000100001010001_0111	0.00215866	15414.1	251.85	-2.55759	0.995005	0.004995	14770
0000111001000110_0111	0.000294203	2140.12	50.5074	-2.51688	0.996004	0.003996	2013
0010001000001010_0011	9.70447e-05	1087.1	168.319	-2.51367	0.996004	0.003996	664
0000101111000101_0111	1.98766e-05	184.2	19.213	-2.50872	0.999001	0.000999001	136
0100001001101110_0111	7.89219e-06	107.112	21.1775	-2.50795	0.998002	0.001998	54
0110010000001010_0111	8.03834e-06	115.234	24.0399	-2.50558	0.999001	0.000999001	55
0100011111110110_0111	8.21372e-05	756.587	77.7745	-2.50194	0.995005	0.004995	562
0100011111110111_0111	0.000338926	2987.09	267.225	-2.5001	0.99001	0.00999001	2319
0100001001010000_0111	0.000374002	2729.9	68.3577	-2.5001	0.988012	0.011988	2559
0000101001110001_0111	0.00108021	7786.51	158.212	-2.49986	0.996004	0.003996	7391
0000111110111011_0111	0.000326064	2540.59	124.521	-2.48625	0.992008	0.00799201	2231
0100001000001110_0111	8.18449e-06	111.984	22.5796	-2.4794	0.998002	0.001998	56
0100000011010000_0111	5.55376e-05	648.671	109.02	-2.46441	0.997003	0.002997	380
0100000011110010_0111	6.47452e-05	647.183	82.9226	-2.46233	1	0	443
0110011101111111_0111	1.65151e-05	215.081	41.4643	-2.4619	0.998002	0.001998	113
0100001000111111_0111	3.14226e-05	319.324	42.3848	-2.46136	0.996004	0.003996	215
0110010100001111_0111	1.81228e-05	213.126	36.2176	-2.46085	1	0	124
0110011101101111_0111	1.24229e-05	155.189	28.6969	-2.44587	0.996004	0.003996	85
0100000010000111_0111	0.000225804	2098.99	226.673	-2.44402	0.992008	0.00799201	1545
0100001000101111_0111	6.47452e-05	632.532	77.6706	-2.4402	0.997003	0.002997	443
0011000001100100_0011	0.00033951	2718	162.359	-2.43286	0.99001	0.00999001	2323
0000111101010001_0111	0.00149323	10709.8	202.582	-2.4324	0.991009	0.00899101	10217
0000111000111001_0111	0.000242319	1879.56	91.3659	-2.42493	0.99001	0.00999001	1658
0110011101001110_0111	1.46152e-07	14.416	5.53386	-2.42435	1	0	1
0000111000100111_0111	0.00221171	15828.8	287.651	-2.41891	0.99001	0.00999001	15133
0100000011000101_0111	2.10458e-05	252.822	44.9915	-2.41872	0.997003	0.002997	144
0000111110011010_0111	3.0838e-05	255.994	18.642	-2.41358	0.987013	0.012987	211
0000100001100011_0111	0.00120926	8733.07	191.06	-2.40275	0.992008	0.00799201	8274
0000101001010010_0111	5.84606e-05	446.419	19.3551	-2.39828	0.983017	0.016983	400
0000111011101001_0111	0.000305311	2376.83	120.169	-2.39519	0.985015	0.014985	2089
0100000010000010_0111	0.000140306	1272.75	130.829	-2.39051	0.994006	0.00599401	960
0100001010000111_0111	3.15687e-05	343.728	53.5746	-2.38411	0.995005	0.004995	216
0011001001100101_0011	8.18449e-06	151.884	40.2926	-2.37969	0.997003	0.002997	56
0100010001100110_0111	0.00110564	7885.22	135.306	-2.36661	0.989011	0.010989	7565
0000111001011011_0111	3.82917e-05	312.481	21.3465	-2.36484	0.99001	0.00999001	262
0000100001010000_0111	0.00217693	15481.8	248.443	-2.36176	0.99001	0.00999001	14895
0100001000011100_0111	5.84606e-07	15.486	4.86533	-2.36078	1	0	4
0110011101101100_0111	3.94609e-06	58.697	13.4352	-2.35924	0.997003	0.002997	27
0100001001010111_0111	0.000127298	955.159	35.7907	-2.35142	0.984016	0.015984	871
0100010001000100_0111	0.000695682	5029.24	114.604	-2.34931	0.989011	0.010989	4760
0110010100001100_0111	6.86912e-06	92.565	19.4204	-2.34624	1	0	47
0100001010001110_0111	4.38455e-07	28.638	10.9488	-2.34162	1	0	3
0000110010010110_0111	7.95065e-05	610.973	28.6334	-2.33898	0.989011	0.010989	544
0100000011001001_0111	1.19844e-05	208.427	54.0684	-2.33828	0.998002	0.001998	82
0110011100100000_0111	0.000668936	5121.64	234.169	-2.32585	0.995005	0.004995	4577
0100001001000011_0111	7.62911e-05	562.77	17.7101	-2.30208	0.987013	0.012987	522
0010001000001110_0011	2.77688e-06	67.387	21.0842	-2.29495	0.999001	0.000999001	19
0000111101100100_0111	0.00056853	4140.45	109.371	-2.28992	0.992008	0.00799201	3890
0100010001100100_0111	0.00103241	7386.93	141.107	-2.28853	0.99001	0.00999001	7064
0000101000100100_0111	0.000261904	1919.18	55.663	-2.28486	0.987013	0.012987	1792
0000111000001100_0111	0.000309403	2359.52	106.164	-2.28436	0.993007	0.00699301	2117
0110011001001010_0111	4.38455e-07	15.132	5.32023	-2.28035	1	0	3
0100001001001110_0111	5.84606e-07	19.47	6.78448	-2.28021	0.999001	0.000999001	4
0011001000010000_0011	0.000466954	3772.02	253.899	-2.27263	0.993007	0.00699301	3195
0100000010101001_0111	2.03151e-05	334.054	86.0769	-2.26604	0.999001	0.000999001	139
0100001011110111_0111	3.96071e-05	425.219	68.093	-2.26483	0.991009	0.00899101	271
0100001001111111_0111	4.63301e-05	457.671	62.2151	-2.26104	0.991009	0.00899101	317
0100010001110101_0111	0.00150916	10790.1	205.288	-2.26065	0.992008	0.00799201	10326
0110011001101100_0111	4.2384e-06	66.339	16.5244	-2.25963	0.998002	0.001998	29
0100000011010110_0111	5.55376e-06	68.29	13.4053	-2.25956	0.995005	0.004995	38
0100001010101001_0111	1.05229e-05	191.695	52.99	-2.25882	1	0	72
0000101001110110_0111	0.00040674	2958.83	77.9427	-2.25585	0.991009	0.00899101	2783
0000101101100001_0111	0.000316564	2394.64	101.505	-2.25249	0.989011	0.010989	2166
0110011101101010_0111	2.19227e-06	38.473	10.4344	-2.24958	0.999001	0.000999001	15
0100000011100110_0111	3.20072e-05	324.717	47.0026	-2.24917	0.993007	0.00699301	219
0100001011111110_0111	1.16921e-06	43.126	15.6279	-2.24764	1	0	8
0000110010010101_0111	0.000225512	1714.11	76.135	-2.2474	0.991009	0.00899101	1543
0110011001101000_0111	1.22767e-05	155.553	31.9036	-2.24279	0.997003	0.002997	84
0100001001011001_0111	5.84606e-06	70.087	13.4513	-2.23673	0.992008	0.00799201	40
0010000001001101_0011	0.000137675	1298.46	159.848	-2.23002	0.992008	0.00799201	942
0000110010000010_0111	0.000609598	4529.75	160.874	-2.23002	0.986014	0.013986	4171
0011001000100000_0011	0.00181666	13527.9	493.827	-2.22329	0.988012	0.011988	12430
0100001000011011_0111	4.38455e-06	53.689	10.6856	-2.2169	0.996004	0.003996	30
0100000011010111_0111	3.14226e-05	361.451	66.2159	-2.21172	0.994006	0.00599401	215
0100001001011110_0111	4.38455e-07	12.399	4.25181	-2.21059	1	0	3
0100011000110011_0111	0.000554061	4025.66	106.19	-2.20984	0.985015	0.014985	3791
0000111000000110_0111	0.000867117	6167.97	106.581	-2.20466	0.984016	0.015984	5933
0100001011101100_0111	5.84606e-07	24.011	9.14727	-2.18765	0.999001	0.000999001	4
0100001001011111_0111	6.72297e-06	76.553	14.0901	-2.1684	0.993007	0.00699301	46
0110010000010111_0111	0.000143667	1123.8	64.9947	-2.16638	0.984016	0.015984	983
0100001000001100_0111	1.54921e-05	177.694	33.1003	-2.16596	0.987013	0.012987	106
0000101111010111_0111	1.35921e-05	129.934	17.0801	-2.16239	0.989011	0.010989	93
0000111000101010_0111	0.000554791	4224.44	198.273	-2.16086	0.988012	0.011988	3796
0100001010101100_0111	1.31536e-06	39.653	14.2112	-2.15696	0.998002	0.001998	9
0100001001100010_0111	0.000537838	3864.18	85.552	-2.15288	0.984016	0.015984	3680
0100001011111100_0111	7.30758e-07	24.822	9.21071	-2.15206	0.999001	0.000999001	5
0110010100010101_0111	0.000140013	1073.99	53.9512	-2.1499	0.986014	0.013986	958
0100001001010010_0111	0.000118529	862.21	23.8379	-2.14826	0.982018	0.017982	811
0000111101110001_0111	0.00378211	27042.2	542.452	-2.14619	0.984016	0.015984	25878
0100011111000110_0111	2.04612e-05	203.962	29.8481	-2.14292	0.992008	0.00799201	140
0100011111110100_0111	5.21761e-05	467.716	51.8734	-2.13435	0.988012	0.011988	357
0010000000001100_0011	0.000662651	5732.1	561.343	-2.13435	0.988012	0.011988	4534
0100000011000100_0111	2.29458e-05	244.938	41.3104	-2.12871	0.985015	0.014985	157
0100001011110011_0111	3.5661e-05	355.254	52.2936	-2.12749	0.984016	0.015984	244
0110010100010000_0111	0.000112244	878.336	51.9246	-2.12493	0.986014	0.013986	768
0000101111010110_0111	1.46152e-07	2.924	0.908322	-2.11819	0.999001	0.000999001	1
0110011100101100_0111	5.99222e-06	72.773	15.0173	-2.11576	0.992008	0.00799201	41
0100001011111111_0111	8.18449e-06	140.096	39.7801	-2.11402	0.993007	0.00699301	56
0010000101000000_0011	0.000228727	2212.55	306.421	-2.11328	0.992008	0.00799201	1565
0000101100010010_0111	4.36993e-05	339.596	19.2222	-2.11194	0.978022	0.021978	299
0100011111101001_0111	1.03768e-05	158.908	41.6977	-2.10822	0.997003	0.002997	71
0100001001111100_0111	8.03834e-06	94.664	18.8926	-2.09945	0.987013	0.012987	55
0110000000001110_0111	1.31536e-06	37.386	13.565	-2.09259	1	0	9
0100011111110101_0111	0.000116191	1021.31	108.365	-2.08843	0.986014	0.013986	795
0000111110110001_0111	0.000648475	4981.16	261.125	-2.08392	0.985015	0.014985	4437
0100000011000011_0111	1.6369e-05	183.489	34.3228	-2.08284	0.989011	0.010989	112
0000100001110110_0111	0.00142089	10149.3	205.331	-2.08103	0.976024	0.023976	9722
0100011111110000_0111	0.000198766	1723.07	174.707	-2.07817	0.984016	0.015984	1360
0110001000001010_0111	2.19227e-06	37.901	11.0664	-2.06941	0.997003	0.002997	15
0100000011011011_0111	4.67685e-06	81.306	23.8715	-2.06548	0.996004	0.003996	32
0110001100010111_0111	4.06301e-05	358.266	38.8705	-2.06496	0.992008	0.00799201	278
0110011100100111_0111	0.000779865	5808.66	229.325	-2.06109	0.986014	0.013986	5336
0110011100001011_0111	5.26146e-06	68.596	15.8262	-2.05963	0.988012	0.011988	36
0000111111101101_0111	0.000211481	1601.6	75.1324	-2.05765	0.978022	0.021978	1447
0000111101100101_0111	0.000358802	2619.73	80.073	-2.0573	0.974026	0.025974	2455
0000111101100110_0111	0.00108328	7738.41	158.664	-2.05727	0.976024	0.023976	7412
0111011000000011_0111	3.21533e-06	42.109	9.77582	-2.05701	0.994006	0.00599401	22
0100001010001100_0111	1.89997e-06	50.733	18.3474	-2.05659	0.998002	0.001998	13
0100001011101001_0111	5.40761e-06	92.453	26.9765	-2.0556	0.994006	0.00599401	37
0100000010000110_0111	8.16987e-05	737.048	86.6399	-2.05504	0.979021	0.020979	559
0100001001011100_0111	1.89997e-06	28.751	7.67541	-2.05214	0.996004	0.003996	13
0000101101110101_0111	0.000369325	2735.69	101.99	-2.04622	0.976024	0.023976	2527
0100001000100011_0111	0.00151398	10829.4	230.328	-2.04219	0.974026	0.025974	10359
0110010100010111_0111	0.000145859	1116.74	58.1692	-2.04129	0.984016	0.015984	998
0000111110100100_0111	0.000245827	1877.2	95.6975	-2.03973	0.989011	0.010989	1682
0000100001110100_0111	0.00101634	7292.81	166.161	-2.03902	0.978022	0.021978	6954
0100010001010100_0111	0.000633129	4527.78	96.0676	-2.03799	0.987013	0.012987	4332
0100000010010100_0111	1.43229e-05	140.626	21.036	-2.02633	0.988012	0.011988	98
0100001000001101_0111	2.71842e-05	254.747	33.9483	-2.02505	0.984016	0.015984	186
0100000011011010_0111	4.38455e-07	18.917	7.86282	-2.02434	1	0	3
0000100001000100_0111	0.000467393	3392.76	96.3054	-2.02233	0.984016	0.015984	3198
0000111001010010_0111	0.000189266	1358.84	31.6575	-2.01649	0.981019	0.018981	1295
0110000000001111_0111	7.16143e-06	104.809	27.6795	-2.01625	0.998002	0.001998	49
0100000011010001_0111	5.08608e-05	537.096	93.7917	-2.01613	0.986014	0.013986	348
0110001000001101_0111	1.31536e-06	25.221	8.05575	-2.01359	0.998002	0.001998	9
0010000010101101_0011	6.92759e-05	877.432	200.486	-2.01227	0.985015	0.014985	474
0000101011000100_0111	2.42612e-05	206.542	20.2095	-2.00609	0.979021	0.020979	166
0000100001110001_0111	0.00495074	35149.3	636.046	-2.00498	0.973027	0.026973	33874
0100001101100001_0111	0.000231796	1719.14	66.4747	-2.00284	0.968032	0.031968	1586
0100011111101101_0111	2.04612e-06	45.754	15.8939	-1.99787	0.999001	0.000999001	14
0100001001010001_0111	0.000244219	1787.55	58.3596	-1.9971	0.973027	0.026973	1671
0110010100000100_0111	0.000302826	2261.13	94.8583	-1.99383	0.982018	0.017982	2072
0000111000111010_0111	0.000140744	1064.67	51.0266	-1.99253	0.979021	0.020979	963
0100001101000001_0111	0.000100991	735.843	22.5086	-1.99226	0.971029	0.028971	691
0100001000001111_0111	3.47841e-05	325.608	44.0585	-1.98845	0.989011	0.010989	238
0100111000101011_0111	1.22767e-05	168.106	42.3052	-1.98808	0.988012	0.011988	84
0100000011100010_0111	5.80222e-05	507.899	55.8613	-1.98526	0.976024	0.023976	397
0100000011110111_0111	0.000151121	1367.72	168.21	-1.98394	0.987013	0.012987	1034
0110010000010110_0111	4.07763e-05	322.114	21.8001	-1.9777	0.978022	0.021978	279
0000101111000111_0111	2.39689e-05	213.978	25.2719	-1.97761	0.976024	0.023976	164
0110011100001010_0111	2.48458e-06	39.069	11.1638	-1.97683	0.993007	0.00699301	17
0000111010010001_0111	0.000121452	919.405	44.8163	-1.97261	0.978022	0.021978	831
0010000001011110_0011	5.11531e-06	73.802	19.6737	-1.97228	0.987013	0.012987	35
0100001000110011_0111	0.00067829	4863.2	112.678	-1.97197	0.973027	0.026973	4641
0100000011110000_0111	0.000203151	1799.43	207.681	-1.97146	0.987013	0.012987	1390
0100000011010011_0111	2.20689e-05	256.006	53.3037	-1.96996	0.993007	0.00699301	151
0010000001011101_0011	4.89608e-05	476.25	71.7819	-1.96777	0.986014	0.013986	335
0000111101010100_0111	0.00038014	2734	67.6344	-1.96644	0.976024	0.023976	2601
0100010001110001_0111	0.00287758	20511.9	419.231	-1.96295	0.983017	0.016983	19689
0100000011001000_0111	2.8938e-05	363.724	84.6595	-1.95754	0.991009	0.00899101	198
0100000011110011_0111	0.000123352	1114.74	138.452	-1.95546	0.985015	0.014985	844
0000101000100010_0111	0.00137675	9909.78	250.505	-1.95516	0.969031	0.030969	9420
0011000011110101_0011	8.18449e-06	115.797	30.6356	-1.95188	0.986014	0.013986	56
0010000001000101_0011	0.00282716	20935.6	817.788	-1.94622	0.972028	0.027972	19344
0110000000001000_0111	3.03995e-05	344.579	70.1831	-1.94604	0.988012	0.011988	208
0000101011000110_0111	1.02306e-05	85.432	7.94648	-1.94199	0.981019	0.018981	70
0000101000100011_0111	0.00135731	9743.24	235.059	-1.94095	0.974026	0.025974	9287
0111011100110011_0111	2.44073e-05	227.12	31.1008	-1.93307	0.984016	0.015984	167
0000101111001100_0111	9.3537e-06	81.898	9.28093	-1.92847	0.966034	0.033966	64
0110010001001110_0111	1.89997e-06	33.065	10.4152	-1.9265	0.993007	0.00699301	13
0100000011100100_0111	3.39072e-05	312.776	42.0433	-1.92126	0.979021	0.020979	232
0100001100110001_0111	0.00128716	9245.14	228.05	-1.92124	0.968032	0.031968	8807
0000110011010011_0111	0.000110783	870.05	58.3222	-1.92122	0.974026	0.025974	758
0100000010010001_0111	0.000115167	1045.49	134.363	-1.91641	0.98002	0.01998	788
0100000011101000_0111	4.12147e-05	477.556	102.157	-1.91427	0.988012	0.011988	282
0000111001000111_0111	0.000505831	3611.84	79.0652	-1.90777	0.979021	0.020979	3461
0100001010111110_0111	1.31536e-06	26.264	9.06391	-1.9047	0.991009	0.00899101	9
0100001010101101_0111	3.79994e-06	56.918	16.2365	-1.90422	0.994006	0.00599401	26
0110111100000010_0111	1.02306e-06	27.205	10.6154	-1.90338	0.996004	0.003996	7
0100000011100111_0111	6.9422e-05	615.254	73.6956	-1.90315	0.985015	0.014985	475
0110011100100010_0111	0.000205489	1585.55	94.3692	-1.90263	0.981019	0.018981	1406
0110011101001111_0111	4.96915e-06	62.241	14.8607	-1.90038	0.988012	0.011988	34
0010001000010001_0011	0.00391496	28583.2	945.672	-1.89944	0.962038	0.037962	26787
0000111000000101_0111	0.00104513	7437.05	151.277	-1.89087	0.97003	0.02997	7151
0000101111010001_0111	2.67457e-05	232.336	26.1152	-1.88917	0.971029	0.028971	183
0100001000010010_0111	0.000106545	765.689	19.4373	-1.88755	0.965035	0.034965	729
0000111001100111_0111	0.00131566	9375.42	198.697	-1.87932	0.976024	0.023976	9002
0100001010110110_0111	1.16921e-05	114.206	18.2027	-1.87917	0.974026	0.025974	80
0010000001111100_0011	0.000132121	1147.16	129.506	-1.8776	0.974026	0.025974	904
0100000010000011_0111	0.000202712	1758.98	198.131	-1.87745	0.974026	0.025974	1387
0000101000010111_0111	0.000240273	1722.74	41.9684	-1.87608	0.972028	0.027972	1644
0100001001011101_0111	4.2384e-06	48.898	10.638	-1.87047	0.991009	0.00899101	29
0110011001100110_0111	0.000135775	1044.03	61.5843	-1.86785	0.979021	0.020979	929
0000100001010110_0111	0.000115021	833.213	24.8754	-1.85778	0.967033	0.032967	787
0100000011011001_0111	1.03768e-05	148.02	41.5519	-1.85359	0.994006	0.00599401	71
0100001011111001_0111	6.57682e-06	94.307	26.6426	-1.85068	0.992008	0.00799201	45
0011001000001111_0011	7.30758e-07	27.59	12.2155	-1.84929	0.996004	0.003996	5
0100010001110110_0111	0.00137865	9757.26	175.876	-1.8437	0.974026	0.025974	9433
0100001011101110_0111	1.60767e-06	32.501	11.6637	-1.84341	0.994006	0.00599401	11
0110111100000110_0111	2.19227e-06	41.167	14.1969	-1.84315	0.992008	0.00799201	15
0100001000000010_0111	0.000886263	6285.02	120.058	-1.84098	0.963037	0.036963	6064
0110011100011111_0111	4.5307e-06	57.106	14.2191	-1.83598	0.983017	0.016983	31
0110010100010011_0111	6.07991e-05	467.368	28.0553	-1.83096	0.972028	0.027972	416
0111011001100001_0111	2.17766e-05	208.024	32.3118	-1.8267	0.983017	0.016983	149
0110011100001100_0111	5.69991e-06	68.647	16.238	-1.82578	0.983017	0.016983	39
0100011000010001_0111	0.000270965	1959.06	57.5631	-1.82507	0.97003	0.02997	1854
0100111001101001_0111	1.76843e-05	219.704	54.2769	-1.81853	0.974026	0.025974	121
0100011110010001_0111	6.38682e-05	572.766	74.676	-1.81807	0.976024	0.023976	437
0100000010010110_0111	1.38844e-05	130.346	19.4549	-1.81681	0.978022	0.021978	95
0100001001000010_0111	9.42678e-05	684.735	21.8754	-1.81642	0.96004	0.03996	645
0110001100010001_0111	8.18449e-05	666.093	58.4518	-1.81505	0.973027	0.026973	560
0100001010010110_0111	2.04612e-06	24.642	5.87847	-1.81034	0.982018	0.017982	14
0100011111110011_0111	0.000134313	1138.33	121.183	-1.80991	0.976024	0.023976	919
0000101000100111_0111	0.0012743	9045.8	180.986	-1.80564	0.961039	0.038961	8719
0000111110100001_0111	0.000861125	6368.63	264.16	-1.80433	0.962038	0.037962	5892
0111111100100000_0111	7.30758e-07	24.608	10.869	-1.80404	0.998002	0.001998	5
0110011101111100_0111	5.69991e-06	69.162	16.7496	-1.80076	0.981019	0.018981	39
0110111000000101_0111	2.92303e-06	51.316	17.4133	-1.7984	0.984016	0.015984	20
0000111101100000_0111	0.00206731	14673.4	293.867	-1.79824	0.964036	0.035964	14145
0000111111101001_0111	0.000639121	4688.63	175.687	-1.79653	0.97003	0.02997	4373
0110011100011110_0111	1.46152e-07	8.623	4.25241	-1.79263	0.996004	0.003996	1
0000111010101011_0111	0.000235889	1775.86	90.2993	-1.79245	0.956044	0.043956	1614
0110111000000110_0111	1.89997e-06	34.529	12.0187	-1.79129	0.984016	0.015984	13
0000110011001001_0111	0.000677997	4985.5	193.509	-1.79061	0.952048	0.047952	4639
0100011110100011_0111	7.01528e-05	642.194	90.6805	-1.78863	0.965035	0.034965	480
0110000100001010_0111	1.16921e-06	18.116	5.6569	-1.78826	0.979021	0.020979	8
0100111000101001_0111	2.26535e-05	271.963	65.488	-1.78602	0.977023	0.022977	155
0010001000001011_0011	0.000329718	2870.1	344.093	-1.78469	0.974026	0.025974	2256
0110010100001000_0111	2.74765e-05	262.615	41.858	-1.78257	0.969031	0.030969	188
0100010001010001_0111	0.00133612	9496.39	199.264	-1.77851	0.97003	0.02997	9142
0100001000101100_0111	1.91459e-05	195.607	36.36	-1.77687	0.968032	0.031968	131
0100011001001010_0111	1.41767e-05	129.837	18.4823	-1.77668	0.963037	0.036963	97
0000101101110011_0111	0.000767734	5562.55	174.291	-1.77606	0.956044	0.043956	5253
0100001100100001_0111	0.000717166	5134.38	128.03	-1.776	0.964036	0.035964	4907
0110001100010011_0111	3.71225e-05	306.894	29.7871	-1.77573	0.975025	0.024975	254
0100011011101010_0111	9.93831e-06	112.578	25.1359	-1.77348	0.983017	0.016983	68
0100110010100010_0111	8.91525e-06	163.302	57.7122	-1.77262	0.988012	0.011988	61
0001000100010000_0001	0.0037637	28222.3	1394.78	-1.77112	0.952048	0.047952	25752
0110001000001111_0111	2.77688e-06	40.838	12.3512	-1.76809	0.994006	0.00599401	19
0001000100000010_0001	0.00370699	29878.5	2557	-1.76555	0.952048	0.047952	25364
0010000000001111_0011	0.000393294	3298.18	343.973	-1.76518	0.964036	0.035964	2691
0100001011110110_0111	1.59305e-05	155.312	26.2495	-1.7643	0.97003	0.02997	109
0110001100010010_0111	5.40761e-06	50.436	7.62181	-1.76284	0.974026	0.025974	37
0110110100001010_0111	1.46152e-07	8.498	4.25795	-1.76094	0.999001	0.000999001	1
0000111010010110_0111	5.53915e-05	416.769	21.4482	-1.76094	0.966034	0.033966	379
0110111100000000_0111	9.93831e-06	165.235	55.3303	-1.75735	0.983017	0.016983	68
0100001010101111_0111	1.21306e-05	153.891	40.4354	-1.75319	0.977023	0.022977	83
0111111000100000_0111	2.04612e-06	34.956	11.9607	-1.75207	0.984016	0.015984	14
0110010100100001_0111	0.000344333	2680.63	185.455	-1.75047	0.967033	0.032967	2356
0100000010000101_0111	0.000147321	1263.37	145.965	-1.74952	0.966034	0.033966	1008
0000101111010000_0111	1.49075e-05	131.768	17.0263	-1.74836	0.968032	0.031968	102
0010000010011101_0011	1.62228e-05	319.79	119.545	-1.74654	0.98002	0.01998	111
0000101000110010_0111	0.000505831	3625.03	93.9762	-1.74546	0.953047	0.046953	3461
0100000010101000_0111	0.000114875	1215.17	246.426	-1.7416	0.98002	0.01998	786
0110100001100110_0111	8.7691e-07	30.178	13.8944	-1.74012	0.992008	0.00799201	6
0011000011110000_0011	1.69536e-05	313.713	113.621	-1.74011	0.985015	0.014985	116
0100010011101101_0111	5.55376e-06	80.623	24.5232	-1.73807	0.983017	0.016983	38
0100010001010000_0111	0.0018684	13108.5	186.804	-1.73699	0.955045	0.044955	12784
0100001001111101_0111	1.32998e-05	129.865	22.3788	-1.73669	0.969031	0.030969	91
0100001000000111_0111	0.00071775	5098.89	108.41	-1.73313	0.952048	0.047952	4911
0110011000001100_0111	3.36149e-06	41.938	10.9482	-1.72978	0.973027	0.026973	23
0110100001110110_0111	8.7691e-07	31.824	14.9817	-1.7237	0.987013	0.012987	6
0110001100001111_0111	4.38455e-06	56.046	15.1333	-1.7211	0.977023	0.022977	30
0000111110110101_0111	0.000265411	1960.99	84.3904	-1.71806	0.962038	0.037962	1816
0110011101001100_0111	2.33843e-06	30.882	8.67741	-1.71503	0.978022	0.021978	16
0110110100000001_0111	1.57844e-05	199.401	53.3082	-1.71458	0.969031	0.030969	108
0100011000111010_0111	2.04612e-05	180.342	23.5368	-1.714	0.963037	0.036963	140
0000111001011100_0111	0.000100552	741.17	31.1291	-1.70805	0.953047	0.046953	688
0100111001011011_0111	2.63073e-06	34.086	9.41888	-1.70785	0.976024	0.023976	18
0110011100001110_0111	3.50764e-06	45.668	12.6976	-1.70646	0.978022	0.021978	24
0001000000000110_0001	0.00353175	27545.4	1985.19	-1.70281	0.961039	0.038961	24165
0110010101001100_0111	2.48458e-06	32.273	8.99352	-1.69822	0.978022	0.021978	17
0100001010111101_0111	8.7691e-07	17.123	6.55216	-1.69761	0.981019	0.018981	6
0110011101100101_0111	0.000143229	1084.8	61.7599	-1.69696	0.96004	0.03996	980
0000111110110000_0111	0.000529069	3934.73	185.616	-1.69559	0.96004	0.03996	3620
0010001010101101_0011	7.74603e-06	99.484	27.4515	-1.69331	0.969031	0.030969	53
0100001101110001_0111	0.0013766	9819.14	236.63	-1.69097	0.956044	0.043956	9419
0100001010011100_0111	1.46152e-07	5.638	2.74381	-1.69035	0.996004	0.003996	1
0000111001001000_0111	0.000517815	3815.73	161.391	-1.68988	0.958042	0.041958	3543
0110100001111010_0111	1.46152e-07	12.82	6.99589	-1.68956	0.994006	0.00599401	1
0100001010111100_0111	7.30758e-07	16.125	6.58489	-1.68947	0.986014	0.013986	5
0110111100000111_0111	8.7691e-06	139.835	47.3304	-1.68676	0.977023	0.022977	60
0110011101101110_0111	4.67685e-06	56.963	14.8227	-1.6841	0.98002	0.01998	32
0100010001100101_0111	0.000364648	2589	55.8892	-1.68194	0.953047	0.046953	2495
0100011111010011_0111	1.95843e-05	185.027	30.3461	-1.6815	0.965035	0.034965	134
0100011000010100_0111	0.000104206	743.694	18.2566	-1.68126	0.954046	0.045954	713
0100011001010100_0111	0.000301949	2136.27	41.8603	-1.67875	0.951049	0.048951	2066
0000111011001101_0111	0.000207974	1507.57	50.401	-1.67798	0.957043	0.042957	1423
0100000011100011_0111	5.67068e-05	487.365	59.3346	-1.67465	0.965035	0.034965	388
0000110011000011_0111	0.000108006	818.213	47.3264	-1.67376	0.957043	0.042957	739
0110001100001010_0111	1.02306e-06	16.532	5.70066	-1.67209	0.982018	0.017982	7
0110001000011111_0111	4.38455e-07	9.337	3.79128	-1.67147	0.986014	0.013986	3
0110001000011000_0111	8.7691e-07	18.378	7.41405	-1.66953	0.985015	0.014985	6
0011000011110100_0011	5.11531e-06	81.698	28.0023	-1.66765	0.977023	0.022977	35
0011001001000101_0011	7.59988e-06	151.191	59.6601	-1.6626	0.978022	0.021978	52
0100001010001001_0111	1.65151e-05	209.079	57.8181	-1.66175	0.974026	0.025974	113
0110111100100010_0111	3.79994e-06	61.847	21.6002	-1.65957	0.981019	0.018981	26
0100000010010000_0111	0.000125252	1054.32	118.956	-1.65874	0.959041	0.040959	857
0110100000000110_0111	2.63073e-06	46.942	17.4648	-1.65717	0.969031	0.030969	18
0100011111101000_0111	2.65996e-05	300.417	71.666	-1.65235	0.976024	0.023976	182
0110100001110111_0111	5.55376e-06	117.756	48.2983	-1.65132	0.977023	0.022977	38
0000111101000000_0111	0.00108664	7714.93	169.883	-1.64779	0.953047	0.046953	7435
0010001011111000_0011	1.75382e-06	64.027	31.5769	-1.64763	0.997003	0.002997	12
0100011111110001_0111	0.000263365	2151.43	212.651	-1.6432	0.959041	0.040959	1802
0100011111000111_0111	6.40144e-05	568.379	79.4727	-1.64055	0.96004	0.03996	438
0100001010010111_0111	7.16143e-06	74.095	15.3035	-1.63982	0.963037	0.036963	49
0100011111000011_0111	1.91459e-05	188.374	35.1399	-1.63273	0.962038	0.037962	131
0100011000110101_0111	0.000200666	1432.49	36.4455	-1.63222	0.949051	0.0509491	1373
0100011011000010_0111	1.60767e-05	148.117	23.3587	-1.63181	0.961039	0.038961	110
0100001010100110_0111	1.89997e-05	173.693	26.8027	-1.63017	0.96004	0.03996	130
0110111101000110_0111	5.84606e-07	15.671	7.17567	-1.62647	0.979021	0.020979	4
0010000001000010_0011	0.00147292	11030	585.901	-1.6249	0.946054	0.0539461	10078
0100011001000101_0111	0.000429247	3040.82	63.9	-1.62473	0.952048	0.047952	2937
0100001001010011_0111	0.000131829	944.833	26.3739	-1.62407	0.94006	0.0599401	902
0100001011110001_0111	3.34687e-05	312.516	51.4345	-1.62374	0.955045	0.044955	229
0111011000100000_0111	0.000136506	1064.44	80.3533	-1.62331	0.952048	0.047952	934
0110111000001001_0111	1.16921e-06	25.261	10.6373	-1.62269	0.97003	0.02997	8
0100010001110100_0111	0.00128029	9079.29	197.158	-1.61949	0.945055	0.0549451	8760
0110011000001000_0111	2.07535e-05	198.078	34.6717	-1.6174	0.956044	0.043956	142
0100000011110110_0111	4.57454e-05	403.312	55.9021	-1.61554	0.956044	0.043956	313
0100011000010011_0111	0.000153605	1105.51	33.7531	-1.61499	0.932068	0.0679321	1051
0100001001000101_0111	4.89608e-05	364.415	18.2139	-1.61498	0.939061	0.0609391	335
0111111101100000_0111	8.7691e-07	22.571	10.2665	-1.61409	0.987013	0.012987	6
0010001011111010_0011	4.38455e-07	35.04	19.8522	-1.61393	0.998002	0.001998	3
0100001010010001_0111	7.01528e-06	78.638	18.9884	-1.61351	0.967033	0.032967	48
0111011100110001_0111	6.32836e-05	530.626	60.5254	-1.61298	0.965035	0.034965	433
0100001000100111_0111	0.00110008	7804.74	172.374	-1.61127	0.948052	0.0519481	7527
0010000111101000_0011	2.77688e-06	46.4	17.0088	-1.61093	0.971029	0.028971	19
0000101101100011_0111	0.000175528	1280.57	49.4376	-1.6094	0.939061	0.0609391	1201
0100000010110001_0111	0.000186782	1585.23	191.122	-1.60749	0.961039	0.038961	1278
0000111000110001_0111	0.000865948	6120.34	121.554	-1.60703	0.951049	0.048951	5925
0100011011101101_0111	7.45373e-06	82	19.3614	-1.60113	0.97003	0.02997	51
0010000001101111_0011	0.000133583	1120.2	128.83	-1.6006	0.956044	0.043956	914
0110011100110011_0111	0.000296395	2199.58	107.397	-1.59761	0.953047	0.046953	2028
0100011001101010_0111	5.88991e-05	495.217	57.7441	-1.59699	0.95005	0.04995	403
0110111000001111_0111	5.84606e-07	16.708	7.96179	-1.59612	0.981019	0.018981	4
0000111110100000_0111	0.00114232	8391.58	360.774	-1.5954	0.954046	0.045954	7816
0010000001010101_0011	0.00112507	8410.62	446.919	-1.59453	0.939061	0.0609391	7698
0100111000001001_0111	2.36766e-05	274.68	70.679	-1.59425	0.953047	0.046953	162
0100001000011001_0111	1.37382e-05	121.511	17.2673	-1.59324	0.957043	0.042957	94
0010000010001101_0011	6.9422e-05	908.37	272.086	-1.59277	0.966034	0.033966	475
0110111100000001_0111	9.49985e-06	141.425	47.9924	-1.59244	0.97003	0.02997	65
0100001011111011_0111	8.18449e-06	102.9	29.4837	-1.59071	0.975025	0.024975	56
0110011101000100_0111	8.6814e-05	664.022	44.1135	-1.58732	0.948052	0.0519481	594
0100000010010111_0111	6.13837e-05	528.209	68.1769	-1.58718	0.959041	0.040959	420
0110001000000010_0111	0.000101575	785.926	57.3058	-1.58668	0.946054	0.0539461	695
0100111001001001_0111	8.91525e-06	104.569	27.4765	-1.58568	0.959041	0.040959	61
0111011000100010_0111	4.73531e-05	380.048	35.3699	-1.58462	0.952048	0.047952	324
0110001000001100_0111	1.16921e-06	18.623	6.71043	-1.58306	0.975025	0.024975	8
0010000001111110_0011	6.66451e-05	587.933	83.3898	-1.58212	0.953047	0.046953	456
0100000011110001_0111	0.000159013	1369.03	177.63	-1.58209	0.954046	0.045954	1088
0100001000110000_0111	0.00103168	7278.97	139.145	-1.58087	0.94006	0.0599401	7059
0100001000110111_0111	0.000591037	4191.2	93.2772	-1.57815	0.946054	0.0539461	4044
0000111111110110_0111	0.000266142	2001.53	114.418	-1.57777	0.951049	0.048951	1821
0011001010100100_0011	1.02306e-06	20.109	8.32553	-1.57455	0.981019	0.018981	7
0110011000011100_0111	1.46152e-07	5.407	2.80771	-1.56961	0.991009	0.00899101	1
0110011100111010_0111	2.92303e-06	34.842	9.48277	-1.56515	0.97003	0.02997	20
0010000111000101_0011	1.89997e-06	35.601	14.4436	-1.56477	0.982018	0.017982	13
0110010000010011_0111	9.32447e-05	740.599	65.6306	-1.56328	0.947053	0.0529471	638
0010000010001110_0011	1.56382e-05	253.345	93.6307	-1.563	0.967033	0.032967	107
0110011000100101_0111	0.000141913	1081.28	70.5619	-1.56281	0.943057	0.0569431	971
0000111011001001_0111	0.000325187	2358.95	85.8253	-1.56068	0.932068	0.0679321	2225
0110011101001010_0111	7.30758e-07	11.389	4.10348	-1.55697	0.969031	0.030969	5
0000101001010111_0111	0.000283973	2008.65	42.1758	-1.55663	0.931069	0.0689311	1943
0100110010101001_0111	4.38455e-06	116.896	55.9032	-1.5544	0.993007	0.00699301	30
0010000101010000_0011	5.39299e-05	572.939	131.301	-1.55322	0.948052	0.0519481	369
0000100001010011_0111	0.00067639	4786.25	101.896	-1.55306	0.943057	0.0569431	4628
0111011001000001_0111	1.76843e-05	154.374	21.5052	-1.55191	0.959041	0.040959	121
0100001101100011_0111	0.000258104	1854.1	56.8016	-1.55099	0.938062	0.0619381	1766
0010000010001111_0011	3.88763e-05	548.315	182.025	-1.55096	0.954046	0.045954	266
0100000011111001_0111	3.21533e-05	376.38	100.863	-1.55042	0.978022	0.021978	220
0110000100001110_0111	8.7691e-07	15.558	6.17566	-1.54769	0.979021	0.020979	6
0010000001010011_0011	0.00145889	11005.8	662.308	-1.54584	0.931069	0.0689311	9982
0100000011001010_0111	4.96915e-06	60.46	17.1179	-1.54575	0.964036	0.035964	34
0000101000110110_0111	0.000163544	1161.27	27.3921	-1.54318	0.939061	0.0609391	1119
0110110100011101_0111	4.38455e-07	10.841	5.09153	-1.54001	0.976024	0.023976	3
0100011000110001_0111	0.00053433	3822.09	107.886	-1.53952	0.935065	0.0649351	3656
0010000110101001_0011	5.72914e-05	632.328	156.149	-1.5391	0.952048	0.047952	392
0110011100100101_0111	0.000290988	2152.58	105.096	-1.53744	0.935065	0.0649351	1991
0111111000110111_0111	1.46152e-07	7.208	4.04414	-1.53506	0.992008	0.00799201	1
0100001011111000_0111	1.89997e-05	211.021	52.7873	-1.53486	0.953047	0.046953	130
0111111000000000_0111	1.31536e-06	25.275	10.6103	-1.53389	0.972028	0.027972	9
0110110100001001_0111	3.50764e-06	50.929	17.5705	-1.53263	0.963037	0.036963	24
0000000011110001_0011	0.00532825	37938.5	967.39	-1.5314	0.923077	0.0769231	36457
0100011111000000_0111	8.1991e-05	706.961	95.4792	-1.52872	0.953047	0.046953	561
0100010001010011_0111	0.000520592	3685.41	80.8038	-1.52732	0.953047	0.046953	3562
0000111001000010_0111	0.000224635	1600	41.2563	-1.52706	0.935065	0.0649351	1537
0110110000000010_0111	5.99222e-06	89.914	32.0474	-1.5263	0.966034	0.033966	41
0011000011110111_0011	1.49075e-05	170.407	44.8464	-1.52536	0.957043	0.042957	102
0011000011100100_0011	1.30075e-05	151.8	41.1989	-1.52431	0.958042	0.041958	89
0110110101111010_0111	1.46152e-07	5.605	3.02293	-1.52336	0.99001	0.00999001	1
0100001010110111_0111	2.93765e-05	263.683	41.149	-1.52332	0.939061	0.0609391	201
0100001100100010_0111	0.000754288	5364.88	133.929	-1.52231	0.927073	0.0729271	5161
0100011001111010_0111	5.39299e-05	445.826	50.4729	-1.52212	0.939061	0.0609391	369
0100001001101111_0111	2.04612e-05	188.124	31.6364	-1.52116	0.947053	0.0529471	140
0000101001110101_0111	0.000358656	2558.82	68.9947	-1.51925	0.937063	0.0629371	2454
0100010001110011_0111	0.00167928	11939	296.156	-1.51594	0.945055	0.0549451	11490
0100000011010100_0111	1.11075e-05	109.641	22.2245	-1.51369	0.95005	0.04995	76
0000111001010100_0111	0.000349741	2463.12	46.3319	-1.51338	0.933067	0.0669331	2393
0100111001000010_0111	7.89219e-06	85.692	20.9551	-1.51238	0.951049	0.048951	54
0100001000111010_0111	2.33843e-05	203.033	28.4961	-1.51014	0.934066	0.0659341	160
0100011110000001_0111	0.000224489	1868.52	220.205	-1.51005	0.942058	0.0579421	1536
0010000001011111_0011	4.20917e-05	381.346	61.8829	-1.50843	0.942058	0.0579421	288
0000101100110001_0111	0.000860833	6180.83	192.834	-1.50817	0.929071	0.0709291	5890
0010000011101001_0011	5.33453e-05	856.299	325.881	-1.5076	0.969031	0.030969	365
0100011000110111_0111	0.000949401	6689.77	128.649	-1.50617	0.929071	0.0709291	6496
0011001001101100_0011	2.92303e-07	10.334	5.54213	-1.50376	0.99001	0.00999001	2
0011001001100111_0011	1.06691e-05	142.616	46.3002	-1.50358	0.96004	0.03996	73
0110010000001110_0111	8.47679e-06	92.931	23.2435	-1.50283	0.959041	0.040959	58
0111111000000101_0111	1.46152e-07	7.382	4.2476	-1.5025	0.989011	0.010989	1
0110001100011111_0111	1.31536e-06	20.156	7.42744	-1.502	0.959041	0.040959	9
0011000011110110_0011	2.33843e-06	36.843	13.89	-1.50057	0.961039	0.038961	16
0100011011000011_0111	8.03834e-06	79.134	16.0983	-1.49916	0.951049	0.048951	55
0010001010101001_0011	0.000123206	1346.57	335.935	-1.49901	0.94006	0.0599401	843
0100100010011010_0111	2.92303e-07	16.721	9.82414	-1.49845	0.993007	0.00699301	2
0011001000001011_0011	1.82689e-05	246.294	81.0025	-1.49741	0.949051	0.0509491	125
0100011000010111_0111	0.000325626	2303.35	50.472	-1.49287	0.928072	0.0719281	2228
0000101101110001_0111	0.00107728	7739.96	247.5	-1.49073	0.935065	0.0649351	7371
0000111010011010_0111	4.36993e-05	331.019	21.5242	-1.48758	0.92008	0.0799201	299
0100011000010101_0111	0.000153605	1093.91	28.887	-1.48558	0.929071	0.0709291	1051
0010000011110111_0011	0.000141621	1356.94	261.155	-1.48546	0.942058	0.0579421	969
0110010000001000_0111	7.43912e-05	643.172	90.3628	-1.48481	0.943057	0.0569431	509
0100000011101011_0111	1.38844e-05	152.011	38.4094	-1.4843	0.963037	0.036963	95
0000101101110010_0111	0.000379702	2725.02	85.6059	-1.48379	0.924076	0.0759241	2598
0100000011010101_0111	2.27996e-05	216.378	40.7002	-1.48348	0.944056	0.0559441	156
0110010100011111_0111	6.13837e-06	64.874	15.4249	-1.48293	0.95005	0.04995	42
0010001000100010_0011	0.00375244	26662.7	666.558	-1.48175	0.93007	0.0699301	25675
0110010100000110_0111	0.00012876	949.881	46.5277	-1.48043	0.932068	0.0679321	881
0000101110010110_0111	1.12537e-05	89.648	8.55086	-1.47915	0.941059	0.0589411	77
0110010000010010_0111	2.99611e-05	237.407	21.9372	-1.47726	0.936064	0.0639361	205
0100111010011111_0111	1.75382e-06	30.142	12.2964	-1.47539	0.962038	0.037962	12
0111111101110000_0111	8.7691e-07	19.867	9.40435	-1.47453	0.981019	0.018981	6
0100011110101001_0111	1.00845e-05	127.886	39.9508	-1.47396	0.961039	0.038961	69
0010000111101010_0011	5.84606e-07	14.241	6.9512	-1.47327	0.978022	0.021978	4
0010001000000011_0011	0.00283709	20390.6	664.509	-1.47271	0.929071	0.0709291	19412
0100000011111101_0111	1.2569e-05	159.368	49.8301	-1.47236	0.972028	0.027972	86
0110011001001111_0111	2.33843e-06	29.222	8.99809	-1.46942	0.949051	0.0509491	16
0110011000001110_0111	2.63073e-06	32.143	9.6374	-1.46751	0.955045	0.044955	18
0100111011101001_0111	1.12537e-05	141.535	43.998	-1.46677	0.936064	0.0639361	77
0110111111101000_0111	4.38455e-07	21.621	12.7107	-1.46499	0.981019	0.018981	3
0011000011000111_0011	4.5307e-06	76.461	31.0448	-1.46437	0.96004	0.03996	31
0100001011111101_0111	2.77688e-06	36.385	11.8723	-1.46433	0.957043	0.042957	19
0110110100000010_0111	1.31536e-06	19.822	7.39967	-1.4625	0.959041	0.040959	9
0110100000010101_0111	1.89997e-06	32.326	13.2432	-1.45931	0.956044	0.043956	13
0100001011101111_0111	5.26146e-06	64.586	19.6029	-1.45826	0.948052	0.0519481	36
0100001000111100_0111	6.28452e-06	64.649	14.8464	-1.4582	0.942058	0.0579421	43
0100100010010110_0111	1.31536e-06	23.876	10.2152	-1.45626	0.951049	0.048951	9
0111011000010100_0111	1.31536e-06	15.47	4.44554	-1.45539	0.953047	0.046953	9
0110011101111001_0111	1.13998e-05	117.961	27.5181	-1.45217	0.941059	0.0589411	78
0011001001001101_0011	2.92303e-07	9.703	5.30461	-1.45213	0.978022	0.021978	2
0100011000100011_0111	0.00114729	8102.27	173.739	-1.452	0.915085	0.0849151	7850
0110101001110010_0111	8.7691e-07	22.155	11.126	-1.452	0.963037	0.036963	6
0100001101100101_0111	3.72687e-05	285.927	21.347	-1.44877	0.922078	0.0779221	255
0011001000000111_0011	3.33226e-05	299.658	49.525	-1.44691	0.952048	0.047952	228
0100000010101010_0111	2.74765e-05	289.6	70.23	-1.44667	0.962038	0.037962	188
0110111001000010_0111	2.92303e-07	7.795	4.00637	-1.44645	0.972028	0.027972	2
0110111000010001_0111	5.84606e-07	17.374	9.27837	-1.44142	0.979021	0.020979	4
0100011000110000_0111	0.00123103	8647.89	156.077	-1.44088	0.918082	0.0819181	8423
0010000111101001_0011	2.48458e-06	44.578	19.1472	-1.44032	0.967033	0.032967	17
0000111101000010_0111	0.000153605	1096.28	31.4506	-1.43978	0.93007	0.0699301	1051
0000110010010111_0111	0.000249627	1842.83	93.6829	-1.43924	0.932068	0.0679321	1708
0110110000001011_0111	1.31536e-06	25.96	11.8144	-1.43554	0.961039	0.038961	9
0100001001100011_0111	0.000347402	2470.83	65.4394	-1.43388	0.916084	0.0839161	2377
0110110100000100_0111	8.47679e-06	91.851	23.6558	-1.43098	0.928072	0.0719281	58
0111111000100111_0111	7.30758e-07	15.913	7.64237	-1.42796	0.978022	0.021978	5
0110111100001001_0111	1.89997e-06	36.224	16.2717	-1.42726	0.959041	0.040959	13
0110100000110100_0111	5.84606e-07	15.209	7.86251	-1.42563	0.959041	0.040959	4
0000111110100010_0111	0.000350033	2586.28	134.471	-1.42245	0.931069	0.0689311	2395
0010000000011100_0011	0.000233843	1965.23	256.92	-1.42156	0.928072	0.0719281	1600
0011000011100101_0011	1.18383e-05	139.204	40.9681	-1.42071	0.934066	0.0659341	81
0000111001100010_0111	0.00100012	7032.19	133.25	-1.41977	0.92008	0.0799201	6843
0100001101010001_0111	0.000316272	2239.87	53.4431	-1.4196	0.92008	0.0799201	2164
0010001011111011_0011	4.09224e-06	106.119	55.037	-1.41939	0.986014	0.013986	28
0100000010100110_0111	6.06529e-05	507.076	64.9017	-1.4187	0.919081	0.0809191	415
0100000011101010_0111	1.02306e-05	110.243	28.3672	-1.41864	0.953047	0.046953	70
0110100000010110_0111	5.84606e-07	10.397	4.50952	-1.41856	0.954046	0.045954	4
0100001011110100_0111	4.96915e-06	51.147	12.092	-1.41805	0.941059	0.0589411	34
0010000001101110_0011	6.86912e-05	584.31	80.6469	-1.41741	0.936064	0.0639361	470
0100011110010101_0111	3.25918e-05	280.539	40.5948	-1.4174	0.94006	0.0599401	223
0110111100000101_0111	8.47679e-06	113.21	38.964	-1.41695	0.948052	0.0519481	58
0100110010100110_0111	1.06691e-05	121.635	34.3848	-1.41443	0.923077	0.0769231	73
0011001010111111_0011	1.46152e-07	11.89	7.70294	-1.41375	0.981019	0.018981	1
0100010001110000_0111	0.00464075	32480.5	514.84	-1.41304	0.928072	0.0719281	31753
0100101010111111_0111	1.46152e-06	44.1	24.137	-1.41277	0.972028	0.027972	10
0010000011110110_0011	4.50147e-05	430.718	86.8873	-1.41238	0.928072	0.0719281	308
0010001010101111_0011	6.43067e-06	81.099	26.2957	-1.41084	0.947053	0.0529471	44
0110101001101001_0111	1.46152e-07	8.307	5.18263	-1.4099	0.97003	0.02997	1
0110111000000100_0111	4.09224e-06	52.517	17.3967	-1.40929	0.942058	0.0579421	28
0100001010101000_0111	3.81456e-05	400.479	98.9903	-1.40902	0.953047	0.046953	261
0110010000001100_0111	1.78305e-05	167.265	32.1525	-1.40782	0.936064	0.0639361	122
0010000111110110_0011	1.46152e-07	9.484	6.0432	-1.40389	0.986014	0.013986	1
0100001101010011_0111	0.000164567	1166.96	29.2193	-1.40195	0.912088	0.0879121	1126
0100000011101110_0111	5.84606e-06	74.906	24.9465	-1.39924	0.963037	0.036963	40
0110100001110100_0111	8.7691e-07	22.213	11.5941	-1.39838	0.96004	0.03996	6
0010000001000011_0011	0.00338882	25034.8	1321.5	-1.39824	0.913087	0.0869131	23187
0000101000010000_0111	0.000491946	3469.01	73.6818	-1.39801	0.918082	0.0819181	3366
0100100001010011_0111	7.59988e-06	116.887	46.4256	-1.39766	0.933067	0.0669331	52
0100001001001010_0111	4.2384e-06	41.086	8.65503	-1.39641	0.935065	0.0649351	29
0110111101010100_0111	1.16921e-06	19.988	8.58916	-1.39571	0.953047	0.046953	8
0100001001011000_0111	1.76843e-05	153.995	23.6611	-1.39448	0.924076	0.0759241	121
0110011101011111_0111	8.47679e-06	83.573	18.3702	-1.39209	0.932068	0.0679321	58
0111111100110000_0111	1.46152e-07	6.402	3.88143	-1.39176	0.984016	0.015984	1
0111111101110010_0111	1.46152e-07	6.66	4.06829	-1.39125	0.98002	0.01998	1
0000111110101001_0111	0.000580514	4259.51	206.732	-1.39074	0.921079	0.0789211	3972
0100000011111100_0111	8.47679e-06	103.506	32.7427	-1.38981	0.954046	0.045954	58
0100001000111000_0111	5.80222e-05	477.015	57.6574	-1.38777	0.914086	0.0859141	397
0100001100110010_0111	0.000359533	2549.5	64.542	-1.38669	0.91009	0.0899101	2460
0011000011111011_0011	1.89997e-06	102.925	64.8818	-1.38598	0.979021	0.020979	13
0100001001001000_0111	1.41767e-05	129.579	23.5116	-1.38566	0.94006	0.0599401	97
0100001001101100_0111	8.03834e-06	80.025	18.0624	-1.38547	0.931069	0.0689311	55
0110111000001010_0111	5.84606e-07	12.429	6.08506	-1.3852	0.96004	0.03996	4
0110011100001111_0111	1.98766e-05	185.013	35.5031	-1.38053	0.926074	0.0739261	136
0110010100011100_0111	5.84606e-07	9.335	3.86467	-1.38045	0.96004	0.03996	4
0111011101110001_0111	7.77526e-05	624.995	67.3818	-1.38012	0.92008	0.0799201	532
0111111001110111_0111	7.30758e-07	14.988	7.23963	-1.37963	0.965035	0.034965	5
0010000000111110_0011	0.00023092	1895.82	229.794	-1.37437	0.917083	0.0829171	1580
0000100001100010_0111	0.0012075	8496.04	170.508	-1.37258	0.915085	0.0849151	8262
0110111000000111_0111	5.55376e-06	69.357	22.8481	-1.37241	0.93007	0.0699301	38
0100011001010101_0111	0.000416824	2926.97	54.6898	-1.37084	0.91009	0.0899101	2852
0100000011111110_0111	9.646e-06	118.677	38.4879	-1.36866	0.954046	0.045954	66
0100001010010100_0111	5.84606e-07	8.712	3.44629	-1.36727	0.959041	0.040959	4
0110101001110000_0111	3.36149e-06	60.41	27.3676	-1.36695	0.942058	0.0579421	23
0100101011001010_0111	1.46152e-07	9.04	5.88362	-1.36651	0.971029	0.028971	1
0110101101110001_0111	2.04612e-06	48.85	25.5087	-1.3662	0.952048	0.047952	14
0110111100001010_0111	2.92303e-07	8.929	5.07244	-1.36601	0.971029	0.028971	2
0110001000011011_0111	2.92303e-07	6.602	3.36912	-1.36594	0.973027	0.026973	2
0100001011001011_0111	5.84606e-07	11.565	5.53899	-1.36577	0.964036	0.035964	4
0111111100000000_0111	1.46152e-07	9.948	6.55395	-1.36528	0.993007	0.00699301	1
0100011111111111_0111	4.2384e-05	413.872	90.7408	-1.36512	0.935065	0.0649351	290
0100111001011010_0111	1.89997e-06	21.414	6.1643	-1.36496	0.937063	0.0629371	13
0111011001100000_0111	7.00066e-05	548.802	51.1877	-1.36365	0.925075	0.0749251	479
0000110010000100_0111	0.00100055	7184.31	248.205	-1.36304	0.91009	0.0899101	6846
0111111000110000_0111	2.92303e-07	7.223	3.83797	-1.36088	0.973027	0.026973	2
0100001011110010_0111	3.78533e-05	319.799	44.7122	-1.35978	0.918082	0.0819181	259
0010001010011010_0011	2.48458e-06	96.283	58.4078	-1.3574	0.936064	0.0639361	17
0100001011011100_0111	2.92303e-07	6.167	3.07157	-1.35663	0.956044	0.043956	2
0100110010100101_0111	1.95843e-05	209.451	55.6408	-1.35604	0.92008	0.0799201	134
0100001010111111_0111	7.30758e-06	82.742	24.1517	-1.35568	0.941059	0.0589411	50
0100001010111011_0111	6.13837e-06	79.606	27.7806	-1.35368	0.962038	0.037962	42
0000100001110000_0111	0.00594822	41725.9	758.696	-1.35347	0.908092	0.0919081	40699
0110010100010110_0111	2.82073e-05	213.156	14.8934	-1.35335	0.917083	0.0829171	193
0111011101100100_0111	2.39689e-05	195.559	23.3417	-1.35204	0.915085	0.0849151	164
0100000011011000_0111	1.57844e-05	167.931	44.3421	-1.35156	0.944056	0.0559441	108
0110111111110111_0111	1.16921e-06	48.079	29.6657	-1.35102	0.977023	0.022977	8
0010000001010001_0011	0.00240039	17926.9	1113.59	-1.34963	0.904096	0.0959041	16424
0100010001010110_0111	0.000138844	977.259	20.2053	-1.3491	0.905095	0.0949051	950
0110100000011111_0111	7.30758e-07	14.954	7.38339	-1.34816	0.96004	0.03996	5
0110011100100100_0111	0.000164859	1214.08	63.8572	-1.34796	0.905095	0.0949051	1128
0100101010111000_0111	2.92303e-06	71.592	38.285	-1.34758	0.971029	0.028971	20
0110111001001001_0111	5.84606e-07	11.853	5.82987	-1.34703	0.961039	0.038961	4
0100000010110011_0111	0.000144398	1207.83	163.253	-1.34656	0.908092	0.0919081	988
0010001010101110_0011	3.36149e-06	44.052	15.6399	-1.34604	0.942058	0.0579421	23
0111111000000001_0111	7.30758e-07	15.686	7.94157	-1.34558	0.961039	0.038961	5
0110101001111001_0111	1.46152e-07	8.188	5.3525	-1.34292	0.981019	0.018981	1
0100000011101101_0111	2.19227e-06	30.382	11.464	-1.34176	0.944056	0.0559441	15
0100001000111001_0111	3.31764e-05	275.186	35.9793	-1.33927	0.918082	0.0819181	227
0010000010001100_0011	9.33909e-05	1010.72	277.568	-1.33919	0.918082	0.0819181	639
0100001001011011_0111	9.0614e-06	78.803	12.5613	-1.33768	0.931069	0.0689311	62
0000101110011010_0111	1.31536e-05	103.169	9.84751	-1.33729	0.908092	0.0919081	90
0110000100011111_0111	1.89997e-06	24.41	8.53351	-1.33708	0.935065	0.0649351	13
0100001001110010_0111	0.000640729	4509.19	93.658	-1.33669	0.899101	0.100899	4384
0000111001011000_0111	0.000347402	2489.79	84.3956	-1.33647	0.908092	0.0919081	2377
0100100010101001_0111	8.33064e-06	184.411	95.4286	-1.33515	0.956044	0.043956	57
0110110100011011_0111	2.92303e-07	6.934	3.69693	-1.33462	0.965035	0.034965	2
0110010000010000_0111	0.000264827	1962.04	112.621	-1.33221	0.918082	0.0819181	1812
0100011000110100_0111	0.000173774	1231.17	31.662	-1.33175	0.907093	0.0929071	1189
0100001011101011_0111	6.57682e-06	71.615	19.9864	-1.33166	0.935065	0.0649351	45
0010000001010010_0011	0.000383502	2936.16	234.465	-1.33137	0.904096	0.0959041	2624
0000111000100010_0111	0.00198678	13909.9	237.496	-1.33021	0.906094	0.0939061	13594
0110111000010110_0111	1.46152e-07	4.463	2.60488	-1.32943	0.975025	0.024975	1
0100001010110011_0111	2.98149e-05	258.134	40.7451	-1.3286	0.917083	0.0829171	204
0100011110010000_0111	3.77071e-05	332.147	55.8851	-1.32678	0.918082	0.0819181	258
0011001001111100_0011	1.46152e-07	6.294	4.0067	-1.32129	0.975025	0.024975	1
0000000011010001_0011	0.00302797	21452.4	557.743	-1.31682	0.903097	0.0969031	20718
0100011110000100_0111	7.43912e-05	603.161	71.5407	-1.31619	0.911089	0.0889111	509
0011001010100000_0011	6.79605e-05	694.877	174.716	-1.31572	0.919081	0.0809191	465
0110111111110110_0111	1.46152e-07	10.898	7.53049	-1.31439	0.985015	0.014985	1
0100001000111011_0111	3.91686e-05	326.417	44.4468	-1.31431	0.915085	0.0849151	268
0011000011111000_0011	2.92303e-07	45.22	32.9183	-1.31295	0.971029	0.028971	2
0010000101111000_0011	3.36149e-06	42.068	14.5337	-1.31198	0.941059	0.0589411	23
0010000010011100_0011	1.47613e-05	256.399	118.492	-1.31147	0.92008	0.0799201	101
0100001011101101_0111	1.31536e-06	18.867	7.52622	-1.31102	0.944056	0.0559441	9
0010000011110101_0011	0.000104645	954.337	182.465	-1.30621	0.907093	0.0929071	716
0100100010101010_0111	6.86912e-06	168.113	92.7357	-1.306	0.97003	0.02997	47
0100101011101000_0111	3.94609e-06	96.559	53.2818	-1.30549	0.954046	0.045954	27
0000111011101110_0111	0.000179474	1310.46	63.2644	-1.3034	0.902098	0.0979021	1228
0110100000001111_0111	2.63073e-06	41.301	17.8772	-1.30339	0.929071	0.0709291	18
0010001000010010_0011	0.000528776	3828.43	161.525	-1.30277	0.893107	0.106893	3618
0010000101000011_0011	0.000145713	1235.7	183.322	-1.30209	0.911089	0.0889111	997
0100101011101001_0111	1.75382e-06	44.14	24.73	-1.29963	0.949051	0.0509491	12
0010001011001010_0011	1.46152e-07	12.186	8.61159	-1.29895	0.975025	0.024975	1
0110010100100101_0111	0.000297857	2252.32	165.223	-1.29718	0.906094	0.0939061	2038
0100011001010001_0111	0.000539299	3814.69	96.1909	-1.29631	0.903097	0.0969031	3690
0110010000010100_0111	5.21761e-05	390.024	25.4881	-1.29567	0.907093	0.0929071	357
0100000011111111_0111	1.91459e-05	219.515	68.3178	-1.29564	0.948052	0.0519481	131
0010000011110100_0011	0.00010026	931.081	189.411	-1.29391	0.909091	0.0909091	686
0100001010000011_0111	3.82917e-05	327.941	51	-1.29296	0.906094	0.0939061	262
0100000010111001_0111	3.74148e-05	398.712	110.418	-1.29247	0.939061	0.0609391	256
0110011101101000_0111	2.17766e-05	194.853	35.5333	-1.29043	0.911089	0.0889111	149
0000101000000010_0111	0.000670543	4742.67	119.977	-1.28916	0.901099	0.0989011	4588
0100001010110001_0111	3.36149e-05	290.824	47.1995	-1.28866	0.904096	0.0959041	230
0100101010101101_0111	8.7691e-07	26.067	15.5823	-1.28781	0.962038	0.037962	6
0000111101010010_0111	0.000203589	1442.78	38.6656	-1.28755	0.89011	0.10989	1393
0011001001000111_0011	4.96915e-06	70.85	28.6306	-1.28708	0.916084	0.0839161	34
0110010000000101_0111	0.000617052	4463.4	187.595	-1.2868	0.913087	0.0869131	4222
0010001010101100_0011	1.53459e-05	156.984	40.4237	-1.28598	0.908092	0.0919081	105
0010001011101000_0011	7.89219e-06	125.682	55.7443	-1.28591	0.939061	0.0609391	54
0110100001110001_0111	1.03768e-05	142.027	55.2478	-1.28561	0.916084	0.0839161	71
0011001110010011_0011	1.31536e-06	26.37	13.5171	-1.28504	0.931069	0.0689311	9
0110000100001100_0111	1.46152e-06	18.815	6.87809	-1.28161	0.932068	0.0679321	10
0110101101110011_0111	1.46152e-06	32.543	17.6255	-1.279	0.943057	0.0569431	10
0111111000110001_0111	2.92303e-07	7	3.91476	-1.27722	0.963037	0.036963	2
0110111111101001_0111	2.92303e-07	10.389	6.57091	-1.27669	0.956044	0.043956	2
0110100001111111_0111	1.46152e-06	29.369	15.1911	-1.27502	0.938062	0.0619381	10
0000101001101000_0111	0.000410686	2990.73	141.904	-1.27362	0.907093	0.0929071	2810
0111111001100000_0111	2.48458e-06	31.895	11.7059	-1.27243	0.939061	0.0609391	17
0010000101110000_0011	0.000178013	1518.63	236.313	-1.27217	0.917083	0.0829171	1218
0100011111100100_0111	3.60994e-05	293.157	36.2865	-1.27202	0.898102	0.101898	247
0100011110000101_0111	0.000146005	1160.93	127.429	-1.27073	0.89011	0.10989	999
0110011101111110_0111	3.06918e-06	36.349	12.0819	-1.27041	0.918082	0.0819181	21
0100011110110011_0111	7.04451e-05	596.282	90.3327	-1.26512	0.9001	0.0999001	482
0011001011110111_0011	4.38455e-07	13.007	7.91591	-1.26416	0.975025	0.024975	3
0011001000100001_0011	0.00117506	8685.47	510.756	-1.26375	0.902098	0.0979021	8040
0100000010001000_0111	0.000103183	949.97	193.135	-1.26321	0.906094	0.0939061	706
0100111101100100_0111	1.78305e-05	195.485	58.1922	-1.2628	0.917083	0.0829171	122
0100011111000010_0111	1.19844e-05	104.8	18.0824	-1.26089	0.911089	0.0889111	82
0111101001110011_0111	1.46152e-07	5.906	3.89208	-1.26051	0.952048	0.047952	1
0010000111110011_0011	1.79766e-05	185.144	49.319	-1.26004	0.909091	0.0909091	123
0011001000110001_0011	0.00145567	10531.7	453.783	-1.25996	0.907093	0.0929071	9960
0100100011101001_0111	5.84606e-06	115.548	60.01	-1.25892	0.944056	0.0559441	40
0000100001110111_0111	0.00229794	16188.3	369.739	-1.25843	0.895105	0.104895	15723
0110110100001111_0111	4.09224e-06	49.681	17.2664	-1.25567	0.91009	0.0899101	28
0100100010101000_0111	3.91686e-05	648.091	302.845	-1.25507	0.937063	0.0629371	268
0000101011001000_0111	9.23678e-05	690.223	46.4018	-1.25476	0.892108	0.107892	632
0110010101001110_0111	1.16921e-06	13.652	4.50502	-1.2546	0.919081	0.0809191	8
0100101110110011_0111	4.38455e-06	73.805	34.9301	-1.25407	0.904096	0.0959041	30
0010000011101000_0011	0.000131536	1396.93	396.552	-1.25314	0.899101	0.100899	900
0100001101000100_0111	7.45373e-06	58.945	6.34699	-1.25177	0.911089	0.0889111	51
0100011111001011_0111	5.11531e-06	53.102	14.5066	-1.24784	0.91009	0.0899101	35
0100011001010110_0111	0.000160767	1127.81	22.288	-1.2478	0.891109	0.108891	1100
0110111101000111_0111	2.63073e-06	42.541	19.6774	-1.24716	0.919081	0.0809191	18
0011001000111000_0011	1.81228e-05	232.974	87.4025	-1.24681	0.909091	0.0909091	124
0010000001011011_0011	4.22378e-05	427.954	111.451	-1.24677	0.922078	0.0779221	289
0100100001010010_0111	5.40761e-06	66.713	23.8471	-1.24598	0.903097	0.0969031	37
0100011001000100_0111	0.000670251	4706.27	96.5415	-1.24584	0.876124	0.123876	4586
0100001011001100_0111	5.84606e-07	9.314	4.26821	-1.24502	0.94006	0.0599401	4
0110011000111010_0111	2.33843e-06	24.461	6.81123	-1.24221	0.922078	0.0779221	16
0100011111010111_0111	6.53298e-05	544.676	78.6663	-1.24165	0.9001	0.0999001	447
0110101001110111_0111	2.48458e-06	45.544	23.0006	-1.24101	0.93007	0.0699301	17
0100111101010100_0111	1.2569e-05	129.09	34.7721	-1.23921	0.898102	0.101898	86
0000111101000001_0111	0.000680189	4800.17	118.004	-1.23868	0.888112	0.111888	4654
0010001011101010_0011	1.75382e-06	31.554	15.8049	-1.23721	0.941059	0.0589411	12
0100011111110010_0111	5.26146e-05	425.538	52.9783	-1.23707	0.891109	0.108891	360
0100001011101010_0111	7.01528e-06	77.052	23.4886	-1.23686	0.933067	0.0669331	48
0100011000000011_0111	0.000617929	4356.19	103.739	-1.23569	0.881119	0.118881	4228
0100100011101100_0111	1.60767e-06	46.337	28.6261	-1.23443	0.947053	0.0529471	11
0000111001011110_0111	4.16532e-05	310.465	20.671	-1.23192	0.896104	0.103896	285
0110001100010000_0111	3.43456e-05	273.716	31.4441	-1.23126	0.896104	0.103896	235
0100010010010110_0111	2.44073e-05	194.438	22.3165	-1.22949	0.903097	0.0969031	167
0100100001000010_0111	5.99222e-06	83.121	34.3007	-1.22799	0.894106	0.105894	41
0110011100001101_0111	1.24229e-05	112.577	22.4594	-1.22786	0.904096	0.0959041	85
0000111011011010_0111	4.51608e-05	335.46	21.5611	-1.22721	0.891109	0.108891	309
0100011111111011_0111	2.95226e-05	280.383	63.9773	-1.22517	0.91009	0.0899101	202
0110111110001000_0111	5.84606e-07	17.947	11.3925	-1.22422	0.934066	0.0659341	4
0100111001111001_0111	1.78305e-05	172.426	41.2285	-1.22309	0.894106	0.105894	122
0010000110011001_0011	1.7392e-05	260.334	115.578	-1.22285	0.918082	0.0819181	119
0110010000011111_0111	4.96915e-06	49.159	12.4229	-1.22025	0.91009	0.0899101	34
0111011101110101_0111	8.59371e-05	684.807	79.4121	-1.21905	0.897103	0.102897	588
0100011001010111_0111	0.000580368	4061.6	74.3198	-1.219	0.898102	0.101898	3971
0100011110101000_0111	4.15071e-05	417.345	109.42	-1.21865	0.918082	0.0819181	284
0100100011111001_0111	1.06691e-05	215.789	117.17	-1.21864	0.934066	0.0659341	73
0110100001010110_0111	2.92303e-07	6.355	3.57628	-1.21775	0.93007	0.0699301	2
0100011001000011_0111	0.000174651	1233.32	31.471	-1.21769	0.886114	0.113886	1195
0000111101100010_0111	0.000464908	3280.65	81.8534	-1.21742	0.887113	0.112887	3181
0100001010011111_0111	2.04612e-06	24.462	8.59398	-1.21736	0.922078	0.0779221	14
0110011001010010_0111	5.99222e-06	50.83	8.07554	-1.21726	0.897103	0.102897	41
0111111101010000_0111	1.46152e-07	5.348	3.57739	-1.21541	0.974026	0.025974	1
0110101001111011_0111	1.46152e-07	7.484	5.34212	-1.21375	0.962038	0.037962	1
0111101001110000_0111	1.46152e-07	6.561	4.58534	-1.21278	0.972028	0.027972	1
0100111101010110_0111	3.06918e-06	33.25	10.1134	-1.21126	0.898102	0.101898	21
0100011111101100_0111	7.30758e-06	77.856	23.0113	-1.21054	0.915085	0.0849151	50
0111111000000010_0111	1.46152e-07	4.505	2.90145	-1.20802	0.961039	0.038961	1
0100101011111001_0111	2.48458e-06	53.263	30.0209	-1.20792	0.926074	0.0739261	17
0110111111111101_0111	4.38455e-07	14.411	9.44708	-1.20789	0.95005	0.04995	3
0100000011011100_0111	3.06918e-06	39.993	15.7274	-1.20763	0.932068	0.0679321	21
0110111001000011_0111	2.92303e-07	7.331	4.41984	-1.20615	0.954046	0.045954	2
0110101101111011_0111	1.46152e-07	7.601	5.47538	-1.20558	0.957043	0.042957	1
0100001010010011_0111	7.45373e-06	66.735	13.0637	-1.20449	0.904096	0.0959041	51
0000110011011010_0111	6.15298e-05	455.333	28.5292	-1.20343	0.886114	0.113886	421
0110111101101011_0111	7.30758e-07	11.778	5.63227	-1.20342	0.928072	0.0719281	5
0011001010010011_0011	7.30758e-06	123.493	61.0807	-1.20321	0.906094	0.0939061	50
0110110001001010_0111	1.46152e-07	4.982	3.30978	-1.2031	0.961039	0.038961	1
0010001000111001_0011	0.000469585	3715.7	417.868	-1.20302	0.893107	0.106893	3213
0110110000111100_0111	1.46152e-07	4.462	2.87799	-1.20292	0.955045	0.044955	1
0110011001101111_0111	5.11531e-06	52.866	14.8557	-1.20263	0.902098	0.0979021	35
0000111101000100_0111	0.000244512	1740.63	56.2385	-1.20256	0.899101	0.100899	1673
0000111110100110_0111	0.000455262	3286.51	142.771	-1.2013	0.893107	0.106893	3115
0100000010110010_0111	7.9068e-05	639.39	82.1111	-1.19825	0.883117	0.116883	541
0100110011101001_0111	1.19844e-05	154.176	60.2558	-1.19783	0.892108	0.107892	82
0100101110110010_0111	1.31536e-06	23.336	11.979	-1.19676	0.904096	0.0959041	9
0000111001110101_0111	0.000641167	4499.46	93.974	-1.19667	0.888112	0.111888	4387
0111101000100010_0111	5.84606e-07	11.964	6.65515	-1.19667	0.947053	0.0529471	4
0100001001010101_0111	8.59371e-05	615.454	22.9467	-1.19642	0.895105	0.104895	588
0110101100110011_0111	2.33843e-06	38.977	19.2496	-1.19364	0.903097	0.0969031	16
0110101001110001_0111	2.63073e-06	40.436	18.8116	-1.19267	0.902098	0.0979021	18
0110100001111101_0111	4.38455e-07	12.23	7.74216	-1.19217	0.951049	0.048951	3
0100010001110111_0111	0.00186051	13047.6	266.471	-1.19206	0.881119	0.118881	12730
0100110011111001_0111	1.21306e-05	199.227	97.5686	-1.19123	0.93007	0.0699301	83
0100101010011001_0111	4.38455e-07	13.488	8.80519	-1.19112	0.966034	0.033966	3
0100101010111001_0111	2.48458e-06	47.709	25.8365	-1.18859	0.936064	0.0639361	17
0100011110110001_0111	0.00011736	942.054	116.995	-1.18854	0.89011	0.10989	803
0100000011111011_0111	3.3761e-05	327.739	81.4733	-1.18737	0.905095	0.0949051	231
0100001000101011_0111	0.000109175	865.724	100.045	-1.18671	0.888112	0.111888	747
0111011000000001_0111	4.99838e-05	393.684	43.5599	-1.1865	0.892108	0.107892	342
0110011100100001_0111	0.000532869	3833.43	158.05	-1.18589	0.887113	0.112887	3646
0000111110100011_0111	0.000502031	3615.75	152.474	-1.18544	0.88012	0.11988	3435
0110000000001101_0111	2.16304e-05	195.658	40.2332	-1.18454	0.891109	0.108891	148
0100101011101111_0111	1.31536e-06	36.298	23.0463	-1.18448	0.947053	0.0529471	9
0010000010011111_0011	1.75382e-05	251.666	111.192	-1.18413	0.894106	0.105894	120
0110010100011010_0111	1.46152e-07	3.623	2.21625	-1.18353	0.953047	0.046953	1
0111100001000000_0111	5.84606e-07	11.456	6.30427	-1.18269	0.926074	0.0739261	4
0110111101010111_0111	5.11531e-06	64.245	24.7862	-1.17989	0.892108	0.107892	35
0000111000111000_0111	0.000418724	3011.44	124.141	-1.17962	0.887113	0.112887	2865
0110011100100110_0111	0.000302241	2190.86	104.388	-1.17699	0.886114	0.113886	2068
0111111001110000_0111	1.31536e-06	18.223	7.83982	-1.17643	0.918082	0.0819181	9
0110001100010101_0111	1.69536e-05	136.987	17.8665	-1.17466	0.892108	0.107892	116
0000111010110100_0111	5.72914e-05	424.198	27.4224	-1.17415	0.885115	0.114885	392
0100011001100011_0111	0.000614567	4302.38	83.0111	-1.17304	0.886114	0.113886	4205
0100110010110010_0111	5.26146e-06	84.56	41.4214	-1.17234	0.932068	0.0679321	36
0110100000001110_0111	7.30758e-07	12.515	6.41068	-1.17226	0.922078	0.0779221	5
0110111101000011_0111	5.84606e-07	10.29	5.36961	-1.17141	0.941059	0.0589411	4
0110101101110000_0111	1.16921e-06	29.285	18.1774	-1.17096	0.927073	0.0729271	8
0111111000100010_0111	1.02306e-06	14.606	6.50146	-1.16989	0.906094	0.0939061	7
0010000111110000_0011	1.19844e-05	123.419	35.4404	-1.1687	0.888112	0.111888	82
0100001011111010_0111	8.03834e-06	83.462	24.3693	-1.16794	0.908092	0.0919081	55
0100011111000100_0111	2.52842e-05	210.498	32.1451	-1.16652	0.88012	0.11988	173
0011001011100101_0011	2.92303e-07	8.349	5.44967	-1.16502	0.949051	0.0509491	2
0010000010101110_0011	3.7561e-05	384.373	109.348	-1.16484	0.892108	0.107892	257
0110001000010100_0111	2.63073e-06	23.2	4.46474	-1.16468	0.902098	0.0979021	18
0011001010101111_0011	1.46152e-07	5.897	4.21048	-1.16305	0.941059	0.0589411	1
0110011100110010_0111	0.000103329	763.357	48.458	-1.16301	0.884116	0.115884	707
0100011110000000_0111	0.000255473	2033.58	245.655	-1.16254	0.881119	0.118881	1748
0100100010001000_0111	3.50764e-05	496.196	220.612	-1.1613	0.895105	0.104895	240
0110100100001011_0111	4.38455e-07	8.312	4.57882	-1.16012	0.925075	0.0749251	3
0110111101010000_0111	3.50764e-06	46.988	19.818	-1.15995	0.897103	0.102897	24
0110101000001010_0111	2.92303e-07	7.95	5.13028	-1.15978	0.922078	0.0779221	2
0011001000110011_0011	0.00190436	13769.3	637.968	-1.1589	0.89011	0.10989	13030
0110110100000101_0111	1.82689e-05	180.753	48.1148	-1.15875	0.882118	0.117882	125
0100110011001001_0111	9.20755e-06	126.07	54.4972	-1.15731	0.896104	0.103896	63
0111101100110001_0111	1.46152e-07	7.653	5.74923	-1.1572	0.97003	0.02997	1
0100101010101000_0111	1.08152e-05	207.083	115.076	-1.15648	0.934066	0.0659341	74
0100011111010101_0111	4.64762e-05	389.3	61.6617	-1.15631	0.88012	0.11988	318
0100011001110011_0111	0.000832333	5838.72	124.312	-1.1561	0.878122	0.121878	5695
0000111010111001_0111	0.000346818	2499.1	109.293	-1.15376	0.881119	0.118881	2373
0111011001010000_0111	1.40306e-05	115.607	17.0036	-1.15311	0.884116	0.115884	96
0100101011011001_0111	1.46152e-07	11.4	9.01917	-1.1531	0.97003	0.02997	1
0100001011001111_0111	1.16921e-06	15.855	6.82059	-1.15166	0.914086	0.0859141	8
0110111001110011_0111	3.21533e-06	40.174	15.7855	-1.15131	0.89011	0.10989	22
0100001010000100_0111	1.65151e-05	141.556	24.8045	-1.15124	0.87013	0.12987	113
0110111100000011_0111	3.36149e-06	43.567	17.8666	-1.15114	0.909091	0.0909091	23
0000101101010001_0111	0.000324895	2294.11	61.8177	-1.15024	0.873127	0.126873	2223
0011000011010111_0011	2.33843e-06	36.14	17.5105	-1.15017	0.905095	0.0949051	16
0100001010010010_0111	8.47679e-06	72.647	12.7428	-1.14943	0.888112	0.111888	58
0100000011111000_0111	6.73759e-05	623.053	141.086	-1.14861	0.898102	0.101898	461
0011000011110001_0011	4.26763e-05	441.991	130.637	-1.14815	0.898102	0.101898	292
0100001011100110_0111	1.24229e-05	106.785	18.9978	-1.14671	0.88012	0.11988	85
0110011001101110_0111	2.77688e-06	30.43	9.99845	-1.14318	0.898102	0.101898	19
0011000011110010_0011	1.30075e-05	169.595	70.5859	-1.1418	0.892108	0.107892	89
0110100101100110_0111	1.46152e-07	4.887	3.40585	-1.14127	0.954046	0.045954	1
0000111011001011_0111	8.50602e-05	614.049	28.0842	-1.14117	0.88012	0.11988	582
0110100000001001_0111	7.01528e-06	84.592	32.0673	-1.1411	0.885115	0.114885	48
0110110101111001_0111	1.46152e-06	20.176	8.92528	-1.14013	0.903097	0.0969031	10
0110101001110110_0111	5.84606e-07	14.026	8.80527	-1.13864	0.924076	0.0759241	4
0010000110001001_0011	6.48913e-05	720.957	243.334	-1.13818	0.876124	0.123876	444
0110010000001111_0111	2.63073e-05	226.858	41.1903	-1.1376	0.89011	0.10989	180
0110101101111000_0111	1.46152e-07	8.277	6.40838	-1.13554	0.945055	0.0549451	1
0110110110001100_0111	2.92303e-07	7.758	5.07614	-1.13433	0.937063	0.0629371	2
0011001011110000_0011	1.16921e-06	20.123	10.6947	-1.13355	0.911089	0.0889111	8
0100000011101100_0111	1.02306e-05	105.317	31.1721	-1.13297	0.884116	0.115884	70
0110110001001011_0111	2.92303e-07	6.321	3.81819	-1.13169	0.923077	0.0769231	2
0110100101000001_0111	1.46152e-07	10.732	8.61571	-1.12956	0.956044	0.043956	1
0010000001001010_0011	2.77688e-05	292.952	91.1485	-1.1295	0.887113	0.112887	190
0011001000111010_0011	8.62294e-06	128.75	61.7588	-1.12939	0.876124	0.123876	59
0110111000001110_0111	4.38455e-07	7.649	4.1232	-1.12752	0.918082	0.0819181	3
0100101011011011_0111	2.92303e-07	10.168	7.24515	-1.12737	0.92008	0.0799201	2
0110111100100011_0111	7.74603e-06	84.147	27.6359	-1.12705	0.882118	0.117882	53
0110011101000111_0111	0.000149513	1116.58	83.2512	-1.12407	0.885115	0.114885	1023
0010000001110101_0011	0.00279866	20073.8	823.173	-1.12345	0.873127	0.126873	19149
0100011001110001_0111	0.00118807	8318.44	168.787	-1.12233	0.863137	0.136863	8129
0100100011001001_0111	5.55376e-06	94.488	50.3425	-1.12207	0.913087	0.0869131	38
0010000011011010_0011	8.7691e-07	39.773	30.1331	-1.12079	0.921079	0.0789211	6
0100001010011011_0111	1.16921e-06	15.956	7.11032	-1.11894	0.924076	0.0759241	8
0010001011111001_0011	4.38455e-06	70.348	36.0803	-1.11828	0.918082	0.0819181	30
0110110101111011_0111	5.84606e-07	9.212	4.66141	-1.11812	0.908092	0.0919081	4
0100100010011000_0111	1.27152e-05	184.136	86.9062	-1.11771	0.877123	0.122877	87
0100011110100010_0111	5.56838e-05	454.111	65.4228	-1.11752	0.87013	0.12987	381
0110111100000100_0111	5.55376e-06	61.818	21.3283	-1.11673	0.886114	0.113886	38
0100000010110000_0111	0.000235743	1827.98	192.568	-1.1164	0.861139	0.138861	1613
0000111000000010_0111	0.000919732	6436.65	128.68	-1.11634	0.876124	0.123876	6293
0100010001000011_0111	0.000450731	3175.33	81.8524	-1.11579	0.873127	0.126873	3084
0110111111101110_0111	1.46152e-07	5.863	4.36271	-1.11467	0.923077	0.0769231	1
0110100001000111_0111	1.16921e-06	22.757	13.2512	-1.11363	0.885115	0.114885	8
0100011011101001_0111	2.45535e-05	219.157	45.9516	-1.11328	0.873127	0.126873	168
0100001101100110_0111	0.000127298	902.926	28.6959	-1.11256	0.876124	0.123876	871
0110101001100010_0111	1.75382e-06	25.138	11.8093	-1.11252	0.898102	0.101898	12
0110111000011001_0111	2.92303e-07	5.699	3.32618	-1.11209	0.936064	0.0639361	2
0000101101100110_0111	0.000165736	1180.18	41.5408	-1.11175	0.865135	0.134865	1134
0010000001010000_0011	0.00154979	11363.4	683.875	-1.11043	0.855145	0.144855	10604
0110111111111001_0111	5.84606e-07	14.333	9.31154	-1.1097	0.913087	0.0869131	4
0110011100110000_0111	0.000287334	2087.89	109.892	-1.10918	0.874126	0.125874	1966
0000101100100000_0111	0.00136476	9684.2	312.161	-1.10903	0.865135	0.134865	9338
0100110011011010_0111	7.30758e-07	12.13	6.43557	-1.10791	0.906094	0.0939061	5
0100001001001001_0111	9.0614e-06	80.052	16.317	-1.10633	0.875125	0.124875	62
0110100000001010_0111	1.89997e-06	25.643	11.4324	-1.10589	0.887113	0.112887	13
0011001001001111_0011	1.46152e-07	4.799	3.43954	-1.10451	0.946054	0.0539461	1
0100101010111011_0111	2.04612e-06	43.666	26.8634	-1.10433	0.933067	0.0669331	14
0100101110101001_0111	1.46152e-07	30.028	26.3016	-1.10366	0.998002	0.001998	1
0000111100100000_0111	0.00321446	22479.3	442.658	-1.09641	0.852148	0.147852	21994
0111111111100000_0111	1.46152e-07	4.999	3.65189	-1.09505	0.94006	0.0599401	1
0110101001111000_0111	7.30758e-07	15.117	9.24114	-1.09478	0.901099	0.0989011	5
0100001001101101_0111	7.30758e-06	65.929	14.5692	-1.09333	0.876124	0.123876	50
0000000000001110_0001	0.00634239	44785.1	1270.9	-1.09298	0.858142	0.141858	43396
0010001000111011_0011	0.000741135	5708.16	583.575	-1.09182	0.861139	0.138861	5071
0110001000011101_0111	2.92303e-07	5.198	2.93316	-1.09029	0.922078	0.0779221	2
0110001000010111_0111	1.94382e-05	156.037	21.1297	-1.09026	0.885115	0.114885	133
0100000010110110_0111	3.94609e-05	313.518	39.9204	-1.09012	0.861139	0.138861	270
0110011001001110_0111	1.31536e-06	14.914	5.42716	-1.0897	0.887113	0.112887	9
0100010001100010_0111	0.000912278	6397.01	142.26	-1.08963	0.856144	0.143856	6242
0010001010001110_0011	1.60767e-06	22.431	10.4927	-1.08942	0.876124	0.123876	11
0000110010001000_0111	0.00243445	17258.6	552.287	-1.0892	0.868132	0.131868	16657
0011001000000101_0011	7.30758e-05	599.044	91.0014	-1.08838	0.875125	0.124875	500
0110101000001001_0111	8.7691e-07	16.824	9.94605	-1.08827	0.887113	0.112887	6
0100001011001101_0111	4.38455e-07	7.487	4.12539	-1.08765	0.913087	0.0869131	3
0010000111010100_0011	1.46152e-07	5.916	4.52099	-1.08737	0.938062	0.0619381	1
0110101100101001_0111	5.84606e-07	13.071	8.34299	-1.08726	0.902098	0.0979021	4
0100011001100100_0111	0.00103738	7248.72	138.7	-1.08663	0.858142	0.141858	7098
0011001010010000_0011	1.02306e-05	147.18	71.1422	-1.08487	0.857143	0.142857	70
0010000001001011_0011	9.80677e-05	901.761	212.713	-1.08485	0.873127	0.126873	671
0000101000101000_0111	0.00105156	7563.84	340.096	-1.08451	0.869131	0.130869	7195
0110011000011010_0111	1.46152e-07	3.028	1.87049	-1.08421	0.943057	0.0569431	1
0000111001000101_0111	0.000365379	2565.97	60.8698	-1.08385	0.856144	0.143856	2500
0100100011111010_0111	6.57682e-06	99.32	50.2216	-1.08161	0.861139	0.138861	45
0110010100000000_0111	0.000707081	5052.14	198.126	-1.08082	0.859141	0.140859	4838
0000111001110000_0111	0.00283096	19735.5	338.245	-1.08063	0.855145	0.144855	19370
0100011111100110_0111	5.67068e-05	441.991	49.9644	-1.08059	0.865135	0.134865	388
0010000111110100_0011	1.46152e-06	20.513	9.73348	-1.08009	0.886114	0.113886	10
0110111110000000_0111	1.60767e-06	33.946	21.2468	-1.07998	0.882118	0.117882	11
0100001000010001_0111	0.000249042	1768.04	59.3606	-1.0789	0.859141	0.140859	1704
0100100001000011_0111	7.59988e-06	94.949	39.8793	-1.07698	0.867133	0.132867	52
0000111011101000_0111	0.000788342	5618.94	208.867	-1.07695	0.864136	0.135864	5394
0100111000101100_0111	1.00845e-05	100.845	29.576	-1.07672	0.861139	0.138861	69
0100000011001011_0111	6.86912e-06	69.149	20.5744	-1.07653	0.873127	0.126873	47
0010000101110011_0011	0.000337026	2674.94	342.968	-1.07572	0.855145	0.144855	2306
0100101011011000_0111	4.38455e-07	18.327	14.254	-1.07528	0.945055	0.0549451	3
0111111001000000_0111	8.7691e-07	12.09	5.66586	-1.07486	0.898102	0.101898	6
0100001011110000_0111	8.21372e-05	652.248	83.9731	-1.07473	0.859141	0.140859	562
0000111000101110_0111	0.000328841	2381.54	122.594	-1.07299	0.861139	0.138861	2250
0100011111101011_0111	9.0614e-06	88.307	24.5248	-1.07267	0.887113	0.112887	62
0110111100001111_0111	3.65379e-06	44.13	17.8353	-1.07259	0.87013	0.12987	25
0100111010010010_0111	1.02306e-06	12.096	4.75114	-1.07258	0.886114	0.113886	7
0010000111100110_0011	7.30758e-07	12.279	6.78684	-1.07252	0.888112	0.111888	5
0111010001010000_0111	4.64762e-05	361.922	41.0228	-1.07067	0.865135	0.134865	318
0110101001100110_0111	1.02306e-06	16.118	8.5206	-1.07011	0.885115	0.114885	7
0110110101101000_0111	1.02306e-06	14.482	6.9959	-1.06948	0.889111	0.110889	7
0111001100010000_0111	4.38455e-06	41.824	11.0623	-1.06885	0.893107	0.106893	30
0100101010101001_0111	6.13837e-06	103.086	57.1727	-1.06845	0.889111	0.110889	42
0111011100100000_0111	0.000111221	827.839	62.5586	-1.06842	0.863137	0.136863	761
0110111110010001_0111	7.30758e-07	16.292	10.5712	-1.06818	0.898102	0.101898	5
0110111100001011_0111	8.7691e-07	14.385	7.85089	-1.06803	0.908092	0.0919081	6
0110110101110100_0111	2.04612e-06	25.093	10.3865	-1.06802	0.885115	0.114885	14
0010000001101101_0011	0.000158721	1241.4	145.735	-1.06634	0.847153	0.152847	1086
0111101000000011_0111	1.46152e-07	4.29	3.086	-1.0661	0.931069	0.0689311	1
0100001100110000_0111	0.00088334	6202.99	149.146	-1.06602	0.87013	0.12987	6044
0100011001100101_0111	0.0005279	3689.55	72.8045	-1.0652	0.846154	0.153846	3612
0011001000001100_0011	3.21533e-06	38.593	15.5775	-1.06519	0.881119	0.118881	22
0110011101000110_0111	4.89608e-05	367.889	30.9204	-1.06367	0.865135	0.134865	335
0110101100000001_0111	2.48458e-06	43.287	24.7197	-1.0634	0.865135	0.134865	17
0100011011000111_0111	4.17994e-05	336.991	47.9754	-1.06286	0.858142	0.141858	286
0000101101100010_0111	0.000205051	1454.67	48.6239	-1.06269	0.857143	0.142857	1403
0110100001110101_0111	3.21533e-06	43.53	20.2901	-1.06111	0.873127	0.126873	22
0110010000011010_0111	8.7691e-07	10.792	4.5161	-1.06109	0.879121	0.120879	6
0110101101111001_0111	4.38455e-07	10.241	6.82506	-1.06094	0.917083	0.0829171	3
0100001010100111_0111	5.94837e-05	479.832	68.6903	-1.06029	0.848152	0.151848	407
0000111110110110_0111	0.000212943	1529.93	68.8217	-1.05975	0.858142	0.141858	1457
0100101010110100_0111	2.92303e-07	5.327	3.13942	-1.05975	0.909091	0.0909091	2
0011001000100100_0011	7.70219e-05	624.786	92.2894	-1.05956	0.872128	0.127872	527
0110110000001010_0111	2.33843e-06	27.828	11.1654	-1.05934	0.861139	0.138861	16
0110000100001011_0111	5.55376e-06	51.789	13.0198	-1.05908	0.876124	0.123876	38
0000111111101011_0111	0.000349595	2506.88	108.585	-1.05793	0.849151	0.150849	2392
0110111100010010_0111	1.46152e-07	4.288	3.10946	-1.05742	0.925075	0.0749251	1
0011001001101101_0011	7.30758e-07	11.045	5.71766	-1.05725	0.893107	0.106893	5
0010001000001001_0011	0.000569553	4507.76	578.059	-1.05658	0.855145	0.144855	3897
0010001010011100_0011	8.7691e-07	25.457	18.4158	-1.05654	0.923077	0.0769231	6
0011000001010011_0011	0.000155213	1216.94	146.732	-1.05593	0.86014	0.13986	1062
0100001011011101_0111	4.38455e-07	6.889	3.68324	-1.05586	0.91009	0.0899101	3
0100001111010010_0111	1.89997e-06	18.72	5.42411	-1.05455	0.866134	0.133866	13
0100011110100110_0111	6.51836e-05	515.27	65.6978	-1.05437	0.861139	0.138861	446
0100011010101101_0111	1.2569e-05	111.999	24.659	-1.05434	0.864136	0.135864	86
0110001100000100_0111	2.01689e-05	155.551	16.6614	-1.05339	0.865135	0.134865	138
0110010000010101_0111	0.000121306	882.241	49.6184	-1.05286	0.858142	0.141858	830
0110101101110111_0111	2.48458e-06	37.486	19.4614	-1.05265	0.875125	0.124875	17
0010000111100100_0011	3.50764e-06	41.493	16.6202	-1.05251	0.877123	0.122877	24
0110111000101100_0111	8.7691e-07	11.992	5.69336	-1.05245	0.897103	0.102897	6
0100100001110110_0111	2.07535e-05	241.427	94.5266	-1.05184	0.847153	0.152847	142
0100011001110111_0111	0.0024704	17179.4	263.215	-1.05026	0.854146	0.145854	16903
0011000010110100_0011	6.43067e-06	88.216	42.171	-1.04849	0.888112	0.111888	44
0000111001010101_0111	0.000480693	3350.56	58.7224	-1.04836	0.854146	0.145854	3289
0110100001010100_0111	5.84606e-07	10.054	5.77862	-1.04765	0.885115	0.114885	4
0100111110010100_0111	2.63073e-06	28.413	9.93988	-1.0476	0.864136	0.135864	18
0110100001101010_0111	4.38455e-07	8.574	5.32267	-1.04722	0.907093	0.0929071	3
0100101010101111_0111	5.55376e-06	87.156	46.9397	-1.04722	0.858142	0.141858	38
0010001010001111_0011	4.5307e-06	52.633	20.6639	-1.0469	0.854146	0.145854	31
0100101010110010_0111	4.96915e-06	58.308	23.261	-1.04501	0.854146	0.145854	34
0100011110110110_0111	3.47841e-05	273.578	34.0498	-1.04488	0.861139	0.138861	238
0000101101110000_0111	0.0009817	6968.97	241.168	-1.04479	0.842158	0.157842	6717
0100001001001111_0111	6.43067e-06	56.388	11.8658	-1.04401	0.859141	0.140859	44
0010001010011101_0011	2.77688e-06	37.449	17.6791	-1.04355	0.884116	0.115884	19
0100101110110001_0111	7.16143e-06	93.572	42.7139	-1.0435	0.86014	0.13986	49
0001000000001111_0001	0.000744204	6640.42	1484.52	-1.04304	0.843157	0.156843	5092
0110100000001000_0111	1.27152e-05	135.145	46.1638	-1.04292	0.842158	0.157842	87
0110111100001110_0111	7.30758e-07	11.176	5.92268	-1.04277	0.898102	0.101898	5
0000111000100110_0111	0.00140759	9805.42	167.561	-1.04093	0.855145	0.144855	9631
0110011101110100_0111	0.000169097	1241.42	81.2247	-1.03929	0.85015	0.14985	1157
0100100001010001_0111	3.5661e-05	379.453	130.374	-1.03895	0.853147	0.146853	244
0100101011001000_0111	8.7691e-07	24.015	17.3781	-1.03665	0.919081	0.0809191	6
0100101010001001_0111	5.84606e-06	92.786	50.9238	-1.03657	0.884116	0.115884	40
0100100011101010_0111	3.94609e-06	59.589	31.456	-1.03602	0.867133	0.132867	27
0000111001100110_0111	0.00101298	7069.38	133.621	-1.03563	0.855145	0.144855	6931
0110110000001001_0111	6.86912e-06	73.005	25.1421	-1.03432	0.862138	0.137862	47
0110000100001000_0111	1.70997e-05	151.876	33.7277	-1.03405	0.851149	0.148851	117
0100011011010010_0111	6.86912e-06	59.582	12.1755	-1.03338	0.867133	0.132867	47
0100000010010011_0111	6.19683e-05	494.858	68.5907	-1.03306	0.851149	0.148851	424
0110101001101000_0111	1.16921e-06	19.069	10.7186	-1.03269	0.874126	0.125874	8
0100001010111001_0111	9.3537e-06	89.965	25.171	-1.03154	0.878122	0.121878	64
0010001000100011_0011	0.00559132	39224.2	938.184	-1.03097	0.849151	0.150849	38257
0110100010001101_0111	1.46152e-07	10.589	9.30681	-1.03032	0.902098	0.0979021	1
0111101000000010_0111	1.46152e-07	4.536	3.43198	-1.03031	0.938062	0.0619381	1
0110111101110010_0111	4.38455e-06	46.264	15.7914	-1.02992	0.86014	0.13986	30
0100111000111111_0111	1.00845e-05	99.133	29.2642	-1.02969	0.856144	0.143856	69
0100101000101101_0111	3.21533e-06	38.382	15.9234	-1.0288	0.853147	0.146853	22
0110111011000100_0111	1.46152e-07	6.289	5.14159	-1.02867	0.873127	0.126873	1
0100100011011100_0111	7.30758e-07	16.767	11.4474	-1.02792	0.926074	0.0739261	5
0100111101000010_0111	5.69991e-06	54.883	15.4545	-1.02773	0.863137	0.136863	39
0100101101000011_0111	4.38455e-07	8.244	5.10456	-1.02732	0.886114	0.113886	3
0100011110110010_0111	2.65996e-05	223.857	40.8413	-1.02487	0.863137	0.136863	182
0011001011100100_0011	5.84606e-07	10.168	6.02379	-1.02394	0.903097	0.0969031	4
0011000011111001_0011	3.06918e-06	61.572	39.6259	-1.02388	0.872128	0.127872	21
0100101011100101_0111	7.30758e-07	12.628	7.45139	-1.0237	0.858142	0.141858	5
0110100110001001_0111	1.46152e-07	7.849	6.69081	-1.02364	0.899101	0.100899	1
0110010100100011_0111	0.000135044	996.867	71.214	-1.02321	0.841159	0.158841	924
0110111001001000_0111	2.19227e-06	27.525	12.2417	-1.02314	0.876124	0.123876	15
0100000011001100_0111	3.94609e-06	43.85	16.4733	-1.02286	0.857143	0.142857	27
0100101010110000_0111	8.33064e-06	89.808	32.1145	-1.02159	0.857143	0.142857	57
0110011101111000_0111	1.13998e-05	102.804	24.2989	-1.02079	0.852148	0.147852	78
0011001110100000_0011	1.50536e-05	141.862	38.1059	-1.01984	0.855145	0.144855	103
0100111011111011_0111	8.62294e-06	90.426	30.8241	-1.01953	0.848152	0.151848	59
0100001001101010_0111	2.55765e-05	207.459	31.8441	-1.01931	0.843157	0.156843	175
0110111100001000_0111	4.2384e-06	52.15	22.7322	-1.01838	0.861139	0.138861	29
0100111000111100_0111	1.75382e-06	19.109	6.98426	-1.01786	0.867133	0.132867	12
0011001011111001_0011	1.46152e-07	5.486	4.40741	-1.01783	0.931069	0.0689311	1
0000111101110111_0111	0.00265455	18617.2	446.52	-1.01715	0.848152	0.151848	18163
0100101110100011_0111	5.11531e-06	64.586	29.0904	-1.01704	0.838162	0.161838	35
0000111001010111_0111	0.000571745	3987.65	74.4282	-1.01642	0.847153	0.152847	3912
0100100011011010_0111	5.84606e-07	11.893	7.76659	-1.01628	0.897103	0.102897	4
0110111111100010_0111	2.92303e-07	7.418	5.33289	-1.01596	0.902098	0.0979021	2
0100001000110001_0111	0.000593668	4166.81	103.185	-1.01574	0.863137	0.136863	4062
0110101001100011_0111	1.31536e-06	19.559	10.413	-1.01402	0.867133	0.132867	9
0000000011000011_0011	0.00645668	45394.7	1200.81	-1.01324	0.845155	0.154845	44178
0100001101100000_0111	0.000461108	3282.68	126.363	-1.01046	0.85015	0.14985	3155
0110001000001000_0111	1.4469e-05	130.47	31.17	-1.00963	0.85015	0.14985	99
0110100001110011_0111	8.62294e-06	97.282	38.0013	-1.00739	0.849151	0.150849	59
0100001000001011_0111	4.22378e-05	333.228	43.9065	-1.00732	0.846154	0.153846	289
0100111000001011_0111	9.20755e-06	86.706	23.577	-1.00547	0.856144	0.143856	63
0110101101110010_0111	5.84606e-07	10.491	6.45783	-1.00514	0.882118	0.117882	4
0000111000101100_0111	0.000283973	2040.81	97.5659	-1.00254	0.843157	0.156843	1943
0010000011100101_0011	0.000120575	1065.8	240.395	-1.00168	0.839161	0.160839	825
0100001010001101_0111	7.45373e-06	71.968	20.9399	-1.00134	0.858142	0.141858	51
0111110000010000_0111	7.30758e-07	11.221	6.221	-1	0.888112	0.111888	5
0100110011011001_0111	6.13837e-06	79.536	37.5374	-0.999962	0.844156	0.155844	42
0100001000101010_0111	9.80677e-05	768.461	97.5145	-0.999451	0.834166	0.165834	671
0000101010010101_0111	3.03995e-05	226.821	18.8545	-0.998223	0.845155	0.154845	208
0110101101111101_0111	1.46152e-07	4.256	3.26667	-0.996734	0.914086	0.0859141	1
0110110100000000_0111	2.3092e-05	212.926	55.1217	-0.996449	0.846154	0.153846	158
0110100001111100_0111	2.92303e-07	6.314	4.32968	-0.996378	0.905095	0.0949051	2
0111011000110001_0111	2.49919e-05	197.88	27.0029	-0.995449	0.842158	0.157842	171
0110111101010101_0111	5.40761e-06	60.889	24.0108	-0.994927	0.847153	0.152847	37
0110100000011001_0111	2.04612e-06	25.591	11.6836	-0.992075	0.861139	0.138861	14
0100011111111101_0111	2.65996e-05	241.096	59.5876	-0.991751	0.845155	0.154845	182
0110011101001011_0111	1.75382e-06	17.752	5.80225	-0.991339	0.862138	0.137862	12
0100100010111010_0111	5.40761e-06	93.969	57.492	-0.990903	0.873127	0.126873	37
0100001000000101_0111	0.000417117	2927.38	74.0985	-0.99029	0.837163	0.162837	2854
0100001010001111_0111	1.02306e-05	98.51	28.7949	-0.990104	0.862138	0.137862	70
0110111101010110_0111	7.30758e-07	9.329	4.37926	-0.988523	0.874126	0.125874	5
0110111111110100_0111	7.30758e-07	14.317	9.42748	-0.988281	0.874126	0.125874	5
0110100001100011_0111	2.48458e-06	30.817	13.9827	-0.988152	0.853147	0.146853	17
0110100001110000_0111	1.50536e-05	166.999	64.9501	-0.985357	0.829171	0.170829	103
0100101111011001_0111	1.46152e-07	11.842	11.0195	-0.983896	0.963037	0.036963	1
0100001100110011_0111	0.000478939	3363.09	87.4951	-0.983895	0.857143	0.142857	3277
0100011111000001_0111	6.85451e-05	540.909	73.1054	-0.983634	0.833167	0.166833	469
0111111100110011_0111	2.92303e-07	5.529	3.59445	-0.981791	0.903097	0.0969031	2
0100101110111011_0111	2.92303e-07	23.206	21.6147	-0.98109	0.982018	0.017982	2
0010000000111111_0011	0.00066572	4988.87	442.336	-0.980858	0.846154	0.153846	4555
0111011001000010_0111	3.21533e-06	28.427	6.55543	-0.980409	0.867133	0.132867	22
0110101101100110_0111	4.38455e-07	7.184	4.26806	-0.980304	0.886114	0.113886	3
0110110101100001_0111	2.92303e-06	32.343	12.5957	-0.979937	0.849151	0.150849	20
0011000011010100_0011	1.60767e-06	23.272	12.5261	-0.979715	0.859141	0.140859	11
0100100001010000_0111	4.2384e-05	424.599	137.511	-0.978821	0.828172	0.171828	290
0110011001100111_0111	0.000187805	1367.05	84.2905	-0.973407	0.834166	0.165834	1285
0100000010100011_0111	0.000158282	1227.17	148.166	-0.973033	0.83017	0.16983	1083
0100110010101010_0111	7.74603e-06	113.211	61.9082	-0.972585	0.92008	0.0799201	53
0110101100110110_0111	2.92303e-07	5.255	3.34801	-0.972219	0.886114	0.113886	2
0110111011101101_0111	1.46152e-07	4.215	3.30692	-0.972204	0.913087	0.0869131	1
0111101001100001_0111	1.46152e-07	3.833	2.91507	-0.971848	0.913087	0.0869131	1
0010000011100100_0011	0.000204174	1710.39	322.85	-0.970691	0.826174	0.173826	1397
0100111010110010_0111	5.26146e-06	51.474	15.9679	-0.969072	0.843157	0.156843	36
0110010000010001_0111	0.00028368	2060.63	123.559	-0.968233	0.844156	0.155844	1941
0100110010101000_0111	4.88146e-05	524.349	196.628	-0.968068	0.848152	0.151848	334
0110001100000001_0111	0.000209581	1545.52	115.303	-0.967158	0.832168	0.167832	1434
0010001000111010_0011	0.000223612	1779.01	258.008	-0.965142	0.838162	0.161838	1530
0100101011001001_0111	4.38455e-07	12.053	9.38116	-0.965019	0.892108	0.107892	3
0100111000111001_0111	9.646e-06	89.271	24.1257	-0.964575	0.841159	0.158841	66
0111111101110111_0111	2.04612e-06	26.071	12.5143	-0.964574	0.868132	0.131868	14
0000101101100000_0111	0.000613106	4369.23	180.834	-0.963483	0.829171	0.170829	4195
0110110000011001_0111	1.46152e-06	18.895	9.23825	-0.962844	0.869131	0.130869	10
0110000100011101_0111	3.79994e-06	36.398	10.8074	-0.962116	0.85015	0.14985	26
0111001100000000_0111	1.2569e-05	106.186	20.9832	-0.962007	0.843157	0.156843	86
0110110001111011_0111	1.31536e-06	17.395	8.74651	-0.959811	0.861139	0.138861	9
0000111101010011_0111	0.000481423	3356.77	65.5746	-0.957246	0.83017	0.16983	3294
0010000111101011_0011	2.92303e-06	32.979	13.5645	-0.956839	0.865135	0.134865	20
0111011001000011_0111	2.77688e-06	25.111	6.38823	-0.956603	0.854146	0.145854	19
0100111101110100_0111	3.1861e-05	298.833	84.5024	-0.956577	0.828172	0.171828	218
0110011000110110_0111	9.09063e-05	656.388	35.9853	-0.955611	0.827173	0.172827	622
0000101100100010_0111	0.000651105	4578.02	128.818	-0.954999	0.838162	0.161838	4455
0100011000000100_0111	0.00109365	7621.32	144.934	-0.954372	0.829171	0.170829	7483
0111100001100000_0111	1.46152e-06	20.5	11.0081	-0.953847	0.864136	0.135864	10
0100101000101001_0111	1.6369e-05	162.444	52.8994	-0.953583	0.832168	0.167832	112
0011000011010011_0011	7.89219e-06	111.755	60.6181	-0.952768	0.847153	0.152847	54
0011001000110111_0011	8.14064e-05	645.486	92.8755	-0.952738	0.824176	0.175824	557
0110110100001000_0111	6.72297e-06	66.671	21.7007	-0.952551	0.837163	0.162837	46
0110101100101101_0111	1.46152e-07	4.557	3.74149	-0.950691	0.9001	0.0999001	1
0100111001111011_0111	1.08152e-05	96.288	23.4555	-0.950224	0.849151	0.150849	74
0100101011011111_0111	4.38455e-07	11.256	8.6923	-0.949807	0.887113	0.112887	3
0010001010101010_0011	8.14064e-05	780.861	235.894	-0.948989	0.816184	0.183816	557
0100011111111001_0111	5.48068e-05	469.571	99.6805	-0.948741	0.843157	0.156843	375
0110111011101001_0111	2.92303e-07	6.315	4.5522	-0.947894	0.892108	0.107892	2
0100011100010010_0111	6.83989e-05	485.453	18.4211	-0.947446	0.836164	0.163836	468
0110011000011110_0111	1.46152e-07	2.987	2.1022	-0.9452	0.905095	0.0949051	1
0100100010111001_0111	1.38844e-05	224.78	137.312	-0.945144	0.852148	0.147852	95
0010000010011110_0011	3.36149e-06	52.862	31.6413	-0.943766	0.823177	0.176823	23
0110111111110000_0111	1.31536e-06	23.563	15.444	-0.942952	0.857143	0.142857	9
0011001010110000_0011	3.2738e-05	321.681	103.604	-0.942832	0.825175	0.174825	224
0100111110100001_0111	3.28841e-05	302.508	82.2263	-0.942618	0.83017	0.16983	225
0000101001010000_0111	0.000491362	3428.77	70.8421	-0.942547	0.825175	0.174825	3362
0100011000000110_0111	0.000964747	6702.44	107.704	-0.941876	0.827173	0.172827	6601
0100001101010010_0111	4.58916e-05	323.065	9.62826	-0.941499	0.836164	0.163836	314
0110010001000011_0111	7.26373e-05	532.95	38.2026	-0.941035	0.833167	0.166833	497
0110111001010011_0111	4.38455e-07	7.77	5.07394	-0.940098	0.862138	0.137862	3
0110011000100110_0111	0.000283973	2037.14	100.151	-0.93996	0.82018	0.17982	1943
0100011000001100_0111	5.9776e-05	465.023	59.6427	-0.939311	0.821179	0.178821	409
0110011000110010_0111	8.44756e-05	614.619	39.0316	-0.938189	0.824176	0.175824	578
0111111001000001_0111	2.92303e-07	5.296	3.51408	-0.937942	0.893107	0.106893	2
0110011100001001_0111	1.82689e-05	154.156	31.1078	-0.937257	0.829171	0.170829	125
0100101011001100_0111	1.46152e-07	4.342	3.56704	-0.936912	0.908092	0.0919081	1
0110011101110101_0111	0.000425593	3072.84	171.889	-0.935721	0.826174	0.173826	2912
0000111000010111_0111	0.000395925	2760.44	54.9817	-0.93553	0.827173	0.172827	2709
0110111000101011_0111	1.75382e-06	19.686	8.23439	-0.933402	0.833167	0.166833	12
0100111010011010_0111	5.84606e-07	7.42	3.66429	-0.933332	0.862138	0.137862	4
0000111000011000_0111	0.000224489	1600.58	69.3058	-0.931841	0.824176	0.175824	1536
0100111001101011_0111	9.49985e-06	84.637	21.0799	-0.931552	0.83017	0.16983	65
0111010000100000_0111	8.92986e-05	677.009	71.003	-0.929665	0.812188	0.187812	611
0110111110000111_0111	1.60767e-06	27.446	17.7097	-0.928642	0.829171	0.170829	11
0100101111101001_0111	8.7691e-07	21.321	16.5029	-0.928385	0.911089	0.0889111	6
0110100100011001_0111	1.16921e-06	15.274	7.83622	-0.928254	0.844156	0.155844	8
0110101100110111_0111	2.92303e-06	38.126	19.5322	-0.928005	0.835165	0.164835	20
0110101001110011_0111	2.48458e-06	30.975	15.0657	-0.927604	0.838162	0.161838	17
0011001010111011_0011	1.54921e-05	214.58	117.073	-0.927452	0.817183	0.182817	106
0100100011001000_0111	1.40306e-05	170.232	80.0558	-0.927253	0.828172	0.171828	96
0100011000001010_0111	5.12992e-05	397.539	50.2133	-0.926825	0.83017	0.16983	351
0100110010100011_0111	1.6369e-05	182.608	76.2958	-0.925451	0.824176	0.175824	112
0010000111011011_0011	5.84606e-07	10.615	7.15094	-0.925053	0.849151	0.150849	4
0100011110000110_0111	7.05912e-05	542.181	63.9968	-0.924749	0.813187	0.186813	483
0110100001100111_0111	4.38455e-06	52.885	24.75	-0.924645	0.828172	0.171828	30
0110100000110110_0111	2.48458e-06	28.514	12.4599	-0.924085	0.835165	0.164835	17
0110101101100010_0111	4.38455e-07	7.29	4.64322	-0.923928	0.873127	0.126873	3
0110111100101011_0111	2.48458e-06	28.326	12.2596	-0.923847	0.836164	0.163836	17
0110110100010101_0111	4.96915e-06	47.095	14.1944	-0.922546	0.834166	0.165834	34
0010001010111101_0011	1.02306e-05	95.676	27.8709	-0.921247	0.828172	0.171828	70
0000111010010010_0111	4.10686e-05	299.451	20.045	-0.92048	0.809191	0.190809	281
0110100001001111_0111	2.92303e-07	5.908	4.24919	-0.919705	0.868132	0.131868	2
0100110011000101_0111	9.93831e-06	99.27	34.0052	-0.919566	0.829171	0.170829	68
0011001001100110_0011	6.13837e-06	65.081	25.1094	-0.919217	0.823177	0.176823	42
0011001000001101_0011	4.96915e-06	49.982	17.3892	-0.919077	0.829171	0.170829	34
0110101100100011_0111	2.92303e-06	37.417	18.9656	-0.918346	0.815185	0.184815	20
0100101010001000_0111	1.13998e-05	160.469	89.8535	-0.917816	0.859141	0.140859	78
0110010101001001_0111	5.26146e-06	45.629	10.514	-0.915828	0.828172	0.171828	36
0110100001111011_0111	1.46152e-06	20.66	11.6683	-0.913589	0.836164	0.163836	10
0100011110100111_0111	0.000200812	1534.27	175.614	-0.912632	0.818182	0.181818	1374
0100101011010111_0111	5.84606e-07	9.422	5.94536	-0.911972	0.841159	0.158841	4
0000111000000111_0111	0.00177545	12348	219.555	-0.91111	0.822178	0.177822	12148
0100100001100110_0111	2.10458e-05	216.511	79.5919	-0.911035	0.814186	0.185814	144
0100011111001001_0111	1.12537e-05	101.371	26.8818	-0.906599	0.825175	0.174825	77
0110111110000001_0111	1.89997e-06	29.966	18.7144	-0.906577	0.827173	0.172827	13
0110100000011100_0111	1.46152e-07	3.137	2.35792	-0.906307	0.899101	0.100899	1
0100101110110101_0111	8.7691e-07	13.575	8.35848	-0.906265	0.837163	0.162837	6
0110101101100011_0111	2.92303e-07	6.234	4.67473	-0.905721	0.856144	0.143856	2
0111100001110010_0111	4.38455e-07	6.829	4.22938	-0.905334	0.87013	0.12987	3
0110101000000010_0111	2.33843e-06	28.834	14.1789	-0.905147	0.819181	0.180819	16
0000111011000010_0111	8.33064e-05	602.967	36.4489	-0.904472	0.819181	0.180819	570
0100010001000010_0111	0.000489023	3405.4	65.7511	-0.903452	0.809191	0.190809	3346
0100101110111000_0111	1.31536e-06	41.381	35.8469	-0.903314	0.926074	0.0739261	9
0011001001111010_0011	1.46152e-07	3.779	3.07923	-0.902499	0.888112	0.111888	1
0100101011101010_0111	2.63073e-06	37.88	22.0366	-0.902136	0.826174	0.173826	18
0110100001000110_0111	4.38455e-07	7.779	5.3004	-0.90163	0.836164	0.163836	3
0110010000000010_0111	0.000262927	1883.4	93.624	-0.901446	0.809191	0.190809	1799
0100011110110101_0111	4.85223e-05	374.99	47.6914	-0.901419	0.822178	0.177822	332
0100011011110110_0111	0.000101722	761.739	73.0947	-0.899368	0.811189	0.188811	696
0100000010100010_0111	0.000150536	1144.09	126.906	-0.899019	0.812188	0.187812	1030
0100111000101110_0111	1.43229e-05	129.581	35.1549	-0.898338	0.82018	0.17982	98
0100101010111010_0111	2.48458e-06	37.006	22.2745	-0.898158	0.855145	0.144855	17
0110101001101111_0111	2.92303e-07	6.469	4.97693	-0.897944	0.839161	0.160839	2
0100001101010000_0111	0.000212066	1487.28	40.4299	-0.897257	0.817183	0.182817	1451
0110101000001011_0111	4.38455e-07	7.848	5.40575	-0.896823	0.84016	0.15984	3
0010000111000000_0011	1.72459e-05	162.444	49.5697	-0.896596	0.813187	0.186813	118
0010000001011100_0011	4.31147e-05	347.56	58.6359	-0.896379	0.82018	0.17982	295
0010000011000100_0011	0.000147759	1290.02	311.29	-0.896322	0.818182	0.181818	1011
0100111011111001_0111	1.34459e-05	132.642	45.3726	-0.895738	0.8002	0.1998	92
0100100011010011_0111	4.2384e-06	46.343	19.3638	-0.895641	0.815185	0.184815	29
0000101001010100_0111	9.68985e-05	678.352	17.1641	-0.894427	0.831169	0.168831	663
0100011000101010_0111	0.00010976	833.099	91.7942	-0.894381	0.812188	0.187812	751
0100111101000000_0111	3.91686e-05	353.484	95.5808	-0.894364	0.816184	0.183816	268
0100111101000001_0111	2.49919e-05	232.772	69.0714	-0.894321	0.804196	0.195804	171
0110110101111111_0111	3.06918e-06	32.6	12.9726	-0.894193	0.822178	0.177822	21
0110010101001010_0111	7.30758e-07	7.98	3.33717	-0.892971	0.858142	0.141858	5
0110100100001000_0111	1.89997e-06	25.007	13.4557	-0.892335	0.816184	0.183816	13
0100001010001011_0111	9.79216e-06	94.307	30.6091	-0.892119	0.824176	0.175824	67
0100111010101111_0111	1.60767e-05	164.202	60.7916	-0.891604	0.805195	0.194805	110
0100001111110101_0111	1.68074e-05	136.449	24.0919	-0.890299	0.816184	0.183816	115
0110011101000001_0111	0.000116483	852.676	62.5972	-0.889433	0.815185	0.184815	797
0111011101100011_0111	3.11303e-05	237.648	27.7247	-0.889027	0.823177	0.176823	213
0100110010110011_0111	1.28613e-05	162.465	83.7904	-0.888705	0.813187	0.186813	88
0100101110010011_0111	1.60767e-06	21.171	11.4501	-0.888289	0.81019	0.18981	11
0000111001110111_0111	0.00201821	14044.5	265.41	-0.887492	0.824176	0.175824	13809
0010000011000101_0011	0.000112244	995.38	256.226	-0.88742	0.812188	0.187812	768
0100011110110000_0111	9.14909e-05	710.299	95.1007	-0.886418	0.812188	0.187812	626
0100101110000001_0111	9.20755e-06	122.885	67.6247	-0.885549	0.799201	0.200799	63
0111111001010000_0111	2.92303e-07	4.806	3.16992	-0.885195	0.868132	0.131868	2
0010001000001000_0011	0.000795357	6126.02	773.205	-0.88466	0.805195	0.194805	5442
0010000110011011_0011	1.75382e-05	200.097	91.1114	-0.87911	0.804196	0.195804	120
0000111100000000_0111	0.00173102	12095	285.516	-0.878944	0.813187	0.186813	11844
0111110000000000_0111	2.77688e-06	31.449	14.2072	-0.876249	0.822178	0.177822	19
0100110011101101_0111	2.63073e-06	36.528	21.1697	-0.875212	0.838162	0.161838	18
0111111000000111_0111	5.84606e-07	7.832	4.38098	-0.874691	0.848152	0.151848	4
0100001000010011_0111	0.000141621	994.745	29.4558	-0.874021	0.815185	0.184815	969
0000101100010000_0111	0.000362602	2552.84	82.2306	-0.87358	0.804196	0.195804	2481
0100011011001101_0111	6.28452e-06	56.254	15.1964	-0.872181	0.815185	0.184815	43
0111101000000000_0111	1.02306e-06	13.319	7.24636	-0.872024	0.829171	0.170829	7
0000101001011000_0111	0.000147613	1053.12	49.4518	-0.87196	0.814186	0.185814	1010
0011001001101011_0011	7.30758e-07	9.811	5.51758	-0.87194	0.837163	0.162837	5
0010001000001111_0011	1.88536e-05	160.912	36.6081	-0.871719	0.817183	0.182817	129
0110100000110101_0111	3.36149e-06	37.627	16.7931	-0.871013	0.804196	0.195804	23
0100101111100011_0111	1.60767e-06	21.788	12.3878	-0.870854	0.803197	0.196803	11
0011001010001011_0011	3.36149e-06	53.942	35.5515	-0.870344	0.806194	0.193806	23
0100111101100101_0111	1.50536e-05	142.473	45.4226	-0.869016	0.789211	0.210789	103
0110110100111010_0111	1.46152e-07	2.641	1.88936	-0.868547	0.901099	0.0989011	1
0110100000011011_0111	1.02306e-06	13.346	7.31969	-0.866977	0.831169	0.168831	7
0100101010101010_0111	6.72297e-06	91.942	52.9977	-0.866868	0.823177	0.176823	46
0100101110010010_0111	1.46152e-07	4.577	4.12688	-0.866757	0.857143	0.142857	1
0110010100100100_0111	0.000151851	1112.65	85.1256	-0.86525	0.809191	0.190809	1039
0100111011001001_0111	7.16143e-06	69.941	24.2064	-0.865104	0.801199	0.198801	49
0110101001100111_0111	1.89997e-06	24.962	13.8481	-0.8638	0.801199	0.198801	13
0100110011000010_0111	4.2384e-06	40.939	13.8456	-0.862295	0.813187	0.186813	29
0000111100100010_0111	0.00121452	8464.33	179.077	-0.861825	0.802198	0.197802	8310
0100111101010000_0111	4.0484e-05	350.617	85.4489	-0.861533	0.793207	0.206793	277
0110111001111111_0111	2.92303e-06	30.885	12.6436	-0.860913	0.811189	0.188811	20
0110001100011010_0111	1.46152e-07	2.629	1.89234	-0.86084	0.888112	0.111888	1
0100001101110101_0111	0.000302826	2135.33	73.5751	-0.86078	0.804196	0.195804	2072
0111110010000111_0111	1.46152e-07	3.299	2.67147	-0.860576	0.88012	0.11988	1
0100001001101000_0111	6.56221e-05	504.752	64.9313	-0.85863	0.805195	0.194805	449
0110111111110001_0111	2.48458e-06	35.619	21.7218	-0.857158	0.823177	0.176823	17
0110111111100101_0111	7.30758e-07	11.946	8.10449	-0.857056	0.816184	0.183816	5
0100100010100110_0111	1.06691e-05	106.867	39.5408	-0.856507	0.798202	0.201798	73
0110111001000111_0111	2.19227e-06	24.216	10.7649	-0.856115	0.795205	0.204795	15
0010000110011010_0011	4.38455e-07	16.697	16.0209	-0.854945	0.855145	0.144855	3
0100101011010101_0111	1.46152e-07	3.76	3.2303	-0.85441	0.844156	0.155844	1
0100111101110110_0111	6.07991e-05	524.18	126.677	-0.853981	0.793207	0.206793	416
0110111100010001_0111	6.86912e-06	68.307	24.9531	-0.853882	0.797203	0.202797	47
0110110010101101_0111	4.38455e-07	9.602	7.73262	-0.853786	0.834166	0.165834	3
0011000011100000_0011	6.54759e-05	588.73	164.929	-0.853276	0.796204	0.203796	448
0000101000010011_0111	0.000228873	1599.38	39.1423	-0.852837	0.811189	0.188811	1566
0010000011101011_0011	8.44756e-05	779.359	236.271	-0.852237	0.807193	0.192807	578
0010000101011000_0011	8.7691e-07	12.087	7.15168	-0.851128	0.801199	0.198801	6
0110100100011101_0111	4.38455e-07	6.605	4.23662	-0.850915	0.848152	0.151848	3
0010000110001000_0011	5.9776e-05	557.851	175.129	-0.849948	0.79021	0.20979	409
0000111010001011_0111	0.000172459	1222.57	50.0919	-0.849878	0.808192	0.191808	1180
0110111100010111_0111	4.2384e-06	44.26	17.9639	-0.84948	0.808192	0.191808	29
0100110010100111_0111	2.84996e-05	255.025	70.6653	-0.849427	0.794206	0.205794	195
0110100100001101_0111	1.02306e-06	13.731	7.92474	-0.849366	0.806194	0.193806	7
0110111111100000_0111	3.21533e-06	42.651	24.3413	-0.848394	0.799201	0.200799	22
0110111111010000_0111	1.46152e-07	7.735	7.94518	-0.847684	0.844156	0.155844	1
0100100011111000_0111	2.96688e-05	332.415	152.778	-0.847078	0.764236	0.235764	203
0110101000111111_0111	7.30758e-07	9.78	5.65098	-0.845872	0.832168	0.167832	5
0111101100110000_0111	1.46152e-07	3.365	2.796	-0.845852	0.864136	0.135864	1
0100101011001111_0111	2.92303e-07	7.556	6.56993	-0.845671	0.872128	0.127872	2
0100001000100101_0111	0.000362748	2527.98	54.3756	-0.845636	0.8002	0.1998	2482
0110111101010011_0111	1.31536e-06	14.942	7.0278	-0.845499	0.823177	0.176823	9
0000111001101110_0111	0.000281634	2002.72	89.564	-0.845385	0.812188	0.187812	1927
0100111011010011_0111	1.89997e-06	20.118	8.42051	-0.845317	0.807193	0.192807	13
0100001011001001_0111	2.63073e-06	26.123	9.61063	-0.84521	0.816184	0.183816	18
0100000011110101_0111	5.45145e-05	427.961	65.0732	-0.844602	0.799201	0.200799	373
0110100010000101_0111	7.30758e-07	17.784	15.1378	-0.844509	0.822178	0.177822	5
0110111100010000_0111	2.48458e-06	27.976	13.0009	-0.844247	0.82018	0.17982	17
0110110001111001_0111	2.63073e-06	28.802	12.8066	-0.843472	0.808192	0.191808	18
0010000111100101_0011	3.79994e-06	39.463	15.9629	-0.843394	0.828172	0.171828	26
0110110101100000_0111	5.55376e-06	54.834	19.9781	-0.842624	0.812188	0.187812	38
0110010100001101_0111	2.65996e-05	212.038	35.6487	-0.842612	0.788212	0.211788	182
0110100100001100_0111	1.46152e-07	3.822	3.35135	-0.842049	0.868132	0.131868	1
0100001001010110_0111	1.13998e-05	81.592	4.26658	-0.841891	0.837163	0.162837	78
0110111001001100_0111	5.84606e-07	7.88	4.62179	-0.839501	0.819181	0.180819	4
0110101100010111_0111	7.30758e-07	10.718	6.81182	-0.839423	0.834166	0.165834	5
0110101000010101_0111	1.46152e-07	4.316	3.9575	-0.837903	0.914086	0.0859141	1
0110101100111101_0111	1.46152e-07	3.689	3.20976	-0.837756	0.862138	0.137862	1
0100101111101010_0111	2.92303e-07	8.143	7.34387	-0.83648	0.889111	0.110889	2
0100101011010010_0111	7.30758e-07	10.641	6.74771	-0.835987	0.807193	0.192807	5
0110111110000011_0111	4.38455e-07	9.026	7.21078	-0.835693	0.841159	0.158841	3
0111111001000100_0111	2.92303e-07	4.533	3.03119	-0.835646	0.843157	0.156843	2
0100101011001011_0111	2.92303e-07	6.471	5.35049	-0.835624	0.834166	0.165834	2
0100011110001000_0111	2.96688e-05	273.165	84.0306	-0.834993	0.798202	0.201798	203
0100001000010111_0111	0.000140159	982.542	28.2015	-0.834779	0.806194	0.193806	959
0111111001100010_0111	5.84606e-07	7.22	3.85752	-0.834733	0.851149	0.148851	4
0100101110110000_0111	5.11531e-06	61.934	32.2727	-0.834575	0.787213	0.212787	35
0011001001010101_0011	6.13837e-06	75.311	39.925	-0.83434	0.8002	0.1998	42
0100101000110100_0111	1.31536e-06	14.733	6.87524	-0.833861	0.818182	0.181818	9
0100001011001000_0111	5.55376e-06	52.302	17.1524	-0.833819	0.803197	0.196803	38
0100101110000011_0111	4.96915e-06	59.83	31.0177	-0.832751	0.775225	0.224775	34
0100101010101011_0111	7.01528e-06	93.95	55.2026	-0.832388	0.802198	0.197802	48
0110111000110011_0111	3.79994e-06	39.931	16.7438	-0.83201	0.785215	0.214785	26
0011001001000100_0011	1.24229e-05	125.609	48.817	-0.831863	0.791209	0.208791	85
0110100000000100_0111	8.47679e-06	83.874	31.1362	-0.830994	0.808192	0.191808	58
0100111000111011_0111	6.57682e-06	62.714	21.3596	-0.829323	0.802198	0.197802	45
0100010011011110_0111	1.46152e-06	15.486	6.61828	-0.828917	0.809191	0.190809	10
0111100001110111_0111	4.38455e-07	8.071	6.12466	-0.827964	0.856144	0.143856	3
0011001011101100_0011	1.46152e-07	3.565	3.10022	-0.82736	0.879121	0.120879	1
0110011000010011_0111	1.69536e-05	128.722	15.3769	-0.827345	0.815185	0.184815	116
0100001101110011_0111	0.00117447	8193.53	190.483	-0.827007	0.81019	0.18981	8036
0100111000011011_0111	1.60767e-06	16.827	7.05825	-0.825559	0.804196	0.195804	11
0110101000000011_0111	2.04612e-06	23.842	11.9394	-0.824329	0.8002	0.1998	14
0100001111101100_0111	4.38455e-07	6.628	4.40352	-0.823886	0.851149	0.148851	3
0110111000011111_0111	1.46152e-07	3.06	2.50613	-0.821985	0.872128	0.127872	1
0011001110000010_0011	1.46152e-06	18.484	10.3295	-0.821337	0.801199	0.198801	10
0100101010010110_0111	2.92303e-07	4.262	2.75771	-0.820246	0.837163	0.162837	2
0110101100000011_0111	1.31536e-06	18.05	11.0423	-0.819579	0.796204	0.203796	9
0110001000001001_0111	9.93831e-06	85.028	20.7791	-0.819477	0.78022	0.21978	68
0100011110000111_0111	0.000240712	1795.77	181.672	-0.818867	0.782218	0.217782	1647
0000111101010000_0111	0.00104659	7270.25	133.426	-0.818837	0.791209	0.208791	7161
0100010001010010_0111	0.000289234	2005.29	32.1142	-0.818578	0.807193	0.192807	1979
0110100000101101_0111	1.60767e-06	19.242	10.0699	-0.818479	0.813187	0.186813	11
0110110110000111_0111	2.19227e-06	28.136	16.0539	-0.818244	0.797203	0.202797	15
0111101001110010_0111	1.46152e-07	3.017	2.46633	-0.817814	0.881119	0.118881	1
0100001010011110_0111	2.92303e-07	4.035	2.48997	-0.817277	0.86014	0.13986	2
0110101000010000_0111	1.31536e-06	17.236	10.0789	-0.817154	0.795205	0.204795	9
0110101000001000_0111	2.33843e-06	29.781	16.8792	-0.816448	0.793207	0.206793	16
0100011011010011_0111	9.79216e-06	80.483	16.5202	-0.816153	0.804196	0.195804	67
0100111110100100_0111	1.00845e-05	91.983	28.18	-0.815578	0.807193	0.192807	69
0110111000001000_0111	5.99222e-06	58.757	21.815	-0.813982	0.785215	0.214785	41
0100101000111001_0111	5.84606e-06	56.1	19.7807	-0.813923	0.796204	0.203796	40
0100011000000111_0111	0.00169375	11760.3	210.58	-0.813444	0.782218	0.217782	11589
0110111101010010_0111	4.38455e-07	5.347	2.88564	-0.813338	0.846154	0.153846	3
0100001010101011_0111	1.91459e-05	168.557	46.2014	-0.812897	0.807193	0.192807	131
0111101000000101_0111	1.46152e-07	3.282	2.80969	-0.812189	0.883117	0.116883	1
0110100010001000_0111	1.16921e-06	21.653	16.8116	-0.812119	0.805195	0.194805	8
0110100000101010_0111	3.21533e-06	34.073	14.8675	-0.812039	0.808192	0.191808	22
0100101111001001_0111	2.92303e-07	6.891	6.02374	-0.811954	0.873127	0.126873	2
0000111100100001_0111	0.00125632	8759.76	201.788	-0.811531	0.792208	0.207792	8596
0100011000100100_0111	0.000889332	6181.71	119.172	-0.811527	0.796204	0.203796	6085
0100001000010000_0111	0.000415801	2897.77	65.0583	-0.811165	0.803197	0.196803	2845
0010000111100010_0011	8.62294e-06	76.803	21.966	-0.81048	0.8002	0.1998	59
0100101011101101_0111	5.84606e-07	10.86	8.47255	-0.809673	0.832168	0.167832	4
0110000100011001_0111	4.09224e-06	37.959	12.3095	-0.809047	0.795205	0.204795	28
0110011100111111_0111	2.45535e-05	196.039	34.6691	-0.808761	0.786214	0.213786	168
0111011101010100_0111	7.74603e-06	63.52	13.0091	-0.808664	0.795205	0.204795	53
0110111100100001_0111	1.66613e-05	148.419	42.6232	-0.807519	0.789211	0.210789	114
0100001011011010_0111	8.7691e-07	9.549	4.3967	-0.807197	0.811189	0.188811	6
0010000011110010_0011	0.000203297	1661.29	334.994	-0.806839	0.785215	0.214785	1391
0011000011001001_0011	5.99222e-06	75.55	42.8267	-0.80674	0.789211	0.210789	41
0100011101100010_0111	0.000447808	3126.31	77.3389	-0.805714	0.779221	0.220779	3064
0100101111111011_0111	2.48458e-06	58.502	51.5131	-0.80566	0.891109	0.108891	17
0110110101101001_0111	8.7691e-07	9.858	4.793	-0.804925	0.806194	0.193806	6
0010001000110000_0011	0.00391379	27409.1	783.027	-0.804749	0.79021	0.20979	26779
0110011100011100_0111	1.16921e-06	11.69	4.59227	-0.803523	0.834166	0.165834	8
0110101101111111_0111	8.7691e-07	12.302	7.84489	-0.803325	0.791209	0.208791	6
0100110010111001_0111	7.16143e-06	128.548	99.1485	-0.802312	0.903097	0.0969031	49
0100100011001011_0111	2.48458e-06	32.47	19.3032	-0.801421	0.797203	0.202797	17
0110111000010100_0111	2.92303e-07	4.172	2.71178	-0.800949	0.85015	0.14985	2
0110100001000011_0111	8.7691e-07	13.098	8.86199	-0.800948	0.793207	0.206793	6
0011000010010111_0011	3.06918e-06	40.514	24.3688	-0.800777	0.794206	0.205794	21
0010001010011000_0011	2.58688e-05	342.184	206.339	-0.800545	0.777223	0.222777	177
0010000010101100_0011	0.000150975	1251.07	272.431	-0.800442	0.782218	0.217782	1033
0100011000000101_0111	0.000929816	6470.41	135.53	-0.799909	0.791209	0.208791	6362
0100100010111011_0111	6.43067e-06	99.966	70.0863	-0.798529	0.81019	0.18981	44
0100011000111101_0111	1.60767e-05	123.516	16.9363	-0.798049	0.787213	0.212787	110
0100001111010110_0111	2.92303e-07	3.332	1.6693	-0.797939	0.88012	0.11988	2
0100000010111000_0111	6.62067e-05	551.56	123.643	-0.797133	0.786214	0.213786	453
0011001010101100_0011	5.84606e-07	8.4	5.52273	-0.796708	0.791209	0.208791	4
0011000011001000_0011	3.06918e-06	58.709	47.3447	-0.796478	0.777223	0.222777	21
0100111101000100_0111	7.01528e-06	67.752	24.8003	-0.796442	0.775225	0.224775	48
0011000010110110_0011	2.63073e-06	36.449	23.1958	-0.795361	0.792208	0.207792	18
0110110110011001_0111	4.38455e-07	6.656	4.599	-0.794955	0.818182	0.181818	3
0000101001010001_0111	0.000409517	2852.39	63.4318	-0.79438	0.784216	0.215784	2802
0011001011110100_0011	2.92303e-07	5.333	4.1983	-0.793892	0.847153	0.152847	2
0100001010110101_0111	7.01528e-06	57.307	11.7313	-0.793345	0.783217	0.216783	48
0111111001000101_0111	1.46152e-07	2.861	2.34589	-0.793304	0.87013	0.12987	1
0110100000000101_0111	1.19844e-05	117.76	45.1073	-0.792777	0.771229	0.228771	82
0100101010111100_0111	5.84606e-07	7.879	4.89636	-0.792221	0.813187	0.186813	4
0110100001111000_0111	3.50764e-06	39.214	19.2148	-0.791787	0.796204	0.203796	24
0100100001010110_0111	1.46152e-06	16.643	8.39464	-0.791338	0.783217	0.216783	10
0100100011111100_0111	3.79994e-06	50.019	30.3898	-0.790364	0.811189	0.188811	26
0100101011111000_0111	9.20755e-06	109.945	59.4467	-0.789699	0.78022	0.21978	63
0110010101010011_0111	5.86068e-05	426.998	32.9533	-0.788935	0.784216	0.215784	401
0100111011011001_0111	3.06918e-06	33.882	16.3424	-0.788258	0.802198	0.197802	21
0110011100011101_0111	3.36149e-06	30.188	9.1271	-0.787545	0.794206	0.205794	23
0110001100000000_0111	0.000201251	1462.03	108.083	-0.786699	0.778222	0.221778	1377
0000111001111100_0111	0.000172167	1229.92	66.0157	-0.786495	0.792208	0.207792	1178
0110111000000010_0111	3.65379e-06	35.175	12.9446	-0.786039	0.791209	0.208791	25
0100011111000101_0111	4.91069e-05	378.718	54.3473	-0.786019	0.775225	0.224775	336
0010000100100010_0011	0.00242465	17099.3	648.235	-0.785694	0.781219	0.218781	16590
0100101110011000_0111	5.84606e-07	15.664	14.8647	-0.78468	0.858142	0.141858	4
0110101000110101_0111	2.92303e-07	4.93	3.73404	-0.784673	0.837163	0.162837	2
0100011110010100_0111	1.41767e-05	110.015	16.6031	-0.78389	0.803197	0.196803	97
0010001011101011_0011	6.13837e-06	64.882	29.207	-0.783441	0.778222	0.221778	42
0010001010011110_0011	4.38455e-07	6.986	5.09016	-0.78308	0.798202	0.201798	3
0100100011101000_0111	2.23612e-05	241.421	113.137	-0.781542	0.76024	0.23976	153
0100101110111001_0111	2.04612e-06	53.007	49.9222	-0.781355	0.906094	0.0939061	14
0011000010000100_0011	1.53459e-05	144.52	50.6198	-0.780723	0.776224	0.223776	105
0110111101001000_0111	1.60767e-06	17.969	8.92792	-0.780585	0.794206	0.205794	11
0110111011101000_0111	1.46152e-06	18.768	11.2577	-0.778847	0.776224	0.223776	10
0110111001000110_0111	1.31536e-06	14.005	6.4368	-0.77756	0.79021	0.20979	9
0100101111001000_0111	4.38455e-07	9.888	8.86262	-0.777197	0.819181	0.180819	3
0110100101110101_0111	1.60767e-06	18.724	9.94025	-0.777043	0.774226	0.225774	11
0100111110010010_0111	1.46152e-06	15.252	6.77986	-0.774648	0.791209	0.208791	10
0110100010000110_0111	1.46152e-07	4.179	4.1051	-0.774403	0.841159	0.158841	1
0100101000101000_0111	3.50764e-05	320.103	103.471	-0.774162	0.782218	0.217782	240
0100101110101010_0111	8.7691e-07	23.798	23.0034	-0.773712	0.892108	0.107892	6
0100001100100000_0111	0.00173511	12113.3	311.931	-0.773643	0.777223	0.222777	11872
0100111101100110_0111	4.61839e-05	391.108	97.1195	-0.773357	0.756244	0.243756	316
0110111101000010_0111	4.38455e-07	5.399	3.10249	-0.773251	0.822178	0.177822	3
0110101101100000_0111	1.31536e-06	18.799	12.6839	-0.772554	0.79021	0.20979	9
0100101111000110_0111	1.46152e-07	2.477	1.91498	-0.771289	0.88012	0.11988	1
0000101011001100_0111	4.15071e-05	301.903	23.2263	-0.770809	0.798202	0.201798	284
0100101011111011_0111	4.5307e-06	54.479	30.5249	-0.769175	0.738262	0.261738	31
0100101010110011_0111	5.55376e-06	54.591	21.5759	-0.768958	0.781219	0.218781	38
0110110000000011_0111	9.79216e-06	103.865	47.9797	-0.768346	0.767233	0.232767	67
0100011001000111_0111	0.000680774	4724.23	86.2786	-0.767641	0.788212	0.211788	4658
0110011100011000_0111	4.2384e-06	37.17	10.6592	-0.766473	0.786214	0.213786	29
0010000011110011_0011	0.000501738	4067.72	828.15	-0.766434	0.766234	0.233766	3433
0100110010110001_0111	2.3092e-05	227.5	90.8146	-0.765296	0.777223	0.222777	158
0100001010010101_0111	4.2384e-06	35.489	8.48268	-0.764971	0.797203	0.202797	29
0111101000110111_0111	2.92303e-07	4.364	3.09307	-0.76429	0.822178	0.177822	2
0100101010011111_0111	1.02306e-06	12.828	7.63221	-0.763606	0.781219	0.218781	7
0110111111100110_0111	1.46152e-06	18.56	11.2132	-0.763385	0.772228	0.227772	10
0100011110110111_0111	0.000122475	916.359	102.706	-0.762945	0.769231	0.230769	838
0110100101011101_0111	1.46152e-07	3.12	2.78341	-0.761657	0.834166	0.165834	1
0110110000011111_0111	8.7691e-07	10.367	5.73526	-0.76143	0.805195	0.194805	6
0100001001111001_0111	4.99838e-05	377.082	46.0934	-0.761107	0.785215	0.214785	342
0100011101100101_0111	0.000427786	2986.22	77.8891	-0.760312	0.771229	0.228771	2927
0110100001001101_0111	2.92303e-07	5.472	4.56728	-0.760189	0.806194	0.193806	2
0000101111000100_0111	1.72459e-05	129.496	15.1401	-0.75931	0.782218	0.217782	118
0110100001100010_0111	3.79994e-06	37.685	15.3977	-0.75888	0.773227	0.226773	26
0100011101100011_0111	0.00068472	4757.04	94.9638	-0.758626	0.776224	0.223776	4685
0100000001110010_0111	0.00133422	9284.12	204.591	-0.758185	0.785215	0.214785	9129
0111100001100010_0111	4.38455e-07	5.621	3.45967	-0.757586	0.805195	0.194805	3
0010001010011111_0011	2.33843e-06	28.984	17.146	-0.757261	0.769231	0.230769	16
0110110001001110_0111	2.92303e-07	4.629	3.47324	-0.756929	0.821179	0.178821	2
0100111010011110_0111	4.38455e-07	6.211	4.24623	-0.756199	0.804196	0.195804	3
0100111010110011_0111	5.99222e-06	55.801	19.6098	-0.754776	0.776224	0.223776	41
0100101011000101_0111	2.92303e-07	4.786	3.6924	-0.754522	0.84016	0.15984	2
0100001011011110_0111	1.46152e-07	2.445	1.91694	-0.753806	0.865135	0.134865	1
0110111101000000_0111	6.28452e-06	60.384	23.0775	-0.753286	0.758242	0.241758	43
0110111001001101_0111	5.84606e-07	7.269	4.3446	-0.752429	0.819181	0.180819	4
0011001100110011_0011	0.000122183	912.446	101.745	-0.75135	0.767233	0.232767	836
0100001010011001_0111	2.63073e-06	24.5	8.66655	-0.75001	0.799201	0.200799	18
0110111011101100_0111	4.38455e-07	6.664	4.89091	-0.749144	0.797203	0.202797	3
0011001011001000_0011	1.46152e-07	4.496	4.6731	-0.748112	0.802198	0.197802	1
0000100001000010_0111	0.000500861	3488.83	82.6635	-0.747996	0.782218	0.217782	3427
0010000111111001_0011	3.36149e-06	32.44	12.6224	-0.747875	0.768232	0.231768	23
0110110101000101_0111	3.36149e-06	34.578	15.4906	-0.747422	0.763237	0.236763	23
0110110101001101_0111	7.30758e-07	9.773	6.39017	-0.746928	0.783217	0.216783	5
0100001011101000_0111	2.33843e-05	198.446	51.5138	-0.746325	0.773227	0.226773	160
0100011001100110_0111	0.00142512	9864.44	152.003	-0.746313	0.773227	0.226773	9751
0110110001001001_0111	2.33843e-06	23.542	10.1109	-0.745927	0.792208	0.207792	16
0110100101000000_0111	8.7691e-07	11.454	7.32609	-0.744463	0.784216	0.215784	6
0110001100000110_0111	2.4115e-05	176.478	15.4228	-0.744222	0.771229	0.228771	165
0100001101000010_0111	4.99838e-05	351.507	12.7746	-0.744214	0.785215	0.214785	342
0110101000000111_0111	3.50764e-06	36.296	16.5425	-0.743298	0.77023	0.22977	24
0010000111000110_0011	4.38455e-07	6.452	4.64513	-0.743143	0.804196	0.195804	3
0100110010110101_0111	1.12537e-05	98.768	29.294	-0.743088	0.773227	0.226773	77
0111110000110011_0111	7.30758e-07	11.222	8.37489	-0.742935	0.811189	0.188811	5
0111111000100101_0111	4.38455e-07	5.432	3.2766	-0.742233	0.811189	0.188811	3
0100100011011000_0111	8.03834e-06	87.466	43.8171	-0.740944	0.734266	0.265734	55
0100101011010001_0111	1.31536e-06	15.799	9.1797	-0.740656	0.766234	0.233766	9
0100101111101110_0111	2.92303e-07	6.776	6.45907	-0.739426	0.849151	0.150849	2
0000111111011010_0111	6.91297e-05	498.071	33.9074	-0.739396	0.803197	0.196803	473
0110001100000111_0111	0.000143229	1041.51	83.1924	-0.739311	0.77023	0.22977	980
0111111001100110_0111	8.7691e-07	9.373	4.5667	-0.738608	0.802198	0.197802	6
0110111101101010_0111	8.7691e-07	9.731	5.05393	-0.738238	0.795205	0.204795	6
0010000011101010_0011	4.28224e-05	399.594	144.44	-0.737979	0.769231	0.230769	293
0100111010010001_0111	3.36149e-06	32.165	12.4354	-0.737011	0.758242	0.241758	23
0010001010001000_0011	0.000186343	1749.96	645.423	-0.735887	0.756244	0.243756	1275
0110010100100000_0111	0.000440793	3179.97	222.845	-0.735783	0.766234	0.233766	3016
0000111110010000_0111	0.000286457	2025.67	89.4475	-0.734151	0.769231	0.230769	1960
0110100100101110_0111	1.46152e-07	2.614	2.19996	-0.733648	0.83017	0.16983	1
0100111101100000_0111	8.47679e-05	711.89	180.092	-0.732347	0.754246	0.245754	580
0110111111100111_0111	2.92303e-06	35.023	20.5331	-0.731648	0.754246	0.245754	20
0011001010100011_0011	4.44301e-05	381.924	106.609	-0.730934	0.764236	0.235764	304
0110101100011111_0111	1.46152e-07	3.071	2.83443	-0.730658	0.822178	0.177822	1
0111110000110000_0111	1.31536e-06	15.731	9.21735	-0.730253	0.783217	0.216783	9
0100101010101110_0111	2.33843e-06	28.577	17.223	-0.730246	0.739261	0.260739	16
0100101011111010_0111	3.65379e-06	42.246	23.6313	-0.729794	0.726274	0.273726	25
0110101001111010_0111	4.38455e-07	5.824	3.87092	-0.729543	0.787213	0.212787	3
0000111000101000_0111	0.00151545	10645.9	379.576	-0.729457	0.766234	0.233766	10369
0100101010111110_0111	1.02306e-06	12.269	7.22474	-0.7293	0.76024	0.23976	7
0100011110101010_0111	1.46152e-05	124.781	33.9849	-0.729177	0.748252	0.251748	100
0100001010110100_0111	4.5307e-06	36.414	7.42548	-0.729111	0.791209	0.208791	31
0011001000001110_0011	5.84606e-07	8.245	5.82726	-0.728473	0.788212	0.211788	4
0100100011111011_0111	1.66613e-05	181.077	92.1202	-0.728146	0.715285	0.284715	114
0110111110001010_0111	1.46152e-07	2.897	2.61021	-0.726761	0.834166	0.165834	1
0110100001000101_0111	1.60767e-06	19.487	11.6827	-0.726462	0.764236	0.235764	11
0100100010110110_0111	6.43067e-06	61.462	24.0414	-0.726329	0.771229	0.228771	44
0000000011010011_0011	0.00233755	16366.1	512.582	-0.726002	0.772228	0.227772	15994
0110111101000100_0111	2.63073e-06	26.494	11.7044	-0.72571	0.768232	0.231768	18
0110111101010001_0111	8.03834e-06	75.986	28.9314	-0.725371	0.763237	0.236763	55
0100110011011011_0111	3.79994e-06	39.142	18.127	-0.724996	0.761239	0.238761	26
0100101010001101_0111	2.63073e-06	32.991	20.6814	-0.724854	0.776224	0.223776	18
0110011101100110_0111	0.000237496	1692.24	92.8823	-0.723959	0.769231	0.230769	1625
0110111000001101_0111	1.60767e-06	16.392	7.44821	-0.723932	0.79021	0.20979	11
0110111100011011_0111	4.38455e-07	5.971	4.11571	-0.721868	0.799201	0.200799	3
0100111101010001_0111	6.25529e-05	523.248	131.998	-0.721586	0.748252	0.251748	428
0110011001000111_0111	9.09063e-05	662.084	55.5695	-0.721331	0.769231	0.230769	622
0100001101100100_0111	2.49919e-05	179.142	11.3158	-0.719523	0.786214	0.213786	171
0110111100010100_0111	7.30758e-07	7.648	3.68506	-0.718577	0.801199	0.198801	5
0100111101110101_0111	8.81294e-05	742.709	194.7	-0.717559	0.753247	0.246753	603
0100011011110100_0111	4.55993e-05	338.987	37.6113	-0.717523	0.768232	0.231768	312
0110010000000100_0111	0.000591475	4167.37	167.779	-0.717421	0.76024	0.23976	4047
0100011011000110_0111	3.06918e-05	232.558	31.4703	-0.716802	0.764236	0.235764	210
0000111101110101_0111	0.0019273	13413.5	316.246	-0.716222	0.772228	0.227772	13187
0100100001110100_0111	1.85613e-05	181.005	75.5464	-0.714859	0.748252	0.251748	127
0000100001000011_0111	0.000593522	4121.39	84.5136	-0.714559	0.76024	0.23976	4061
0110110010011001_0111	4.38455e-07	6.258	4.56555	-0.713605	0.798202	0.201798	3
0100101110110111_0111	5.99222e-06	63.1	30.9771	-0.713431	0.747253	0.252747	41
0100110011111011_0111	1.12537e-05	116.979	56.0711	-0.713006	0.739261	0.260739	77
0110111111010001_0111	7.30758e-07	12.72	10.8278	-0.712981	0.753247	0.246753	5
0110101100101000_0111	1.31536e-06	18.275	13.0174	-0.712508	0.745255	0.254745	9
0100111011101011_0111	6.13837e-06	57.05	21.1259	-0.712396	0.739261	0.260739	42
0000101100100001_0111	0.00045687	3201.17	105.649	-0.711481	0.766234	0.233766	3126
0011001001010111_0011	3.79994e-06	42.337	22.9642	-0.711411	0.74026	0.25974	26
0100101110111010_0111	8.7691e-07	16.087	14.1849	-0.71111	0.84016	0.15984	6
0110001100000011_0111	9.04678e-05	660.095	57.8116	-0.710844	0.766234	0.233766	619
0100100010111000_0111	2.67457e-05	288.793	149.096	-0.709561	0.723277	0.276723	183
0100100001010100_0111	7.89219e-06	78.815	34.9973	-0.709055	0.739261	0.260739	54
0111100001010000_0111	4.38455e-07	5.842	4.00838	-0.709015	0.795205	0.204795	3
0110010100001011_0111	8.91525e-06	71.232	14.4348	-0.708841	0.767233	0.232767	61
0000110001100101_0111	0.000243196	1702.22	53.9347	-0.708672	0.757243	0.242757	1664
0111100001110100_0111	1.46152e-07	2.795	2.53326	-0.708574	0.836164	0.163836	1
0100101011111101_0111	1.31536e-06	19.769	15.214	-0.707836	0.798202	0.201798	9
0111111001100111_0111	1.02306e-06	11.082	5.76858	-0.707626	0.777223	0.222777	7
0110110110001010_0111	1.46152e-07	2.536	2.17104	-0.707495	0.841159	0.158841	1
0110111010101001_0111	8.7691e-07	10.873	6.91511	-0.704689	0.773227	0.226773	6
0011001000000010_0011	0.000215281	1564.15	129.543	-0.703612	0.765235	0.234765	1473
0100101010011101_0111	4.38455e-07	6.037	4.33202	-0.701059	0.785215	0.214785	3
0000111001011010_0111	5.3053e-05	378.209	21.7013	-0.700834	0.763237	0.236763	363
0100100011101101_0111	1.31536e-06	17.646	12.3391	-0.7007	0.755245	0.244755	9
0110110101101101_0111	5.84606e-07	6.772	3.95774	-0.7004	0.791209	0.208791	4
0111101001110111_0111	4.38455e-07	6.859	5.51339	-0.699932	0.817183	0.182817	3
0100101110010111_0111	2.04612e-06	23.844	14.0867	-0.698813	0.731269	0.268731	14
0000110011010001_0111	0.000340095	2406.54	113.848	-0.698645	0.766234	0.233766	2327
0000111111100110_0111	0.000426763	3020.9	144.534	-0.698127	0.762238	0.237762	2920
0110100101111001_0111	1.02306e-06	11.551	6.53622	-0.696274	0.771229	0.228771	7
0100001011001110_0111	5.84606e-07	6.68	3.85441	-0.695308	0.786214	0.213786	4
0100001000101101_0111	2.99611e-05	229.367	35.0583	-0.695041	0.747253	0.252747	205
0111001101010000_0111	5.84606e-07	6.71	3.90373	-0.694207	0.806194	0.193806	4
0110111110101001_0111	1.02306e-06	12.456	7.86052	-0.694101	0.761239	0.238761	7
0110110101100111_0111	4.09224e-06	37.516	13.7185	-0.693664	0.746254	0.253746	28
0000111101110000_0111	0.00330361	22917.7	452.494	-0.693279	0.762238	0.237762	22604
0110110010000011_0111	1.02306e-06	14.671	11.0667	-0.693162	0.753247	0.246753	7
0110100110001000_0111	4.38455e-07	7.493	6.48259	-0.693087	0.745255	0.254745	3
0000111000000011_0111	0.000846364	5869.13	112.788	-0.692716	0.771229	0.228771	5791
0100100010010000_0111	2.73303e-05	237.436	72.8329	-0.692489	0.751249	0.248751	187
0000101011000111_0111	1.87074e-05	140.316	17.7941	-0.692141	0.776224	0.223776	128
0100110010111011_0111	2.33843e-06	54.483	55.6271	-0.691804	0.931069	0.0689311	16
0110001000011001_0111	1.60767e-06	15.122	5.95874	-0.691757	0.775225	0.224775	11
0100011111011010_0111	1.60767e-06	15.459	6.45538	-0.690741	0.761239	0.238761	11
0000110011011001_0111	0.000208412	1481.67	80.7029	-0.689777	0.758242	0.241758	1426
0100101011101100_0111	1.02306e-06	13.681	9.68654	-0.68972	0.763237	0.236763	7
0100110010100100_0111	2.2215e-05	186.323	49.7855	-0.689417	0.746254	0.253746	152
0111111000000100_0111	5.84606e-07	6.535	3.6808	-0.688708	0.777223	0.222777	4
0010000011110000_0011	0.000368887	3008.76	704.479	-0.688117	0.736264	0.263736	2524
0100111010111110_0111	2.77688e-06	26.627	11.089	-0.687802	0.749251	0.250749	19
0100101111101011_0111	8.7691e-07	14.969	13.0471	-0.687434	0.798202	0.201798	6
0100001001000100_0111	5.59761e-05	396.526	19.6971	-0.6867	0.778222	0.221778	383
0110010101001111_0111	6.43067e-06	51.933	11.5759	-0.6853	0.751249	0.248751	44
0100001010111000_0111	1.75382e-05	144.844	36.2685	-0.685002	0.745255	0.254745	120
0100101111111110_0111	7.30758e-07	11.921	10.1062	-0.684828	0.791209	0.208791	5
0100000010010101_0111	4.01917e-05	305.724	44.8676	-0.68477	0.748252	0.251748	275
0110101100000110_0111	5.84606e-07	6.754	4.02414	-0.68437	0.79021	0.20979	4
0110101100001001_0111	7.30758e-07	10.199	7.61508	-0.682725	0.759241	0.240759	5
0110111111101111_0111	1.31536e-06	15.774	9.93084	-0.682118	0.738262	0.261738	9
0100011011101100_0111	1.50536e-05	123.756	30.4389	-0.681891	0.747253	0.252747	103
0110011000100100_0111	0.000174213	1238.77	68.6429	-0.681308	0.763237	0.236763	1192
0110110010101110_0111	1.46152e-07	2.877	2.75925	-0.680256	0.795205	0.204795	1
0100101010011011_0111	5.84606e-07	7.878	5.70435	-0.679832	0.779221	0.220779	4
0100101111111001_0111	4.5307e-06	69.611	56.9007	-0.678568	0.783217	0.216783	31
0000111010101100_0111	0.000366402	2566.93	88.545	-0.676854	0.749251	0.250749	2507
0110110011001001_0111	4.38455e-07	6.884	5.74208	-0.67641	0.767233	0.232767	3
0011001000111111_0011	5.26146e-06	47.69	17.2853	-0.676296	0.735265	0.264735	36
0000100001110011_0111	0.00303571	21059.6	426.948	-0.675969	0.767233	0.232767	20771
0100001010110010_0111	3.79994e-05	288.49	42.192	-0.675246	0.75025	0.24975	260
0000101000010101_0111	0.00013139	916.764	26.3101	-0.675178	0.761239	0.238761	899
0100101010011000_0111	1.75382e-06	20.337	12.3842	-0.673196	0.734266	0.265734	12
0000111010101000_0111	0.00184926	12900.1	367.244	-0.672882	0.748252	0.251748	12653
0000111001100011_0111	0.000613398	4255.74	87.4094	-0.672056	0.758242	0.241758	4197
0110110101001001_0111	1.02306e-06	10.471	5.16545	-0.671965	0.756244	0.243756	7
0111011100110010_0111	1.56382e-05	118.815	17.5843	-0.671906	0.734266	0.265734	107
0010001010001011_0011	8.15526e-05	732.301	259.455	-0.671797	0.73027	0.26973	558
0100001101110110_0111	0.000181959	1269.18	36.0005	-0.671768	0.754246	0.245754	1245
0100011111111100_0111	1.89997e-05	154.339	36.2573	-0.671286	0.744256	0.255744	130
0110101101110110_0111	4.38455e-07	5.515	3.76483	-0.668025	0.774226	0.225774	3
0011001011010101_0011	1.46152e-07	3.338	3.50114	-0.667782	0.808192	0.191808	1
0100101110101000_0111	3.79994e-06	70.012	65.9837	-0.667014	0.813187	0.186813	26
0111100001110101_0111	4.38455e-07	6.406	5.10718	-0.666905	0.791209	0.208791	3
0100011110111011_0111	8.18449e-06	73.131	25.7322	-0.665741	0.73027	0.26973	56
0100000010110111_0111	0.000130075	965.389	113.409	-0.66475	0.742258	0.257742	890
0110110010001011_0111	5.84606e-07	7.86	5.81293	-0.664037	0.747253	0.252747	4
0111110001000011_0111	2.92303e-07	3.989	3.00031	-0.662931	0.797203	0.202797	2
0110011100011010_0111	4.38455e-07	4.787	2.69646	-0.662721	0.806194	0.193806	3
0100101011111111_0111	7.30758e-06	81.418	47.5068	-0.661337	0.729271	0.270729	50
0100100010100011_0111	2.61611e-05	235.085	84.8522	-0.660973	0.73027	0.26973	179
0110111000110001_0111	4.96915e-06	45.805	17.8602	-0.660966	0.726274	0.273726	34
0100001010101010_0111	2.08997e-05	177.018	51.558	-0.6598	0.749251	0.250749	143
0110111100001101_0111	3.06918e-06	30.303	14.1023	-0.659678	0.739261	0.260739	21
0100100001110101_0111	3.84379e-05	351.138	133.818	-0.65864	0.743257	0.256743	263
0100101111111101_0111	1.75382e-06	24.065	18.3435	-0.657727	0.743257	0.256743	12
0100011000100101_0111	0.000669667	4643.18	93.0584	-0.657393	0.746254	0.253746	4582
0110101101101001_0111	1.46152e-07	2.665	2.53322	-0.657267	0.827173	0.172827	1
0100101111001011_0111	1.46152e-07	3.851	4.33862	-0.657121	0.843157	0.156843	1
0100001111010101_0111	5.55376e-06	46.603	13.1221	-0.655611	0.749251	0.250749	38
0011001000000110_0011	1.27152e-05	104.194	26.2788	-0.654293	0.74026	0.25974	87
0110100101010111_0111	1.02306e-06	12.058	7.74006	-0.653483	0.752248	0.247752	7
0110001100001011_0111	3.94609e-06	33.814	10.4287	-0.653388	0.74026	0.25974	27
0110111000110100_0111	8.7691e-07	8.729	4.1851	-0.652075	0.753247	0.246753	6
0100100011011001_0111	7.01528e-06	75.789	42.6227	-0.651977	0.698302	0.301698	48
0100011110100000_0111	0.000198474	1483.87	193.132	-0.651735	0.735265	0.264735	1358
0100110011001000_0111	2.74765e-05	251.157	96.9814	-0.651228	0.711289	0.288711	188
0100011110010111_0111	6.47452e-05	481.932	59.8042	-0.650991	0.729271	0.270729	443
0011001010010111_0011	2.92303e-07	4.254	3.46518	-0.650471	0.777223	0.222777	2
0111101001100010_0111	2.92303e-07	3.697	2.60998	-0.650196	0.801199	0.198801	2
0110111100010011_0111	1.89997e-06	18.804	8.92756	-0.650122	0.747253	0.252747	13
0011001110010000_0011	2.48458e-06	25.356	12.8641	-0.64956	0.739261	0.260739	17
0111101101110001_0111	5.84606e-07	7.609	5.55977	-0.649128	0.769231	0.230769	4
0011001001111111_0011	1.31536e-06	13.171	6.42986	-0.648692	0.75025	0.24975	9
0110111101011011_0111	5.84606e-07	6.47	3.80967	-0.648349	0.758242	0.241758	4
0100001010000101_0111	2.68919e-05	205.656	33.4075	-0.648237	0.746254	0.253746	184
0110101101110101_0111	1.02306e-06	11.959	7.65192	-0.648073	0.749251	0.250749	7
0100111010111111_0111	6.72297e-06	61.318	23.6516	-0.647651	0.734266	0.265734	46
0100101110010100_0111	1.46152e-07	2.362	2.10556	-0.646858	0.799201	0.200799	1
0011001010001000_0011	6.72297e-06	86.186	62.1556	-0.646539	0.701299	0.298701	46
0100111101110111_0111	0.000126567	1027.87	250.391	-0.646461	0.72028	0.27972	866
0110110011000011_0111	1.46152e-07	3.486	3.84924	-0.645842	0.739261	0.260739	1
0100011111010110_0111	1.13998e-05	88.088	15.6301	-0.645423	0.734266	0.265734	78
0110101000110100_0111	1.46152e-07	2.172	1.81816	-0.644606	0.805195	0.194805	1
0110010101000110_0111	3.17149e-05	228.612	18.0312	-0.643996	0.747253	0.252747	217
0110100101000111_0111	4.38455e-07	6.137	4.87175	-0.643916	0.757243	0.242757	3
0110111100110010_0111	2.77688e-06	26.026	10.9412	-0.642162	0.725275	0.274725	19
0100001000000011_0111	0.000656367	4551.06	93.5417	-0.642066	0.74026	0.25974	4491
0100111100010010_0111	2.63073e-06	24.435	10.0227	-0.642043	0.731269	0.268731	18
0111100001110001_0111	2.48458e-06	24.943	12.3715	-0.642039	0.726274	0.273726	17
0010000011010110_0011	5.69991e-06	53.017	21.8341	-0.641976	0.72028	0.27972	39
0110111000111001_0111	1.16921e-06	11.335	5.19709	-0.641705	0.758242	0.241758	8
0111111000010111_0111	1.46152e-07	2.139	1.77619	-0.641262	0.834166	0.165834	1
0110111111111000_0111	1.02306e-06	12.616	8.75872	-0.641189	0.733267	0.266733	7
0111011000100001_0111	6.28452e-05	472.385	66.197	-0.640286	0.728272	0.271728	430
0111111001100101_0111	2.92303e-07	3.773	2.77004	-0.640062	0.78022	0.21978	2
0110111111110101_0111	3.36149e-06	37.569	22.7678	-0.639896	0.712288	0.287712	23
0111101000000001_0111	1.02306e-06	11.157	6.49835	-0.639701	0.742258	0.257742	7
0100011000010000_0111	0.00058066	4020.91	74.9245	-0.639417	0.746254	0.253746	3973
0110110010101001_0111	5.84606e-07	8.031	6.31157	-0.638669	0.726274	0.273726	4
0100110010111010_0111	3.50764e-06	51.5	43.0923	-0.638166	0.844156	0.155844	24
0110110101100101_0111	2.48458e-06	23.297	9.8724	-0.637839	0.737263	0.262737	17
0100100011111101_0111	7.89219e-06	86.595	51.1065	-0.637785	0.704296	0.295704	54
0100011111100000_0111	0.000153898	1130.25	121.576	-0.635372	0.747253	0.252747	1053
0110101100000111_0111	2.48458e-06	28.039	17.3939	-0.634647	0.715285	0.284715	17
0110110000000101_0111	1.88536e-05	158.282	46.1661	-0.634275	0.721279	0.278721	129
0010000011000111_0011	8.31603e-05	696.793	201.506	-0.63419	0.737263	0.262737	569
0100000011111010_0111	2.08997e-05	172.183	46.0319	-0.633973	0.733267	0.266733	143
0011001011110010_0011	1.16921e-06	12.673	7.37336	-0.633768	0.723277	0.276723	8
0011001010000011_0011	2.33843e-05	213.7	84.7611	-0.633546	0.699301	0.300699	160
0010000110010100_0011	4.38455e-07	5.705	4.2725	-0.633119	0.754246	0.245754	3
0110100010001111_0111	4.38455e-07	6.972	6.29069	-0.631409	0.734266	0.265734	3
0100001001101011_0111	2.84996e-05	212.742	28.1066	-0.631239	0.734266	0.265734	195
0100001110100010_0111	2.82073e-05	216.079	36.5903	-0.63074	0.736264	0.263736	193
0110110110010110_0111	1.46152e-07	2.178	1.86864	-0.630406	0.812188	0.187812	1
0110110101001011_0111	1.46152e-07	2.001	1.58919	-0.629881	0.831169	0.168831	1
0100011110111010_0111	7.45373e-06	63.791	20.3314	-0.629125	0.723277	0.276723	51
0110101000000100_0111	1.16921e-06	13.386	8.5667	-0.628713	0.718282	0.281718	8
0110101100001011_0111	4.38455e-07	5.839	4.52057	-0.628019	0.753247	0.246753	3
0100000001110001_0111	0.00276636	19238.8	495.103	-0.627812	0.734266	0.265734	18928
0110110000110001_0111	1.82689e-05	168.135	68.7353	-0.627552	0.728272	0.271728	125
0110110101110010_0111	1.89997e-06	17.282	6.82532	-0.627369	0.745255	0.254745	13
0100111010110111_0111	1.02306e-05	84.683	23.4231	-0.626859	0.731269	0.268731	70
0100011011110010_0111	6.00683e-05	443.082	51.19	-0.626724	0.727273	0.272727	411
0100100010100010_0111	2.7915e-05	239.187	76.897	-0.626643	0.721279	0.278721	191
0110111100011111_0111	1.31536e-06	13.589	7.33852	-0.62533	0.741259	0.258741	9
0100111110110010_0111	5.55376e-06	53.912	25.4523	-0.62517	0.687313	0.312687	38
0110010100000101_0111	0.000638829	4483.48	179.953	-0.625037	0.741259	0.258741	4371
0110110010011011_0111	1.46152e-07	2.783	2.85378	-0.624786	0.793207	0.206793	1
0100001001110000_0111	0.00149732	10376.2	210.24	-0.624116	0.746254	0.253746	10245
0010001010011001_0011	6.63528e-05	638.375	295.873	-0.623156	0.724276	0.275724	454
0100011110111001_0111	2.42612e-05	200.545	55.4521	-0.62297	0.734266	0.265734	166
0111111111100111_0111	2.92303e-07	4.057	3.30283	-0.6228	0.763237	0.236763	2
0100001010111010_0111	8.47679e-06	73.589	25.0552	-0.622186	0.728272	0.271728	58
0000111110010010_0111	6.05068e-05	431.045	27.4088	-0.621881	0.726274	0.273726	414
0011001011101000_0011	5.84606e-07	7.137	5.04576	-0.62171	0.73027	0.26973	4
0011001001010100_0011	2.48458e-06	27.704	17.2473	-0.620618	0.718282	0.281718	17
0111111000110010_0111	2.92303e-07	3.395	2.24945	-0.620151	0.788212	0.211788	2
0110111101000001_0111	3.06918e-06	29.536	13.7678	-0.619997	0.714286	0.285714	21
0111101101110111_0111	1.46152e-07	2.676	2.70376	-0.619877	0.798202	0.201798	1
0100100011011110_0111	2.92303e-07	3.876	3.02784	-0.619584	0.784216	0.215784	2
0100001000001000_0111	0.00014849	1094.63	126.972	-0.619288	0.73027	0.26973	1016
0111100001110000_0111	1.89997e-06	19.003	9.69582	-0.619133	0.742258	0.257742	13
0111101000100111_0111	8.7691e-07	9.332	5.38561	-0.618686	0.731269	0.268731	6
0100001101100010_0111	0.000171144	1194.61	38.1595	-0.618667	0.728272	0.271728	1171
0110100000001101_0111	3.65379e-06	34.831	15.893	-0.618575	0.729271	0.270729	25
0110110010001001_0111	2.48458e-06	25.463	13.6831	-0.618499	0.718282	0.281718	17
0110100110001111_0111	2.92303e-07	4.581	4.17335	-0.618448	0.729271	0.270729	2
0100011110100001_0111	0.00016822	1244.69	151.543	-0.618241	0.734266	0.265734	1151
0100011000000010_0111	0.00088904	6156.75	119.648	-0.616416	0.742258	0.257742	6083
0100100010010001_0111	2.65996e-05	229.879	77.7264	-0.615994	0.699301	0.300699	182
0100101000111000_0111	1.1546e-05	100.73	35.316	-0.615301	0.722278	0.277722	79
0100101011000010_0111	1.16921e-06	12.853	7.892	-0.614926	0.724276	0.275724	8
0000110010010010_0111	9.61677e-05	683.539	41.5744	-0.614297	0.725275	0.274725	658
0100101110010001_0111	4.2384e-06	43.728	23.9949	-0.613798	0.701299	0.298701	29
0100111011000011_0111	1.75382e-06	16.58	7.46521	-0.613513	0.727273	0.272727	12
0110111110011011_0111	1.46152e-07	2.537	2.50538	-0.613481	0.793207	0.206793	1
0110011000011000_0111	2.92303e-06	24.982	8.12353	-0.613281	0.74026	0.25974	20
0110111000100101_0111	4.823e-06	41.588	14.0087	-0.613046	0.726274	0.273726	33
0100101111111000_0111	4.38455e-06	62.18	52.4984	-0.612971	0.739261	0.260739	30
0110011100110101_0111	0.000164421	1161.93	60.2538	-0.612957	0.72028	0.27972	1125
0100001000011010_0111	3.65379e-06	29.572	7.46301	-0.612621	0.751249	0.248751	25
0110110000110011_0111	1.47613e-05	143.295	69.0514	-0.612515	0.701299	0.298701	101
0110111001010001_0111	2.63073e-06	28.097	16.4958	-0.612095	0.708292	0.291708	18
0000111000111100_0111	5.26146e-05	375.468	25.2917	-0.611585	0.738262	0.261738	360
0111110010000000_0111	1.02306e-06	10.78	6.18141	-0.611511	0.731269	0.268731	7
0010000011000110_0011	3.20072e-05	271.053	85.1667	-0.61119	0.716284	0.283716	219
0110111010000010_0111	4.38455e-07	6.326	5.44292	-0.611069	0.706294	0.293706	3
0100111000101111_0111	3.28841e-05	263.96	63.839	-0.610286	0.732268	0.267732	225
0100111100000000_0111	6.67913e-05	550.353	152.98	-0.610232	0.705295	0.294705	457
0100101011001110_0111	1.46152e-07	2.721	2.8258	-0.609031	0.777223	0.222777	1
0110111100010110_0111	8.7691e-07	8.357	3.87822	-0.607753	0.758242	0.241758	6
0100101111010101_0111	4.38455e-07	5.586	4.25896	-0.60719	0.726274	0.273726	3
0110110101101111_0111	1.02306e-06	10.067	5.05134	-0.607166	0.736264	0.263736	7
0111111001010101_0111	2.92303e-07	3.624	2.67615	-0.606842	0.768232	0.231768	2
0100111101100001_0111	5.77299e-05	472.203	127.326	-0.606343	0.709291	0.290709	395
0100111101010010_0111	7.74603e-06	64.624	19.1876	-0.605809	0.71029	0.28971	53
0110111111101101_0111	4.38455e-07	5.666	4.40566	-0.60513	0.735265	0.264735	3
0100001111110010_0111	2.71842e-05	205.628	32.49	-0.604125	0.716284	0.283716	186
0100011011111100_0111	1.27152e-05	101.882	24.6343	-0.604117	0.73027	0.26973	87
0100101111000001_0111	1.60767e-06	17.193	10.259	-0.603665	0.727273	0.272727	11
0100000010111011_0111	2.19227e-05	186.674	60.7611	-0.603577	0.718282	0.281718	150
0011001011100000_0011	4.823e-06	46.914	23.0534	-0.603556	0.706294	0.293706	33
0110011001000110_0111	5.43684e-05	390.213	30.2688	-0.601709	0.734266	0.265734	372
0110101101100111_0111	1.46152e-06	15.72	9.50715	-0.601652	0.72028	0.27972	10
0110101000101100_0111	4.38455e-07	5.295	3.8195	-0.600864	0.737263	0.262737	3
0110111110011111_0111	4.38455e-07	5.924	4.86661	-0.600829	0.725275	0.274725	3
0110111010001010_0111	2.92303e-07	4.353	3.92119	-0.600072	0.729271	0.270729	2
0100101011000110_0111	4.38455e-07	4.666	2.77888	-0.599522	0.757243	0.242757	3
0110100001110010_0111	6.43067e-06	58.126	23.5728	-0.599251	0.702298	0.297702	44
0110101000110011_0111	3.65379e-06	35.315	17.2154	-0.599173	0.696304	0.303696	25
0110111000100011_0111	7.30758e-06	64.025	23.4328	-0.598519	0.712288	0.287712	50
0100111110100110_0111	1.94382e-05	157.971	41.7821	-0.597648	0.711289	0.288711	133
0110110010101111_0111	4.38455e-07	6.77	6.31593	-0.596903	0.717283	0.282717	3
0100011011110101_0111	4.61839e-05	338.458	37.7249	-0.59531	0.731269	0.268731	316
0110111110000110_0111	7.30758e-07	8.476	5.84119	-0.595084	0.721279	0.278721	5
0100111000001110_0111	1.02306e-05	84.442	24.3235	-0.593747	0.716284	0.283716	70
0011001001101010_0011	4.38455e-07	5.119	3.5729	-0.593076	0.753247	0.246753	3
0111101100100000_0111	5.84606e-07	7.685	6.21373	-0.593042	0.727273	0.272727	4
0110011001000010_0111	2.82073e-05	204.769	19.8566	-0.5927	0.73027	0.26973	193
0110100001111001_0111	2.77688e-06	27.714	14.732	-0.591502	0.697303	0.302697	19
0110111101001110_0111	2.92303e-07	3.654	2.79752	-0.591238	0.746254	0.253746	2
0110111110001011_0111	4.38455e-07	5.771	4.69581	-0.590101	0.722278	0.277722	3
0011000011100110_0011	5.55376e-06	48.369	17.5766	-0.589933	0.707293	0.292707	38
0110110100011111_0111	1.60767e-06	15.006	6.79427	-0.589614	0.732268	0.267732	11
0010000100010010_0011	6.89835e-05	511.844	67.6653	-0.588839	0.731269	0.268731	472
0000101101110110_0111	0.000209581	1459.96	44.1823	-0.587476	0.725275	0.274725	1434
0110100001101100_0111	5.84606e-07	6.854	4.86193	-0.58701	0.72028	0.27972	4
0100101011101110_0111	1.75382e-06	19.069	12.0451	-0.58688	0.704296	0.295704	12
0110100100011011_0111	5.84606e-07	6.377	4.05034	-0.586864	0.73027	0.26973	4
0100011110010011_0111	2.7915e-05	212.262	36.2685	-0.586239	0.706294	0.293706	191
0111100001110011_0111	1.89997e-06	18.782	9.8739	-0.585584	0.704296	0.295704	13
0110011100011011_0111	3.21533e-06	26.724	8.08165	-0.584534	0.728272	0.271728	22
0110111111100100_0111	1.02306e-06	11.269	7.3052	-0.584378	0.716284	0.283716	7
0100100011111111_0111	1.05229e-05	110.525	66.0173	-0.583559	0.671329	0.328671	72
0100110010110000_0111	3.40533e-05	293.762	104.264	-0.58277	0.711289	0.288711	233
0111111001110010_0111	5.84606e-07	5.967	3.38339	-0.581369	0.75025	0.24975	4
0100101000111100_0111	8.7691e-07	9.188	5.4897	-0.580724	0.713287	0.286713	6
0100001011000100_0111	2.04612e-06	17.111	5.37006	-0.579323	0.737263	0.262737	14
0110111000101001_0111	4.2384e-06	36.159	12.3716	-0.578663	0.713287	0.286713	29
0110111111101100_0111	5.84606e-07	6.728	4.71659	-0.578383	0.719281	0.280719	4
0011001000000100_0011	6.76682e-05	507.421	76.8275	-0.578191	0.709291	0.290709	463
0100101000110110_0111	3.79994e-06	32.953	12.0277	-0.578082	0.721279	0.278721	26
0110000100001111_0111	1.06691e-05	84.389	19.7098	-0.577834	0.722278	0.277722	73
0100101000001111_0111	8.91525e-06	77.294	28.2133	-0.577529	0.707293	0.292707	61
0100011001111000_0111	0.000233112	1684.81	155.871	-0.576171	0.721279	0.278721	1595
0111101101100000_0111	1.46152e-07	2.551	2.6953	-0.575445	0.804196	0.195804	1
0110111001010000_0111	4.96915e-06	43.811	17.0535	-0.575307	0.711289	0.288711	34
0100011010101100_0111	1.31536e-05	103.926	24.2104	-0.575207	0.71029	0.28971	90
0000111010011110_0111	3.62456e-05	257.743	16.942	-0.575081	0.738262	0.261738	248
0100011001110101_0111	0.000832918	5753.52	94.9423	-0.574191	0.731269	0.268731	5699
0110001001001000_0111	4.38455e-07	5.567	4.47208	-0.574006	0.708292	0.291708	3
0110110101110111_0111	1.24229e-05	102.946	31.2677	-0.573948	0.714286	0.285714	85
0011001011000101_0011	5.84606e-07	7.832	6.69243	-0.572588	0.723277	0.276723	4
0100111000110001_0111	3.47841e-05	282.686	78.1279	-0.571959	0.709291	0.290709	238
0110001000011110_0111	2.92303e-07	3.182	2.06764	-0.571665	0.771229	0.228771	2
0110110110101010_0111	1.46152e-07	2.123	1.96818	-0.570577	0.753247	0.246753	1
0000111001010000_0111	0.00103475	7147.47	118.245	-0.570553	0.723277	0.276723	7080
0111111001010111_0111	2.92303e-07	3.431	2.50949	-0.570236	0.766234	0.233766	2
0111100010000001_0111	2.92303e-07	4.357	4.13626	-0.569838	0.743257	0.256743	2
0110100010001001_0111	1.02306e-06	13.602	11.6052	-0.568884	0.703297	0.296703	7
0110111111100011_0111	8.7691e-07	9.577	6.29458	-0.568267	0.705295	0.294705	6
0110100010000100_0111	1.16921e-06	14.847	12.0496	-0.568235	0.692308	0.307692	8
0011000011111111_0011	3.06918e-06	31.718	18.8662	-0.568105	0.692308	0.307692	21
0000101100110011_0111	0.000407324	2841.3	95.7956	-0.56678	0.734266	0.265734	2787
0100001111000110_0111	1.60767e-06	13.166	3.82558	-0.566188	0.748252	0.251748	11
0011000001010000_0011	0.000184151	1352.58	163.814	-0.565178	0.703297	0.296703	1260
0110010000000110_0111	0.000277834	1951.39	89.1557	-0.565169	0.713287	0.286713	1901
0100110011010010_0111	2.33843e-06	20.828	8.54596	-0.564945	0.715285	0.284715	16
0100101111111010_0111	1.60767e-06	21.563	18.6989	-0.564899	0.709291	0.290709	11
0110110110001001_0111	1.60767e-06	16.657	10.0151	-0.564849	0.709291	0.290709	11
0110100001000010_0111	8.7691e-07	9.673	6.50295	-0.564821	0.689311	0.310689	6
0010001000011010_0011	5.15915e-05	405.262	92.6428	-0.564123	0.699301	0.300699	353
0100101010100110_0111	4.5307e-06	39.909	15.8285	-0.562846	0.705295	0.294705	31
0110110100011000_0111	1.16921e-06	11.221	5.72372	-0.562746	0.712288	0.287712	8
0111111111110001_0111	4.38455e-07	5.301	4.09551	-0.561835	0.726274	0.273726	3
0110100001001011_0111	2.92303e-07	4.058	3.66498	-0.561531	0.717283	0.282717	2
0111100001000001_0111	5.84606e-07	6.583	4.60329	-0.56112	0.709291	0.290709	4
0100010001110010_0111	0.00106398	7371.78	163.944	-0.559838	0.714286	0.285714	7280
0000101001010101_0111	0.000181959	1260.87	28.4039	-0.558867	0.712288	0.287712	1245
0110011001001100_0111	3.50764e-06	28.812	8.61306	-0.558686	0.722278	0.277722	24
0110111011100111_0111	1.16921e-06	12.716	8.4461	-0.558364	0.69031	0.30969	8
0100001111001001_0111	1.89997e-06	17.948	8.86634	-0.558066	0.731269	0.268731	13
0110110100011100_0111	1.46152e-07	1.925	1.65835	-0.557783	0.787213	0.212787	1
0110111000100010_0111	1.27152e-05	104.403	31.2097	-0.557615	0.687313	0.312687	87
0010000101100000_0011	0.00038394	2844.67	390.495	-0.557424	0.711289	0.288711	2627
0010001000010011_0011	0.00226564	15794.8	526.69	-0.556006	0.714286	0.285714	15502
0100111110100111_0111	5.26146e-05	420.498	108.912	-0.555475	0.689311	0.310689	360
0110011100111100_0111	3.94609e-06	31.695	8.45574	-0.555244	0.722278	0.277722	27
0100011001101000_0111	0.000255765	1843.49	168.653	-0.554358	0.704296	0.295704	1750
0100101011011101_0111	2.92303e-07	4.377	4.2885	-0.554273	0.738262	0.261738	2
0100111010101110_0111	9.646e-06	84.169	32.8906	-0.552407	0.697303	0.302697	66
0010000111110010_0011	7.74603e-06	63.675	19.4411	-0.549094	0.695305	0.304695	53
0010001010010111_0011	5.26146e-06	46.819	19.7085	-0.54895	0.692308	0.307692	36
0100001000010110_0111	3.53687e-05	247.191	9.4632	-0.548546	0.736264	0.263736	242
0011001010000010_0011	6.57682e-06	62.993	32.8762	-0.547296	0.671329	0.328671	45
0110100110000011_0111	4.38455e-07	5.685	4.90875	-0.546982	0.698302	0.301698	3
0010001000001100_0011	3.78533e-05	295.103	66.2973	-0.544562	0.69031	0.30969	259
0100110011011110_0111	7.30758e-07	7.605	4.79332	-0.543464	0.718282	0.281718	5
0111110001100011_0111	7.30758e-07	7.564	4.72718	-0.542395	0.721279	0.278721	5
0000110010000110_0111	0.000649644	4527.88	152.949	-0.541859	0.72028	0.27972	4445
0100101010001010_0111	4.38455e-06	43.595	25.1116	-0.541384	0.683317	0.316683	30
0100111000011001_0111	6.28452e-06	50.079	13.0823	-0.541114	0.705295	0.294705	43
0100001111010001_0111	1.84151e-05	144.935	34.997	-0.541046	0.7003	0.2997	126
0011001000011000_0011	1.34459e-05	122.54	56.6177	-0.539407	0.69031	0.30969	92
0100101111001010_0111	1.46152e-07	2.168	2.16667	-0.539075	0.77023	0.22977	1
0110100101100011_0111	5.84606e-07	6.056	3.81778	-0.538533	0.737263	0.262737	4
0110101000001101_0111	4.38455e-07	5.728	5.0687	-0.538205	0.694306	0.305694	3
0011001001011001_0011	7.30758e-07	7.994	5.56641	-0.537869	0.705295	0.294705	5
0100111001110100_0111	2.7038e-05	213.047	52.1521	-0.537792	0.692308	0.307692	185
0010000001001000_0011	0.000246996	1885.75	364.015	-0.537745	0.698302	0.301698	1690
0010000011111000_0011	8.88602e-05	736.154	238.54	-0.537244	0.683317	0.316683	608
0110111010110010_0111	4.38455e-07	5.344	4.37044	-0.53633	0.716284	0.283716	3
0100011001010011_0111	0.000190436	1323.34	37.9284	-0.536221	0.716284	0.283716	1303
0111111000110101_0111	1.46152e-07	1.835	1.56084	-0.534969	0.795205	0.204795	1
0110110100001011_0111	1.89997e-06	16.746	7.00418	-0.534823	0.716284	0.283716	13
0100101110001000_0111	2.92303e-06	39.449	36.3655	-0.53482	0.675325	0.324675	20
0010001011101001_0011	6.57682e-06	63.283	34.1876	-0.534785	0.678322	0.321678	45
0011000001000001_0011	0.000726227	5185.63	405.28	-0.534519	0.697303	0.302697	4969
0100000010100111_0111	0.00017962	1308.2	148.306	-0.534032	0.699301	0.300699	1229
0110110100000111_0111	1.72459e-05	138.455	38.3103	-0.53393	0.685315	0.314685	118
0010000110110100_0011	2.04612e-06	18.651	8.71166	-0.533882	0.699301	0.300699	14
0110111001001011_0111	1.46152e-07	2.004	1.88083	-0.533807	0.774226	0.225774	1
0000101101000001_0111	0.00015419	1072.71	33.2073	-0.533347	0.714286	0.285714	1055
0011001000110100_0011	3.82917e-05	286.592	46.1548	-0.532815	0.693307	0.306693	262
0100101101000100_0111	1.46152e-07	2.982	3.73519	-0.530629	0.641359	0.358641	1
0000111110110011_0111	0.000504077	3527.8	148.658	-0.530082	0.698302	0.301698	3449
0011000011000110_0011	2.33843e-06	22.88	12.9838	-0.529892	0.657343	0.342657	16
0111111110000000_0111	2.92303e-07	3.576	2.98649	-0.527709	0.718282	0.281718	2
0100000001110011_0111	0.00191707	13295.6	339.056	-0.526874	0.706294	0.293706	13117
0011000001110111_0011	0.000228727	1642.98	148.158	-0.526317	0.701299	0.298701	1565
0110100101000110_0111	1.46152e-07	1.98	1.86469	-0.525556	0.759241	0.240759	1
0100001010001000_0111	4.41378e-05	353.378	97.8319	-0.525166	0.678322	0.321678	302
0111111100110001_0111	1.75382e-06	15.822	7.28515	-0.524629	0.695305	0.304695	12
0110101100111000_0111	7.30758e-07	8.228	6.16263	-0.523802	0.695305	0.304695	5
0100111101110000_0111	0.000146298	1149.21	283.441	-0.522913	0.681319	0.318681	1001
0100101001010100_0111	1.60767e-06	15.693	8.98195	-0.522492	0.69031	0.30969	11
0100111110110001_0111	2.83534e-05	229.646	68.2768	-0.522081	0.674326	0.325674	194
0100100011101011_0111	7.16143e-06	69.132	38.684	-0.520422	0.641359	0.358641	49
0000110001010110_0111	7.19066e-05	501.656	18.5576	-0.520325	0.713287	0.286713	492
0010001010001001_0011	0.000147175	1257.5	482.669	-0.518981	0.667333	0.332667	1007
0100011111001000_0111	2.4115e-05	190.682	49.4941	-0.51889	0.66034	0.33966	165
0000111101110110_0111	0.00141884	9814.12	204.536	-0.518819	0.702298	0.297702	9708
0110111111010111_0111	8.7691e-07	10.49	8.67682	-0.517471	0.659341	0.340659	6
0100111110110100_0111	5.11531e-06	42.236	14.0037	-0.51672	0.707293	0.292707	35
0100000010010010_0111	3.59533e-05	263.704	34.2625	-0.516717	0.696304	0.303696	246
0110001101011001_0111	1.46152e-07	2.058	2.05106	-0.515831	0.75025	0.24975	1
0110111111101010_0111	2.92303e-07	3.482	2.87366	-0.515718	0.724276	0.275724	2
0010001000010000_0011	0.00264227	18388.4	601.068	-0.514706	0.712288	0.287712	18079
0110111001011111_0111	5.84606e-07	6.218	4.31104	-0.514493	0.712288	0.287712	4
0000110011000100_0111	0.000385402	2693.58	110.04	-0.514194	0.695305	0.304695	2637
0100111110110110_0111	9.79216e-06	77.557	20.5492	-0.513742	0.696304	0.303696	67
0100011000110010_0111	0.000511238	3534.43	70.9923	-0.513169	0.703297	0.296703	3498
0110100001001100_0111	5.84606e-07	6.371	4.62133	-0.513055	0.681319	0.318681	4
0110110101100100_0111	2.19227e-06	19.629	9.03067	-0.512587	0.699301	0.300699	15
0110110010001100_0111	1.02306e-06	10.297	6.46038	-0.510341	0.681319	0.318681	7
0000111011101100_0111	0.000393148	2751.32	120.191	-0.51018	0.703297	0.296703	2690
0110101001111101_0111	2.92303e-07	3.761	3.45251	-0.510064	0.707293	0.292707	2
0100101010101100_0111	2.19227e-06	22.226	14.1782	-0.509655	0.646354	0.353646	15
0100001000010101_0111	0.000101137	703.493	22.5775	-0.509048	0.706294	0.293706	692
0100101011101011_0111	3.65379e-06	35.086	19.8331	-0.508544	0.644356	0.355644	25
0011000011010110_0011	1.46152e-07	2.761	3.46784	-0.507809	0.586414	0.413586	1
0110111011100100_0111	1.46152e-06	14.67	9.19824	-0.507706	0.665335	0.334665	10
0011000011101000_0011	9.79216e-06	93.698	52.67	-0.506892	0.662338	0.337662	67
0000101101100100_0111	9.2514e-05	643.816	21.3489	-0.50663	0.684316	0.315684	633
0111011101110111_0111	3.7561e-05	280.321	46.0688	-0.506221	0.67033	0.32967	257
0110100000010100_0111	1.02306e-06	9.726	5.3898	-0.50577	0.698302	0.301698	7
0100011111111000_0111	6.43067e-05	494.702	108.225	-0.505446	0.668332	0.331668	440
0100111010001100_0111	1.11075e-05	94.444	36.4954	-0.505379	0.66034	0.33966	76
0100001011010001_0111	9.646e-06	75.286	18.3767	-0.505315	0.703297	0.296703	66
0100011011111010_0111	1.6369e-05	125.682	27.0855	-0.50514	0.684316	0.315684	112
0010001010001101_0011	1.05229e-05	88.915	33.5275	-0.504511	0.664336	0.335664	72
0100100001000100_0111	7.89219e-06	72.687	37.0641	-0.50418	0.667333	0.332667	54
0110101001110101_0111	1.16921e-06	12.646	9.21616	-0.504114	0.662338	0.337662	8
0100110010110110_0111	9.20755e-06	72.731	19.313	-0.503856	0.681319	0.318681	63
0100001011010111_0111	6.72297e-06	53.667	15.2514	-0.502706	0.683317	0.316683	46
0100000011110100_0111	3.47841e-05	257.867	39.5548	-0.502265	0.689311	0.310689	238
0110111000101111_0111	3.94609e-06	33.51	12.9687	-0.501976	0.679321	0.320679	27
0110011100111011_0111	1.30075e-05	100.123	22.1868	-0.501334	0.692308	0.307692	89
0110101001101101_0111	1.46152e-07	2.163	2.32074	-0.501134	0.697303	0.302697	1
0100101010010010_0111	1.16921e-06	10.71	5.40843	-0.501069	0.714286	0.285714	8
0011001010110010_0011	2.52842e-05	213.771	81.4561	-0.500527	0.661339	0.338661	173
0110010100000111_0111	0.000520446	3639.81	157.648	-0.499898	0.678322	0.321678	3561
0110110100101010_0111	4.38455e-07	4.398	2.80383	-0.498604	0.715285	0.284715	3
0100101111111111_0111	3.65379e-06	40.819	31.7822	-0.497732	0.636364	0.363636	25
0110001101001001_0111	2.92303e-07	3.41	2.83477	-0.497394	0.702298	0.297702	2
0110111111111100_0111	8.7691e-07	9.141	6.32528	-0.496579	0.663337	0.336663	6
0100011000011100_0111	6.13837e-06	45.936	7.92671	-0.496549	0.698302	0.301698	42
0110110000000100_0111	1.78305e-05	141.272	38.8223	-0.496415	0.677323	0.322677	122
0110100101000011_0111	2.92303e-07	3.398	2.82127	-0.495522	0.745255	0.254745	2
0011001001001100_0011	7.30758e-07	7.175	4.39246	-0.495167	0.687313	0.312687	5
0110111101110011_0111	1.41767e-05	113.737	33.8229	-0.494842	0.682318	0.317682	97
0111101101110000_0111	2.92303e-07	3.663	3.36225	-0.494609	0.713287	0.286713	2
0011001000011100_0011	1.16921e-06	12.198	8.49181	-0.494358	0.652348	0.347652	8
0011001000111110_0011	1.16921e-06	11.793	7.67405	-0.494263	0.675325	0.324675	8
0100101111101100_0111	1.46152e-07	2.66	3.36091	-0.493914	0.742258	0.257742	1
0100111001100101_0111	2.33843e-05	180.569	41.8397	-0.491615	0.662338	0.337662	160
0110101001101010_0111	5.84606e-07	5.978	4.02588	-0.491321	0.699301	0.300699	4
0110101100000000_0111	4.09224e-06	42.16	28.8339	-0.491089	0.629371	0.370629	28
0110011000000011_0111	5.83145e-05	415.152	32.9771	-0.489794	0.696304	0.303696	399
[truncated: 3,655 more rows]
