# Supplementary material for: Investigating the functional implications of reinforcing feedback loops in transcriptional regulatory networks
Source: Royal Society of Chemistry journal article supplement (doi:10.1039/c4mb00526k), 2014-09-17
Supplement: c4mb00526k4.xlsx [file c4mb00526k4.xlsx]

## Sheet: Sheet1
Regulator	GO-BP term or pathway	genesCount	genesInSet	genesNotInSet	genesDrawn	P-val	FDR	geneHits
BCL11A	REACTOME_IMMUNE_SYSTEM	164	933	19002	2116	1.77326e-11	5.89785e-08	MEF2A,IRF4,STAT3,STAT1,JUN,EGR1,IL6R,PPP2R1A,YWHAZ,KPNA1,MAPK1,UBE2H,EIF4G2,BTRC,HMGB1,CLTC,RICTOR,CALM1,TRIP12,ATF1,VASP,JAK2,EIF4E,SOCS1,LRRC41,PJA2,CAMK2D,MDM2,ATG12,ITPR2,NFKBIA,SYK,MALT1,EIF4A1,CDKN1A,NUP153,IFNGR1,BCL2,DUSP4,PTEN,CREB1,NUP188,PIAS1,KIF3B,ITGAV,DCTN5,ARIH1,PSMD5,PPP2CA,SEC61A2,ASB7,UBE2E2,ITGB1,TRIM25,CD36,EEA1,CTSC,IL6ST,UBE2D3,IRF2,FBXW11,TICAM2,TNFAIP3,ZFYVE20,EIF4A2,NR4A…
BCL11A	BIOCARTA_HIVNEF_PATHWAY	24	58	19877	2116	2.05029e-10	6.81723e-07	NFKB1,CASP6,PTK2,MDM2,NFKBIA,CYCS,BCL2,PARP1,CASP7,APAF1,RASA1,MAP3K5,RB1,BIRC3,TNF,CFLAR,LMNB1,ACTG1,TRAF1,FAS,PRKDC,BIRC2,FADD,CASP8
BCL11A	REACTOME_CYTOKINE_SIGNALING_IN_IMMUNE_SYSTEM	59	270	19665	2116	2.03834e-08	6.77546e-05	IRF4,STAT3,STAT1,EGR1,IL6R,YWHAZ,KPNA1,MAPK1,EIF4G2,BTRC,JAK2,EIF4E,SOCS1,CAMK2D,SYK,EIF4A1,NUP153,IFNGR1,NUP188,PIAS1,ARIH1,TRIM25,IL6ST,IRF2,EIF4A2,IL7,SQSTM1,MAP3K8,ADAR,PIK3CA,ICAM1,RBX1,B2M,IFNAR1,NUP210,RIPK2,TEC,BLNK,NFKB2,IL2RG,IRF5,CIITA,PTAFR,EIF4E2,IL2RB,LCK,PTPN6,NUP62,TAB1,NOD2,NUP54,MX2,ISG20,MT2A,SP100,IFIT3,GBP4,IRF7,MX1
BCL11A	REACTOME_APOPTOTIC_EXECUTION_PHASE	20	54	19881	2116	5.13003e-08	0.000170471	CASP6,KPNA1,HMGB1,PTK2,VIM,HMGB2,CTNNB1,ADD1,CASP7,HIST1H1D,HIST1H1B,HIST1H1C,HIST1H1E,DBNL,PLEC,LMNB1,FNTA,TJP2,BIRC2,CASP8
BCL11A	PID_HIVNEFPATHWAY	15	35	19900	2116	1.38513e-07	0.000460142	NFKB1,CASP6,NFKBIA,CYCS,BCL2,CASP7,APAF1,MAP3K5,BIRC3,TNF,CFLAR,TRAF1,FAS,FADD,CASP8
BCL11A	RNA processing (GO:0006396)	17	44	19891	2116	1.85385e-07	0.000615664	SYNCRIP,HNRNPD,HNRPDL,ADARB1,RBM14-RBM4,CELF2,XRN2,HNRNPU,HNRNPK,HNRNPUL1,HNRNPH3,HNRNPH1,HNRNPF,SETX,RBM4,DDX54,THOC1
BCL11A	cellular component disassembly involved in apoptotic process (GO:0006921)	18	50	19885	2116	3.39244e-07	0.00112629	CASP6,KPNA1,HMGB1,PTK2,VIM,HMGB2,CTNNB1,ADD1,CASP7,DBNL,PMAIP1,PLEC,LMNB1,FNTA,MOAP1,TJP2,BIRC2,CASP8
BCL11A	REACTOME_INTERFERON_SIGNALING	38	159	19776	2116	4.24583e-07	0.00140919	IRF4,STAT1,EGR1,KPNA1,EIF4G2,JAK2,EIF4E,SOCS1,CAMK2D,EIF4A1,NUP153,IFNGR1,NUP188,PIAS1,ARIH1,TRIM25,IRF2,EIF4A2,ADAR,ICAM1,B2M,IFNAR1,NUP210,IRF5,CIITA,PTAFR,EIF4E2,PTPN6,NUP62,NUP54,MX2,ISG20,MT2A,SP100,IFIT3,GBP4,IRF7,MX1
BCL11A	BIOCARTA_FAS_PATHWAY	13	30	19905	2116	6.17664e-07	0.00204941	JUN,CASP6,PTPN13,PARP1,CASP7,RB1,CFLAR,LMNB1,RIPK2,FAS,PRKDC,FADD,CASP8
BCL11A	KEGG_CELL_CYCLE	32	128	19807	2116	9.70579e-07	0.00321941	SMC3,GSK3B,CCND2,YWHAZ,SMAD2,SMAD3,STAG1,MDM2,CDK6,ATM,CDKN1A,HDAC1,GADD45B,DBF4,ORC4,E2F2,YWHAQ,YWHAG,ABL1,RBL1,RB1,RBX1,CDC14A,GADD45A,MCM7,MCM4,CDKN2C,PCNA,PRKDC,TGFB1,BUB1,ANAPC13
BCL11A	BIOCARTA_ATM_PATHWAY	10	20	19915	2116	1.26784e-06	0.00420416	NFKB1,JUN,RAD51,MDM2,ATM,NFKBIA,CDKN1A,NBN,ABL1,GADD45A
BCL11A	ST_ERK1_ERK2_MAPK_PATHWAY	13	32	19903	2116	1.63027e-06	0.00540433	NFKB1,CREB5,MAPK1,ATF1,EIF4E,KLF6,EEF2K,DUSP4,CREB1,DUSP6,MAP3K8,CREB3,BRAF
BCL11A	ST_P38_MAPK_PATHWAY	14	37	19898	2116	2.2412e-06	0.00742733	NFKB1,CREB5,MAPK1,ATF1,EIF4E,EEF2K,CREB1,MAP3K5,CREB3,DUSP1,GADD45A,DUSP10,TAB1,HSPB1
BCL11A	BIOCARTA_NKT_PATHWAY	12	29	19906	2116	2.75561e-06	0.00912934	IFNGR1,CCR1,IL4R,CCR7,CD28,CCR5,CXCR3,IL4,CCL4,CXCR4,CCL3,TGFB1
BCL11A	humoral immune response (GO:0006959)	12	29	19906	2116	2.75561e-06	0.00912934	BCL2,YTHDF2,IL7,CD28,BLNK,POU2AF1,EBI3,LY86,CCR6,BST2,PDCD1,PSMB10
BCL11A	negative regulation of transcription from RNA polymerase II promoter (GO:0000122)	51	256	19679	2116	3.13805e-06	0.0103901	MEF2A,NFKB1,REST,STAT3,STAT1,BHLHE40,RUNX3,TBL1X,DDX5,CTBP1,HMGB1,MTDH,ZMYND8,MDM4,BCOR,BACH1,MYB,PEX2,MDM2,ASXL1,MEIS2,PTCH1,HDAC1,SIRT1,SMARCA2,TBL1XR1,UBE2I,GFI1,CBX6,HIC1,KDM2B,ZHX1,IRF2,HEXIM1,PDE2A,KLF10,FGFR2,RARG,CBX4,ZNF174,KDM1A,CIITA,NFIC,ENO1,EPC1,DUSP22,C12orf52,CRYM,ZBTB32,SP100,IRF7
BCL11A	REACTOME_RNA_POL_I_PROMOTER_OPENING	19	62	19873	2116	3.39298e-06	0.0112307	H3F3B,H2AFZ,MBD2,HIST2H2BE,HIST1H2BD,HIST1H2BJ,HIST1H2AE,HIST1H2BG,HIST1H2BO,HIST1H3G,HIST2H2AC,HIST1H2AC,HIST1H2BC,HIST1H3A,HIST4H4,HIST1H4A,HIST1H4B,HIST1H2BI,HIST1H2BK
BCL11A	PID_PDGFRBPATHWAY	31	129	19806	2116	3.46045e-06	0.0114506	STAT3,STAT1,JUN,JUND,PPP2R1A,YWHAZ,MAPK1,JAK2,ACTR2,PRKCE,S1PR1,PTEN,ITGAV,WASL,PPP2CA,ACTR3,YWHAQ,ABI1,DOK1,YWHAG,ABL1,KSR1,RASA1,ARPC5,PIK3CA,LCK,SIPA1,ACTA2,FGR,BRAF,BLK
BCL11A	BIOCARTA_CHEMICAL_PATHWAY	10	22	19913	2116	4.35011e-06	0.0143902	STAT1,CASP6,PTK2,ATM,CYCS,BCL2,PARP1,CASP7,APAF1,TLN1
BCL11A	PID_MYC_ACTIVPATHWAY	22	79	19856	2116	4.65312e-06	0.0153879	CCND2,MTDH,EIF4E,SMAD3,TRRAP,BCAT1,IREB2,EIF4A1,RCC1,ID2,SUPT7L,NBN,PTMA,LIN28B,PMAIP1,HMGA1,DDX18,ENO1,NPM1,TAF9,GAPDH,HSPD1
BCL11A	KEGG_LYSOSOME	29	121	19814	2116	6.98209e-06	0.0230828	SCARB2,CLTC,AP4E1,LAMP1,AP1S3,AP4M1,CD164,CTSC,LAPTM4A,ARSB,AP1G1,CTSA,LAMP3,AP3M2,AP3S1,HGSNAT,GBA,MFSD8,LAPTM5,GALC,CLN3,CD68,MANBA,LGMN,GGA1,AGA,GLA,CTSZ,TCIRG1
BCL11A	PID_AP1_PATHWAY	20	70	19865	2116	7.10788e-06	0.0234915	ESR1,NR3C1,ETS1,ATF3,JUN,JUND,EGR1,ELF1,HIF1A,MYB,PLAU,CTNNB1,PTEN,CREB1,DMTF1,JUNB,DUSP1,IL4,TGFB1,MT2A
BCL11A	PID_NFKAPPABCANONICALPATHWAY	10	23	19912	2116	7.53697e-06	0.0249021	NFKB1,ATM,NFKBIA,MALT1,UBE2D3,TNFAIP3,TNF,RIPK2,NOD2,BIRC2
BCL11A	REACTOME_ADAPTIVE_IMMUNE_SYSTEM	89	539	19396	2116	8.76531e-06	0.0289518	PPP2R1A,YWHAZ,UBE2H,BTRC,CLTC,RICTOR,CALM1,TRIP12,VASP,SOCS1,LRRC41,PJA2,MDM2,ITPR2,NFKBIA,SYK,MALT1,CDKN1A,PTEN,CREB1,KIF3B,ITGAV,DCTN5,PSMD5,PPP2CA,SEC61A2,ASB7,UBE2E2,ITGB1,CD36,CTSC,UBE2D3,FBXW11,NR4A1,CALM2,AP1G1,CD28,CTSA,MAP3K8,PDCD1LG2,PIK3CA,ICAM1,RBX1,B2M,TAP1,TPP2,ACTR1B,RIPK2,BLNK,PPP2R5A,KIF5B,LNPEP,FBXO17,CD40,ITGAL,LCK,CD79A,PTPN6,SIPA1,EVL,SEC61B,ICAM2,GRAP2,ASB2,PSMB9,CD79B,LRSAM…
BCL11A	BIOCARTA_P53_PATHWAY	8	16	19919	2116	9.59153e-06	0.0316712	MDM2,ATM,CDKN1A,BCL2,APAF1,RB1,GADD45A,PCNA
BCL11A	protein dephosphorylation (GO:0006470)	21	77	19858	2116	1.0402e-05	0.034337	PPP2R1A,SSH1,CTDSP1,DUSP4,PTEN,PTPN13,PPP3CB,PTPN3,FBXW11,CTDSP2,PTPN4,DUSP2,PTPN22,PTPN7,DUSP1,DUSP5,DUSP10,PTPN6,PPM1M,DUSP22,PHPT1
BCL11A	PID_TNFPATHWAY	15	46	19889	2116	1.08386e-05	0.0357675	NFKB1,STAT1,TNIK,TNFAIP3,RFFL,MAP3K5,SQSTM1,BIRC3,TNF,TRAF1,TAB1,BIRC2,FADD,CASP8,SMPD2
BCL11A	KEGG_LEISHMANIA_INFECTION	20	72	19863	2116	1.15624e-05	0.0381445	NFKB1,STAT1,JUN,MAPK1,MARCKSL1,JAK2,NFKBIA,IFNGR1,ITGB1,ITGA4,TNF,IL4,PTPN6,TAB1,NCF2,TGFB1,NCF4,ITGB2,HLA-DMB,CYBA
BCL11A	REACTOME_DOWNREGULATION_OF_SMAD2_3_SMAD4_TRANSCRIPTIONAL_ACTIVITY	9	20	19915	2116	1.20339e-05	0.0396879	SMAD2,SMAD3,SKIL,PPM1A,HDAC1,USP9X,PARP1,UBE2D3,TGIF2
BCL11A	REACTOME_APOPTOSIS_INDUCED_DNA_FRAGMENTATION	7	13	19922	2116	1.25247e-05	0.0412941	KPNA1,HMGB1,HMGB2,HIST1H1D,HIST1H1B,HIST1H1C,HIST1H1E
BCL11A	REACTOME_CASPASE_MEDIATED_CLEAVAGE_OF_CYTOSKELETAL_PROTEINS	7	13	19922	2116	1.25247e-05	0.0412941	CASP6,VIM,ADD1,CASP7,DBNL,PLEC,CASP8
BCL11A	positive regulation of I-kappaB kinase/NF-kappaB cascade (GO:0043123)	30	131	19804	2116	1.36573e-05	0.0450009	MTDH,SLC20A1,ATP2C1,TRIM13,PPM1A,MALT1,TICAM2,TMEM9B,CCR7,UBC,BIRC3,C18orf32,CFLAR,NEK6,SLC35B2,TLR6,RIPK2,CD40,TRAF1,NUP62,BIRC2,UBB,FADD,TNFRSF11A,TRIM38,CASP8,BST2,REL,APOL3,HTR2B
BCL11A	BIOCARTA_DEATH_PATHWAY	12	33	19902	2116	1.54718e-05	0.0509642	NFKB1,CASP6,NFKBIA,CYCS,BCL2,CASP7,APAF1,BIRC3,CFLAR,BIRC2,FADD,CASP8
BCL11A	PID_IL12_2PATHWAY	18	63	19872	2116	1.76518e-05	0.0581275	NFKB1,STAT3,STAT1,JAK2,SOCS1,GADD45B,PPP3CB,CCR5,B2M,STAT4,RIPK2,NFKB2,IL2RG,IL2RB,LCK,IL4,CCL4,CCL3
BCL11A	REACTOME_INTERFERON_GAMMA_SIGNALING	18	63	19872	2116	1.76518e-05	0.0581275	IRF4,STAT1,JAK2,SOCS1,CAMK2D,IFNGR1,PIAS1,IRF2,ICAM1,B2M,IRF5,CIITA,PTAFR,PTPN6,MT2A,SP100,GBP4,IRF7
BCL11A	ST_TUMOR_NECROSIS_FACTOR_PATHWAY	11	29	19906	2116	1.82235e-05	0.0599734	NFKB1,JUN,NFKBIA,TNFAIP3,BIRC3,TNF,CFLAR,NFKB2,BIRC2,FADD,CASP8
BCL11A	PID_SMAD2_3PATHWAY	8	17	19918	2116	1.84568e-05	0.0607229	SMAD2,MAPK1,SMAD3,PPM1A,CTDSP1,NUP153,UBE2I,CTDSP2
BCL11A	inactivation of MAPK activity (GO:0000188)	8	17	19918	2116	1.84568e-05	0.0607229	DUSP4,DUSP6,DUSP2,DUSP1,DUSP5,DUSP10,RGS3,DUSP22
BCL11A	regulation of interferon-gamma-mediated signaling pathway (GO:0060334)	8	17	19918	2116	1.84568e-05	0.0607229	STAT1,JAK2,SOCS1,IFNGR1,PIAS1,HSP90AB1,CDC37,PTPN6
BCL11A	REACTOME_PACKAGING_OF_TELOMERE_ENDS	15	48	19887	2116	2.0055e-05	0.0659207	H2AFZ,HIST2H2BE,HIST1H2BD,HIST1H2BJ,HIST1H2AE,HIST1H2BG,HIST1H2BO,HIST2H2AC,HIST1H2AC,HIST1H2BC,HIST4H4,HIST1H4A,HIST1H4B,HIST1H2BI,HIST1H2BK
BCL11A	REACTOME_MEIOTIC_RECOMBINATION	22	86	19849	2116	2.16984e-05	0.0713008	H3F3B,RAD51,ATM,H2AFZ,NBN,HIST2H2BE,HIST1H2BD,HIST1H2BJ,HIST1H2AE,HIST1H2BG,HIST1H2BO,HIST1H3G,HIST2H2AC,HIST1H2AC,HIST1H2BC,HIST1H3A,MSH4,HIST4H4,HIST1H4A,HIST1H4B,HIST1H2BI,HIST1H2BK
BCL11A	REACTOME_DEPOSITION_OF_NEW_CENPA_CONTAINING_NUCLEOSOMES_AT_THE_CENTROMERE	18	64	19871	2116	2.2627e-05	0.0743298	H2AFZ,HIST2H2BE,CENPP,HIST1H2BD,HIST1H2BJ,HIST1H2AE,HIST1H2BG,HIST1H2BO,HIST2H2AC,HIST1H2AC,HIST1H2BC,HIST4H4,HIST1H4A,NPM1,CENPN,HIST1H4B,HIST1H2BI,HIST1H2BK
BCL11A	MyD88-dependent toll-like receptor signaling pathway (GO:0002755)	20	75	19860	2116	2.30144e-05	0.0755792	MEF2A,NFKB1,JUN,MAPK1,ATF1,NFKBIA,DUSP4,CREB1,TICAM2,DUSP6,UBC,TLR6,RIPK2,NFKB2,TNIP1,TAB1,NOD2,TLR5,HSPD1,UBB
BCL11A	REACTOME_APOPTOSIS	32	148	19787	2116	2.72708e-05	0.0895302	CASP6,KPNA1,HMGB1,PTK2,VIM,HMGB2,CTNNB1,CYCS,BCL2,PSMD5,ADD1,CASP7,NMT1,APAF1,HIST1H1D,HIST1H1B,HIST1H1C,HIST1H1E,DBNL,PMAIP1,TNF,CFLAR,PLEC,LMNB1,FNTA,TJP2,FAS,BIRC2,PSMB9,FADD,CASP8,PSMB10
BCL11A	PID_ERBB1_DOWNSTREAM_PATHWAY	25	105	19830	2116	2.85435e-05	0.0936797	STAT3,STAT1,JUN,EGR1,PPP2R1A,YWHAZ,MAPK1,RICTOR,ATF1,ACTR2,CREB1,WASL,PPP2CA,ACTR3,YWHAQ,ABI1,YWHAG,KSR1,ARPC5,DUSP6,PIK3CA,DUSP1,BRAF,RIN1,RPS6
BCL11A	PID_BCR_5PATHWAY	18	65	19870	2116	2.88186e-05	0.0945537	NFKB1,ETS1,JUN,MAPK1,NFKBIA,SYK,MALT1,PTEN,CD72,PPP3CB,DOK1,RASA1,INPP5D,PIK3CA,BLNK,CD79A,PTPN6,CD79B
BCLAF1	REACTOME_RNA_POL_I_PROMOTER_OPENING	46	62	19873	1976	8.37069e-35	2.78409e-31	H3F3B,HIST2H2BE,HIST2H3D,HIST1H3B,HIST1H2BD,HIST2H2AA4,HIST1H2BJ,HIST1H2AE,HIST1H2AD,HIST1H2AJ,HIST1H3I,HIST1H2AB,HIST1H3H,HIST1H2BB,HIST1H2BG,HIST1H2BF,HIST1H2BO,HIST1H2BM,HIST1H2BN,HIST1H3G,HIST1H3J,HIST1H3F,HIST2H2AC,HIST1H2AC,HIST1H3C,HIST1H2BC,HIST1H2BA,HIST1H2BL,HIST2H2AA3,HIST3H2BB,HIST1H3D,HIST1H3A,HIST1H4H,HIST1H4J,HIST1H4K,HIST1H4L,HIST4H4,HIST1H4I,HIST1H4E,HIST1H4A,HIST1H4C,HIST1H4B,HI…
BCLAF1	REACTOME_PACKAGING_OF_TELOMERE_ENDS	37	48	19887	1976	1.25006e-29	4.15644e-26	TERF2IP,HIST2H2BE,HIST1H2BD,HIST2H2AA4,HIST1H2BJ,HIST1H2AE,HIST1H2AD,HIST1H2AJ,HIST1H2AB,HIST1H2BB,HIST1H2BG,HIST1H2BF,HIST1H2BO,HIST1H2BM,HIST1H2BN,HIST2H2AC,HIST1H2AC,HIST1H2BC,HIST1H2BA,HIST1H2BL,HIST2H2AA3,HIST3H2BB,TERF2,HIST1H4H,HIST1H4J,HIST1H4K,HIST1H4L,HIST4H4,HIST1H4I,HIST1H4E,HIST1H4A,HIST1H4C,HIST1H4B,HIST1H4D,HIST1H2BH,HIST1H2BI,HIST1H2BK
BCLAF1	REACTOME_RNA_POL_I_TRANSCRIPTION	51	89	19846	1976	1.27306e-29	4.23164e-26	CBX3,H3F3B,HIST2H2BE,HIST2H3D,HIST1H3B,HIST1H2BD,HIST2H2AA4,HIST1H2BJ,HIST1H2AE,HIST1H2AD,HIST1H2AJ,HIST1H3I,HIST1H2AB,HIST1H3H,HIST1H2BB,HIST1H2BG,HIST1H2BF,HIST1H2BO,HIST1H2BM,HIST1H2BN,HIST1H3G,HIST1H3J,HIST1H3F,HIST2H2AC,HIST1H2AC,HIST1H3C,HIST1H2BC,HIST1H2BA,HIST1H2BL,HIST2H2AA3,HIST3H2BB,HIST1H3D,HIST1H3A,POLR1C,HIST1H4H,HIST1H4J,HIST1H4K,HIST1H4L,HIST4H4,HIST1H4I,HIST1H4E,HIST1H4A,HIST1H4C…
BCLAF1	REACTOME_TRANSCRIPTION	81	210	19725	1976	1.83899e-29	6.11097e-26	CCNT2,TAF1,BRF2,TBP,ZNF143,CBX3,H3F3B,CTDP1,SRSF7,NCBP1,GTF3C3,NCBP2,SRSF2,HIST2H2BE,SNRPD3,CDK9,SNAPC3,HIST2H3D,HIST1H3B,HIST1H2BD,HIST2H2AA4,HIST1H2BJ,HIST1H2AE,HIST1H2AD,HIST1H2AJ,HIST1H3I,HIST1H2AB,HIST1H3H,HIST1H2BB,HIST1H2BG,HIST1H2BF,HIST1H2BO,HIST1H2BM,HIST1H2BN,HIST1H3G,HIST1H3J,HIST1H3F,HIST2H2AC,HIST1H2AC,HIST1H3C,HIST1H2BC,HIST1H2BA,HIST1H2BL,HIST2H2AA3,HIST3H2BB,HIST1H3D,HIST1H3A,TCE…
BCLAF1	REACTOME_RNA_POL_I_RNA_POL_III_AND_MITOCHONDRIAL_TRANSCRIPTION	60	122	19813	1976	2.20355e-29	7.32019e-26	BRF2,TBP,ZNF143,CBX3,H3F3B,GTF3C3,HIST2H2BE,SNAPC3,HIST2H3D,HIST1H3B,HIST1H2BD,HIST2H2AA4,HIST1H2BJ,HIST1H2AE,HIST1H2AD,HIST1H2AJ,HIST1H3I,HIST1H2AB,HIST1H3H,HIST1H2BB,HIST1H2BG,HIST1H2BF,HIST1H2BO,HIST1H2BM,HIST1H2BN,HIST1H3G,HIST1H3J,HIST1H3F,HIST2H2AC,HIST1H2AC,HIST1H3C,HIST1H2BC,HIST1H2BA,HIST1H2BL,HIST2H2AA3,HIST3H2BB,HIST1H3D,HIST1H3A,POLR3E,POLR1C,HIST1H4H,HIST1H4J,HIST1H4K,HIST1H4L,HIST4H…
BCLAF1	REACTOME_DEPOSITION_OF_NEW_CENPA_CONTAINING_NUCLEOSOMES_AT_THE_CENTROMERE	42	64	19871	1976	2.28599e-28	7.59178e-25	HIST2H2BE,CENPP,HIST1H2BD,HIST2H2AA4,HIST1H2BJ,HIST1H2AE,HIST1H2AD,HIST1H2AJ,HIST1H2AB,HIST1H2BB,HIST1H2BG,HIST1H2BF,HIST1H2BO,HIST1H2BM,HIST1H2BN,HIST2H2AC,HIST1H2AC,HIST1H2BC,HIST1H2BA,HIST1H2BL,HIST2H2AA3,HIST3H2BB,CENPO,ITGB3BP,HIST1H4H,HIST1H4J,HIST1H4K,HIST1H4L,HIST4H4,HIST1H4I,HIST1H4E,HIST1H4A,HIST1H4C,NPM1,RUVBL1,CENPN,HIST1H4B,HIST1H4D,HIST1H2BH,HIST1H2BI,MLF1IP,HIST1H2BK
BCLAF1	KEGG_SYSTEMIC_LUPUS_ERYTHEMATOSUS	63	140	19795	1976	6.5026e-28	2.15886e-24	H3F3B,SNRPD1,HIST2H2BE,SNRPD3,HIST2H3D,HIST1H3B,HIST1H2AA,HIST1H2BD,HIST2H2AA4,HIST1H2BJ,HIST1H2AE,HIST1H2AD,HIST1H2AJ,HIST1H3I,HIST1H2AG,HIST1H2AH,HIST1H2AB,HIST1H2AI,HIST2H2AB,HIST1H3H,HIST1H2BB,HIST1H2BG,HIST1H2BF,HIST1H2BO,HIST1H2AM,HIST1H2BM,HIST1H2AL,HIST1H2BN,HIST1H3G,HIST1H3J,HIST1H3F,HIST2H2AC,HIST1H2AC,HIST1H3C,HIST1H2BC,HIST1H2BA,HIST1H2BL,HIST2H2AA3,HIST3H2BB,HIST1H3D,HIST1H3A,HIST3H2…
BCLAF1	REACTOME_MEIOTIC_RECOMBINATION	48	86	19849	1976	2.7248e-27	9.0436e-24	H3F3B,NBN,HIST2H2BE,HIST2H3D,HIST1H3B,HIST1H2BD,HIST2H2AA4,HIST1H2BJ,HIST1H2AE,HIST1H2AD,HIST1H2AJ,HIST1H3I,HIST1H2AB,HIST1H3H,HIST1H2BB,HIST1H2BG,HIST1H2BF,HIST1H2BO,HIST1H2BM,HIST1H2BN,HIST1H3G,HIST1H3J,HIST1H3F,HIST2H2AC,HIST1H2AC,HIST1H3C,HIST1H2BC,HIST1H2BA,HIST1H2BL,HIST2H2AA3,HIST3H2BB,HIST1H3D,HIST1H3A,MSH4,HIST1H4H,HIST1H4J,HIST1H4K,HIST1H4L,HIST4H4,HIST1H4I,HIST1H4E,HIST1H4A,HIST1H4C,HI…
BCLAF1	REACTOME_AMYLOIDS	47	83	19852	1976	3.64712e-27	1.21011e-23	H3F3B,HIST2H2BE,HIST2H3D,HIST1H3B,HIST1H2BD,HIST2H2AA4,HIST1H2BJ,HIST1H2AE,HIST1H2AD,HIST1H2AJ,HIST1H3I,HIST1H2AB,HIST1H3H,HIST1H2BB,HIST1H2BG,HIST1H2BF,HIST1H2BO,HIST1H2BM,HIST1H2BN,HIST1H3G,HIST1H3J,HIST1H3F,HIST2H2AC,HIST1H2AC,HIST1H3C,HIST1H2BC,HIST1H2BA,HIST1H2BL,HIST2H2AA3,HIST3H2BB,HIST1H3D,HIST1H3A,B2M,HIST1H4H,HIST1H4J,HIST1H4K,HIST1H4L,HIST4H4,HIST1H4I,HIST1H4E,HIST1H4A,HIST1H4C,HIST1H4…
BCLAF1	REACTOME_MEIOSIS	55	116	19819	1976	4.33431e-26	1.43769e-22	SMC3,H3F3B,STAG2,STAG1,TERF2IP,NBN,HIST2H2BE,HIST2H3D,HIST1H3B,HIST1H2BD,HIST2H2AA4,HIST1H2BJ,HIST1H2AE,HIST1H2AD,HIST1H2AJ,HIST1H3I,HIST1H2AB,HIST1H3H,HIST1H2BB,HIST1H2BG,HIST1H2BF,HIST1H2BO,HIST1H2BM,HIST1H2BN,HIST1H3G,HIST1H3J,HIST1H3F,HIST2H2AC,HIST1H2AC,HIST1H3C,HIST1H2BC,HIST1H2BA,HIST1H2BL,HIST2H2AA3,HIST3H2BB,HIST1H3D,HIST1H3A,TERF2,LMNB1,MSH4,HIST1H4H,HIST1H4J,HIST1H4K,HIST1H4L,HIST4H4,H…
BCLAF1	REACTOME_MEIOTIC_SYNAPSIS	42	73	19862	1976	6.32019e-25	2.09577e-21	SMC3,STAG2,STAG1,TERF2IP,HIST2H2BE,HIST1H2BD,HIST2H2AA4,HIST1H2BJ,HIST1H2AE,HIST1H2AD,HIST1H2AJ,HIST1H2AB,HIST1H2BB,HIST1H2BG,HIST1H2BF,HIST1H2BO,HIST1H2BM,HIST1H2BN,HIST2H2AC,HIST1H2AC,HIST1H2BC,HIST1H2BA,HIST1H2BL,HIST2H2AA3,HIST3H2BB,TERF2,LMNB1,HIST1H4H,HIST1H4J,HIST1H4K,HIST1H4L,HIST4H4,HIST1H4I,HIST1H4E,HIST1H4A,HIST1H4C,HIST1H4B,HIST1H4D,HIST1H2BH,HIST1H2BI,HIST1H2BK,ATR
BCLAF1	REACTOME_TELOMERE_MAINTENANCE	41	75	19860	1976	3.51497e-23	1.16521e-19	TERF2IP,HIST2H2BE,HIST1H2BD,HIST2H2AA4,HIST1H2BJ,HIST1H2AE,HIST1H2AD,HIST1H2AJ,HIST1H2AB,HIST1H2BB,HIST1H2BG,HIST1H2BF,HIST1H2BO,HIST1H2BM,HIST1H2BN,HIST2H2AC,HIST1H2AC,HIST1H2BC,HIST1H2BA,HIST1H2BL,HIST2H2AA3,HIST3H2BB,TERF2,LIG1,HIST1H4H,HIST1H4J,HIST1H4K,HIST1H4L,HIST4H4,HIST1H4I,HIST1H4E,HIST1H4A,HIST1H4C,PCNA,RUVBL1,HIST1H4B,HIST1H4D,HIST1H2BH,HIST1H2BI,HIST1H2BK,RFC2
BCLAF1	REACTOME_CHROMOSOME_MAINTENANCE	52	122	19813	1976	4.59037e-22	1.52125e-18	SMC3,STAG2,STAG1,TERF2IP,HIST2H2BE,CENPP,HIST1H2BD,HIST2H2AA4,HIST1H2BJ,HIST1H2AE,HIST1H2AD,HIST1H2AJ,HIST1H2AB,HIST1H2BB,HIST1H2BG,HIST1H2BF,HIST1H2BO,HIST1H2BM,HIST1H2BN,HIST2H2AC,HIST1H2AC,HIST1H2BC,HIST1H2BA,HIST1H2BL,HIST2H2AA3,HIST3H2BB,CENPO,ITGB3BP,TERF2,LMNB1,LIG1,HIST1H4H,HIST1H4J,HIST1H4K,HIST1H4L,HIST4H4,HIST1H4I,HIST1H4E,HIST1H4A,HIST1H4C,NPM1,PCNA,RUVBL1,CENPN,HIST1H4B,HIST1H4D,HIST…
BCLAF1	gene expression (GO:0010467)	143	716	19219	1976	5.43191e-17	1.79959e-13	CCNT2,NR3C1,TAF1,BRF2,TBP,ZNF143,CTDP1,HNRNPD,PCBP1,EEF1A1,RBPJ,SRSF7,ADARB1,ANP32A,SF3B3,SNRPD1,NCBP1,PSMD11,EIF4E,HNRNPA2B1,ZFP36,PCBP2,HNRNPU,LSM5,RPL37,GTF3C3,EIF4A1,HNRNPK,HNRNPUL1,PSMD1,ZFP36L1,HNRNPA1,MED4,RAN,NCBP2,PAIP1,SRSF2,CNOT1,POLR3G,PSMC2,SNRPD3,HNRNPF,CDK9,SNAPC3,EIF3A,TCEB2,EIF4A2,TAF12,EDC4,PSMF1,FUS,SMG7,RPL15,CD2BP2,POLR2A,MARS,UBC,GARS,TAF10,SF3A3,YARS,SNRPB,TRAM1,UPF2,RPL37A…
BCLAF1	REACTOME_CELL_CYCLE	95	421	19514	1976	3.60716e-15	1.19469e-11	MYC,SMC3,CCND2,BTRC,STAG2,PSMD11,CLASP1,RRM2,STAG1,NSL1,MDM2,CDK6,CDKN1A,DBF4,ORC4,PSMD1,TERF2IP,PCM1,HIST2H2BE,BUB3,PSMC2,CENPP,YWHAG,HIST1H2BD,HIST2H2AA4,HIST1H2BJ,HIST1H2AE,HIST1H2AD,HIST1H2AJ,HIST1H2AB,HIST1H2BB,HIST1H2BG,HIST1H2BF,HIST1H2BO,HIST1H2BM,HIST1H2BN,HIST2H2AC,HIST1H2AC,HIST1H2BC,HIST1H2BA,HIST1H2BL,HIST2H2AA3,HIST3H2BB,PSMF1,TUBGCP3,CENPO,CHEK1,ITGB3BP,TUBB,ORC5,PCNT,RAD1,PSMB8,TE…
BCLAF1	KEGG_RIBOSOME	35	88	19847	1976	1.90162e-14	6.29625e-11	RPL37,RPL15,RPL37A,MRPL13,RPS3A,RPL29,RPL41,RPSA,RPL10,RPL7A,RPS27A,RPS18,RPL36A,RPL27,RPL26,RPL38,RPS15,RPS20,RPL11,RPL5,RPLP0,RPS4X,RPS6,RPS25,RPS12,RPLP2,RPL3,RPL18,RPS2,RPS15A,RPL31,RPS7,RPL24,RPL9,RPL12
BCLAF1	translational elongation (GO:0006414)	38	105	19830	1976	6.84049e-14	2.2642e-10	EEF1A1,EEF2K,RPL37,RPL15,RPL37A,RPS3A,RPL29,TUFM,RPL41,RPSA,RPL10,RPL7A,RPS27A,RPS18,RPL36A,RPL27,RPL26,RPL38,RPS15,RPS20,RPS14,RPL11,RPL5,RPLP0,RPS4X,RPS6,RPS25,RPS12,RPLP2,RPL3,RPL18,RPS2,RPS15A,RPL31,RPS7,RPL24,RPL9,RPL12
BCLAF1	viral infectious cycle (GO:0019058)	38	107	19828	1976	1.39554e-13	4.61786e-10	RPL37,RAN,KPNB1,RPL15,RPL37A,RPS3A,RPL29,RPL41,RPSA,RPL10,SLC25A6,RPL7A,RPS27A,RPS18,RPL36A,RPL27,RPL26,RPL38,RPS15,RPS20,RPS14,RPL11,RPL5,RPLP0,RPS4X,RPS6,RPS25,RPS12,RPLP2,RPL3,RPL18,RPS2,RPS15A,RPL31,RPS7,RPL24,RPL9,RPL12
BCLAF1	viral reproduction (GO:0016032)	77	328	19607	1976	1.40328e-13	4.64206e-10	CCNT2,TAF1,TBP,CTDP1,BTRC,NCBP1,LIG4,PSMD11,RPL37,NUP153,PSMD1,RAN,NCBP2,PSMC2,CDK9,KPNB1,TCEB2,TAF12,PSMF1,BANF1,RPL15,POLR2A,AP1G1,UBC,TAF10,RBX1,B2M,RPL37A,PSMB8,PPIA,HMGA1,NUP205,POLR2C,RPS3A,GTF2H4,NUP62,MNAT1,RPL29,RANBP1,RPL41,AP2S1,RPSA,RPL10,NUP54,SLC25A6,NUP107,RPL7A,RPS27A,RPS18,RPL36A,PSMD6,RPL27,RPL26,RPL38,RPS15,RPS20,RPS14,RPL11,RPL5,RPLP0,RPS4X,RPS6,RPS25,RPS12,RPLP2,RPL3,RPL18,RP…
BCLAF1	translational initiation (GO:0006413)	44	139	19796	1976	2.67102e-13	8.83306e-10	EIF4E,RPL37,EIF4A1,PAIP1,EIF2D,EIF3A,EIF4A2,RPL15,RPL37A,RPS3A,RPL29,EIF3F,EIF3D,RPL41,RPSA,RPL10,RPL7A,RPS27A,RPS18,RPL36A,RPL27,RPL26,RPL38,EIF2B4,RPS15,RPS20,RPS14,RPL11,RPL5,RPLP0,RPS4X,RPS6,RPS25,RPS12,RPLP2,RPL3,RPL18,RPS2,RPS15A,RPL31,RPS7,RPL24,RPL9,RPL12
BCLAF1	viral transcription (GO:0019083)	35	98	19837	1976	9.16583e-13	3.03022e-09	RPL37,RPL15,RPL37A,RPS3A,RPL29,RPL41,RPSA,RPL10,RPL7A,RPS27A,RPS18,RPL36A,RPL27,RPL26,RPL38,RPS15,RPS20,RPS14,RPL11,RPL5,RPLP0,RPS4X,RPS6,RPS25,RPS12,RPLP2,RPL3,RPL18,RPS2,RPS15A,RPL31,RPS7,RPL24,RPL9,RPL12
BCLAF1	nuclear-transcribed mRNA catabolic process, nonsense-mediated decay (GO:0000184)	41	128	19807	1976	9.94876e-13	3.28807e-09	NCBP1,RPL37,NCBP2,GSPT1,SMG7,RPL15,UPF2,RPL37A,PNRC2,RPS3A,RPL29,RPL41,RPSA,RPL10,RPL7A,RPS27A,RPS18,RPL36A,RPL27,RPL26,RPL38,RPS15,RPS20,RPS14,RPL11,RPL5,RPLP0,RPS4X,RPS6,RPS25,RPS12,RPLP2,RPL3,RPL18,RPS2,RPS15A,RPL31,RPS7,RPL24,RPL9,RPL12
BCLAF1	translational termination (GO:0006415)	35	100	19835	1976	1.84486e-12	6.09543e-09	RPL37,RPL15,RPL37A,RPS3A,RPL29,RPL41,RPSA,RPL10,RPL7A,RPS27A,RPS18,RPL36A,RPL27,RPL26,RPL38,RPS15,RPS20,RPS14,RPL11,RPL5,RPLP0,RPS4X,RPS6,RPS25,RPS12,RPLP2,RPL3,RPL18,RPS2,RPS15A,RPL31,RPS7,RPL24,RPL9,RPL12
BCLAF1	REACTOME_METABOLISM_OF_RNA	73	330	19605	1976	1.25881e-11	4.15784e-08	DCP1A,HNRNPD,ANP32A,SNRPD1,NCBP1,PSMD11,EIF4E,ZFP36,LSM5,RPL37,EIF4A1,NUP153,PSMD1,ZFP36L1,NCBP2,PAIP1,PSMC2,SNRPD3,EIF4A2,EDC4,PSMF1,SMG7,RPL15,SNRPB,UPF2,RPL37A,PSMB8,SNRPE,NUP205,GEMIN7,RPS3A,NUP62,RPL29,RPL41,RPSA,TGS1,RPL10,NUP54,NUP107,RPL7A,RPS27A,RPS18,RPL36A,PSMD6,RPL27,RPL26,RPL38,EXOSC6,EXOSC8,RPS15,RPS20,RPS14,RPL11,RPL5,RPLP0,RPS4X,EXOSC4,RPS6,RPS25,RPS12,RPLP2,RPL3,RPL18,RPS2,RPS15A…
BCLAF1	RNA metabolic process (GO:0016070)	68	298	19637	1976	1.33399e-11	4.40483e-08	HNRNPD,ANP32A,SNRPD1,NCBP1,PSMD11,EIF4E,ZFP36,LSM5,RPL37,EIF4A1,PSMD1,ZFP36L1,NCBP2,CNOT1,PSMC2,SNRPD3,EIF4A2,EDC4,PSMF1,SMG7,RPL15,UBC,SNRPB,UPF2,RPL37A,PSMB8,SNRPE,GEMIN7,RPS3A,RPL29,RPL41,RPSA,TGS1,RPL10,RPL7A,RPS27A,RPS18,RPL36A,PSMD6,RPL27,RPL26,RPL38,EXOSC6,EXOSC8,RPS15,RPS20,RPS14,RPL11,RPL5,RPLP0,RPS4X,EXOSC4,RPS6,RPS25,RPS12,RPLP2,RPL3,RPL18,RPS2,RPS15A,PSMB1,RPL31,RPS7,RPL24,RPL9,RPL12,…
BCLAF1	SRP-dependent cotranslational protein targeting to membrane (GO:0006614)	37	119	19816	1976	2.98985e-11	9.86948e-08	RPL37,RPL15,TRAM1,RPL37A,SEC11C,RPS3A,RPL29,RPL41,RPSA,RPL10,RPL7A,RPS27A,RPS18,RPL36A,RPL27,RPL26,RPL38,RPS15,RPS20,RPS14,RPL11,RPL5,RPLP0,RPS4X,RPS6,RPS25,RPS12,RPLP2,RPL3,RPL18,RPS2,RPS15A,RPL31,RPS7,RPL24,RPL9,RPL12
BCLAF1	mRNA metabolic process (GO:0016071)	63	274	19661	1976	4.9325e-11	1.62772e-07	HNRNPD,ANP32A,NCBP1,PSMD11,EIF4E,ZFP36,LSM5,RPL37,EIF4A1,PSMD1,ZFP36L1,NCBP2,PAIP1,CNOT1,PSMC2,EIF4A2,EDC4,PSMF1,SMG7,RPL15,UBC,UPF2,RPL37A,PSMB8,RPS3A,RPL29,RPL41,RPSA,RPL10,RPL7A,RPS27A,RPS18,RPL36A,PSMD6,RPL27,RPL26,RPL38,EXOSC6,EXOSC8,RPS15,RPS20,RPS14,RPL11,RPL5,RPLP0,RPS4X,EXOSC4,RPS6,RPS25,RPS12,RPLP2,RPL3,RPL18,RPS2,RPS15A,PSMB1,RPL31,RPS7,RPL24,RPL9,RPL12,PSMB10,RQCD1
BCLAF1	cellular protein metabolic process (GO:0044267)	81	404	19531	1976	2.06937e-10	6.82685e-07	EEF1A1,SAR1B,ALG10B,FUT8,UGGT1,EIF4E,C1GALT1,GRPEL2,RPL37,EDEM1,EIF4A1,B4GALT6,TOMM22,GALNT7,MAN1A2,PIGV,CCT6A,MCFD2,EIF3A,MLEC,EIF4A2,RPL15,CCT4,TIMM9,TRAM1,RPL37A,SEC24C,SEC13,GMPPB,EIF5B,TIMM10,GFER,TUBA1B,SEC11C,RPS3A,TOMM6,RPL29,EIF3F,ACTB,EIF3D,RPL41,CCT7,DPAGT1,RPSA,RPL10,SLC25A6,ALG10,RPL7A,RPS27A,RPS18,PIGL,RPL36A,RPL27,RPL26,ALG3,RPL38,EIF2B4,ALG5,RPS15,RPS20,RPS14,RPL11,RPL5,RPLP0,TUBA…
BCLAF1	CenH3-containing nucleosome assembly at centromere (GO:0034080)	18	37	19898	1976	2.37693e-10	7.83913e-07	CENPP,CENPO,ITGB3BP,HIST1H4H,HIST1H4J,HIST1H4K,HIST1H4L,HIST4H4,HIST1H4I,HIST1H4E,HIST1H4A,HIST1H4C,NPM1,RUVBL1,CENPN,HIST1H4B,HIST1H4D,MLF1IP
BCLAF1	nucleosome assembly (GO:0006334)	20	45	19890	1976	2.69934e-10	8.89974e-07	ASF1A,CENPP,BRD2,CENPO,ITGB3BP,HIST1H4H,HIST1H4J,HIST1H4K,HIST1H4L,HIST4H4,HIST1H4I,HIST1H4E,HIST1H4A,HIST1H4C,NPM1,RUVBL1,CENPN,HIST1H4B,HIST1H4D,MLF1IP
BCLAF1	REACTOME_METABOLISM_OF_MRNA	62	284	19651	1976	6.65502e-10	2.19349e-06	DCP1A,HNRNPD,ANP32A,NCBP1,PSMD11,EIF4E,ZFP36,LSM5,RPL37,EIF4A1,PSMD1,ZFP36L1,NCBP2,PAIP1,PSMC2,EIF4A2,EDC4,PSMF1,SMG7,RPL15,UPF2,RPL37A,PSMB8,RPS3A,RPL29,RPL41,RPSA,RPL10,RPL7A,RPS27A,RPS18,RPL36A,PSMD6,RPL27,RPL26,RPL38,EXOSC6,EXOSC8,RPS15,RPS20,RPS14,RPL11,RPL5,RPLP0,RPS4X,EXOSC4,RPS6,RPS25,RPS12,RPLP2,RPL3,RPL18,RPS2,RPS15A,PSMB1,RPL31,RPS7,RPL24,RPL9,RPL12,PSMB10,RQCD1
BCLAF1	regulation of gene silencing (GO:0060968)	9	11	19924	1976	8.9817e-10	2.95947e-06	HIST1H3B,HIST1H3I,HIST1H3H,HIST1H3G,HIST1H3J,HIST1H3F,HIST1H3C,HIST1H3D,HIST1H3A
BCLAF1	REACTOME_PROCESSING_OF_CAPPED_INTRON_CONTAINING_PRE_MRNA	38	140	19795	1976	1.51446e-09	4.98863e-06	HNRNPD,PCBP1,SRSF7,SF3B3,SNRPD1,NCBP1,EIF4E,HNRNPA2B1,PCBP2,HNRNPU,NUP153,HNRNPK,HNRNPUL1,HNRNPA1,NCBP2,SRSF2,SNRPD3,HNRNPF,FUS,CD2BP2,POLR2A,SF3A3,SNRPB,DDX23,SNRPE,SLBP,SF3B14,NUP205,U2AF1,POLR2C,CPSF3,NUP62,TXNL4A,NUP54,NUP107,SNRNP200,PRPF6,CPSF1
BCLAF1	nuclear mRNA splicing, via spliceosome (GO:0000398)	44	177	19758	1976	2.1497e-09	7.07897e-06	SYNCRIP,HNRNPD,SRRM2,PCBP1,SRSF7,DDX5,SF3B3,SNRPD1,TRA2B,NCBP1,HNRNPA2B1,PCBP2,HNRNPU,PPIL1,ISY1,HNRNPK,HNRNPUL1,HNRNPA1,CWC27,NCBP2,SRSF2,SNRPD3,HNRNPF,FUS,CD2BP2,POLR2A,SF3A3,DHX8,SNRPB,DDX23,SNRPE,PPIL3,SF3B14,GEMIN7,U2AF1,POLR2C,CPSF3,FRG1,TXNL4A,SNRNP200,AQR,PRPF6,CPSF1,WDR83
BCLAF1	REACTOME_MRNA_PROCESSING	41	161	19774	1976	3.19115e-09	1.05053e-05	HNRNPD,PCBP1,SRSF7,ADARB1,SF3B3,SNRPD1,NCBP1,EIF4E,HNRNPA2B1,PCBP2,HNRNPU,NUP153,HNRNPK,HNRNPUL1,HNRNPA1,NCBP2,SRSF2,SNRPD3,HNRNPF,FUS,CD2BP2,POLR2A,SF3A3,SNRPB,DDX23,SNRPE,SLBP,SF3B14,NUP205,U2AF1,POLR2C,GTF2H4,CPSF3,NUP62,MNAT1,TXNL4A,NUP54,NUP107,SNRNP200,PRPF6,CPSF1
BCLAF1	PID_MYC_ACTIVPATHWAY	26	79	19856	1976	3.99488e-09	1.31472e-05	MYC,CCND2,NCL,EIF4E,SMAD3,BCAT1,EIF4A1,TFRC,SUPT7L,PFKM,PDCD10,NBN,PTMA,TAF12,PMAIP1,TAF10,NME1,HMGA1,DDX18,SERPINI1,ENO1,NPM1,RUVBL1,GAPDH,HSPD1,RPL11
BCLAF1	KEGG_SPLICEOSOME	35	128	19807	1976	4.82582e-09	1.5877e-05	PCBP1,RBM17,SRSF7,DDX5,SF3B3,SNRPD1,TRA2B,NCBP1,DDX46,HNRNPU,PRPF40A,LSM5,PPIL1,ISY1,HNRNPK,SNRNP27,HNRNPA1,NCBP2,SRSF2,SNRPD3,RBM25,SF3A3,DHX8,SNRPB,HNRNPA1L2,DDX23,SNRPE,SF3B14,U2AF1,THOC1,TXNL4A,PRPF18,SNRNP200,AQR,PRPF6
BCLAF1	negative regulation of megakaryocyte differentiation (GO:0045653)	11	18	19917	1976	9.14918e-09	3.00917e-05	HIST1H4H,HIST1H4J,HIST1H4K,HIST1H4L,HIST4H4,HIST1H4I,HIST1H4E,HIST1H4A,HIST1H4C,HIST1H4B,HIST1H4D
BCLAF1	REACTOME_MRNA_SPLICING	31	111	19824	1976	1.7714e-08	5.82435e-05	HNRNPD,PCBP1,SRSF7,SF3B3,SNRPD1,NCBP1,HNRNPA2B1,PCBP2,HNRNPU,HNRNPK,HNRNPUL1,HNRNPA1,NCBP2,SRSF2,SNRPD3,HNRNPF,FUS,CD2BP2,POLR2A,SF3A3,SNRPB,DDX23,SNRPE,SF3B14,U2AF1,POLR2C,CPSF3,TXNL4A,SNRNP200,PRPF6,CPSF1
BCLAF1	REACTOME_INFLUENZA_LIFE_CYCLE	46	203	19732	1976	2.37423e-08	7.8041e-05	CLTC,GRSF1,RPL37,NUP153,RAN,KPNB1,RPL15,POLR2A,RPL37A,NUP205,POLR2C,RPS3A,NUP62,RPL29,RPL41,RPSA,RPL10,NUP54,NUP107,RPL7A,RPS27A,RPS18,RPL36A,RPL27,RPL26,RPL38,RPS15,RPS20,RPS14,RPL11,RPL5,RPLP0,RPS4X,RPS6,RPS25,RPS12,RPLP2,RPL3,RPL18,RPS2,RPS15A,RPL31,RPS7,RPL24,RPL9,RPL12
BCLAF1	REACTOME_3_UTR_MEDIATED_TRANSLATIONAL_REGULATION	41	176	19759	1976	5.24242e-08	0.000172266	EIF4E,RPL37,EIF4A1,EIF3A,EIF4A2,RPL15,RPL37A,RPS3A,RPL29,EIF3F,EIF3D,RPL41,RPSA,RPL10,RPL7A,RPS27A,RPS18,RPL36A,RPL27,RPL26,RPL38,RPS15,RPS20,RPS14,RPL11,RPL5,RPLP0,RPS4X,RPS6,RPS25,RPS12,RPLP2,RPL3,RPL18,RPS2,RPS15A,RPL31,RPS7,RPL24,RPL9,RPL12
BCLAF1	REACTOME_HIV_INFECTION	45	207	19728	1976	1.23197e-07	0.000404702	CCNT2,TAF1,TBP,CTDP1,BTRC,NCBP1,LIG4,PSMD11,NUP153,PSMD1,RAN,NCBP2,PSMC2,CDK9,KPNB1,TCEB2,TAF12,PSMF1,BANF1,POLR2A,AP1G1,TAF10,RBX1,B2M,PSMB8,PPIA,HMGA1,LIG1,NUP205,NPM1,POLR2C,GTF2H4,NUP62,MNAT1,RANBP1,AP2S1,NUP54,SLC25A6,NUP107,RPS27A,PSMD6,COBRA1,PSMB1,VPS28,PSMB10
BCLAF1	REACTOME_METABOLISM_OF_PROTEINS	88	518	19417	1976	1.65128e-07	0.000542282	EEF1A1,SAR1B,ALG10B,FUT8,UGGT1,EIF4E,C1GALT1,GRPEL2,RPL37,EDEM1,EIF4A1,AP3M1,B4GALT6,TOMM22,GALNT7,MAN1A2,PIGV,CCT6A,LONP2,MCFD2,FBXL5,EIF3A,MLEC,EIF4A2,RPL15,FBXW4,CCT4,TIMM9,TRAM1,RPL37A,SEC24C,SEC13,GMPPB,EIF5B,C18orf55,TIMM10,GFER,TUBA1B,SEC11C,RPS3A,RPL29,EIF3F,ACTB,EIF3D,RPL41,CCT7,DPAGT1,SUMF2,RPSA,RPL10,HSPD1,SLC25A6,ALG10,RPL7A,RPS27A,RPS18,PIGL,RPL36A,RPL27,RPL26,ALG3,RPL38,EIF2B4,ALG5,…
BCLAF1	RNA splicing (GO:0008380)	38	165	19770	1976	2.02859e-07	0.000665987	SYNCRIP,MBNL1,HNRNPD,PCBP1,SRSF7,KIAA1967,SF3B3,SNRPD1,NCBP1,HNRNPA2B1,PCBP2,HNRNPU,HNRNPK,HNRNPUL1,SCAF11,HNRNPA1,NCBP2,IVNS1ABP,HNRNPH3,SRSF2,SNRPD3,HNRNPF,FUS,CD2BP2,POLR2A,SF3A3,DHX8,SNRPB,DDX23,PDCD7,SNRPE,SF3B14,U2AF1,POLR2C,CPSF3,TXNL4A,SNRNP200,CPSF1
BCLAF1	REACTOME_PEPTIDE_CHAIN_ELONGATION	36	153	19782	1976	2.23494e-07	0.000733507	EEF1A1,RPL37,RPL15,RPL37A,RPS3A,RPL29,RPL41,RPSA,RPL10,RPL7A,RPS27A,RPS18,RPL36A,RPL27,RPL26,RPL38,RPS15,RPS20,RPS14,RPL11,RPL5,RPLP0,RPS4X,RPS6,RPS25,RPS12,RPLP2,RPL3,RPL18,RPS2,RPS15A,RPL31,RPS7,RPL24,RPL9,RPL12
BCLAF1	REACTOME_INFLUENZA_VIRAL_RNA_TRANSCRIPTION_AND_REPLICATION	38	169	19766	1976	3.93995e-07	0.0012927	GRSF1,RPL37,RPL15,POLR2A,RPL37A,POLR2C,RPS3A,RPL29,RPL41,RPSA,RPL10,RPL7A,RPS27A,RPS18,RPL36A,RPL27,RPL26,RPL38,RPS15,RPS20,RPS14,RPL11,RPL5,RPLP0,RPS4X,RPS6,RPS25,RPS12,RPLP2,RPL3,RPL18,RPS2,RPS15A,RPL31,RPS7,RPL24,RPL9,RPL12
BCLAF1	REACTOME_TRANSLATION	46	222	19713	1976	4.1108e-07	0.00134834	EEF1A1,EIF4E,RPL37,EIF4A1,EIF3A,EIF4A2,RPL15,TRAM1,RPL37A,EIF5B,SEC11C,RPS3A,RPL29,EIF3F,EIF3D,RPL41,RPSA,RPL10,RPL7A,RPS27A,RPS18,RPL36A,RPL27,RPL26,RPL38,EIF2B4,RPS15,RPS20,RPS14,RPL11,RPL5,RPLP0,RPS4X,RPS6,RPS25,RPS12,RPLP2,RPL3,RPL18,RPS2,RPS15A,RPL31,RPS7,RPL24,RPL9,RPL12
BCLAF1	REACTOME_NONSENSE_MEDIATED_DECAY_ENHANCED_BY_THE_EXON_JUNCTION_COMPLEX	39	176	19759	1976	4.307e-07	0.00141226	NCBP1,RPL37,NCBP2,SMG7,RPL15,UPF2,RPL37A,RPS3A,RPL29,RPL41,RPSA,RPL10,RPL7A,RPS27A,RPS18,RPL36A,RPL27,RPL26,RPL38,RPS15,RPS20,RPS14,RPL11,RPL5,RPLP0,RPS4X,RPS6,RPS25,RPS12,RPLP2,RPL3,RPL18,RPS2,RPS15A,RPL31,RPS7,RPL24,RPL9,RPL12
BCLAF1	REACTOME_APOPTOSIS_INDUCED_DNA_FRAGMENTATION	8	13	19922	1976	4.48039e-07	0.00146867	HMGB1,HMGB2,CASP3,KPNB1,HIST1H1D,HIST1H1B,HIST1H1C,HIST1H1E
BCLAF1	REACTOME_MRNA_SPLICING_MINOR_PATHWAY	16	45	19890	1976	5.88858e-07	0.00192969	SRSF7,SF3B3,SNRPD1,NCBP1,NCBP2,SRSF2,SNRPD3,POLR2A,SNRPB,DDX23,SNRPE,SF3B14,POLR2C,TXNL4A,SNRNP200,PRPF6
BCLAF1	telomere maintenance (GO:0000723)	18	59	19876	1976	2.21131e-06	0.00724424	TERF2IP,NBN,TERF2,LIG1,HIST1H4H,HIST1H4J,HIST1H4K,HIST1H4L,HIST4H4,HIST1H4I,HIST1H4E,HIST1H4A,HIST1H4C,PCNA,RTEL1,HIST1H4B,HIST1H4D,RFC2
BCLAF1	SA_FAS_SIGNALING	6	9	19926	1976	2.79804e-06	0.00916359	BCL2,CASP3,PDE6D,CFLAR,CFL1,FAS
BCLAF1	REACTOME_HIV_LIFE_CYCLE	29	125	19810	1976	3.56899e-06	0.0116849	CCNT2,TAF1,TBP,CTDP1,NCBP1,LIG4,NUP153,RAN,NCBP2,CDK9,TCEB2,TAF12,BANF1,POLR2A,TAF10,PPIA,HMGA1,LIG1,NUP205,POLR2C,GTF2H4,NUP62,MNAT1,RANBP1,NUP54,NUP107,RPS27A,COBRA1,VPS28
BCLAF1	REACTOME_SRP_DEPENDENT_COTRANSLATIONAL_PROTEIN_TARGETING_TO_MEMBRANE	37	179	19756	1976	4.7655e-06	0.0155975	RPL37,RPL15,TRAM1,RPL37A,SEC11C,RPS3A,RPL29,RPL41,RPSA,RPL10,RPL7A,RPS27A,RPS18,RPL36A,RPL27,RPL26,RPL38,RPS15,RPS20,RPS14,RPL11,RPL5,RPLP0,RPS4X,RPS6,RPS25,RPS12,RPLP2,RPL3,RPL18,RPS2,RPS15A,RPL31,RPS7,RPL24,RPL9,RPL12
BCLAF1	BIOCARTA_HIVNEF_PATHWAY	17	58	19877	1976	7.33167e-06	0.0239892	NFKB1,CASP6,MDM2,NFKBIA,BCL2,CASP3,CASP7,RASA1,MAP3K5,BIRC3,TNF,CFLAR,LMNB1,ACTG1,TRAF1,FAS,PRKDC
BCLAF1	snRNA processing (GO:0016180)	7	13	19922	1976	7.48799e-06	0.0244932	INTS6,INTS10,INTS5,INTS9,TUT1,INTS12,INTS1
BCLAF1	REACTOME_TRANSCRIPTIONAL_ACTIVITY_OF_SMAD2_SMAD3_SMAD4_HETEROTRIMER	13	38	19897	1976	8.205e-06	0.0268303	CCNT2,MYC,NCOR1,SMAD2,SMAD3,SKIL,USP9X,UBE2D3,CDK9,JUNB,TGIF1,CCNC,RPS27A
BCLAF1	ST_TUMOR_NECROSIS_FACTOR_PATHWAY	11	29	19906	1976	9.01943e-06	0.0294845	NFKB1,JUN,RALBP1,NFKBIA,CASP3,BIRC3,TNF,CFLAR,NFKBIE,NFKB2,NFKBIL1
BCLAF1	REACTOME_HOST_INTERACTIONS_OF_HIV_FACTORS	29	132	19803	1976	1.14457e-05	0.0374045	BTRC,PSMD11,NUP153,PSMD1,RAN,PSMC2,CDK9,KPNB1,TCEB2,PSMF1,BANF1,AP1G1,RBX1,B2M,PSMB8,PPIA,HMGA1,NUP205,NPM1,NUP62,RANBP1,AP2S1,NUP54,SLC25A6,NUP107,RPS27A,PSMD6,PSMB1,PSMB10
BCLAF1	PID_HIVNEFPATHWAY	12	35	19900	1976	1.55704e-05	0.0508686	NFKB1,CASP6,NFKBIA,BCL2,CASP3,CASP7,MAP3K5,BIRC3,TNF,CFLAR,TRAF1,FAS
BCLAF1	REACTOME_SLBP_DEPENDENT_PROCESSING_OF_REPLICATION_DEPENDENT_HISTONE_PRE_MRNAS	6	11	19924	1976	2.14205e-05	0.0699593	NCBP1,NCBP2,SNRPD3,SNRPB,SNRPE,SLBP
BCLAF1	REACTOME_LATE_PHASE_OF_HIV_LIFE_CYCLE	24	104	19831	1976	2.18552e-05	0.0713572	CCNT2,TAF1,TBP,CTDP1,NCBP1,NUP153,RAN,NCBP2,CDK9,TCEB2,TAF12,POLR2A,TAF10,NUP205,POLR2C,GTF2H4,NUP62,MNAT1,RANBP1,NUP54,NUP107,RPS27A,COBRA1,VPS28
BCLAF1	transcription from RNA polymerase III promoter (GO:0006383)	13	41	19894	1976	2.24718e-05	0.0733479	BRF2,ZNF143,GTF3C3,IVNS1ABP,POLR3G,SNAPC3,CRCP,TROVE2,POLR3E,POLR1C,POLR3B,SNAPC5,GTF3C5
BCLAF1	REACTOME_RNA_POL_II_TRANSCRIPTION	24	105	19830	1976	2.60174e-05	0.0848947	CCNT2,TAF1,TBP,CTDP1,SRSF7,NCBP1,NCBP2,SRSF2,SNRPD3,CDK9,TCEB2,TAF12,POLR2A,TAF10,SNRPB,SNRPE,SLBP,U2AF1,POLR2C,GTF2H4,CPSF3,MNAT1,CPSF1,COBRA1
BRF2	endothelial cell chemotaxis (GO:0035767)	1	5	19930	17	6.83446e-06	0.0227314	NR4A1
BRF2	protein targeting to lysosome (GO:0006622)	1	7	19928	17	1.4338e-05	0.0476738	SNX16
BRF2	blood vessel morphogenesis (GO:0048514)	1	8	19927	17	1.91077e-05	0.063514	ID1
FOS	interleukin-6-mediated signaling pathway (GO:0070102)	5	5	19930	5158	0	0	STAT3,IL6R,IL6ST,CTR9,FER
FOS	protein maturation by protein folding (GO:0022417)	5	5	19930	5158	0	0	FKBP1A,CALR,WFS1,FKBP1B,AIP
FOS	REACTOME_CELL_CYCLE	183	421	19514	5158	8.92607e-16	2.96702e-12	MYC,E2F1,BRCA1,E2F4,UBE2D1,LMNA,PSMD12,PPP2R1A,E2F3,DYRK1A,RBBP4,CDKN2D,NUMA1,MAPRE1,CEP57,STAG2,CKS1B,PSMD11,RRM2,SMARCA5,NSL1,MDM2,CDK6,CEP135,PPP2R2A,CDKN1A,HDAC1,GMNN,XPO1,H2AFZ,PPP2R5E,CSNK1E,CCNB1,PPP2CA,SKA2,CENPA,UBE2I,SYNE1,HIST2H2BE,BUB3,CDC6,CUL1,PSMA5,NUP43,PPP2CB,MCM6,PSMA3,PSMD7,LIN52,TERF1,CENPK,RFWD2,YWHAG,SGOL1,CEP63,HSPA2,HIST1H2BD,HIST1H2BJ,HIST1H2AE,HIST1H2AD,HIST1H2AJ,HIST1H2…
FOS	REACTOME_MEIOTIC_RECOMBINATION	51	86	19849	5158	1.30068e-11	4.32216e-08	BRCA1,H3F3B,H2AFZ,NBN,HIST2H2BE,HIST1H3B,HIST1H2BD,HIST1H2BJ,HIST1H2AE,HIST1H2AD,HIST1H2AJ,HIST1H3I,HIST1H2AB,HIST1H3H,HIST1H2BB,HIST1H2BG,HIST1H2BF,HIST1H2BO,HIST1H2BM,HIST1H2BN,HIST1H3G,HIST1H3J,HIST1H3F,HIST2H2AC,HIST1H2AC,HIST1H3C,HIST1H2BC,HIST1H2BL,HIST3H2BB,HIST1H3D,HIST1H3A,RPA2,CDK4,MRE11A,H2AFX,HIST1H4H,HIST1H4L,HIST1H4E,HIST1H4A,HIST1H4C,BRCA2,TOP3A,HIST1H4B,HIST1H2BH,HIST1H2BI,MSH5,HI…
FOS	REACTOME_MEIOSIS	63	116	19819	5158	1.80755e-11	6.00467e-08	BRCA1,LMNA,H3F3B,STAG2,H2AFZ,UBE2I,SYNE1,NBN,HIST2H2BE,TERF1,HSPA2,HIST1H3B,HIST1H2BD,HIST1H2BJ,HIST1H2AE,HIST1H2AD,HIST1H2AJ,HIST1H3I,HIST1H2AB,HIST1H3H,HIST1H2BB,HIST1H2BG,HIST1H2BF,HIST1H2BO,HIST1H2BM,HIST1H2BN,HIST1H3G,HIST1H3J,HIST1H3F,HIST2H2AC,HIST1H2AC,HIST1H3C,HIST1H2BC,HIST1H2BL,HIST3H2BB,HIST1H3D,HIST1H3A,RPA2,SUN2,CDK4,LMNB1,MRE11A,TEX12,H2AFX,HIST1H4H,HIST1H4L,HIST1H4E,HIST1H4A,HIST1…
FOS	REACTOME_RNA_POL_I_PROMOTER_OPENING	40	62	19873	5158	3.23009e-11	1.07271e-07	H3F3B,H2AFZ,MBD2,HIST2H2BE,HIST1H3B,HIST1H2BD,HIST1H2BJ,HIST1H2AE,HIST1H2AD,HIST1H2AJ,HIST1H3I,HIST1H2AB,HIST1H3H,HIST1H2BB,HIST1H2BG,HIST1H2BF,HIST1H2BO,HIST1H2BM,HIST1H2BN,HIST1H3G,HIST1H3J,HIST1H3F,HIST2H2AC,HIST1H2AC,HIST1H3C,HIST1H2BC,HIST1H2BL,HIST3H2BB,HIST1H3D,HIST1H3A,H2AFX,HIST1H4H,HIST1H4L,HIST1H4E,HIST1H4A,HIST1H4C,HIST1H4B,HIST1H2BH,HIST1H2BI,HIST1H2BK
FOS	PID_P53DOWNSTREAMPATHWAY	69	137	19798	5158	2.24471e-10	7.45245e-07	ATF3,JUN,E2F1,SP1,NFYB,NFYA,MCL1,BCL2L1,E2F3,PRMT1,DDX5,RCHY1,TADA2B,DGCR8,MET,MDM2,SNAI2,TP63,CDKN1A,BBC3,RNF144B,ZNF385A,CAV1,CCNB1,DDIT4,SERPINE1,APC,VDR,PERP,APAF1,BCL6,HIC1,CCNG1,DKK1,HTT,BNIP3L,RFWD2,TP73,CSE1L,EPHA2,PMAIP1,TP53,S100A2,CCNK,NDRG1,PRKAB1,DUSP1,SESN1,GADD45A,DUSP5,DROSHA,EDN2,SPP1,AIFM2,SFN,MSH2,FAS,BCL2A1,PCNA,TNFRSF10D,FDXR,DDB2,GDF15,BAX,GPX1,TNFRSF10A,MLH1,PMS2,CASP1
FOS	REACTOME_UNFOLDED_PROTEIN_RESPONSE	46	80	19855	5158	4.95844e-10	1.64571e-06	ATF3,NFYB,NFYA,LMNA,DNAJB11,SERP1,KHSRP,SSR1,DNAJB9,DIS3,EIF2AK3,DNAJC3,EDEM1,FKBP14,TSPYL2,CALR,ADD1,DCP2,SYVN1,HYOU1,PPP2R5B,SHC1,IL8,WFS1,ATP6V0D1,HSP90B1,HSPA5,PDIA6,XBP1,ATF6,EXOSC2,HERPUD1,TLN1,ACADVL,CCL2,TPP1,PARN,SRPR,EXOSC1,WIPI1,C19orf10,ATF4,DDIT3,EXOSC4,ARFGAP1,YIF1A
FOS	REACTOME_MEIOTIC_SYNAPSIS	42	73	19862	5158	2.40495e-09	7.97964e-06	BRCA1,LMNA,STAG2,H2AFZ,UBE2I,SYNE1,HIST2H2BE,TERF1,HSPA2,HIST1H2BD,HIST1H2BJ,HIST1H2AE,HIST1H2AD,HIST1H2AJ,HIST1H2AB,HIST1H2BB,HIST1H2BG,HIST1H2BF,HIST1H2BO,HIST1H2BM,HIST1H2BN,HIST2H2AC,HIST1H2AC,HIST1H2BC,HIST1H2BL,HIST3H2BB,SUN2,LMNB1,TEX12,H2AFX,HIST1H4H,HIST1H4L,HIST1H4E,HIST1H4A,HIST1H4C,STAG3,SYCP2,HIST1H4B,HIST1H2BH,HIST1H2BI,TINF2,HIST1H2BK
FOS	REACTOME_DEPOSITION_OF_NEW_CENPA_CONTAINING_NUCLEOSOMES_AT_THE_CENTROMERE	38	64	19871	5158	3.39571e-09	1.12636e-05	RBBP4,SMARCA5,H2AFZ,CENPA,HIST2H2BE,CENPK,HIST1H2BD,HIST1H2BJ,HIST1H2AE,HIST1H2AD,HIST1H2AJ,HIST1H2AB,HIST1H2BB,HIST1H2BG,HIST1H2BF,HIST1H2BO,HIST1H2BM,HIST1H2BN,HIST2H2AC,HIST1H2AC,HIST1H2BC,HIST1H2BL,HIST3H2BB,H2AFX,HIST1H4H,HIST1H4L,HIST1H4E,HIST1H4A,HIST1H4C,NPM1,OIP5,RUVBL1,HIST1H4B,HIST1H2BH,HIST1H2BI,HIST1H2BK,HJURP,CENPI
FOS	REACTOME_PACKAGING_OF_TELOMERE_ENDS	31	48	19887	5158	3.48401e-09	1.1553e-05	H2AFZ,HIST2H2BE,TERF1,HIST1H2BD,HIST1H2BJ,HIST1H2AE,HIST1H2AD,HIST1H2AJ,HIST1H2AB,HIST1H2BB,HIST1H2BG,HIST1H2BF,HIST1H2BO,HIST1H2BM,HIST1H2BN,HIST2H2AC,HIST1H2AC,HIST1H2BC,HIST1H2BL,HIST3H2BB,H2AFX,HIST1H4H,HIST1H4L,HIST1H4E,HIST1H4A,HIST1H4C,HIST1H4B,HIST1H2BH,HIST1H2BI,TINF2,HIST1H2BK
FOS	REACTOME_CHROMOSOME_MAINTENANCE	60	122	19813	5158	9.25752e-09	3.06887e-05	BRCA1,LMNA,RBBP4,STAG2,SMARCA5,H2AFZ,CENPA,UBE2I,SYNE1,HIST2H2BE,TERF1,CENPK,HSPA2,HIST1H2BD,HIST1H2BJ,HIST1H2AE,HIST1H2AD,HIST1H2AJ,HIST1H2AB,HIST1H2BB,HIST1H2BG,HIST1H2BF,HIST1H2BO,HIST1H2BM,HIST1H2BN,HIST2H2AC,HIST1H2AC,HIST1H2BC,HIST1H2BL,HIST3H2BB,RPA2,SUN2,LMNB1,TEX12,POLD4,H2AFX,NHP2,HIST1H4H,HIST1H4L,HIST1H4E,HIST1H4A,HIST1H4C,NPM1,OIP5,STAG3,PCNA,POLD2,RUVBL1,RUVBL2,SYCP2,HIST1H4B,HIST1H…
FOS	REACTOME_RNA_POL_I_TRANSCRIPTION	47	89	19846	5158	1.57587e-08	5.22244e-05	H3F3B,H2AFZ,MBD2,HIST2H2BE,HIST1H3B,HIST1H2BD,HIST1H2BJ,HIST1H2AE,HIST1H2AD,HIST1H2AJ,HIST1H3I,HIST1H2AB,HIST1H3H,HIST1H2BB,HIST1H2BG,HIST1H2BF,HIST1H2BO,HIST1H2BM,HIST1H2BN,HIST1H3G,HIST1H3J,HIST1H3F,HIST2H2AC,HIST1H2AC,HIST1H3C,HIST1H2BC,HIST1H2BL,HIST3H2BB,HIST1H3D,HIST1H3A,PTRF,ERCC2,GTF2H1,POLR1D,H2AFX,HIST1H4H,HIST1H4L,HIST1H4E,HIST1H4A,HIST1H4C,GTF2H4,MNAT1,HIST1H4B,HIST1H2BH,HIST1H2BI,HIS…
FOS	KEGG_P53_SIGNALING_PATHWAY	39	69	19866	5158	1.62951e-08	5.39858e-05	RCHY1,MDM4,RRM2,THBS1,MDM2,CDK6,CDKN1A,BBC3,GADD45B,CCNG2,CYCS,CASP3,PPM1D,CCNB1,SERPINE1,PERP,APAF1,CCNG1,RFWD2,TP73,SESN2,PMAIP1,TP53,CHEK1,CCND3,CDK4,SESN1,GADD45A,SESN3,SHISA5,SFN,FAS,GADD45G,DDB2,CASP8,BAX,CDK1,CCNB2,CHEK2
FOS	REACTOME_CELL_CYCLE_MITOTIC	128	325	19610	5158	2.77583e-08	9.19357e-05	MYC,E2F1,E2F4,UBE2D1,PSMD12,PPP2R1A,E2F3,DYRK1A,RBBP4,CDKN2D,NUMA1,MAPRE1,CEP57,STAG2,CKS1B,PSMD11,RRM2,NSL1,CDK6,CEP135,PPP2R2A,CDKN1A,HDAC1,GMNN,XPO1,PPP2R5E,CSNK1E,CCNB1,PPP2CA,SKA2,CENPA,BUB3,CDC6,CUL1,PSMA5,NUP43,PPP2CB,MCM6,PSMA3,PSMD7,LIN52,CENPK,YWHAG,SGOL1,CEP63,PPP2R5D,CKAP5,PPP2R5B,ORC2,TUBGCP3,ACTR1A,RBL2,CDC25A,PAFAH1B1,CDC23,WEE1,MCM3,RPA2,TUBB,PCNT,CDC7,GINS4,PSMD2,MIS12,AURKB,CCND…
FOS	REACTOME_TELOMERE_MAINTENANCE	41	75	19860	5158	2.89436e-08	9.58324e-05	H2AFZ,HIST2H2BE,TERF1,HIST1H2BD,HIST1H2BJ,HIST1H2AE,HIST1H2AD,HIST1H2AJ,HIST1H2AB,HIST1H2BB,HIST1H2BG,HIST1H2BF,HIST1H2BO,HIST1H2BM,HIST1H2BN,HIST2H2AC,HIST1H2AC,HIST1H2BC,HIST1H2BL,HIST3H2BB,RPA2,POLD4,H2AFX,NHP2,HIST1H4H,HIST1H4L,HIST1H4E,HIST1H4A,HIST1H4C,PCNA,POLD2,RUVBL1,RUVBL2,HIST1H4B,HIST1H2BH,HIST1H2BI,PRIM1,TINF2,WRAP53,HIST1H2BK,RPA3
FOS	endoplasmic reticulum unfolded protein response (GO:0030968)	40	73	19862	5158	3.76923e-08	0.000124761	ATF3,LMNA,DNAJB11,SERP1,SSR1,DNAJB9,DNAJC3,EDEM1,FKBP14,TSPYL2,CTH,CALR,ADD1,SYVN1,HYOU1,VCP,PPP2R5B,PTPN1,SHC1,IL8,DERL2,ATP6V0D1,HSP90B1,HSPA5,PDIA6,XBP1,ATF6,HERPUD1,TLN1,ACADVL,CCL2,TPP1,SRPR,WIPI1,DERL3,C19orf10,ATF4,DDIT3,ARFGAP1,YIF1A
FOS	PID_P73PATHWAY	42	79	19856	5158	6.11461e-08	0.000202333	MYC,SP1,BCL2L11,RCHY1,ITCH,MDM2,CDK6,TP63,CDKN1A,BBC3,FOXO3,PEA15,NEDD4L,CCNB1,SERPINE1,PRKACB,BUB3,FASN,DEDD,RELA,IL4R,ABL1,TP73,CLCA2,AEN,CHEK1,S100A2,YAP1,MAPK14,PIN1,SFN,TUBA1A,WWOX,KAT5,FAS,BRCA2,HAGH,NDUFS2,GDF15,BAX,CDK1,BUB1
FOS	activation of signaling protein activity involved in unfolded protein response (GO:0006987)	37	67	19868	5158	8.29132e-08	0.000274277	ATF3,LMNA,DNAJB11,SERP1,SSR1,DNAJB9,EIF2AK3,DNAJC3,EDEM1,FKBP14,TSPYL2,CALR,ADD1,SYVN1,HYOU1,PPP2R5B,SHC1,IL8,WFS1,ATP6V0D1,HSP90B1,HSPA5,PDIA6,XBP1,ATF6,HERPUD1,TLN1,ACADVL,CCL2,TPP1,SRPR,WIPI1,C19orf10,ATF4,DDIT3,ARFGAP1,YIF1A
FOS	REACTOME_RNA_POL_I_RNA_POL_III_AND_MITOCHONDRIAL_TRANSCRIPTION	57	122	19813	5158	2.02488e-07	0.000669629	POLR3A,ZNF143,H3F3B,NFIB,H2AFZ,MBD2,HIST2H2BE,HIST1H3B,HIST1H2BD,HIST1H2BJ,HIST1H2AE,HIST1H2AD,HIST1H2AJ,HIST1H3I,HIST1H2AB,HIST1H3H,HIST1H2BB,HIST1H2BG,HIST1H2BF,HIST1H2BO,HIST1H2BM,HIST1H2BN,HIST1H3G,HIST1H3J,HIST1H3F,HIST2H2AC,HIST1H2AC,HIST1H3C,HIST1H2BC,HIST1H2BL,HIST3H2BB,HIST1H3D,HIST1H3A,PTRF,ERCC2,GTF3C4,GTF2H1,POLR1D,POLR3E,H2AFX,HIST1H4H,HIST1H4L,HIST1H4E,HIST1H4A,HIST1H4C,POLRMT,GTF2H…
FOS	mitotic cell cycle (GO:0000278)	129	344	19591	5158	6.41951e-07	0.00212229	E2F1,E2F4,UBE2D1,PSMD12,PPP2R1A,E2F3,NUP98,DYRK1A,RBBP4,CDKN2D,NUMA1,MAPRE1,CEP57,STAG2,CKS1B,PSMD11,RRM2,NSL1,CDK6,CEP135,CDKN1A,HDAC1,CEP152,GMNN,XPO1,CSNK1E,CLASP2,CCNB1,SKA2,CENPA,USP3,BUB3,CDC6,CUL1,PSMA5,NUP43,MCM6,PSMA3,PSMD7,LIN52,CENPK,TOP2A,YWHAG,SGOL1,CEP63,CKAP5,ORC2,TUBGCP3,ACTR1A,RBL2,CDC25A,PAFAH1B1,CDC23,WEE1,MCM3,RPA2,UBC,TUBB,PCNT,CDC7,GINS4,PSMD2,MIS12,AURKB,CDK4,FBXO5,TUBGCP5,…
FOS	PID_NFAT_3PATHWAY	30	54	19881	5158	8.91298e-07	0.00294574	GSK3B,PPP3CA,CSNK1A1,PIM1,BCL2L1,PPP3R1,YWHAZ,FKBP1A,CHP,PRKCE,MEF2D,XPO1,CASP3,YWHAQ,MAPK9,YWHAG,KPNB1,RCAN1,MAP3K8,KPNA2,MAPK14,PRKCH,PRKACA,SFN,FKBP8,CABIN1,PRKCZ,NFATC2,BAX,NUP214
FOS	REACTOME_AMYLOIDS	41	83	19852	5158	1.20377e-06	0.00397724	H3F3B,H2AFZ,HIST2H2BE,HIST1H3B,HIST1H2BD,HIST1H2BJ,HIST1H2AE,HIST1H2AD,HIST1H2AJ,HIST1H3I,HIST1H2AB,HIST1H3H,HIST1H2BB,HIST1H2BG,HIST1H2BF,HIST1H2BO,HIST1H2BM,HIST1H2BN,HIST1H3G,HIST1H3J,HIST1H3F,HIST2H2AC,HIST1H2AC,HIST1H3C,HIST1H2BC,HIST1H2BL,HIST3H2BB,HIST1H3D,HIST1H3A,B2M,HSPG2,H2AFX,HIST1H4H,HIST1H4L,HIST1H4E,HIST1H4A,HIST1H4C,HIST1H4B,HIST1H2BH,HIST1H2BI,HIST1H2BK
FOS	PID_AP1_PATHWAY	36	70	19865	5158	1.31436e-06	0.00434132	GATA2,MYC,FOSL1,ETS1,FOSL2,ATF3,JUN,SP1,EGR1,ELF1,MAFG,BCL2L11,HIF1A,CBFB,PLAU,FOSB,ATF2,GJA1,DMTF1,CYR61,JUNB,IL8,TP53,COPS5,CCL2,DUSP1,IL6,EDN1,CSF2,TRIP6,FABP4,MMP1,TIMP1,NFATC2,CDK1,MT2A
FOS	REACTOME_GAP_JUNCTION_DEGRADATION	9	10	19925	5158	1.3361e-06	0.00441182	CLTC,GJA1,DAB2,MYO6,DNM2,AP2M1,DNM1,CLTB,CLTA
FOS	PID_PLK1_PATHWAY	26	46	19889	5158	2.4935e-06	0.00823103	PPP1CB,PRC1,PPP2R1A,STAG2,CDC14B,CCNB1,PPP2CA,RAB1A,FBXW11,SGOL1,WEE1,ROCK2,GOLGA2,FBXO5,INCENP,AURKA,KIF20A,NUDC,TPT1,CDC25C,TPX2,CDC20,CDK1,BUB1,SPC24,SSPO
FOS	REACTOME_ACTIVATION_OF_CHAPERONE_GENES_BY_XBP1S	26	46	19889	5158	2.4935e-06	0.00823103	LMNA,DNAJB11,SERP1,SSR1,DNAJB9,DNAJC3,EDEM1,FKBP14,TSPYL2,ADD1,SYVN1,HYOU1,PPP2R5B,SHC1,WFS1,ATP6V0D1,PDIA6,XBP1,TLN1,ACADVL,TPP1,SRPR,WIPI1,C19orf10,ARFGAP1,YIF1A
FOS	REACTOME_MITOTIC_M_M_G1_PHASES	71	172	19763	5158	3.36406e-06	0.011098	E2F1,PSMD12,PPP2R1A,E2F3,MAPRE1,STAG2,PSMD11,NSL1,GMNN,XPO1,PPP2R5E,PPP2CA,SKA2,CENPA,BUB3,CDC6,PSMA5,NUP43,PPP2CB,MCM6,PSMA3,PSMD7,CENPK,SGOL1,PPP2R5D,CKAP5,PPP2R5B,ORC2,PAFAH1B1,MCM3,RPA2,CDC7,PSMD2,MIS12,AURKB,FBXO5,PPP2R5A,CDCA8,INCENP,PSMD9,ORC6,MCM7,RANGAP1,PMF1,PSME4,KIF20A,PSMC6,PSMD14,NUDC,UBA52,ZWINT,MCM10,PRIM1,ORC3,KIF18A,CDC45,CENPM,APITD1,CDC20,PSMA1,PSMC5,BUB1,SPC25,SPC24,RPS27,PSM…
FOS	PID_ERBB1_DOWNSTREAM_PATHWAY	48	105	19830	5158	3.38069e-06	0.0111495	SRF,STAT3,JUN,MEF2C,EGR1,RAC1,ELK1,PPP2R1A,BCL2L1,YWHAZ,PIK3R3,VAV2,ACTR2,PPP2R2A,RPS6KA4,CHN2,ARF4,RAB5A,ATF2,WASL,PPP2CA,YWHAQ,CAPN2,RPS6KA5,NCKAP1,PLD1,MAPK9,ABI1,WASF2,YWHAG,BAIAP2,KSR1,MAP2K1,ARPC1B,ARPC5,EPS8,DUSP6,MAPK7,RALGDS,DUSP1,SLC9A1,MTOR,HRAS,SFN,PRKCZ,F2RL2,DIAPH3,RIN1
FOS	KEGG_CELL_CYCLE	56	128	19807	5158	3.5705e-06	0.0117719	MYC,E2F1,E2F4,GSK3B,YWHAZ,E2F3,SMAD2,CDKN2D,STAG2,SMAD3,CDC14B,MDM2,CDK6,CDKN1A,HDAC1,GADD45B,CCNB1,YWHAQ,BUB3,CDC6,CUL1,MCM6,YWHAG,ABL1,ORC2,RBL2,CDC25A,CDC23,WEE1,MCM3,TP53,CHEK1,CDC7,RBX1,TTK,CCND3,CDK4,GADD45A,ORC6,MAD2L2,SFN,MCM7,PCNA,GADD45G,ANAPC5,CDC25C,ORC3,CDC45,CDC20,CDK1,ANAPC10,CCNB2,BUB1,CHEK2,ANAPC13,MCM5
FOS	REACTOME_TRANSCRIPTION	83	210	19725	5158	4.81602e-06	0.0158736	TAF1,POLR3A,ZNF143,H3F3B,NCBP1,NFIB,RNMT,TCEB1,SRSF6,SRSF3,NUDT21,H2AFZ,MBD2,NCBP2,PCF11,SRSF2,HIST2H2BE,GTF2E1,SNRPD3,HIST1H3B,SRSF5,HIST1H2BD,HIST1H2BJ,HIST1H2AE,HIST1H2AD,HIST1H2AJ,HIST1H3I,HIST1H2AB,HIST1H3H,HIST1H2BB,HIST1H2BG,HIST1H2BF,HIST1H2BO,HIST1H2BM,HIST1H2BN,HIST1H3G,HIST1H3J,HIST1H3F,HIST2H2AC,HIST1H2AC,HIST1H3C,HIST1H2BC,HIST1H2BL,HIST3H2BB,HIST1H3D,HIST1H3A,SRRM1,PTRF,POLR2A,ERCC2…
FOS	REACTOME_CHOLESTEROL_BIOSYNTHESIS	16	24	19911	5158	5.04595e-06	0.0166264	HMGCR,SC5DL,FDFT1,GGPS1,HMGCS1,LBR,DHCR24,SQLE,FDPS,DHCR7,MVK,TM7SF2,IDI1,EBP,MVD,NSDHL
FOS	REACTOME_DNA_REPLICATION	77	192	19743	5158	5.2511e-06	0.0172971	E2F1,PSMD12,PPP2R1A,E2F3,MAPRE1,STAG2,PSMD11,NSL1,CDKN1A,GMNN,XPO1,PPP2R5E,PPP2CA,SKA2,CENPA,BUB3,CDC6,PSMA5,NUP43,PPP2CB,MCM6,PSMA3,PSMD7,CENPK,SGOL1,PPP2R5D,CKAP5,PPP2R5B,ORC2,PAFAH1B1,MCM3,RPA2,CDC7,GINS4,PSMD2,MIS12,AURKB,FBXO5,PPP2R5A,CDCA8,INCENP,PSMD9,ORC6,GINS2,MCM7,RANGAP1,POLD4,PMF1,PSME4,KIF20A,PSMC6,PSMD14,PCNA,POLD2,NUDC,UBA52,ZWINT,MCM10,PRIM1,ORC3,KIF18A,CDC45,CENPM,APITD1,CDC20,PS…
FOS	KEGG_LYSOSOME	53	121	19814	5158	5.88565e-06	0.0193814	CLTC,CD63,LAMP1,ATP6V0B,GNS,AP4M1,CD164,CTSS,SORT1,CTNS,AP3B1,SUMF1,NPC1,LAPTM4A,ARSB,AP3D1,CTSA,ATP6V0D1,SLC11A2,AP3M2,IDS,PSAP,TPP1,HGSNAT,AP1M1,CLTB,GM2A,GBA,GNPTG,LAPTM5,PLA2G15,ATP6AP1,SMPD1,CLTA,NAGPA,HEXA,ATP6V1H,NPC2,CTSE,CLN3,NEU1,CD68,AGA,AP4S1,GALNS,AP4B1,HEXB,GLA,TCIRG1,MCOLN1,NAGLU,DNASE2B,NAPSA
FOS	REACTOME_DIABETES_PATHWAYS	57	133	19802	5158	6.54677e-06	0.021552	ATF3,NFYB,NFYA,LMNA,PAPPA,DNAJB11,SERP1,KHSRP,SSR1,DNAJB9,DIS3,EIF2AK3,DNAJC3,EDEM1,ERO1L,FKBP14,TSPYL2,STX1A,EXOC6,CALR,SPCS2,ADD1,DCP2,IGF2BP3,SYVN1,HYOU1,PPP2R5B,SHC1,IL8,WFS1,ATP6V0D1,HSP90B1,HSPA5,KLF4,PDIA6,XBP1,ATF6,EXOSC2,HERPUD1,IGFBP4,TLN1,ACADVL,CCL2,TPP1,PARN,SRPR,EXOSC1,WIPI1,C19orf10,ATF4,EXOC4,DDIT3,MMP1,IGFBP6,EXOSC4,ARFGAP1,YIF1A
FOS	PID_P38ALPHABETADOWNSTREAMPATHWAY	22	38	19897	5158	6.74737e-06	0.0222056	MEF2A,JUN,MEF2C,CEBPB,CSNK2B,EIF4E,MITF,RPS6KA4,RAB5A,ATF2,RPS6KA5,HBP1,TP53,ATF6,MAPK14,SLC9A1,PTGS2,EIF4EBP1,DDIT3,HSPB1,KRT8,KRT19
FOS	REACTOME_PERK_REGULATED_GENE_EXPRESSION	18	29	19906	5158	8.30633e-06	0.0273278	ATF3,NFYB,NFYA,KHSRP,DIS3,EIF2AK3,DCP2,IL8,HSPA5,ATF6,EXOSC2,HERPUD1,CCL2,PARN,EXOSC1,ATF4,DDIT3,EXOSC4
FOS	REACTOME_MITOTIC_G1_G1_S_PHASES	58	137	19798	5158	8.78676e-06	0.0288997	MYC,E2F1,E2F4,PSMD12,PPP2R1A,E2F3,DYRK1A,RBBP4,CDKN2D,CKS1B,PSMD11,RRM2,CDK6,PPP2R2A,CDKN1A,HDAC1,CCNB1,PPP2CA,CDC6,CUL1,PSMA5,PPP2CB,MCM6,PSMA3,PSMD7,LIN52,ORC2,RBL2,CDC25A,WEE1,MCM3,RPA2,CDC7,PSMD2,CCND3,CDK4,FBXO5,PSMD9,ORC6,MCM7,MYBL2,PSMC6,PSMD14,PCNA,MNAT1,UBA52,MCM10,PRIM1,ORC3,CDC45,CDK1,PSMA1,PSMC5,LIN37,PSMB3,PSMD4,MCM5,RPA3
FOS	REACTOME_ACTIVATION_OF_CHAPERONE_GENES_BY_ATF6_ALPHA	9	11	19924	5158	1.12451e-05	0.0369738	NFYB,NFYA,CALR,HSP90B1,HSPA5,XBP1,ATF6,ATF4,DDIT3
FOS	regulation of gene silencing (GO:0060968)	9	11	19924	5158	1.12451e-05	0.0369738	HIST1H3B,HIST1H3I,HIST1H3H,HIST1H3G,HIST1H3J,HIST1H3F,HIST1H3C,HIST1H3D,HIST1H3A
FOS	regulation of cyclin-dependent protein kinase activity (GO:0000079)	19	32	19903	5158	1.37001e-05	0.0450184	CDKN2D,CKS1B,CDKN1A,CDC6,CCNG1,CDC25A,GTF2H1,CDK5R2,GADD45A,CKS2,GTPBP4,MNAT1,SERTAD1,CDKN3,CDC25C,CDK5RAP3,HERC5,BLM,BCCIP
FOS	REACTOME_ERK_MAPK_TARGETS	14	21	19914	5158	1.59004e-05	0.0522327	MEF2A,MEF2C,ELK1,PPP2R1A,RPS6KA2,RPS6KA1,DUSP7,PPP2CA,RPS6KA5,PPP2CB,PPP2R5D,DUSP6,MAPK14,MAPK7
FOS	KEGG_SYSTEMIC_LUPUS_ERYTHEMATOSUS	58	140	19795	5158	1.944e-05	0.063841	H3F3B,ACTN4,H2AFZ,HIST2H2BE,SNRPD3,ACTN1,HIST1H3B,HIST1H2BD,HIST1H2BJ,HIST1H2AE,HIST1H2AD,HIST1H2AJ,HIST1H3I,HIST1H2AG,HIST1H2AH,HIST1H2AB,HIST1H2AI,HIST2H2AB,HIST1H3H,HIST1H2BB,HIST1H2BG,HIST1H2BF,HIST1H2BO,HIST1H2AM,HIST1H2BM,HIST1H2AL,HIST1H2BN,HIST1H3G,HIST1H3J,HIST1H3F,HIST2H2AC,HIST1H2AC,HIST1H3C,HIST1H2BC,HIST1H2BL,HIST3H2BB,HIST1H3D,HIST1H3A,HIST3H2A,ACTN2,TROVE2,CD86,H2AFX,HIST1H4H,HIST1…
FOS	PID_PDGFRBPATHWAY	54	129	19806	5158	2.46612e-05	0.0809626	MYC,SRF,STAT3,JUN,RAC1,ELK1,PPP2R1A,YWHAZ,PIK3R3,VAV2,JAK2,YES1,RAP1B,CTTN,ACTR2,PRKCE,STAT5B,S1PR1,ACTN4,RAB5A,ITGAV,WASL,RAPGEF1,PPP2CA,YWHAQ,DOCK4,NCKAP1,FYN,MAPK9,ABI1,WASF2,PIK3CG,YWHAG,BAIAP2,ABL1,KSR1,MAP2K1,ARPC1B,ARPC5,PTPN1,EPS8,SHC1,DNM2,NCK2,SPHK1,LRP1,PIN1,NCK1,HRAS,SFN,ARAP1,LCK,BCAR1,ACTA2
FOS	REACTOME_ACTIVATION_OF_GENES_BY_ATF4	16	26	19909	5158	2.61847e-05	0.0859383	ATF3,NFYB,NFYA,KHSRP,DIS3,DCP2,IL8,ATF6,EXOSC2,HERPUD1,CCL2,PARN,EXOSC1,ATF4,DDIT3,EXOSC4
hsa-miR-1248	mesoderm formation (GO:0001707)	3	7	19928	265	1.03544e-06	0.00344387	SMAD2,BMPR2,EOMES
hsa-miR-1248	cellular protein localization (GO:0034613)	4	19	19916	265	3.99068e-06	0.013269	CNTN2,NIPBL,ANK2,CNTNAP2
hsa-miR-1248	ganglioside biosynthetic process (GO:0001574)	2	5	19930	265	2.2773e-05	0.0756973	ST8SIA4,ST8SIA2
hsa-miR-1248	negative regulation of granulocyte differentiation (GO:0030853)	2	5	19930	265	2.2773e-05	0.0756973	RUNX1,PRDM16
hsa-miR-129-3p	KEGG_AXON_GUIDANCE	13	129	19806	435	8.96597e-07	0.00298208	NFAT5,EPHB2,EFNA5,ABLIM1,PAK2,ABLIM3,DCC,NRP1,SRGAP2,PLXNC1,GNAI2,MAPK3,SEMA6B
hsa-miR-129-3p	axon guidance (GO:0007411)	18	272	19663	435	9.17741e-06	0.0305149	EPHB2,CDK5R1,PLXNA4,CNTN2,ABLIM1,PAK2,ST8SIA4,CLASP1,ABLIM3,CREB1,DCC,SCN3B,CACNA1I,SRGAP2,GPC1,KIAA1598,PLXNC1,MAPK3
hsa-miR-129-3p	REACTOME_AXON_GUIDANCE	17	251	19684	435	1.10174e-05	0.0366219	CDK5R1,CNTN2,ABLIM1,PAK2,ST8SIA4,CLASP1,ABLIM3,CREB1,DCC,NRP1,SCN3B,CACNA1I,SRGAP2,GPC1,KIAA1598,PLXNC1,MAPK3
hsa-miR-129-3p	PID_CDC42_PATHWAY	8	70	19865	435	2.06765e-05	0.0687079	TIAM1,MAP2K4,PAK2,MAP3K1,YES1,PRKCE,RPS6KB1,MAPK3
hsa-miR-129-3p	REACTOME_DEVELOPMENTAL_BIOLOGY	22	396	19539	435	2.22518e-05	0.0739206	MEF2A,CDK5R1,CNTN2,MED1,ABLIM1,PAK2,ST8SIA4,SMAD3,CLASP1,NCOA1,FURIN,ABLIM3,CREB1,DCC,NRP1,SCN3B,CACNA1I,SRGAP2,GPC1,KIAA1598,PLXNC1,MAPK3
hsa-miR-129-5p	transcription, DNA-dependent (GO:0006351)	11	52	19883	539	1.04161e-08	3.46439e-05	ESR1,MEF2A,SKI,CREBZF,THRB,NCOA1,ARNT,PAX2,NR4A2,PTMA,BPTF
hsa-miR-129-5p	REACTOME_DEVELOPMENTAL_BIOLOGY	32	396	19539	539	1.16682e-08	3.87966e-05	EP300,TCF4,MEF2A,EBF1,CDH2,TBL1X,CDK5R1,COL1A1,MAPK1,MED14,ENAH,CLTC,SIAH1,GFRA2,ACVR1C,DCX,ANK3,SEMA6A,PAX6,MEF2D,NCOA1,PAK7,PITPNA,SCN8A,TRIO,CACNB4,YWHAB,MED26,UNC5B,PLCG1,CACNB1,L1CAM
hsa-miR-129-5p	KEGG_ARRHYTHMOGENIC_RIGHT_VENTRICULAR_CARDIOMYOPATHY_ARVC	13	76	19859	539	1.39217e-08	4.62756e-05	CDH2,LMNA,DMD,CACNA1C,SGCD,CACNG2,ACTN4,CACNB4,ACTN1,CACNA2D2,RYR2,CACNB1,CTNNA2
hsa-miR-129-5p	regulation of calcium ion transport via voltage-gated calcium channel activity (GO:0051925)	7	24	19911	539	1.36161e-07	0.000452463	CACNA1C,SESTD1,CACNA1B,CACNA1A,CACNG2,CACNB4,CACNB1
hsa-miR-129-5p	calcium ion transport into cytosol (GO:0060402)	4	8	19927	539	7.42653e-07	0.00246709	CACNA1C,JPH3,JPH4,RYR2
hsa-miR-129-5p	positive regulation of transcription from RNA polymerase II promoter (GO:0045944)	27	366	19569	539	8.62755e-07	0.00286521	EP300,TCF4,MEF2A,NR2C2,ETS1,HDAC2,CNBP,WNT5A,ISL1,RBM14,MED14,SKI,SOX4,HMGB1,NFIX,MOSPD1,SOX11,NFIB,RORA,BCL11B,RUNX1,MKL2,MEF2D,NCOA1,DAB2IP,PAX2,SOX12
hsa-miR-129-5p	axon guidance (GO:0007411)	22	272	19663	539	1.52559e-06	0.00506495	GSK3B,CDK5R1,PLXNA4,COL1A1,MAPK1,ENAH,CLTC,SIAH1,CACNA1C,DCX,PTPN11,PITPNA,SCN8A,TRIO,CACNB4,YWHAB,NFASC,UNC5B,PLCG1,EPHB1,CACNB1,EPHA8
hsa-miR-129-5p	PID_FGF_PATHWAY	9	55	19880	539	1.88227e-06	0.00624724	CDH2,CTNND1,MAPK1,FRS2,PDPK1,STAT5B,SSH1,PTPN11,PLCG1
hsa-miR-129-5p	negative regulation of transcription from RNA polymerase II promoter (GO:0000122)	21	256	19679	539	1.96899e-06	0.00653311	EP300,MEF2A,TBL1X,ISL1,SKI,HMGB1,NFIX,MOSPD1,SOX11,NIPBL,NFIB,TRPS1,DAB2IP,PTCH1,MXD4,CBX7,PHF21A,CBX6,BPTF,CBX4,DNAJA3
hsa-miR-129-5p	PID_REG_GR_PATHWAY	11	82	19853	539	2.00137e-06	0.00663853	EP300,SMARCC1,HDAC2,GSK3B,CDK5R1,MAPK1,PBX1,POU2F1,STAT5B,NCOA1,ICAM1
hsa-miR-129-5p	REACTOME_AXON_GUIDANCE	20	251	19684	539	5.1139e-06	0.0169577	CDK5R1,COL1A1,MAPK1,ENAH,CLTC,SIAH1,GFRA2,DCX,ANK3,SEMA6A,PAK7,PITPNA,SCN8A,TRIO,CACNB4,YWHAB,UNC5B,PLCG1,CACNB1,L1CAM
hsa-miR-129-5p	spinal cord development (GO:0021510)	3	6	19929	539	7.59312e-06	0.0251712	SOX4,SOX11,SOX12
hsa-miR-129-5p	negative regulation of transcription, DNA-dependent (GO:0045892)	23	329	19606	539	1.16203e-05	0.0385098	CTBP2,HDAC2,ZBTB7A,RBFOX2,FOXP2,CDK5R1,WNT5A,FOXN3,NACC2,CDKN1C,NIPBL,KAT6B,CREBZF,POU2F1,USP47,SP3,ZNF281,PAX2,RCOR1,LIMS1,KCTD1,GATAD2A,CBX4
hsa-miR-129-5p	REACTOME_TRANSMISSION_ACROSS_CHEMICAL_SYNAPSES	16	186	19749	539	1.27782e-05	0.0423342	KCNJ12,GABBR2,MAPK1,GRIA4,CALM1,GNB4,CAMK2D,PDPK1,GLUL,CACNA1B,CACNA1A,CACNG2,ADCY5,CACNB4,ARHGEF9,CACNB1
hsa-miR-129-5p	PID_S1P_S1P4_PATHWAY	4	14	19921	539	2.31965e-05	0.0768269	MAPK1,GNAZ,PLCG1,GNA12
hsa-miR-129-5p	nerve growth factor receptor signaling pathway (GO:0048011)	17	217	19718	539	2.6828e-05	0.0888276	MEF2A,HDAC2,SHC3,GSK3B,MAPK1,CLTC,RICTOR,CALM1,FRS2,PDPK1,ADCY5,ITSN1,TRIO,ARHGEF9,YWHAB,IRS2,PLCG1
hsa-miR-130b	positive regulation of Notch signaling pathway (GO:0045747)	4	5	19930	883	1.68661e-07	0.000560965	STAT3,AAK1,TP63,WNT1
hsa-miR-130b	KEGG_TGF_BETA_SIGNALING_PATHWAY	16	86	19849	883	1.86756e-07	0.000620964	SP1,MAPK1,SMAD4,SMAD5,ACVR1,ACVR1C,BMPR2,INHBB,TGFBR2,TGFBR1,ZFYVE9,TGFB2,BMPR1B,SKP1,ROCK2,TNF
hsa-miR-130b	positive regulation of sequence-specific DNA binding transcription factor activity (GO:0051091)	13	66	19869	883	9.1164e-07	0.00303029	ESR1,PPARGC1A,NHLH2,JMY,KIT,NEUROD1,LRP6,WNT1,PTEN,ARID5B,PPARG,NEUROG1,TNF
hsa-miR-130b	KEGG_ENDOCYTOSIS	23	183	19752	883	1.94967e-06	0.00647876	ERBB3,ARAP2,CLTC,KIT,MET,ERBB4,VPS37B,ADRBK2,RAB5A,PIKFYVE,VPS37A,RAB5B,EPS15,NEDD4L,PDGFRA,PSD,ZFYVE20,HSPA8,LDLR,DNM2,RNF41,USP8,CHMP4B
hsa-miR-130b	peptidyl-threonine phosphorylation (GO:0018107)	6	17	19918	883	4.3005e-06	0.0142863	ACVR1,LMTK2,TGFBR2,TGFBR1,MAP3K12,LRRK2
hsa-miR-130b	platelet-derived growth factor receptor signaling pathway (GO:0048008)	4	8	19927	883	8.44349e-06	0.0280408	PTPRJ,PDGFRA,NRP1,PIK3C2A
hsa-miR-130b	REACTOME_TRANS_GOLGI_NETWORK_VESICLE_BUDDING	11	60	19875	883	1.03957e-05	0.0345139	M6PR,CLTC,OCRL,SNX2,SH3D19,PIK3C2A,TGOLN2,HSPA8,DNM2,SNX5,SNAPIN
hsa-miR-130b	PID_AP1_PATHWAY	12	70	19865	883	1.05412e-05	0.0349863	ESR1,FOSL1,SP1,MAFG,BCL2L11,MAF,MYB,CBFB,PTEN,CREB1,GJA1,EDN1
hsa-miR-130b	PID_ALK1PATHWAY	7	26	19909	883	1.09996e-05	0.0364967	MAPK1,SMAD4,SMAD5,ACVR1,BMPR2,TGFBR2,TGFBR1
hsa-miR-130b	glucose homeostasis (GO:0042593)	8	35	19900	883	1.57201e-05	0.0521436	STAT3,PRKAA1,SOX4,PRKAA2,PAX6,NEUROD1,PPARG,CYB5R4
hsa-miR-130b	REACTOME_DEVELOPMENTAL_BIOLOGY	36	396	19539	883	1.65188e-05	0.0547763	TCF4,PPARGC1A,DPYSL2,NCOA3,MAPK1,ENAH,CLTC,SMAD4,ACVR1C,TRPC3,PAX6,MET,PAK6,NEUROD1,ARHGEF12,MYO10,NCOA1,RPS6KA2,WNT1,TBL1XR1,ARHGAP35,ROBO2,HES1,CDK19,CREB1,WASL,PPARG,NRP1,SOS2,PRNP,DNM2,ROCK2,COL6A3,TNF,MED15,CCND3
hsa-miR-130b	REACTOME_GOLGI_ASSOCIATED_VESICLE_BIOGENESIS	10	53	19882	883	1.6721e-05	0.05543	CLTC,OCRL,SNX2,SH3D19,PIK3C2A,TGOLN2,HSPA8,DNM2,SNX5,SNAPIN
hsa-miR-130b	REACTOME_CIRCADIAN_CLOCK	10	53	19882	883	1.6721e-05	0.05543	PPARGC1A,BHLHE40,NCOA3,NCOA1,CLOCK,BHLHE41,TBL1XR1,CREB1,SKP1,CCRN4L
hsa-miR-130b	positive regulation of autophagy (GO:0010508)	4	9	19926	883	1.83026e-05	0.0606366	PRKAA1,PRKAA2,TP53INP1,LRRK2
hsa-miR-130b	REACTOME_BMAL1_CLOCK_NPAS2_ACTIVATES_CIRCADIAN_EXPRESSION	8	36	19899	883	2.01414e-05	0.0667084	PPARGC1A,BHLHE40,NCOA3,NCOA1,CLOCK,BHLHE41,TBL1XR1,CCRN4L
hsa-miR-130b	BIOCARTA_ALK_PATHWAY	8	37	19898	883	2.55763e-05	0.0846831	SMAD4,SMAD5,ACVR1,BMPR2,WNT1,TGFBR2,TGFBR1,TGFB2
hsa-miR-130b	regulation of cell proliferation (GO:0042127)	8	37	19898	883	2.55763e-05	0.0846831	ERBB3,RBFOX2,XIAP,KIT,BMPR2,TGFBR2,BIRC6,EGLN3
hsa-miR-130b	KEGG_PATHWAYS_IN_CANCER	31	328	19607	883	2.60682e-05	0.0862598	STAT3,MAPK1,FZD3,SLC2A1,SMAD4,XIAP,STK4,RUNX1T1,KIT,MET,CCDC6,APPL1,RALBP1,IGF1,CDKN1A,WNT1,TGFBR2,TGFA,E2F2,TGFBR1,PTEN,PPARG,PDGFRA,TGFB2,SOS2,EGLN3,WNT2B,WNT10A,MAPK10,AR,FZD6
hsa-miR-130b	REACTOME_PRE_NOTCH_TRANSCRIPTION_AND_TRANSLATION	7	29	19906	883	2.68484e-05	0.0888147	TNRC6B,MAML3,TNRC6C,EIF2C4,EIF2C1,MAML1,TNRC6A
hsa-miR-130b	regulation of small GTPase mediated signal transduction (GO:0051056)	16	123	19812	883	3.00966e-05	0.0995294	STARD13,ARAP2,VAV2,ARHGAP24,ARHGEF12,RALBP1,DLC1,ARHGAP35,RACGAP1,ARHGAP12,OCRL,ARHGAP1,ARHGEF4,SOS2,FAM13A,G3BP2
hsa-miR-155	KEGG_T_CELL_RECEPTOR_SIGNALING_PATHWAY	16	108	19827	436	1.9553e-10	6.50334e-07	FOS,NFAT5,GSK3B,PIK3R1,KRAS,PAK2,SOS1,CBL,BCL10,PDK1,RELA,CTLA4,MAP3K14,VAV3,ITK,CARD11
hsa-miR-155	PID_PI3KPLCTRKPATHWAY	9	36	19899	436	3.45459e-09	1.14865e-05	GSK3B,CCND1,PIK3R1,YWHAZ,KRAS,SOS1,YWHAE,FOXO3,CREB1
hsa-miR-155	PID_IL4_2PATHWAY	11	65	19870	436	1.45507e-08	4.83666e-05	ETS1,SP1,SPI1,CEBPB,PIK3R1,SOCS1,MYB,CBL,AICDA,INPP5D,MYBL1
hsa-miR-155	KEGG_PATHWAYS_IN_CANCER	24	328	19607	436	7.14541e-08	0.000237442	ETS1,FOS,SPI1,GSK3B,CCND1,TCF7L2,PIK3R1,SMAD2,KRAS,SOS1,CBL,TCEB1,FGF9,EPAS1,FZD5,TRAF3,TGFBR2,SUFU,E2F2,APC,FGF7,RELA,NKX3-1,CSF1R
hsa-miR-155	KEGG_B_CELL_RECEPTOR_SIGNALING_PATHWAY	11	75	19860	436	7.74639e-08	0.000257335	FOS,NFAT5,GSK3B,PIK3R1,KRAS,SOS1,BCL10,RELA,INPP5D,VAV3,CARD11
hsa-miR-155	PID_FCER1PATHWAY	10	62	19873	436	9.00243e-08	0.000298971	FOS,PIK3R1,PAK2,SOS1,CBL,S1PR1,RELA,INPP5D,ITK,LAT2
hsa-miR-155	BIOCARTA_MAPK_PATHWAY	11	87	19848	436	4.15086e-07	0.00137809	MEF2A,FOS,SP1,RPS6KA3,PAK2,MAP4K4,CREB1,MAP3K13,RELA,MAP3K14,MAP3K10
hsa-miR-155	positive regulation of transcription from RNA polymerase II promoter (GO:0045944)	24	366	19569	436	5.69764e-07	0.00189105	TCF4,MEF2A,ETS1,SP1,SPI1,RPS6KA3,STRN3,TCF7L2,SMAD2,SKI,CDC73,SOX11,RHOQ,MYB,RORA,ZBTB38,ASXL1,FZD5,SIRT1,FOXO3,ZIC3,SALL1,RELA,NKX3-1
hsa-miR-155	KEGG_NEUROTROPHIN_SIGNALING_PATHWAY	13	126	19809	436	6.9077e-07	0.00229198	GSK3B,BDNF,RPS6KA3,PIK3R1,YWHAZ,KRAS,SOS1,RAP1B,YWHAE,FOXO3,PDK1,RPS6KA6,RELA
hsa-miR-155	KEGG_COLORECTAL_CANCER	9	62	19873	436	8.79449e-07	0.00291713	FOS,GSK3B,CCND1,TCF7L2,PIK3R1,SMAD2,KRAS,TGFBR2,APC
hsa-miR-155	PID_PDGFRBPATHWAY	13	129	19806	436	9.21311e-07	0.00305507	FOS,RPS6KA3,PTPRJ,PIK3R1,YWHAZ,KRAS,SOS1,RAP1B,CBL,S1PR1,YWHAE,KSR1,SLA
hsa-miR-155	ST_PHOSPHOINOSITIDE_3_KINASE_PATHWAY	7	37	19898	436	1.08674e-06	0.00360254	GSK3B,RPS6KA3,YWHAZ,SOS1,YWHAE,PDK1,INPP5D
hsa-miR-155	PID_GMCSF_PATHWAY	7	37	19898	436	1.08674e-06	0.00360254	FOS,PIK3R1,YWHAZ,KRAS,SOS1,CSF2RB,INPP5D
hsa-miR-155	histone H3 deacetylation (GO:0070932)	3	5	19930	436	1.10916e-06	0.00367463	SMARCAD1,HDAC4,SIRT1
hsa-miR-155	PID_MET_PATHWAY	10	80	19855	436	1.30358e-06	0.00431747	ETS1,PTPRJ,PIK3R1,PAK2,SOS1,RAP1B,CBL,APC,INPP5D,RPTOR
hsa-miR-155	protein phosphorylation (GO:0006468)	22	333	19602	436	1.33883e-06	0.00443286	MYLK,GSK3B,RPS6KA3,WNK3,STK38L,PAK2,MEX3B,AAK1,SGK3,TGFBR2,MAP4K4,ABL2,WNK1,CREB1,PKN2,MAP3K13,PDK1,MARK2,RPS6KA6,CSNK1G2,MAP3K10,IKBKE
hsa-miR-155	SIG_INSULIN_RECEPTOR_PATHWAY_IN_CARDIAC_MYOCYTES	8	51	19884	436	1.42131e-06	0.00470453	GSK3B,RPS6KA3,PIK3R1,YWHAZ,SOS1,CBL,YWHAE,PDK1
hsa-miR-155	KEGG_MTOR_SIGNALING_PATHWAY	8	52	19883	436	1.68587e-06	0.00557856	CAB39,RPS6KA3,PIK3R1,RICTOR,ULK2,RHEB,RPS6KA6,RPTOR
hsa-miR-155	KEGG_ENDOMETRIAL_CANCER	8	52	19883	436	1.68587e-06	0.00557856	GSK3B,CCND1,TCF7L2,PIK3R1,KRAS,SOS1,FOXO3,APC
hsa-miR-155	SIG_PIP3_SIGNALING_IN_CARDIAC_MYOCTES	9	67	19868	436	1.84016e-06	0.00608542	GSK3B,RPS6KA3,YWHAZ,PAK2,SOS1,YWHAE,FOXO3,CREB1,PDK1
hsa-miR-155	KEGG_MAPK_SIGNALING_PATHWAY	19	267	19668	436	1.91787e-06	0.00634048	FOS,BDNF,RPS6KA3,KRAS,PAK2,SOS1,TAB2,RAP1B,CACNA1C,FGF9,TGFBR2,MAP4K4,DUSP7,FGF7,MAP3K13,RPS6KA6,RELA,MAP3K14,ARRB2
hsa-miR-155	PID_CMYB_PATHWAY	10	84	19851	436	2.1367e-06	0.00706178	ETS1,SP1,SPI1,CEBPB,CCND1,SKI,KRAS,TAB2,MYB,CSF1R
hsa-miR-155	PID_AP1_PATHWAY	9	70	19865	436	2.77657e-06	0.00917379	ETS1,FOS,SP1,CCND1,TCF7L2,MYB,CREB1,DMTF1,ACTA1
hsa-miR-155	PID_ERBB1_DOWNSTREAM_PATHWAY	11	105	19830	436	3.20412e-06	0.0105832	FOS,RPS6KA3,PIK3R1,YWHAZ,KRAS,RICTOR,SOS1,YWHAE,SMAD1,CREB1,KSR1
hsa-miR-155	histone H4 deacetylation (GO:0070933)	3	6	19929	436	3.26981e-06	0.0107969	SMARCAD1,HDAC4,RCOR1
hsa-miR-155	KEGG_PROSTATE_CANCER	10	89	19846	436	3.8092e-06	0.0125742	GSK3B,CCND1,TCF7L2,PIK3R1,KRAS,SOS1,E2F2,CREB1,RELA,NKX3-1
hsa-miR-155	positive regulation of osteoblast differentiation (GO:0045669)	5	21	19914	436	4.34264e-06	0.0143307	IL6R,ACVR2A,ACVR2B,SOX11,IL6ST
hsa-miR-155	REACTOME_SIGNALING_BY_FGFR_IN_DISEASE	12	127	19808	436	4.35186e-06	0.0143568	ZMYM2,PIK3R1,KRAS,RICTOR,CUX1,SOS1,CBL,FGF9,FOXO3,CREB1,PRKAR1A,FGF7
hsa-miR-155	REACTOME_SIGNALING_BY_FGFR_MUTANTS	7	44	19891	436	4.36304e-06	0.0143893	ZMYM2,PIK3R1,KRAS,CUX1,SOS1,FGF9,FGF7
hsa-miR-155	BIOCARTA_IL6_PATHWAY	5	22	19913	436	5.86129e-06	0.0193247	FOS,CEBPB,IL6R,SOS1,IL6ST
hsa-miR-155	PID_LKB1_PATHWAY	7	47	19888	436	7.30958e-06	0.0240924	CAB39,GSK3B,YWHAZ,YWHAE,CREB1,MARK2,RPTOR
hsa-miR-155	REACTOME_SIGNALING_BY_SCF_KIT	9	78	19857	436	7.53756e-06	0.0248363	PIK3R1,KRAS,RICTOR,SOS1,SOCS1,CBL,SOCS6,FOXO3,CREB1
hsa-miR-155	REACTOME_DEVELOPMENTAL_BIOLOGY	23	396	19539	436	7.58142e-06	0.0249732	TCF4,MEF2A,EBF1,CEBPB,RPS6KA3,SMAD2,ACVR2A,ACVR2B,KRAS,PAK2,SOS1,UNC5C,MYO10,ABL2,SDCBP,ST8SIA2,FOXO3,CREB1,RPS6KA6,RELA,SEMA5A,BOC,IAPP
hsa-miR-155	fibroblast growth factor receptor signaling pathway (GO:0008543)	11	115	19820	436	8.3166e-06	0.0273866	GSK3B,PIK3R1,KRAS,RICTOR,SOS1,CBL,FGF9,FOXO3,CREB1,PRKAR1A,FGF7
hsa-miR-155	PID_PI3KCIAKTPATHWAY	6	35	19900	436	9.03225e-06	0.0297342	GSK3B,YWHAZ,KPNA1,RICTOR,YWHAE,FOXO3
hsa-miR-155	PID_BETACATENIN_NUC_PATHWAY	9	80	19855	436	9.48668e-06	0.0312207	TCF4,CCND1,TCF7L2,YWHAZ,YWHAE,TLE4,APC,CDX1,HBP1
hsa-miR-155	TRIF-dependent toll-like receptor signaling pathway (GO:0035666)	8	64	19871	436	1.00093e-05	0.0329307	MEF2A,FOS,RPS6KA3,TAB2,CREB1,DUSP7,RELA,IKBKE
hsa-miR-155	PID_BCR_5PATHWAY	8	65	19870	436	1.1396e-05	0.0374815	ETS1,FOS,PIK3R1,SOS1,BCL10,RELA,INPP5D,CARD11
hsa-miR-155	PID_SMAD2_3NUCLEARPATHWAY	9	82	19853	436	1.18561e-05	0.0389828	FOS,SP1,KAT2A,CEBPB,SMAD2,SKI,SP3,FOXO3,CREB1
hsa-miR-155	PID_TCR_PATHWAY	8	66	19869	436	1.29433e-05	0.0425448	KRAS,SOS1,CBL,BCL10,INPP5D,MAP3K14,ITK,CARD11
hsa-miR-155	toll-like receptor 3 signaling pathway (GO:0034138)	8	66	19869	436	1.29433e-05	0.0425448	MEF2A,FOS,RPS6KA3,TAB2,CREB1,DUSP7,RELA,IKBKE
hsa-miR-155	negative regulation of transcription from RNA polymerase II promoter (GO:0000122)	17	256	19679	436	1.48526e-05	0.0487908	MEF2A,SPI1,STRN3,TCF7L2,ZMYND11,HCFC2,SKI,CDC73,SOX11,BACH1,MYB,TRPS1,ASXL1,SIRT1,SUFU,FOXO3,SALL1
hsa-miR-155	PID_KITPATHWAY	7	52	19883	436	1.58991e-05	0.0522128	GSK3B,PIK3R1,SPRED1,SOS1,SOCS1,CBL,FOXO3
hsa-miR-155	MyD88-independent toll-like receptor signaling pathway (GO:0002756)	8	68	19867	436	1.65807e-05	0.0544345	MEF2A,FOS,RPS6KA3,TAB2,CREB1,DUSP7,RELA,IKBKE
hsa-miR-155	PID_ALK1PATHWAY	5	26	19909	436	1.67926e-05	0.0551134	ACVR2A,ACVR2B,TGFBR2,SMAD1,ARRB2
hsa-miR-155	PID_MTOR_4PATHWAY	8	69	19866	436	1.87038e-05	0.0613673	YWHAZ,KRAS,RICTOR,ULK2,YWHAE,RHEB,RRAGB,RPTOR
hsa-miR-155	KEGG_RENAL_CELL_CARCINOMA	8	70	19865	436	2.10538e-05	0.0690563	ETS1,PIK3R1,KRAS,PAK2,SOS1,RAP1B,TCEB1,EPAS1
hsa-miR-155	REACTOME_TCR_SIGNALING	7	54	19881	436	2.11589e-05	0.06938	PIK3R1,PAK2,TAB2,BCL10,RELA,ITK,CARD11
hsa-miR-155	BIOCARTA_GSK3_PATHWAY	5	27	19908	436	2.11941e-05	0.0694744	GSK3B,CCND1,PIK3R1,APC,RELA
hsa-miR-155	BIOCARTA_CREB_PATHWAY	5	27	19908	436	2.11941e-05	0.0694744	PIK3R1,SOS1,CREB1,PRKAR1A,GNAS
hsa-miR-155	SIG_IL4RECEPTOR_IN_B_LYPHOCYTES	5	27	19908	436	2.11941e-05	0.0694744	GSK3B,PIK3R1,SOS1,SOCS1,PDK1
hsa-miR-155	PID_IL3_PATHWAY	5	27	19908	436	2.11941e-05	0.0694744	CEBPB,PIK3R1,YWHAZ,CSF2RB,INPP5D
hsa-miR-155	REACTOME_SIGNALING_BY_ILS	10	107	19828	436	2.27297e-05	0.0744169	IL6R,PIK3R1,YWHAZ,KRAS,SOS1,TAB2,CBL,IL6ST,CSF2RB,RELA
hsa-miR-155	BIOCARTA_HCMV_PATHWAY	4	17	19918	436	2.4356e-05	0.079717	SP1,PIK3R1,CREB1,RELA
hsa-miR-155	REACTOME_REGULATION_OF_KIT_SIGNALING	4	17	19918	436	2.4356e-05	0.079717	SOS1,SOCS1,CBL,SOCS6
hsa-miR-155	nerve growth factor receptor signaling pathway (GO:0048011)	15	217	19718	436	2.46953e-05	0.0807783	MEF2A,GSK3B,RPS6KA3,PIK3R1,KRAS,RICTOR,SOS1,YWHAE,FOXO3,CREB1,DUSP7,PRKAR1A,RELA,VAV3,NGEF
hsa-miR-155	REACTOME_SIGNALING_BY_INSULIN_RECEPTOR	10	108	19827	436	2.48178e-05	0.0811543	CAB39,PIK3R1,KRAS,SOS1,FGF9,ATP6V1C1,FGF7,RHEB,RPTOR,ATP6V1G1
hsa-miR-155	insulin receptor signaling pathway (GO:0008286)	11	130	19805	436	2.89517e-05	0.0946431	CAB39,KRAS,RHOQ,SOS1,FGF9,FOXO3,ATP6V1C1,FGF7,RHEB,RPTOR,ATP6V1G1
hsa-miR-155	KEGG_CHRONIC_MYELOID_LEUKEMIA	8	73	19862	436	2.96643e-05	0.0969428	CCND1,PIK3R1,KRAS,SOS1,CBL,TGFBR2,E2F2,RELA
hsa-miR-19a	nervous system development (GO:0007399)	31	187	19748	1155	3.24061e-08	0.000107783	MEF2C,MBNL1,HDAC4,EFNA5,ST8SIA4,ERBB4,LSAMP,CRMP1,PCDHA2,PCDHA6,PCDHA10,PCDHA8,PCDHA4,PCDHA1,PCDHAC1,PCDHA3,PCDHAC2,PCDHA5,PCDHA11,PCDHA7,DSCAM,GMFB,MYLIP,APAF1,NEUROG1,RAPGEFL1,GDA,DPYSL5,ENC1,EDNRB,CNTFR
hsa-miR-19a	KEGG_ENDOCYTOSIS	29	183	19752	1155	2.29302e-07	0.00076243	ERBB3,SMURF1,ARAP2,CLTC,KIT,ITCH,ERBB4,EPN2,SH3KBP1,VPS37B,ADRBK2,PIKFYVE,VPS37A,STAM2,RAB5B,WWP1,EPS15,ASAP2,PSD,ADRB1,EEA1,HSPA2,GIT2,LDLR,RNF41,USP8,VPS4B,CHMP4B,GRK6
hsa-miR-19a	cell adhesion (GO:0007155)	27	166	19769	1155	3.1453e-07	0.0010455	EFNB2,ARHGAP5,RHOB,CASK,ITGB8,S1PR1,RGMB,PCDHA2,PCDHA6,PCDHA10,PCDHA8,PCDHA4,PCDHA1,PCDHAC1,PCDHA3,PCDHAC2,PCDHA5,PCDHA11,PCDHA7,CD164,ITGB3,PRKX,PLXNC1,POSTN,CXCL12,ITGA11,RAB13
hsa-miR-19a	KEGG_DILATED_CARDIOMYOPATHY	18	92	19843	1155	1.08673e-06	0.0036112	DAG1,CACNA1C,ADCY7,SGCD,ITGB8,ADCY1,ITGA6,SGCB,IGF1,ADCY9,SLC8A1,ITGA2,PRKACB,ADRB1,ITGB3,PRKX,TNF,ITGA11
hsa-miR-19a	REACTOME_SIGNALING_BY_ERBB2	18	101	19834	1155	4.71471e-06	0.0156623	ERBB3,MAPK1,RAF1,KRAS,RICTOR,CALM1,EREG,YES1,ADCY7,ADCY1,ERBB4,CUL5,ADCY9,PTEN,PRKACB,RNF41,PIK3CA,USP8
hsa-miR-19a	KEGG_MELANOGENESIS	18	102	19833	1155	5.48343e-06	0.0182105	GSK3B,MAPK1,RAF1,FZD3,KRAS,CALM1,ADCY7,KIT,ADCY1,ADCY9,WNT1,PRKACB,PRKX,EDNRB,WNT10A,WNT7B,FZD6,WNT3
hsa-miR-19a	KEGG_MTOR_SIGNALING_PATHWAY	12	52	19883	1155	5.91551e-06	0.0196395	TSC1,PRKAA1,CAB39,MAPK1,PIK3R3,RICTOR,PRKAA2,ULK2,IGF1,RPS6KA2,CAB39L,PIK3CA
hsa-miR-19a	epidermal growth factor receptor signaling pathway (GO:0007173)	20	124	19811	1155	8.57875e-06	0.0284729	SHC3,GSK3B,MAPK1,RAF1,KRAS,CLTC,RICTOR,CALM1,EREG,ADCY7,ADCY1,ADCY9,ADAM12,SH3KBP1,PTEN,STAM2,EPS15,PRKACB,PIK3C2A,PIK3CA
hsa-miR-19a	NLS-bearing substrate import into nucleus (GO:0006607)	6	15	19920	1155	9.17662e-06	0.030448	KPNA6,KPNA4,DAG1,TRPS1,KPNA3,NCKIPSD
hsa-miR-19a	PID_ERBB1_INTERNALIZATION_PATHWAY	10	41	19894	1155	1.48637e-05	0.049303	PIK3R3,RAF1,KRAS,SH3KBP1,EPS15,LRIG1,ITSN1,UBE2D2,PIK3CA,USP8
hsa-miR-19a	PID_MAPKTRKPATHWAY	9	34	19901	1155	1.49633e-05	0.0496184	MEF2C,MAP3K2,MAPK1,RAF1,KRAS,RAP1B,RAP1A,MAPK14,MAP2K3
hsa-miR-19a	BIOCARTA_HER2_PATHWAY	7	22	19913	1155	1.90848e-05	0.0632661	ESR1,ERBB3,MAPK1,RAF1,ERBB4,IL6ST,PIK3CA
hsa-miR-19a	PID_BMPPATHWAY	10	42	19893	1155	1.90904e-05	0.0632661	SMURF1,GSK3B,MAPK1,SMAD4,SMAD5,XIAP,PPM1A,BMPR2,RGMB,BAMBI
hsa-miR-19a	peptidyl-serine phosphorylation (GO:0018105)	10	43	19892	1155	2.43188e-05	0.0805682	GSK3B,MAPK1,TNKS,UHMK1,HIPK2,TGFBR2,SMG1,MAP3K12,PRKX,LRRK2
hsa-miR-19b	nervous system development (GO:0007399)	31	187	19748	1155	3.24061e-08	0.000107783	MEF2C,MBNL1,HDAC4,EFNA5,ST8SIA4,ERBB4,LSAMP,CRMP1,PCDHA2,PCDHA6,PCDHA10,PCDHA8,PCDHA4,PCDHA1,PCDHAC1,PCDHA3,PCDHAC2,PCDHA5,PCDHA11,PCDHA7,DSCAM,GMFB,MYLIP,APAF1,NEUROG1,RAPGEFL1,GDA,DPYSL5,ENC1,EDNRB,CNTFR
hsa-miR-19b	KEGG_ENDOCYTOSIS	29	183	19752	1155	2.29302e-07	0.00076243	ERBB3,SMURF1,ARAP2,CLTC,KIT,ITCH,ERBB4,EPN2,SH3KBP1,VPS37B,ADRBK2,PIKFYVE,VPS37A,STAM2,RAB5B,WWP1,EPS15,ASAP2,PSD,ADRB1,EEA1,HSPA2,GIT2,LDLR,RNF41,USP8,VPS4B,CHMP4B,GRK6
hsa-miR-19b	cell adhesion (GO:0007155)	27	166	19769	1155	3.1453e-07	0.0010455	EFNB2,ARHGAP5,RHOB,CASK,ITGB8,S1PR1,RGMB,PCDHA2,PCDHA6,PCDHA10,PCDHA8,PCDHA4,PCDHA1,PCDHAC1,PCDHA3,PCDHAC2,PCDHA5,PCDHA11,PCDHA7,CD164,ITGB3,PRKX,PLXNC1,POSTN,CXCL12,ITGA11,RAB13
hsa-miR-19b	KEGG_DILATED_CARDIOMYOPATHY	18	92	19843	1155	1.08673e-06	0.0036112	DAG1,CACNA1C,ADCY7,SGCD,ITGB8,ADCY1,ITGA6,SGCB,IGF1,ADCY9,SLC8A1,ITGA2,PRKACB,ADRB1,ITGB3,PRKX,TNF,ITGA11
hsa-miR-19b	REACTOME_SIGNALING_BY_ERBB2	18	101	19834	1155	4.71471e-06	0.0156623	ERBB3,MAPK1,RAF1,KRAS,RICTOR,CALM1,EREG,YES1,ADCY7,ADCY1,ERBB4,CUL5,ADCY9,PTEN,PRKACB,RNF41,PIK3CA,USP8
hsa-miR-19b	KEGG_MELANOGENESIS	18	102	19833	1155	5.48343e-06	0.0182105	GSK3B,MAPK1,RAF1,FZD3,KRAS,CALM1,ADCY7,KIT,ADCY1,ADCY9,WNT1,PRKACB,PRKX,EDNRB,WNT10A,WNT7B,FZD6,WNT3
hsa-miR-19b	KEGG_MTOR_SIGNALING_PATHWAY	12	52	19883	1155	5.91551e-06	0.0196395	TSC1,PRKAA1,CAB39,MAPK1,PIK3R3,RICTOR,PRKAA2,ULK2,IGF1,RPS6KA2,CAB39L,PIK3CA
hsa-miR-19b	epidermal growth factor receptor signaling pathway (GO:0007173)	20	124	19811	1155	8.57875e-06	0.0284729	SHC3,GSK3B,MAPK1,RAF1,KRAS,CLTC,RICTOR,CALM1,EREG,ADCY7,ADCY1,ADCY9,ADAM12,SH3KBP1,PTEN,STAM2,EPS15,PRKACB,PIK3C2A,PIK3CA
hsa-miR-19b	NLS-bearing substrate import into nucleus (GO:0006607)	6	15	19920	1155	9.17662e-06	0.030448	KPNA6,KPNA4,DAG1,TRPS1,KPNA3,NCKIPSD
hsa-miR-19b	PID_ERBB1_INTERNALIZATION_PATHWAY	10	41	19894	1155	1.48637e-05	0.049303	PIK3R3,RAF1,KRAS,SH3KBP1,EPS15,LRIG1,ITSN1,UBE2D2,PIK3CA,USP8
hsa-miR-19b	PID_MAPKTRKPATHWAY	9	34	19901	1155	1.49633e-05	0.0496184	MEF2C,MAP3K2,MAPK1,RAF1,KRAS,RAP1B,RAP1A,MAPK14,MAP2K3
hsa-miR-19b	BIOCARTA_HER2_PATHWAY	7	22	19913	1155	1.90848e-05	0.0632661	ESR1,ERBB3,MAPK1,RAF1,ERBB4,IL6ST,PIK3CA
hsa-miR-19b	PID_BMPPATHWAY	10	42	19893	1155	1.90904e-05	0.0632661	SMURF1,GSK3B,MAPK1,SMAD4,SMAD5,XIAP,PPM1A,BMPR2,RGMB,BAMBI
hsa-miR-19b	peptidyl-serine phosphorylation (GO:0018105)	10	43	19892	1155	2.43188e-05	0.0805682	GSK3B,MAPK1,TNKS,UHMK1,HIPK2,TGFBR2,SMG1,MAP3K12,PRKX,LRRK2
hsa-miR-216b	REACTOME_DEVELOPMENTAL_BIOLOGY	22	396	19539	283	1.28667e-08	4.27945e-05	TCF4,MEF2A,EBF1,NEO1,RPS6KA3,ENAH,KRAS,UNC5D,ABLIM1,ACVR1C,SMAD3,PAX6,PLXNA1,TBL1XR1,CSNK2A1,AP2B1,TRPC5,FGFR1,GFRA1,COL4A4,YWHAB,DPYSL3
hsa-miR-216b	axon guidance (GO:0007411)	17	272	19663	283	7.38082e-08	0.000245412	NEO1,RPS6KA3,VAV2,ENAH,KRAS,UNC5D,ABLIM1,PLXNA1,PTPN11,CSNK2A1,AP2B1,TRPC5,FGFR1,GFRA1,COL4A4,YWHAB,DPYSL3
hsa-miR-216b	REACTOME_AXON_GUIDANCE	15	251	19684	283	6.55365e-07	0.00217843	NEO1,RPS6KA3,ENAH,KRAS,UNC5D,ABLIM1,PLXNA1,CSNK2A1,AP2B1,TRPC5,FGFR1,GFRA1,COL4A4,YWHAB,DPYSL3
hsa-miR-216b	transcription from RNA polymerase II promoter (GO:0006366)	15	298	19637	283	6.08853e-06	0.0202322	CCNT2,MEF2A,GABPA,NFYA,ASH1L,SRSF7,ZNF148,HLF,NFIX,FOXO4,BMPR2,PAX6,MNT,TMF1,TCEB2
hsa-miR-216b	PID_RET_PATHWAY	5	39	19896	283	1.70831e-05	0.0567501	JUN,PRKCA,PTPN11,GFRA1,PXN
hsa-miR-216b	PID_ERBB1_DOWNSTREAM_PATHWAY	8	105	19830	283	1.88535e-05	0.0626125	JUN,RPS6KA3,MAP3K2,VAV2,PRKCA,KRAS,PLD1,YWHAB
hsa-miR-216b	nodal signaling pathway (GO:0038092)	2	5	19930	283	2.7718e-05	0.0920237	ACVR1C,SMAD3
hsa-miR-301b	positive regulation of Notch signaling pathway (GO:0045747)	4	5	19930	883	1.68661e-07	0.000560965	STAT3,AAK1,TP63,WNT1
hsa-miR-301b	KEGG_TGF_BETA_SIGNALING_PATHWAY	16	86	19849	883	1.86756e-07	0.000620964	SP1,MAPK1,SMAD4,SMAD5,ACVR1,ACVR1C,BMPR2,INHBB,TGFBR2,TGFBR1,ZFYVE9,TGFB2,BMPR1B,SKP1,ROCK2,TNF
hsa-miR-301b	positive regulation of sequence-specific DNA binding transcription factor activity (GO:0051091)	13	66	19869	883	9.1164e-07	0.00303029	ESR1,PPARGC1A,NHLH2,JMY,KIT,NEUROD1,LRP6,WNT1,PTEN,ARID5B,PPARG,NEUROG1,TNF
hsa-miR-301b	KEGG_ENDOCYTOSIS	23	183	19752	883	1.94967e-06	0.00647876	ERBB3,ARAP2,CLTC,KIT,MET,ERBB4,VPS37B,ADRBK2,RAB5A,PIKFYVE,VPS37A,RAB5B,EPS15,NEDD4L,PDGFRA,PSD,ZFYVE20,HSPA8,LDLR,DNM2,RNF41,USP8,CHMP4B
hsa-miR-301b	peptidyl-threonine phosphorylation (GO:0018107)	6	17	19918	883	4.3005e-06	0.0142863	ACVR1,LMTK2,TGFBR2,TGFBR1,MAP3K12,LRRK2
hsa-miR-301b	platelet-derived growth factor receptor signaling pathway (GO:0048008)	4	8	19927	883	8.44349e-06	0.0280408	PTPRJ,PDGFRA,NRP1,PIK3C2A
hsa-miR-301b	REACTOME_TRANS_GOLGI_NETWORK_VESICLE_BUDDING	11	60	19875	883	1.03957e-05	0.0345139	M6PR,CLTC,OCRL,SNX2,SH3D19,PIK3C2A,TGOLN2,HSPA8,DNM2,SNX5,SNAPIN
hsa-miR-301b	PID_AP1_PATHWAY	12	70	19865	883	1.05412e-05	0.0349863	ESR1,FOSL1,SP1,MAFG,BCL2L11,MAF,MYB,CBFB,PTEN,CREB1,GJA1,EDN1
hsa-miR-301b	PID_ALK1PATHWAY	7	26	19909	883	1.09996e-05	0.0364967	MAPK1,SMAD4,SMAD5,ACVR1,BMPR2,TGFBR2,TGFBR1
hsa-miR-301b	glucose homeostasis (GO:0042593)	8	35	19900	883	1.57201e-05	0.0521436	STAT3,PRKAA1,SOX4,PRKAA2,PAX6,NEUROD1,PPARG,CYB5R4
hsa-miR-301b	REACTOME_DEVELOPMENTAL_BIOLOGY	36	396	19539	883	1.65188e-05	0.0547763	TCF4,PPARGC1A,DPYSL2,NCOA3,MAPK1,ENAH,CLTC,SMAD4,ACVR1C,TRPC3,PAX6,MET,PAK6,NEUROD1,ARHGEF12,MYO10,NCOA1,RPS6KA2,WNT1,TBL1XR1,ARHGAP35,ROBO2,HES1,CDK19,CREB1,WASL,PPARG,NRP1,SOS2,PRNP,DNM2,ROCK2,COL6A3,TNF,MED15,CCND3
hsa-miR-301b	REACTOME_GOLGI_ASSOCIATED_VESICLE_BIOGENESIS	10	53	19882	883	1.6721e-05	0.05543	CLTC,OCRL,SNX2,SH3D19,PIK3C2A,TGOLN2,HSPA8,DNM2,SNX5,SNAPIN
hsa-miR-301b	REACTOME_CIRCADIAN_CLOCK	10	53	19882	883	1.6721e-05	0.05543	PPARGC1A,BHLHE40,NCOA3,NCOA1,CLOCK,BHLHE41,TBL1XR1,CREB1,SKP1,CCRN4L
hsa-miR-301b	positive regulation of autophagy (GO:0010508)	4	9	19926	883	1.83026e-05	0.0606366	PRKAA1,PRKAA2,TP53INP1,LRRK2
hsa-miR-301b	REACTOME_BMAL1_CLOCK_NPAS2_ACTIVATES_CIRCADIAN_EXPRESSION	8	36	19899	883	2.01414e-05	0.0667084	PPARGC1A,BHLHE40,NCOA3,NCOA1,CLOCK,BHLHE41,TBL1XR1,CCRN4L
hsa-miR-301b	BIOCARTA_ALK_PATHWAY	8	37	19898	883	2.55763e-05	0.0846831	SMAD4,SMAD5,ACVR1,BMPR2,WNT1,TGFBR2,TGFBR1,TGFB2
hsa-miR-301b	regulation of cell proliferation (GO:0042127)	8	37	19898	883	2.55763e-05	0.0846831	ERBB3,RBFOX2,XIAP,KIT,BMPR2,TGFBR2,BIRC6,EGLN3
hsa-miR-301b	KEGG_PATHWAYS_IN_CANCER	31	328	19607	883	2.60682e-05	0.0862598	STAT3,MAPK1,FZD3,SLC2A1,SMAD4,XIAP,STK4,RUNX1T1,KIT,MET,CCDC6,APPL1,RALBP1,IGF1,CDKN1A,WNT1,TGFBR2,TGFA,E2F2,TGFBR1,PTEN,PPARG,PDGFRA,TGFB2,SOS2,EGLN3,WNT2B,WNT10A,MAPK10,AR,FZD6
hsa-miR-301b	REACTOME_PRE_NOTCH_TRANSCRIPTION_AND_TRANSLATION	7	29	19906	883	2.68484e-05	0.0888147	TNRC6B,MAML3,TNRC6C,EIF2C4,EIF2C1,MAML1,TNRC6A
hsa-miR-301b	regulation of small GTPase mediated signal transduction (GO:0051056)	16	123	19812	883	3.00966e-05	0.0995294	STARD13,ARAP2,VAV2,ARHGAP24,ARHGEF12,RALBP1,DLC1,ARHGAP35,RACGAP1,ARHGAP12,OCRL,ARHGAP1,ARHGEF4,SOS2,FAM13A,G3BP2
hsa-miR-9	REACTOME_DEVELOPMENTAL_BIOLOGY	49	396	19539	1217	8.60842e-07	0.00286316	RXRA,MEF2C,NEO1,SEMA6D,ACVR1B,PLXNA2,NCOA3,ALCAM,ENAH,SMAD4,PAK2,SOS1,ST8SIA4,PCSK6,ACVR1C,PAK6,MYO10,FOXO1,GDNF,RPS6KA2,CACNB2,RPS6KA4,FURIN,ABL2,PPARA,CAP1,HES1,FOXO3,DCC,PAK4,GFRA1,NRP1,COL5A1,CTNNA1,RPS6KA6,NR5A2,LEP,ONECUT1,KLF5,SRGAP3,MYH9,SRC,SCN2B,NCOR2,HSP90AA1,AP2M1,TLN1,COL4A2,COL9A1
hsa-miR-9	KEGG_FOCAL_ADHESION	30	201	19734	1217	1.75221e-06	0.00582609	SHC3,GSK3B,PIK3R3,PRKCA,PAK2,SOS1,RAP1B,PAK6,PDGFC,ITGA6,IGF1,PDGFRB,THBS2,FLT1,PARVA,PAK4,DIAPH1,TNC,COL5A1,VCL,SHC1,SHC2,SRC,VAV3,ACTN2,FLNB,TLN1,ITGB4,COL4A2,BRAF
hsa-miR-9	protein phosphorylation (GO:0006468)	42	333	19602	1217	2.76589e-06	0.00919383	IRF1,GSK3B,EPHB2,CSNK1A1,MAP3K2,ACVR1B,IGFBP3,DYRK1A,DYRK2,OXSR1,PRKCA,STK38L,TLK1,PAK2,MAP3K1,NEK1,ACVR1C,AAK1,SGK3,HIPK2,PRKD3,PDK3,RPS6KA4,TGFBR2,ABL2,PIM3,TGFBR1,ERG,SNRK,MAPKAPK2,RPS6KA6,FNIP2,SIK1,CSNK1G2,SIK3,SRC,STK3,TESK2,DYRK1B,CAMKK2,PDK4,BRAF
hsa-miR-9	nerve growth factor receptor signaling pathway (GO:0048011)	30	217	19718	1217	8.84582e-06	0.0293947	MEF2C,SHC3,GSK3B,BCL2L11,PRKCA,SOS1,ATF1,PCSK6,FOXO1,ADCY9,RPS6KA2,FURIN,ARHGEF2,ADCY6,FOXO3,ADCY5,ARHGEF7,MAPKAPK2,SORT1,ARHGEF17,SHC1,SHC2,PSEN1,DUSP6,SRC,VAV3,AP2M1,ARHGDIA,RALGDS,BRAF
hsa-miR-9	ST_ERK1_ERK2_MAPK_PATHWAY	9	32	19903	1217	1.29656e-05	0.0430716	CREB5,SOS1,ATF1,EIF4E,RPS6KA2,TRAF3,SHC1,DUSP6,BRAF
hsa-miR-9	PID_AR_TF_PATHWAY	12	53	19882	1217	1.30324e-05	0.0432807	RXRA,GSK3B,APPBP2,POU2F1,FOXO1,SMARCE1,SIRT1,SENP1,CARM1,SRC,HOXB13,HSP90AA1
hsa-miR-9	PID_VEGFR1_2_PATHWAY	14	69	19866	1217	1.3986e-05	0.0464336	PRKCA,SHB,PAK2,CBL,NEDD4,FLT1,MAPKAPK2,CTNNA1,VCL,SRC,HSP90AA1,CAMKK2,MAP2K3,BRAF
hsa-miR-9	pharyngeal system development (GO:0060037)	4	7	19928	1217	1.59257e-05	0.0528573	ISL1,PTCH1,HES1,TGFBR1
hsa-miR-9	protein targeting to lysosome (GO:0006622)	4	7	19928	1217	1.59257e-05	0.0528573	ZFYVE16,NEDD4,SNX16,NAGPA
hsa-miR-9	PID_CDC42_PATHWAY	14	70	19865	1217	1.68062e-05	0.0557461	GSK3B,ENAH,PAK2,MAP3K1,CBL,CDH1,MAP2K7,PAK4,ARHGEF7,CTNNA1,SRC,ARHGDIA,MAP2K3,BRAF
hsa-miR-9	PID_ERBB1_DOWNSTREAM_PATHWAY	18	105	19830	1217	1.77704e-05	0.0589266	SRF,MEF2C,MAP3K2,PIK3R3,PRKCA,MAP3K1,SOS1,ATF1,PPP2R2A,RPS6KA4,ABI1,WASF2,KSR1,DUSP6,SRC,RALGDS,SLC9A1,BRAF
hsa-miR-9	PID_MET_PATHWAY	15	80	19855	1217	2.22529e-05	0.0737682	ETS1,PAK2,MAP3K1,SOS1,EIF4E,RAP1B,GAB2,CBL,CDH1,PAK4,CTNNA1,ARF6,KPNB1,SHC1,SRC
hsa-miR-9	KEGG_PATHWAYS_IN_CANCER	39	328	19607	1217	2.37366e-05	0.0786629	ETS1,RXRA,GSK3B,JUP,PPARD,PIK3R3,PRKCA,WNT4,SMAD4,SOS1,FGF12,FGF5,RUNX1T1,CBL,CCDC6,CDH1,RUNX1,FGF9,ITGA6,FOXO1,EPAS1,IGF1,PDGFRB,FZD5,TRAF3,PTCH1,TGFBR2,TGFBR1,DCC,KITLG,TCF7,PIAS3,CTNNA1,CCNE2,EGLN3,HSP90AA1,RALGDS,COL4A2,BRAF
hsa-miR-9	KEGG_NEUROTROPHIN_SIGNALING_PATHWAY	20	126	19809	1217	2.4215e-05	0.0802242	SHC3,MAP3K3,GSK3B,PIK3R3,MAP3K1,SOS1,RAP1B,RPS6KA2,SH2B3,RPS6KA4,MAP2K7,FOXO3,MAPKAPK2,RPS6KA6,SORT1,SHC1,SHC2,PSEN1,ARHGDIA,BRAF
hsa-miR-9	axon guidance (GO:0007411)	34	272	19663	1217	2.44991e-05	0.0811409	NEO1,GSK3B,EPHB2,SEMA6D,PLXNA4,PLXNA2,ARHGAP39,ALCAM,ENAH,PAK2,SOS1,ST8SIA4,MYO10,GDNF,RPS6KA2,CACNB2,ANK2,RPS6KA4,ABL2,CAP1,DCC,CNTN4,EPHA7,GFRA1,COL5A1,RPS6KA6,NFASC,MYH9,SRC,HSP90AA1,AP2M1,TLN1,COL4A2,COL9A1
hsa-miR-92a	positive regulation of transcription from RNA polymerase II promoter (GO:0045944)	40	366	19569	886	5.53352e-08	0.000184045	USF2,GATA2,TCF4,TAF1,TFAP2A,SP1,WNT5A,STRN3,PPARGC1B,HAND1,NCOA3,NOTCH1,SKI,SOX4,NFIX,SOX11,NFIB,HMGA2,RORA,MITF,BCL11B,ITGA6,TWIST1,MKL2,MEF2D,NCOA1,TP63,RPS6KA4,DAB2IP,ZFPM2,PPP1R12A,FOXG1,RNF10,PAX3,TCF21,DCAF6,HAND2,KLF2,LMO2,EOMES
hsa-miR-92a	positive regulation of neuron apoptotic process (GO:0043525)	5	11	19924	886	2.88972e-06	0.00960833	TFAP2A,CDK5R1,NF1,TGFB2,SRPK2
hsa-miR-92a	lung alveolus development (GO:0048286)	5	12	19923	886	5.56157e-06	0.0184866	FOXP2,BMPR2,ATP7A,TCF21,PKDCC
hsa-miR-92a	REACTOME_DEVELOPMENTAL_BIOLOGY	37	396	19539	886	7.47696e-06	0.0248459	TCF4,NEO1,SEMA6D,CDK5R1,NCOA3,DCX,RANBP9,ANK3,MED29,MEF2D,NCOA1,RPS6KA4,ROBO1,ABL2,TBL1XR1,ROBO2,CREB1,SEMA3A,DCC,EGR2,ITGAV,WASL,PITPNA,TRIO,COL5A1,CACNA1I,CDC42,COL1A2,SPTBN4,MYH9,KLF4,PIP5K1C,PTF1A,CACNA1H,HNF1B,ITGA5,CCNC
hsa-miR-92a	negative regulation of transcription from RNA polymerase II promoter (GO:0000122)	27	256	19679	886	1.09848e-05	0.0364915	REST,TFAP2A,STRN3,HAND1,NOTCH1,SKI,KLF12,MTDH,NFIX,SOX11,NIPBL,NFIB,BACH1,HMGA2,TWIST1,TP63,DAB2IP,PRDM16,TBL1XR1,SMAD7,ZFHX3,GATA6,SNAI1,EDNRB,KLF4,TCF21,WWP2
hsa-miR-92a	negative regulation of transcription, DNA-dependent (GO:0045892)	32	329	19606	886	1.18603e-05	0.039388	REST,TFAP2A,RBFOX2,FOXP2,CDK5R1,WNT5A,HAND1,JARID2,ZNF148,TBX3,FOXN3,NOTCH1,NACC2,CDKN1C,ATXN1,NIPBL,HMGA2,TP63,PRDM16,ZFPM2,ZFHX3,ARID5B,FOXG1,GATA6,ATP8B1,DKK3,SUDS3,BMP7,KLF4,PTPRK,PAX9,WWP2
hsa-miR-92a	negative regulation of cell migration (GO:0030336)	9	44	19891	886	1.78935e-05	0.0594063	PTPRJ,DAG1,MIA3,SMAD7,PTEN,NF1,VCL,NF2,PTPRK
hsa-miR-92a	axon midline choice point recognition (GO:0016199)	3	5	19930	886	1.8697e-05	0.0620554	ROBO1,ROBO2,FOXG1
hsa-miR-92a	positive regulation of ossification (GO:0045778)	3	5	19930	886	1.8697e-05	0.0620554	WNT5A,SOX11,TGFB2
hsa-miR-92a	transmembrane receptor protein tyrosine phosphatase signaling pathway (GO:0007185)	3	5	19930	886	1.8697e-05	0.0620554	PTPRD,FRS2,TRIO
hsa-miR-92a	REACTOME_AXON_GUIDANCE	26	251	19684	886	2.11701e-05	0.0702001	NEO1,SEMA6D,CDK5R1,DCX,RANBP9,ANK3,RPS6KA4,ROBO1,ABL2,ROBO2,CREB1,SEMA3A,DCC,ITGAV,WASL,PITPNA,TRIO,COL5A1,CACNA1I,CDC42,COL1A2,SPTBN4,MYH9,PIP5K1C,CACNA1H,ITGA5
hsa-miR-92a	positive regulation of osteoblast differentiation (GO:0045669)	6	21	19914	886	2.24918e-05	0.0745602	SOX11,BMPR2,CTNNBIP1,FBN2,IL6ST,BMP7
hsa-miR-92a	REACTOME_ACTIVATION_OF_NMDA_RECEPTOR_UPON_GLUTAMATE_BINDING_AND_POSTSYNAPTIC_EVENTS	8	37	19898	886	2.627e-05	0.0870588	GRIA1,GRIA4,GRIA3,ADCY3,CREB1,CAMK2A,NEFL,CALM3
hsa-miR-92a	REACTOME_UNBLOCKING_OF_NMDA_RECEPTOR_GLUTAMATE_BINDING_AND_ACTIVATION	5	15	19920	886	2.685e-05	0.0889541	GRIA1,GRIA4,GRIA3,CAMK2A,NEFL
MEF2C	REACTOME_RNA_POL_I_PROMOTER_OPENING	20	62	19873	967	5.64126e-13	1.87628e-09	HIST2H2BE,HIST1H3B,HIST1H2BD,HIST1H2BJ,HIST1H2AE,HIST1H2AB,HIST1H3H,HIST1H2BB,HIST1H2BG,HIST1H2BO,HIST1H3G,HIST1H3J,HIST2H2AC,HIST1H2AC,HIST1H3C,HIST1H2BC,HIST1H4H,HIST1H4D,HIST1H2BI,HIST1H2BK
MEF2C	KEGG_SYSTEMIC_LUPUS_ERYTHEMATOSUS	29	140	19795	967	4.61765e-12	1.53537e-08	HIST2H2BE,HIST1H3B,HIST1H2BD,HIST1H2BJ,HIST1H2AE,HIST1H2AG,HIST1H2AH,HIST1H2AB,HIST1H2AI,HIST2H2AB,HIST1H3H,HIST1H2BB,HIST1H2BG,HIST1H2BO,HIST1H2AM,HIST1H2AL,HIST1H3G,HIST1H3J,HIST2H2AC,HIST1H2AC,HIST1H3C,HIST1H2BC,TROVE2,CD86,HIST1H4H,HIST1H4D,HIST1H2BI,C8G,HIST1H2BK
MEF2C	REACTOME_AMYLOIDS	22	83	19852	967	5.22334e-12	1.73624e-08	HIST2H2BE,HIST1H3B,HIST1H2BD,HIST1H2BJ,HIST1H2AE,HIST1H2AB,HIST1H3H,HIST1H2BB,HIST1H2BG,HIST1H2BO,HIST1H3G,HIST1H3J,HIST2H2AC,HIST1H2AC,HIST1H3C,HIST1H2BC,B2M,ITM2B,HIST1H4H,HIST1H4D,HIST1H2BI,HIST1H2BK
MEF2C	REACTOME_MEIOTIC_RECOMBINATION	22	86	19849	967	1.17131e-11	3.89226e-08	NBN,HIST2H2BE,HIST1H3B,HIST1H2BD,HIST1H2BJ,HIST1H2AE,HIST1H2AB,HIST1H3H,HIST1H2BB,HIST1H2BG,HIST1H2BO,HIST1H3G,HIST1H3J,HIST2H2AC,HIST1H2AC,HIST1H3C,HIST1H2BC,HIST1H4H,HIST1H4D,HIST1H2BI,MND1,HIST1H2BK
MEF2C	REACTOME_RNA_POL_I_RNA_POL_III_AND_MITOCHONDRIAL_TRANSCRIPTION	25	122	19813	967	1.39202e-10	4.62428e-07	ZNF143,CBX3,GTF3C3,HIST2H2BE,TFAM,HIST1H3B,HIST1H2BD,HIST1H2BJ,HIST1H2AE,HIST1H2AB,HIST1H3H,HIST1H2BB,HIST1H2BG,HIST1H2BO,HIST1H3G,HIST1H3J,HIST2H2AC,HIST1H2AC,HIST1H3C,HIST1H2BC,POLR3E,HIST1H4H,HIST1H4D,HIST1H2BI,HIST1H2BK
MEF2C	REACTOME_RNA_POL_I_TRANSCRIPTION	21	89	19846	967	1.75329e-10	5.82267e-07	CBX3,HIST2H2BE,HIST1H3B,HIST1H2BD,HIST1H2BJ,HIST1H2AE,HIST1H2AB,HIST1H3H,HIST1H2BB,HIST1H2BG,HIST1H2BO,HIST1H3G,HIST1H3J,HIST2H2AC,HIST1H2AC,HIST1H3C,HIST1H2BC,HIST1H4H,HIST1H4D,HIST1H2BI,HIST1H2BK
MEF2C	REACTOME_MEIOSIS	24	116	19819	967	2.43982e-10	8.1002e-07	UBE2I,NBN,HIST2H2BE,HIST1H3B,HIST1H2BD,HIST1H2BJ,HIST1H2AE,HIST1H2AB,HIST1H3H,HIST1H2BB,HIST1H2BG,HIST1H2BO,HIST1H3G,HIST1H3J,HIST2H2AC,HIST1H2AC,HIST1H3C,HIST1H2BC,LMNB1,HIST1H4H,HIST1H4D,HIST1H2BI,MND1,HIST1H2BK
MEF2C	REACTOME_PACKAGING_OF_TELOMERE_ENDS	15	48	19887	967	4.33339e-10	1.43825e-06	HIST2H2BE,HIST1H2BD,HIST1H2BJ,HIST1H2AE,HIST1H2AB,HIST1H2BB,HIST1H2BG,HIST1H2BO,HIST2H2AC,HIST1H2AC,HIST1H2BC,HIST1H4H,HIST1H4D,HIST1H2BI,HIST1H2BK
MEF2C	REACTOME_TRANSCRIPTION	33	210	19725	967	5.8771e-10	1.95002e-06	CCNT2,ZNF143,CBX3,SRSF7,GTF3C3,SRSF2,HIST2H2BE,TFAM,CDK9,HIST1H3B,HIST1H2BD,HIST1H2BJ,HIST1H2AE,HIST1H2AB,HIST1H3H,HIST1H2BB,HIST1H2BG,HIST1H2BO,HIST1H3G,HIST1H3J,HIST2H2AC,HIST1H2AC,HIST1H3C,HIST1H2BC,POLR2A,NFX1,POLR3E,HIST1H4H,U2AF1,HIST1H4D,HIST1H2BI,GTF2A1,HIST1H2BK
MEF2C	REACTOME_DEPOSITION_OF_NEW_CENPA_CONTAINING_NUCLEOSOMES_AT_THE_CENTROMERE	17	64	19871	967	8.21285e-10	2.7242e-06	HIST2H2BE,RSF1,HIST1H2BD,HIST1H2BJ,HIST1H2AE,HIST1H2AB,HIST1H2BB,HIST1H2BG,HIST1H2BO,HIST2H2AC,HIST1H2AC,HIST1H2BC,HIST1H4H,HIST1H4D,HIST1H2BI,MLF1IP,HIST1H2BK
MEF2C	REACTOME_MEIOTIC_SYNAPSIS	17	73	19862	967	8.29207e-09	2.74965e-05	UBE2I,HIST2H2BE,HIST1H2BD,HIST1H2BJ,HIST1H2AE,HIST1H2AB,HIST1H2BB,HIST1H2BG,HIST1H2BO,HIST2H2AC,HIST1H2AC,HIST1H2BC,LMNB1,HIST1H4H,HIST1H4D,HIST1H2BI,HIST1H2BK
MEF2C	REACTOME_TELOMERE_MAINTENANCE	15	75	19860	967	4.7857e-07	0.00158646	HIST2H2BE,HIST1H2BD,HIST1H2BJ,HIST1H2AE,HIST1H2AB,HIST1H2BB,HIST1H2BG,HIST1H2BO,HIST2H2AC,HIST1H2AC,HIST1H2BC,HIST1H4H,HIST1H4D,HIST1H2BI,HIST1H2BK
MEF2C	REACTOME_APOPTOSIS_INDUCED_DNA_FRAGMENTATION	6	13	19922	967	8.20661e-07	0.00271967	HMGB2,CASP3,HIST1H1D,HIST1H1B,HIST1H1C,HIST1H1E
MEF2C	REACTOME_CHROMOSOME_MAINTENANCE	19	122	19813	967	1.64101e-06	0.00543668	UBE2I,HIST2H2BE,RSF1,HIST1H2BD,HIST1H2BJ,HIST1H2AE,HIST1H2AB,HIST1H2BB,HIST1H2BG,HIST1H2BO,HIST2H2AC,HIST1H2AC,HIST1H2BC,LMNB1,HIST1H4H,HIST1H4D,HIST1H2BI,MLF1IP,HIST1H2BK
MEF2C	REACTOME_IMMUNE_SYSTEM	77	933	19002	967	1.816e-06	0.00601461	MEF2A,IRF4,STAT1,JUN,EGR1,IL6R,PIK3R1,MAPK1,BTRC,CLTC,RICTOR,CALM1,TRIP12,SOCS1,INPPL1,PJA2,CAMK2D,MDM2,NFKBIA,CDKN1A,CSK,PTEN,CD36,CTSC,PTPRC,IL6ST,LYN,UBE2D3,IRF2,TICAM2,TNFAIP3,EIF4A2,NR4A1,CALM2,UBE2J1,RNF4,CTSA,MAP3K8,BIRC3,HSP90B1,ICAM1,B2M,TAP1,KEAP1,NFKB2,PPP2R5A,HSP90AB1,KIF5B,CIITA,CD86,LNPEP,IL2RB,ITGAL,PTPN6,CNPY3,NOD2,TLR5,ASB2,LY86,PSMB9,LRSAM1,CD200R1,CD74,NUP54,NUP88,CCR6,ZBP1,C8G…
MEF2C	REACTOME_DOWNREGULATION_OF_SMAD2_3_SMAD4_TRANSCRIPTIONAL_ACTIVITY	7	20	19915	967	2.22627e-06	0.00737117	SMAD2,SMAD3,SKIL,USP9X,TRIM33,PARP1,UBE2D3
MEF2C	DNA-dependent DNA replication (GO:0006261)	6	15	19920	967	2.82459e-06	0.00934938	MCMBP,REV3L,TFAM,POLG,RPAIN,POLG2
MEF2C	BIOCARTA_HIVNEF_PATHWAY	12	58	19877	967	3.13656e-06	0.0103789	NFKB1,CASP6,MDM2,NFKBIA,CASP3,PARP1,RASA1,BIRC3,CFLAR,LMNB1,ACTG1,TRAF1
MEF2C	negative regulation of DNA damage response, signal transduction by p53 class mediator (GO:0043518)	5	11	19924	967	4.80377e-06	0.0158909	DYRK1A,MDM2,SIRT1,KDM1A,CD74
MEF2C	regulation of gene silencing (GO:0060968)	5	11	19924	967	4.80377e-06	0.0158909	HIST1H3B,HIST1H3H,HIST1H3G,HIST1H3J,HIST1H3C
MEF2C	ST_TUMOR_NECROSIS_FACTOR_PATHWAY	8	29	19906	967	5.95535e-06	0.0196884	NFKB1,JUN,NFKBIA,CASP3,TNFAIP3,BIRC3,CFLAR,NFKB2
MEF2C	REACTOME_SIGNALING_BY_TGF_BETA_RECEPTOR_COMPLEX	12	63	19872	967	8.30921e-06	0.0274619	CCNT2,SMAD2,SMAD3,SKIL,RHOA,USP9X,TRIM33,PARP1,UBE2D3,CDK9,UCHL5,PPP1R15A
MEF2C	REACTOME_TRANSCRIPTIONAL_ACTIVITY_OF_SMAD2_SMAD3_SMAD4_HETEROTRIMER	9	38	19897	967	9.40152e-06	0.0310626	CCNT2,SMAD2,SMAD3,SKIL,USP9X,TRIM33,PARP1,UBE2D3,CDK9
MEF2C	ST_B_CELL_ANTIGEN_RECEPTOR	9	40	19895	967	1.54328e-05	0.0509745	NFKB1,NFAT5,EPHB2,PIK3R1,MAPK1,NFKBIA,CSK,LYN,NFKB2
MEF2C	BIOCARTA_RACCYCD_PATHWAY	7	26	19909	967	2.12843e-05	0.0702806	NFKB1,PIK3R1,MAPK1,CDK6,NFKBIA,CDKN1A,RHOA
MEF2C	PID_MYC_ACTIVPATHWAY	13	79	19856	967	2.375e-05	0.0783987	MTDH,SMAD3,ODC1,RCC1,NBN,PTMA,PMAIP1,HSP90AA1,NME1,HMGA1,GAPDH,HSPD1,RPL11
MEF2C	glucocorticoid receptor signaling pathway (GO:0042921)	3	5	19930	967	2.6456e-05	0.0873047	NR3C1,ARID1A,YWHAH
MEF2C	BIOCARTA_ATM_PATHWAY	6	20	19915	967	2.7476e-05	0.0906432	NFKB1,JUN,MDM2,NFKBIA,CDKN1A,NBN
RXRA	cellular copper ion homeostasis (GO:0006878)	5	5	19930	4985	0	0	ARF1,ATP7B,APP,ATP7A,MT2A
RXRA	regulation of phosphoprotein phosphatase activity (GO:0043666)	5	5	19930	4985	0	0	TSC1,PPP6R3,PPP2R4,PPP6R1,HSP90B1
RXRA	gene expression (GO:0010467)	295	716	19219	4985	1.28928e-22	4.28557e-19	CCNT2,NR3C1,NR2C2,TBP,POLR3A,ZNF143,RARA,TNRC6B,PSME3,PTBP1,HNRNPA3,CTDP1,SSR3,PPP2R1A,HNRNPD,PCBP1,MED1,YWHAZ,EEF1A1,SUPT16H,RBPJ,EIF4B,SRSF7,CNOT6L,CNOT8,MED14,SF3B3,TAF4,MED13,NOTCH1,NCBP1,DICER1,TAF5,EIF4E,HNRNPA2B1,CPSF7,RNMT,PCBP2,HNRNPU,TCEB1,SRSF1,POU2F1,SPCS3,SRSF3,AIMP1,NUDT21,RPL37,NR4A3,GTF3C3,CNOT2,EIF4A1,HNRNPK,XPO1,SMG6,HNRNPUL1,PSMD3,RXRB,SF3B1,PSMD1,PPARA,TCEA1,ZFP36L1,HNRNPA1,HN…
RXRA	REACTOME_TRANSCRIPTION	112	210	19725	4985	3.01633e-19	1.00233e-15	CCNT2,RDBP,TBP,POLR3A,ZNF143,CBX3,H3F3B,CTDP1,SUPT16H,SRSF7,TAF4,NCBP1,TAF5,CPSF7,RNMT,TCEB1,SRSF1,POU2F1,SRSF3,NUDT21,GTF3C3,H2AFZ,TCEA1,MBD2,RNPS1,NCBP2,POLR2H,PCF11,SRSF2,HIST2H2BE,TFAM,SNRPD3,THOC4,WHSC2,CDK9,POLR2B,HIST1H3B,SRSF5,HIST1H2BD,HIST1H2BJ,HIST1H2AE,HIST1H2AD,HIST1H3I,HIST1H2AB,HIST1H3H,HIST1H2BG,HIST1H2BF,HIST1H2BO,HIST1H3G,HIST1H3J,HIST1H3F,HIST2H2AC,HIST1H2AC,HIST1H2BC,HIST1H3D,…
RXRA	REACTOME_MRNA_SPLICING	68	111	19824	4985	1.20042e-16	3.9878e-13	PTBP1,HNRNPA3,HNRNPD,PCBP1,SRSF7,SF3B3,NCBP1,HNRNPA2B1,CPSF7,PCBP2,HNRNPU,SRSF1,SRSF3,NUDT21,HNRNPK,HNRNPUL1,SF3B1,HNRNPA1,HNRNPA0,CCAR1,RNPS1,NCBP2,POLR2H,PCF11,SRSF2,HNRNPR,SMC1A,SNRPB2,SNRPD3,HNRNPF,THOC4,PRPF8,POLR2B,DHX9,SRSF5,FUS,SRRM1,CD2BP2,POLR2A,U2AF2,HNRNPH2,SNRPG,SF3A3,DHX38,SNRPB,CSTF1,SF3B2,DDX23,SNRPE,SF3B14,NFX1,SRSF4,CLP1,EFTUD2,U2AF1,SNRPA,POLR2C,CPSF3,PRPF4,PHF5A,NHP2L1,SF3A2,S…
RXRA	REACTOME_PROCESSING_OF_CAPPED_INTRON_CONTAINING_PRE_MRNA	80	140	19795	4985	1.22312e-16	4.06197e-13	PTBP1,HNRNPA3,HNRNPD,PCBP1,SRSF7,SF3B3,NCBP1,EIF4E,HNRNPA2B1,CPSF7,PCBP2,HNRNPU,SRSF1,SRSF3,NUDT21,NUP153,HNRNPK,HNRNPUL1,SF3B1,HNRNPA1,HNRNPA0,NUP188,CCAR1,RNPS1,NCBP2,POLR2H,PCF11,SRSF2,HNRNPR,TPR,SMC1A,SNRPB2,SNRPD3,HNRNPF,THOC4,PRPF8,POLR2B,DHX9,SRSF5,FUS,SRRM1,CD2BP2,POLR2A,U2AF2,HNRNPH2,SNRPG,SF3A3,DHX38,SNRPB,CSTF1,SF3B2,DDX23,NUP210,SNRPE,SLBP,SF3B14,NFX1,NXF1,SRSF4,NUP205,CLP1,EFTUD2,U2A…
RXRA	REACTOME_MRNA_PROCESSING	87	161	19774	4985	7.43769e-16	2.46931e-12	PTBP1,HNRNPA3,HNRNPD,PCBP1,SRSF7,SF3B3,NCBP1,EIF4E,HNRNPA2B1,CPSF7,RNMT,PCBP2,HNRNPU,SRSF1,SRSF3,NUDT21,NUP153,HNRNPK,HNRNPUL1,SF3B1,HNRNPA1,HNRNPA0,NUP188,CCAR1,RNPS1,NCBP2,POLR2H,PCF11,SRSF2,HNRNPR,TPR,SMC1A,SNRPB2,SNRPD3,HNRNPF,THOC4,PRPF8,POLR2B,DHX9,SRSF5,FUS,SRRM1,CD2BP2,POLR2A,U2AF2,HNRNPH2,ADAR,SNRPG,SF3A3,DHX38,SNRPB,LSM11,CSTF1,SF3B2,DDX23,NUP210,SNRPE,SLBP,SF3B14,NFX1,NXF1,SRSF4,NUP205…
RXRA	KEGG_RIBOSOME	55	88	19847	4985	2.04306e-14	6.78093e-11	RPS27L,RPL37,RPS16,RPS23,RPL14,RPL15,RPL13A,RPL27A,RPL34,RPL4,RPS3A,RPL29,RPL41,RPS29,RPSA,RPL10,RPL23,RPS27A,RPS3,RPS19,RPL7,RPS8,RPL39,RPL36A,RPL27,RPL26,RPL10A,RPL38,RPL18A,RPL36,RPL32,RPS26,RPS15,RPS20,RPL11,RPLP0,RPS11,RPLP1,RPS6,RPS25,RPS13,RPL13,RPS12,RPLP2,RPL3,RPL35A,RPL18,RPS2,RPS15A,RPS7,RPL35,RPL36AL,RPL9,RPL12,RPL21
RXRA	REACTOME_CELL_CYCLE	173	421	19514	4985	8.92168e-14	2.96021e-10	MYC,SMC3,E2F1,MAX,BRCA1,UBE2D1,PPP2R1A,E2F3,RBBP4,CDKN2D,CEP57,BTRC,STAG2,LIN54,CKS1B,CLASP1,RRM2,STAG1,NSL1,AHCTF1,MDM2,CDK6,ATM,CEP135,SYNE2,CDKN1A,GMNN,XPO1,PSMD3,DBF4,ORC4,PSMD1,H2AFZ,NINL,TERF2IP,PCM1,CSNK1D,ANAPC1,CENPA,UBE2I,ANAPC11,CDC27,HIST2H2BE,CENPJ,SMC1A,BUB3,PLK4,ZWILCH,CUL1,CENPP,MCM6,PSMD7,DSN1,RFWD2,YWHAG,CENPL,RSF1,PPP2R5C,HIST1H2BD,HIST1H2BJ,HIST1H2AE,HIST1H2AD,HIST1H2AB,HIST1H…
RXRA	nuclear mRNA splicing, via spliceosome (GO:0000398)	89	177	19758	4985	1.10382e-13	3.66138e-10	ZCCHC8,PTBP1,SYNCRIP,HNRNPA3,HNRNPD,SRRM2,PCBP1,SRSF7,RBM22,DDX5,SF3B3,RALY,TRA2B,NCBP1,HNRNPA2B1,CPSF7,PCBP2,HNRNPU,SRSF1,SRSF3,NUDT21,SRSF10,ISY1,HNRNPK,DHX35,HNRNPUL1,SF3B1,SF1,HNRNPA1,HNRNPA0,CCAR1,RNPS1,NCBP2,PNN,POLR2H,PCF11,SRSF2,HNRNPR,SMC1A,SNRPB2,SNRPD3,HNRNPF,PRPF8,POLR2B,DHX9,PABPC1,SRSF5,FUS,SRRM1,CD2BP2,POLR2A,U2AF2,HNRNPH2,SNRPG,SF3A3,DHX8,DGCR14,DHX38,SNRPB,CSTF1,SF3B2,DDX23,SART1…
RXRA	translational initiation (GO:0006413)	73	139	19796	4985	8.63237e-13	2.86249e-09	EIF4B,EIF4G2,EIF4E,RPL37,EIF4A1,EIF2S2,RPS16,EIF2A,RPS23,EIF2D,PABPC1,RPL14,EIF3A,EIF4A2,EIF2S1,EIF2S3,RPL15,EIF2B1,RPL13A,COPS5,RPL27A,EIF2B5,RPL34,RPL4,RPS3A,RPL29,EIF3F,EIF3D,RPL41,RPS29,RPSA,RPL10,RPL23,RPS27A,RPS19,RPL7,RPS8,RPL39,EIF2B2,RPL36A,RPL27,RPL26,RPL10A,RPL38,EIF2B4,RPL18A,RPL36,RPL32,RPS26,RPS15,RPS20,RPS14,RPL11,RPLP0,RPS11,RPLP1,RPS6,RPS25,RPS13,RPL13,RPS12,RPLP2,RPL3,RPL35A,RPL…
RXRA	translational elongation (GO:0006414)	59	105	19830	4985	2.24017e-12	7.42616e-09	EEF1A1,EEF2K,RPL37,RPS16,RPS23,RPL14,RPL15,RPL13A,RPL27A,RPL34,TSFM,EEF2,RPL4,RPS3A,RPL29,TUFM,RPL41,RPS29,RPSA,RPL10,RPL23,RPS27A,RPS3,RPS19,RPL7,RPS8,RPL39,RPL36A,RPL27,RPL26,RPL10A,RPL38,RPL18A,RPL36,RPL32,RPS26,RPS15,RPS20,RPS14,RPL11,RPLP0,RPS11,RPLP1,RPS6,RPS25,RPS13,RPL13,RPS12,RPLP2,RPL3,RPL35A,RPL18,RPS2,RPS15A,RPS7,RPL35,RPL9,RPL12,RPL21
RXRA	REACTOME_CHROMOSOME_MAINTENANCE	65	122	19813	4985	5.57662e-12	1.84809e-08	SMC3,BRCA1,RBBP4,STAG2,STAG1,SYNE2,H2AFZ,TERF2IP,CENPA,UBE2I,HIST2H2BE,SMC1A,CENPP,RSF1,HIST1H2BD,HIST1H2BJ,HIST1H2AE,HIST1H2AD,HIST1H2AB,HIST1H2BG,HIST1H2BF,HIST1H2BO,HIST2H2AC,HIST1H2AC,HIST1H2BC,CENPO,POT1,FKBP6,SUN2,DNA2,TERF2,LMNB1,POLD3,POLA1,CASC5,RBBP7,FEN1,H2AFX,HIST1H4H,HIST1H4J,HIST1H4L,HIST4H4,HIST1H4I,HIST1H4C,NPM1,OIP5,PCNA,CENPN,HIST1H4B,HIST1H4D,HIST1H2BH,HIST1H2BI,PRIM1,MLF1IP,TI…
RXRA	viral infectious cycle (GO:0019058)	59	107	19828	4985	6.73375e-12	2.23089e-08	KPNA1,RPL37,XPO1,RPS16,RPS23,RPL14,KPNB1,RPL15,RPL13A,RPL27A,RPL34,RPL4,RPS3A,RPL29,RPL41,RPS29,RPSA,TGFB1,RPL10,SLC25A6,RPL23,RPS27A,RPS3,RPS19,RPL7,RPS8,RPL39,RPL36A,RPL27,RPL26,RPL10A,RPL38,RPL18A,RPL36,RPL32,RPS26,RPS15,RPS20,RPS14,RPL11,RPLP0,RPS11,RPLP1,RPS6,RPS25,RPS13,RPL13,RPS12,RPLP2,RPL3,RPL35A,RPL18,RPS2,RPS15A,RPS7,RPL35,RPL9,RPL12,RPL21
RXRA	viral reproduction (GO:0016032)	136	328	19607	4985	1.57239e-11	5.20777e-08	CCNT2,TBP,PSME3,ARF1,PSIP1,CTDP1,SUPT16H,KPNA1,TAF4,BTRC,NCBP1,TAF5,LIG4,RNMT,TCEB1,RPL37,RCC1,NUP153,XPO1,PSMD3,PSMD1,TCEA1,NUP188,NCBP2,POLR2H,RPS16,NMT1,TPR,RPS23,CDK9,POLR2B,PSMD7,SLC25A4,RPL14,KPNB1,SKP1,PSMF1,BANF1,RPL15,POLR2A,VPS37D,GTF2E2,AP1G1,TSG101,UBC,VPS37C,TAF10,RBX1,B2M,RPL13A,PPIA,NUP160,AP2M1,RPL27A,NUP210,HMGA1,AP1B1,TAF6,PSMD9,XRCC6,RPL34,NUP205,AP2A1,SUPT5H,LCK,XRCC5,POLR2C,R…
RXRA	nuclear-transcribed mRNA catabolic process, nonsense-mediated decay (GO:0000184)	66	128	19807	4985	2.78983e-11	9.23713e-08	PPP2R1A,NCBP1,RPL37,SMG6,RNPS1,NCBP2,RPS16,DCP2,GSPT1,RPS23,PABPC1,RPL14,SMG7,RPL15,RPL13A,UPF2,RPL27A,PNRC2,SMG5,RPL34,RPL4,RPS3A,RPL29,RPL41,RPS29,RPSA,RPL10,RPL23,RPS27A,RPS3,RPS19,RPL7,RPS8,RPL39,RPL36A,RPL27,RPL26,RPL10A,RPL38,RPL18A,RPL36,RPL32,RPS26,RPS15,RPS20,RPS14,RPL11,RPLP0,RPS11,RPLP1,RPS6,RPS25,RPS13,RPL13,RPS12,RPLP2,RPL3,RPL35A,RPL18,RPS2,RPS15A,RPS7,RPL35,RPL9,RPL12,RPL21
RXRA	REACTOME_RNA_POL_II_TRANSCRIPTION	57	105	19830	4985	3.44385e-11	1.13991e-07	CCNT2,RDBP,TBP,CTDP1,SUPT16H,SRSF7,TAF4,NCBP1,TAF5,CPSF7,RNMT,TCEB1,SRSF1,SRSF3,NUDT21,TCEA1,RNPS1,NCBP2,POLR2H,PCF11,SRSF2,SNRPD3,THOC4,WHSC2,CDK9,POLR2B,SRSF5,SRRM1,POLR2A,GTF2E2,U2AF2,SNRPG,TAF10,DHX38,SNRPB,LSM11,CSTF1,SNRPE,SLBP,TAF6,NFX1,SRSF4,SUPT5H,CLP1,U2AF1,POLR2C,TAF9,SUPT4H1,GTF2H4,CPSF3,CCNH,GTF2A1,POLR2L,CPSF1,COBRA1,CCNT1,GTF2H3
RXRA	viral transcription (GO:0019083)	54	98	19837	4985	4.79938e-11	1.58811e-07	RPL37,RPS16,RPS23,RPL14,RPL15,RPL13A,RPL27A,RPL34,RPL4,RPS3A,RPL29,RPL41,RPS29,RPSA,RPL10,RPL23,RPS27A,RPS3,RPS19,RPL7,RPS8,RPL39,RPL36A,RPL27,RPL26,RPL10A,RPL38,RPL18A,RPL36,RPL32,RPS26,RPS15,RPS20,RPS14,RPL11,RPLP0,RPS11,RPLP1,RPS6,RPS25,RPS13,RPL13,RPS12,RPLP2,RPL3,RPL35A,RPL18,RPS2,RPS15A,RPS7,RPL35,RPL9,RPL12,RPL21
RXRA	SRP-dependent cotranslational protein targeting to membrane (GO:0006614)	62	119	19816	4985	5.74298e-11	1.89978e-07	SSR3,SPCS3,RPL37,SPCS2,RPS16,RPS23,RPL14,RPL15,RPL13A,TRAM1,RPL27A,RPL34,SRP19,RPL4,RPS3A,SEC61B,RPL29,RPL41,RPS29,RPSA,RPL10,RPL23,RPS27A,RPS3,RPS19,RPL7,RPS8,RPL39,SPCS1,RPL36A,RPL27,RPL26,RPL10A,RPL38,RPL18A,RPL36,RPL32,RPS26,RPS15,RPS20,RPS14,RPL11,RPLP0,RPS11,RPLP1,RPS6,RPS25,RPS13,RPL13,RPS12,RPLP2,RPL3,RPL35A,RPL18,RPS2,RPS15A,RPS7,SSR4,RPL35,RPL9,RPL12,RPL21
RXRA	cellular protein metabolic process (GO:0044267)	158	404	19531	4985	9.88201e-11	3.26798e-07	SSR3,EEF1A1,EIF4B,GGCX,CANX,ALG10B,UGGT1,EIF4E,C1GALT1,GALNT2,GRPEL2,SPCS3,SEC24A,RPL37,EDEM1,MGAT4A,ST3GAL3,EIF4A1,B4GALT1,ALG2,EIF2S2,SPCS2,TIMM17A,TOMM22,RPS16,B4GALT3,EIF5,MAN1A2,VBP1,MGAT2,SRP54,RPS23,PIGV,PABPC1,RPL14,EIF3A,MAN1A1,MLEC,EIF4A2,EIF2S1,EIF2S3,TIMM8B,RPL15,EIF2B1,PIGW,PIGX,DHPS,HSPA9,CCT3,PIGU,CCT4,TIMM9,RPL13A,TRAM1,TCP1,RPL27A,SEC24C,CCT8,SPHK1,CCT5,ST3GAL2,GANAB,SEC23A,EIF5B…
RXRA	translational termination (GO:0006415)	54	100	19835	4985	1.37636e-10	4.55025e-07	RPL37,RPS16,RPS23,RPL14,RPL15,RPL13A,RPL27A,RPL34,RPL4,RPS3A,RPL29,RPL41,RPS29,RPSA,RPL10,RPL23,RPS27A,RPS3,RPS19,RPL7,RPS8,RPL39,RPL36A,RPL27,RPL26,RPL10A,RPL38,RPL18A,RPL36,RPL32,RPS26,RPS15,RPS20,RPS14,RPL11,RPLP0,RPS11,RPLP1,RPS6,RPS25,RPS13,RPL13,RPS12,RPLP2,RPL3,RPL35A,RPL18,RPS2,RPS15A,RPS7,RPL35,RPL9,RPL12,RPL21
RXRA	RNA splicing (GO:0008380)	78	165	19770	4985	1.59603e-10	5.27487e-07	PTBP1,SYNCRIP,HNRNPA3,HNRNPD,PCBP1,SRSF7,KIAA1967,SF3B3,NCBP1,HNRNPA2B1,CPSF7,PCBP2,HNRNPU,SRSF1,SRSF3,TARDBP,NUDT21,HNRNPK,HNRNPUL1,SF3B1,SCAF11,HNRNPA1,HNRNPA0,PPIG,CCAR1,RNPS1,NCBP2,HNRNPH3,POLR2H,PCF11,SRSF2,HNRNPR,SMC1A,SNRPB2,SNRPD3,CDK12,HNRNPF,PRPF8,POLR2B,DHX9,DHX15,SRSF5,FUS,SRRM1,CD2BP2,POLR2A,U2AF2,HNRNPH2,SNRPG,SF3A3,DHX8,DHX38,SNRPB,CSTF1,SF3B2,DDX23,SNRPE,SF3B14,SRSF4,SNRNP25,CLP1,…
RXRA	REACTOME_MEIOSIS	59	116	19819	4985	5.5376e-10	1.82962e-06	SMC3,BRCA1,H3F3B,RAD51,STAG2,STAG1,ATM,SYNE2,H2AFZ,TERF2IP,UBE2I,NBN,HIST2H2BE,SMC1A,HIST1H3B,HIST1H2BD,HIST1H2BJ,HIST1H2AE,HIST1H2AD,HIST1H3I,HIST1H2AB,HIST1H3H,HIST1H2BG,HIST1H2BF,HIST1H2BO,HIST1H3G,HIST1H3J,HIST1H3F,HIST2H2AC,HIST1H2AC,HIST1H2BC,HIST1H3D,POT1,FKBP6,SUN2,TERF2,CDK4,LMNB1,RAD50,H2AFX,HIST1H4H,HIST1H4J,HIST1H4L,HIST4H4,HIST1H4I,HIST1H4C,TOP3A,HIST1H4B,HIST1H4D,HIST1H2BH,HIST1H2BI…
RXRA	REACTOME_RNA_POL_I_RNA_POL_III_AND_MITOCHONDRIAL_TRANSCRIPTION	61	122	19813	4985	7.28841e-10	2.40736e-06	TBP,POLR3A,ZNF143,CBX3,H3F3B,POU2F1,GTF3C3,H2AFZ,MBD2,POLR2H,HIST2H2BE,TFAM,HIST1H3B,HIST1H2BD,HIST1H2BJ,HIST1H2AE,HIST1H2AD,HIST1H3I,HIST1H2AB,HIST1H3H,HIST1H2BG,HIST1H2BF,HIST1H2BO,HIST1H3G,HIST1H3J,HIST1H3F,HIST2H2AC,HIST1H2AC,HIST1H2BC,HIST1H3D,GTF3C2,UBTF,GTF3C4,POLR3F,MTERF,POLR1D,POLR3E,H2AFX,HIST1H4H,HIST1H4J,HIST1H4L,HIST4H4,HIST1H4I,HIST1H4C,POLR1B,POLRMT,GTF2H4,POLR3K,CCNH,HIST1H4B,HIS…
RXRA	REACTOME_MEIOTIC_SYNAPSIS	42	73	19862	4985	7.71573e-10	2.54773e-06	SMC3,BRCA1,STAG2,STAG1,SYNE2,H2AFZ,TERF2IP,UBE2I,HIST2H2BE,SMC1A,HIST1H2BD,HIST1H2BJ,HIST1H2AE,HIST1H2AD,HIST1H2AB,HIST1H2BG,HIST1H2BF,HIST1H2BO,HIST2H2AC,HIST1H2AC,HIST1H2BC,POT1,FKBP6,SUN2,TERF2,LMNB1,H2AFX,HIST1H4H,HIST1H4J,HIST1H4L,HIST4H4,HIST1H4I,HIST1H4C,HIST1H4B,HIST1H4D,HIST1H2BH,HIST1H2BI,TINF2,DIDO1,HIST1H2BK,REC8,ATR
RXRA	KEGG_SPLICEOSOME	63	128	19807	4985	9.25832e-10	3.05617e-06	HNRNPA3,PCBP1,RBM17,SRSF7,RBM22,DDX5,SF3B3,U2SURP,NAA38,TRA2B,NCBP1,ZMAT2,HNRNPU,PRPF40A,SRSF1,SRSF3,SRSF10,DDX42,ISY1,HNRNPK,SF3B1,HNRNPA1,NCBP2,SNW1,SRSF2,SNRPB2,SNRPD3,THOC4,PRPF8,DHX15,RBM25,SRSF5,U2AF2,HSPA8,SNRPG,SF3A3,DHX8,DHX38,SNRPB,SF3B2,DDX23,SART1,SNRPE,LSM7,SF3B14,SRSF4,PUF60,EFTUD2,U2AF1,SNRPA,THOC1,DDX39B,PRPF4,PHF5A,NHP2L1,SF3A2,SNRPA1,SNRPC,SNRNP200,CCDC12,PRPF6,LSM4,BUD31
RXRA	KEGG_CELL_CYCLE	62	128	19807	4985	2.79814e-09	9.23385e-06	MYC,SMC3,E2F1,GSK3B,YWHAZ,E2F3,CDKN2D,SMAD4,STAG2,SMAD3,CDC14B,STAG1,MDM2,CDK6,ATM,CDKN1A,GADD45B,DBF4,ORC4,ANAPC1,YWHAQ,ANAPC11,CDC27,SMC1A,BUB3,CUL1,YWHAB,MCM6,YWHAG,ABL1,SKP1,RBL1,ORC2,RB1,WEE1,MCM3,TP53,CHEK1,ORC5,CDC7,RBX1,CCND3,CDK4,GADD45A,CDC26,MAD2L2,MCM7,MCM4,CDKN2C,PCNA,PRKDC,GADD45G,ANAPC5,TGFB1,CCNH,BUB1B,BUB1,CHEK2,SKP2,MCM5,PTTG2,ATR
RXRA	transcription from RNA polymerase II promoter (GO:0006366)	119	298	19637	4985	3.96433e-09	1.30783e-05	CCNT2,TAF7,MEF2A,NFKB1,ETS1,POU5F1,SRF,BHLHE40,PAX5,GABPA,TBP,MAX,KAT2A,NFYA,CEBPB,EGR1,USF1,ZNF143,NFAT5,ARID4A,CTDP1,MLLT1,VEZF1,SUPT16H,SRSF7,NCOR1,COPS2,ZNF148,CEBPA,TAF4,KDM5A,MAF,NCBP1,TAF5,GTF2I,YBX2,KLF11,CPSF7,RNMT,TCEB1,SRSF1,SRSF3,TARDBP,AFF4,NUDT21,EPAS1,PKNOX1,NFE2L1,MNT,ZBTB7B,TCEA1,ZFHX3,GMEB2,ATF2,RNPS1,EGR2,RREB1,KLF13,NFATC3,NCBP2,POLR2H,PCF11,TGFB1I1,SRSF2,TBPL1,SNRPD3,AHR,CDK9…
RXRA	mRNA processing (GO:0006397)	38	66	19869	4985	4.1557e-09	1.37055e-05	PTBP1,SRSF7,SF3B3,NCBP1,HNRNPA2B1,CPSF7,SRSF1,NUDT21,SCAF11,HNRNPA1,HNRNPA0,NCBP2,PCF11,SRSF2,HNRNPR,SNRPB2,SNRPD3,SPOP,KHDRBS1,PRPF8,SRSF5,U2AF2,SNRPG,SON,SF3A3,SNRPB,LSM11,CSTF1,SF3B2,SNRPE,SLBP,SRSF4,CLP1,EFTUD2,U2AF1,CPSF3,SF3A2,CPSF1
RXRA	REACTOME_DEPOSITION_OF_NEW_CENPA_CONTAINING_NUCLEOSOMES_AT_THE_CENTROMERE	37	64	19871	4985	5.43602e-09	1.79225e-05	RBBP4,H2AFZ,CENPA,HIST2H2BE,CENPP,RSF1,HIST1H2BD,HIST1H2BJ,HIST1H2AE,HIST1H2AD,HIST1H2AB,HIST1H2BG,HIST1H2BF,HIST1H2BO,HIST2H2AC,HIST1H2AC,HIST1H2BC,CENPO,CASC5,RBBP7,H2AFX,HIST1H4H,HIST1H4J,HIST1H4L,HIST4H4,HIST1H4I,HIST1H4C,NPM1,OIP5,CENPN,HIST1H4B,HIST1H4D,HIST1H2BH,HIST1H2BI,MLF1IP,HIST1H2BK,CENPH
RXRA	PID_MYC_ACTIVPATHWAY	43	79	19856	4985	5.58485e-09	1.84077e-05	MYC,MAX,KAT2A,NCL,PIM1,E2F3,SMAD4,HSPA4,EIF4E,SMAD3,TRRAP,ODC1,EIF4A1,RCC1,TFRC,PFKM,PDCD10,NBN,PTMA,EIF2S1,CDCA7,LIN28B,PMAIP1,UBTF,TP53,TAF10,HSP90AA1,NME1,CDK4,HMGA1,DDX18,SERPINI1,LDHA,TK1,ENO1,KAT5,NPM1,TAF9,GAPDH,HSPD1,NME2,RPL11,BAX
RXRA	cellular lipid metabolic process (GO:0044255)	67	146	19789	4985	1.21494e-08	4.00323e-05	SIN3A,TBL1X,MED1,NCOA3,AGPAT3,NCOR1,ACSL3,HMGCR,RGL1,AGPS,PRKAB2,ELOVL2,NCOA1,NCOA2,CPT1A,FDFT1,PPARA,TBL1XR1,LPIN1,CPT2,GK,CHD9,IDH1,CARM1,CTGF,ABCA1,HSD17B4,FASN,GRHL1,ACSL5,AGPAT5,ELOVL6,PHYH,ACACA,ABCD1,CROT,HADHB,HADH,FADS1,ACOX1,AGT,CRAT,HADHA,SLC25A1,ACADVL,PLIN2,BDH1,SLC25A20,DGAT1,ACADM,HSD17B12,APOA2,APOA5,HMGCS2,ACADS,TGS1,ACOT8,DECR1,APOA1,FABP1,CYP1A1,ACOX2,ACOX3,MCEE,SULT2A1,PCCA,AB…
RXRA	REACTOME_CLEAVAGE_OF_GROWING_TRANSCRIPT_IN_THE_TERMINATION_REGION_	28	44	19891	4985	1.22941e-08	4.04968e-05	SRSF7,NCBP1,CPSF7,SRSF1,SRSF3,NUDT21,RNPS1,NCBP2,PCF11,SRSF2,SNRPD3,THOC4,SRSF5,SRRM1,U2AF2,SNRPG,DHX38,SNRPB,LSM11,CSTF1,SNRPE,SLBP,NFX1,SRSF4,CLP1,U2AF1,CPSF3,CPSF1
RXRA	REACTOME_RNA_POL_I_PROMOTER_OPENING	35	62	19873	4985	3.10263e-08	0.000102169	H3F3B,H2AFZ,MBD2,HIST2H2BE,HIST1H3B,HIST1H2BD,HIST1H2BJ,HIST1H2AE,HIST1H2AD,HIST1H3I,HIST1H2AB,HIST1H3H,HIST1H2BG,HIST1H2BF,HIST1H2BO,HIST1H3G,HIST1H3J,HIST1H3F,HIST2H2AC,HIST1H2AC,HIST1H2BC,HIST1H3D,UBTF,H2AFX,HIST1H4H,HIST1H4J,HIST1H4L,HIST4H4,HIST1H4I,HIST1H4C,HIST1H4B,HIST1H4D,HIST1H2BH,HIST1H2BI,HIST1H2BK
RXRA	RNA metabolic process (GO:0016070)	116	298	19637	4985	3.33157e-08	0.000109675	RBFOX2,PSME3,PPP2R1A,HNRNPD,YWHAZ,EIF4B,CNOT6L,CNOT8,NCBP1,XRN2,EIF4E,RPL37,CNOT2,EIF4A1,XPO1,SMG6,PSMD3,PSMD1,ZFP36L1,SET,SMG1,RNPS1,NCBP2,RPS16,DCP2,SNRPD3,RPS23,YWHAB,DDX20,PSMD7,PABPC1,RPL14,CNOT6,EIF4A2,EDC4,PSMF1,SMG7,RPL15,HSPA8,UBC,SNRPG,SNRPB,RPL13A,UPF2,PRKCD,RPL27A,SNRPE,LSM7,PSMD9,SMG5,RPL34,DDX54,PAN2,RPL4,SNUPN,PSMA4,RPS3A,RPL29,CNOT4,PSMB4,RPL41,PRMT5,PSMB9,RPS29,DCP1B,RPSA,TGS1,RP…
RXRA	REACTOME_TELOMERE_MAINTENANCE	40	75	19860	4985	3.76942e-08	0.000124052	H2AFZ,TERF2IP,HIST2H2BE,HIST1H2BD,HIST1H2BJ,HIST1H2AE,HIST1H2AD,HIST1H2AB,HIST1H2BG,HIST1H2BF,HIST1H2BO,HIST2H2AC,HIST1H2AC,HIST1H2BC,POT1,DNA2,TERF2,POLD3,POLA1,FEN1,H2AFX,HIST1H4H,HIST1H4J,HIST1H4L,HIST4H4,HIST1H4I,HIST1H4C,PCNA,HIST1H4B,HIST1H4D,HIST1H2BH,HIST1H2BI,PRIM1,TINF2,POLA2,WRAP53,HIST1H2BK,RFC2,POLD1,RFC4
RXRA	REACTOME_PACKAGING_OF_TELOMERE_ENDS	29	48	19887	4985	4.25561e-08	0.00014001	H2AFZ,TERF2IP,HIST2H2BE,HIST1H2BD,HIST1H2BJ,HIST1H2AE,HIST1H2AD,HIST1H2AB,HIST1H2BG,HIST1H2BF,HIST1H2BO,HIST2H2AC,HIST1H2AC,HIST1H2BC,POT1,TERF2,H2AFX,HIST1H4H,HIST1H4J,HIST1H4L,HIST4H4,HIST1H4I,HIST1H4C,HIST1H4B,HIST1H4D,HIST1H2BH,HIST1H2BI,TINF2,HIST1H2BK
RXRA	translation (GO:0006412)	61	133	19802	4985	5.04605e-08	0.000165965	SSR3,EEF1A1,EIF4B,EIF4G2,EIF4E,SPCS3,EIF4EBP2,EIF4A1,PABPC4,EIF2S2,EIF1,SPCS2,EIF5,SRP54,IGF2BP3,PABPC1,EIF3A,EIF4A2,EIF2S1,EIF2S3,EIF2B1,DHPS,TRAM1,COPS5,RRBP1,EIF5B,EIF2B5,SRP19,EIF4E2,FARSB,EEF2,SEC61B,EEF1G,EIF3F,EIF3D,RPS29,SRP14,RPSA,RPS27A,RPS19,RPS8,EIF2B2,MRPS7,SPCS1,EIF2B4,RPS26,RPS15,RPS20,RPS14,RPS25,RPS13,RPS12,RPS7,MTIF3,SSR4,MRPL51,NACA,GTF2H3,RPS6KB2,EEF1B2,MRPS24
RXRA	REACTOME_METABOLISM_OF_PROTEINS	181	518	19417	4985	1.24196e-07	0.000408355	SSR3,EEF1A1,EIF4B,GGCX,CANX,CS,ALG10B,XRN2,UGGT1,EIF4E,ARFGEF2,C1GALT1,GALNT2,GRPEL2,SPCS3,RPL37,FBXW2,EDEM1,MGAT4A,ST3GAL3,EIF4A1,AP3M1,B4GALT1,ALG2,FBXW7,EIF2S2,SPCS2,TIMM17A,TOMM22,RPS16,SLC25A12,B4GALT3,EIF5,MAN1A2,VBP1,MGAT2,SRP54,RPS23,SEC61A1,PIGV,LONP2,SLC25A4,PABPC1,RPL14,FXN,EIF3A,MAN1A1,MLEC,EIF4A2,EIF2S1,EIF2S3,TIMM8B,RPL15,EIF2B1,ARSB,PIGW,PIGX,COQ2,DHPS,HSPA9,CCT3,PIGU,CCT4,TIMM9,RP…
RXRA	REACTOME_MEIOTIC_RECOMBINATION	43	86	19849	4985	1.60817e-07	0.000528605	BRCA1,H3F3B,RAD51,ATM,H2AFZ,NBN,HIST2H2BE,HIST1H3B,HIST1H2BD,HIST1H2BJ,HIST1H2AE,HIST1H2AD,HIST1H3I,HIST1H2AB,HIST1H3H,HIST1H2BG,HIST1H2BF,HIST1H2BO,HIST1H3G,HIST1H3J,HIST1H3F,HIST2H2AC,HIST1H2AC,HIST1H2BC,HIST1H3D,CDK4,RAD50,H2AFX,HIST1H4H,HIST1H4J,HIST1H4L,HIST4H4,HIST1H4I,HIST1H4C,TOP3A,HIST1H4B,HIST1H4D,HIST1H2BH,HIST1H2BI,MSH5,HIST1H2BK,MLH1,BLM
RXRA	REACTOME_HIV_LIFE_CYCLE	57	125	19810	4985	1.6429e-07	0.000539856	CCNT2,RDBP,TBP,PSIP1,CTDP1,SUPT16H,TAF4,NCBP1,TAF5,LIG4,RNMT,TCEB1,RCC1,NUP153,XPO1,TCEA1,NUP188,NCBP2,POLR2H,NMT1,TPR,WHSC2,CDK9,POLR2B,BANF1,POLR2A,VPS37D,GTF2E2,TSG101,VPS37C,TAF10,PPIA,NUP210,HMGA1,TAF6,XRCC6,NUP205,FEN1,SUPT5H,XRCC5,POLR2C,TAF9,SUPT4H1,GTF2H4,NUP62,CXCR4,RANBP1,CCNH,GTF2A1,NUP54,NUP88,RPS27A,POLR2L,COBRA1,CCNT1,GTF2H3,NUPL2
RXRA	REACTOME_CELL_CYCLE_MITOTIC	122	325	19610	4985	1.68206e-07	0.000552558	MYC,SMC3,E2F1,MAX,UBE2D1,PPP2R1A,E2F3,RBBP4,CDKN2D,CEP57,BTRC,STAG2,LIN54,CKS1B,CLASP1,RRM2,STAG1,NSL1,AHCTF1,CDK6,CEP135,CDKN1A,GMNN,XPO1,PSMD3,DBF4,ORC4,PSMD1,NINL,PCM1,CSNK1D,ANAPC1,CENPA,ANAPC11,CDC27,CENPJ,SMC1A,BUB3,PLK4,ZWILCH,CUL1,CENPP,MCM6,PSMD7,DSN1,YWHAG,CENPL,PPP2R5C,SKP1,RBL1,PSMF1,PPP2R5B,ORC2,TUBGCP3,RB1,WEE1,CENPO,MCM3,TUBB,ORC5,KIF2A,CDC7,HSP90AA1,MIS12,DNA2,CCND3,CDK4,POLD3,POL…
RXRA	REACTOME_HIV_INFECTION	84	207	19728	4985	2.59331e-07	0.000851642	CCNT2,RDBP,TBP,ARF1,PSIP1,CTDP1,SUPT16H,KPNA1,TAF4,BTRC,NCBP1,TAF5,LIG4,RNMT,TCEB1,RCC1,NUP153,XPO1,PSMD3,PSMD1,TCEA1,NUP188,NCBP2,POLR2H,NMT1,TPR,WHSC2,CDK9,POLR2B,PSMD7,SLC25A4,KPNB1,SKP1,PSMF1,BANF1,POLR2A,VPS37D,GTF2E2,AP1G1,TSG101,VPS37C,TAF10,RBX1,B2M,PPIA,AP2M1,NUP210,HMGA1,AP1B1,TAF6,PSMD9,XRCC6,NUP205,AP2A1,FEN1,SUPT5H,LCK,NPM1,XRCC5,POLR2C,TAF9,PSMA4,SUPT4H1,GTF2H4,NUP62,CXCR4,RANBP1,PS…
RXRA	BIOCARTA_EIF_PATHWAY	13	16	19919	4985	2.6049e-07	0.000855188	EIF4G2,EIF4E,EEF2K,EIF4A1,EIF2S2,EIF1,EIF5,EIF3A,EIF4A2,EIF2S1,EIF2S3,EEF2,EIF6
RXRA	termination of RNA polymerase II transcription (GO:0006369)	27	46	19889	4985	2.68443e-07	0.000881029	SRSF7,NCBP1,CPSF7,SRSF1,SRSF3,NUDT21,RNPS1,NCBP2,PCF11,SRSF2,SNRPD3,MAZ,SRSF5,SRRM1,U2AF2,SNRPG,DHX38,SNRPB,LSM11,CSTF1,SNRPE,SLBP,SRSF4,CLP1,U2AF1,CPSF3,CPSF1
RXRA	mRNA metabolic process (GO:0016071)	105	274	19661	4985	3.40377e-07	0.00111678	PSME3,PPP2R1A,HNRNPD,YWHAZ,EIF4B,CNOT6L,CNOT8,NCBP1,EIF4E,RPL37,CNOT2,EIF4A1,XPO1,SMG6,PSMD3,PSMD1,ZFP36L1,SET,SMG1,RNPS1,NCBP2,RPS16,DCP2,RPS23,YWHAB,PSMD7,PABPC1,RPL14,CNOT6,EIF4A2,EDC4,PSMF1,SMG7,RPL15,HSPA8,UBC,RPL13A,UPF2,PRKCD,RPL27A,LSM7,PSMD9,SMG5,RPL34,PAN2,RPL4,PSMA4,RPS3A,RPL29,CNOT4,PSMB4,RPL41,PSMB9,RPS29,DCP1B,RPSA,RPL10,UBB,RPL23,RPS27A,RPS3,RPS19,RPL7,RPS8,RPL39,RPL36A,PSMD6,RPL27…
RXRA	BIOCARTA_ATM_PATHWAY	15	20	19915	4985	3.8211e-07	0.00125332	NFKB1,JUN,BRCA1,RAD51,MDM2,ATM,NFKBIA,CDKN1A,NBN,ABL1,TP53,CHEK1,GADD45A,RAD50,CHEK2
RXRA	REACTOME_MRNA_3_END_PROCESSING	22	35	19900	4985	4.39279e-07	0.0014404	SRSF7,NCBP1,CPSF7,SRSF1,SRSF3,NUDT21,RNPS1,NCBP2,PCF11,SRSF2,THOC4,SRSF5,SRRM1,U2AF2,DHX38,CSTF1,NFX1,SRSF4,CLP1,U2AF1,CPSF3,CPSF1
RXRA	mitotic cell cycle (GO:0000278)	126	344	19591	4985	5.19608e-07	0.00170327	SMC3,E2F1,UBE2D1,PSME3,PPP2R1A,E2F3,RBBP4,CDKN2D,CEP57,BTRC,STAG2,LIN54,CKS1B,CLASP1,RRM2,STAG1,NSL1,AHCTF1,CDK6,CEP135,CDKN1A,GMNN,XPO1,PSMD3,DBF4,ORC4,PSMD1,NINL,PCM1,CSNK1D,ANAPC1,CENPA,USP3,ANAPC11,CDC27,CENPJ,SMC1A,BUB3,PLK4,ZWILCH,CUL1,CENPP,MCM6,PSMD7,DSN1,PHF13,YWHAG,CENPL,SKP1,RBL1,PSMF1,ORC2,TUBGCP3,RB1,WEE1,CENPO,MCM3,UBC,TUBB,ORC5,KIF2A,CDC7,HSP90AA1,NUP160,MIS12,DNA2,CDK4,POLD3,POLA1…
RXRA	REACTOME_RNA_POL_I_TRANSCRIPTION	43	89	19846	4985	5.62512e-07	0.00184335	CBX3,H3F3B,H2AFZ,MBD2,POLR2H,HIST2H2BE,HIST1H3B,HIST1H2BD,HIST1H2BJ,HIST1H2AE,HIST1H2AD,HIST1H3I,HIST1H2AB,HIST1H3H,HIST1H2BG,HIST1H2BF,HIST1H2BO,HIST1H3G,HIST1H3J,HIST1H3F,HIST2H2AC,HIST1H2AC,HIST1H2BC,HIST1H3D,UBTF,POLR1D,H2AFX,HIST1H4H,HIST1H4J,HIST1H4L,HIST4H4,HIST1H4I,HIST1H4C,POLR1B,GTF2H4,CCNH,HIST1H4B,HIST1H4D,HIST1H2BH,HIST1H2BI,TAF1B,HIST1H2BK,GTF2H3
RXRA	REACTOME_FATTY_ACID_TRIACYLGLYCEROL_AND_KETONE_BODY_METABOLISM	70	168	19767	4985	6.79167e-07	0.00222495	SIN3A,SREBF1,NFYA,SREBF2,TBL1X,MED1,NCOA3,AGPAT3,NCOR1,MED14,ACSL3,HMGCR,PRKAB2,ELOVL2,MED29,NCOA1,NCOA2,CPT1A,FDFT1,PPARA,TBL1XR1,LPIN1,CPT2,CDK19,GK,CTGF,ABCA1,FASN,GRHL1,ACSL5,AGPAT5,ELOVL6,ESRRA,ACACA,MED18,HADHB,HADH,MED15,FADS1,YAP1,ACOX1,AGT,HADHA,SLC25A1,ACADVL,PLIN2,NR1D1,BDH1,SLC25A20,DGAT1,ACADM,LPCAT4,MED23,HSD17B12,MED20,TEAD4,APOA2,APOA5,HMGCS2,ACADS,MED11,TGS1,DECR1,APOA1,FABP1,CYP…
RXRA	PID_TELOMERASEPATHWAY	35	68	19867	4985	7.20623e-07	0.00236004	SIN3A,MYC,NFKB1,JUN,E2F1,MAX,NR2F2,NCL,MAPK1,RBBP4,PTGES3,SMAD3,UBE3A,ATM,SP3,SMG6,TERF2IP,ZNFX1,NBN,ABL1,HSP90AA1,POT1,TERF2,RAD50,XRCC6,SMG5,RBBP7,PIF1,XRCC5,TGFB1,TINF2,HUS1,BLM,PARP2,SAP30
RXRA	PID_BARD1PATHWAY	19	29	19906	4985	7.81814e-07	0.00255966	BRCA1,RAD51,ATM,NBN,FANCD2,UBE2D3,EWSR1,TP53,CSTF1,RAD50,XRCC6,FANCC,NPM1,XRCC5,PCNA,PRKDC,FANCG,BARD1,ATR
RXRA	REACTOME_LATE_PHASE_OF_HIV_LIFE_CYCLE	48	104	19831	4985	8.29142e-07	0.00271378	CCNT2,RDBP,TBP,CTDP1,SUPT16H,TAF4,NCBP1,TAF5,RNMT,TCEB1,RCC1,NUP153,XPO1,TCEA1,NUP188,NCBP2,POLR2H,NMT1,TPR,WHSC2,CDK9,POLR2B,POLR2A,VPS37D,GTF2E2,TSG101,VPS37C,TAF10,NUP210,TAF6,NUP205,SUPT5H,POLR2C,TAF9,SUPT4H1,GTF2H4,NUP62,RANBP1,CCNH,GTF2A1,NUP54,NUP88,RPS27A,POLR2L,COBRA1,CCNT1,GTF2H3,NUPL2
RXRA	KEGG_DNA_REPLICATION	22	36	19899	4985	9.27962e-07	0.00303629	MCM6,POLE3,POLE4,MCM3,DNA2,POLD3,POLA1,RNASEH1,MCM7,FEN1,MCM4,RNASEH2C,RNASEH2B,PCNA,PRIM1,POLA2,SSBP1,RFC2,RNASEH2A,POLD1,RFC4,MCM5
RXRA	KEGG_P53_SIGNALING_PATHWAY	35	69	19866	4985	1.14517e-06	0.00374585	MDM4,SIAH1,RRM2B,RRM2,MDM2,CDK6,ATM,CDKN1A,BBC3,GADD45B,CCNG2,CYCS,CASP3,PPM1D,PTEN,SERPINE1,ZMAT3,PERP,APAF1,CCNG1,RFWD2,PMAIP1,TP53,CHEK1,CCND3,CDK4,GADD45A,GADD45G,CASP9,DDB2,TP53I3,CASP8,BAX,CHEK2,ATR
RXRA	PID_ATM_PATHWAY	21	34	19901	4985	1.16708e-06	0.00381635	SMC3,BRCA1,CTBP1,MDM2,ATM,NBN,SMC1A,FANCD2,YWHAB,RFWD2,ABL1,TERF2,MDC1,RAD17,RAD50,H2AFX,KAT5,TOP3A,UIMC1,BLM,CHEK2
RXRA	PID_P53DOWNSTREAMPATHWAY	59	137	19798	4985	1.17596e-06	0.0038442	FOXA1,SMARCA4,ATF3,JUN,E2F1,KAT2A,NFYA,BCL2L1,E2F3,DDX5,ARID3A,JMY,RPS27L,RRM2B,TRRAP,MDM2,CDKN1A,BBC3,BCL2L2,TP53INP1,BCL2,PTEN,DDIT4,SERPINE1,CARM1,PERP,APAF1,NFYC,HIC1,CCNG1,DKK1,HTT,RFWD2,RB1,PMAIP1,PPP1R13B,CX3CL1,TP53,TAP1,PML,NDRG1,PRKAB1,DUSP1,TP53BP2,GADD45A,DUSP5,DROSHA,IRF5,AIFM2,BCL2A1,TAF9,PCNA,FDXR,DDB2,TP53I3,GDF15,BAX,MLH1,PMS2
RXRA	REACTOME_TRANSPORT_OF_MATURE_TRANSCRIPT_TO_CYTOPLASM	29	54	19881	4985	1.58414e-06	0.00517698	SRSF7,NCBP1,EIF4E,SRSF1,SRSF3,NUP153,NUP188,RNPS1,NCBP2,SRSF2,TPR,THOC4,SRSF5,SRRM1,U2AF2,DHX38,NUP210,SLBP,NFX1,NXF1,SRSF4,NUP205,U2AF1,CPSF3,NUP62,NUP54,NUP88,CPSF1,NUPL2
RXRA	induction of apoptosis by intracellular signals (GO:0008629)	22	37	19898	4985	1.87123e-06	0.0061133	CUL3,BCL2L1,PPP3R1,XIAP,CDKN1A,BBC3,CYCS,BCL2,CASP3,CASP7,NMT1,APAF1,CUL1,YWHAB,CUL4A,PMAIP1,TP53,MSH6,DYNLL1,CASP9,CASP8,BAX
RXRA	REACTOME_TRANSLATION	86	222	19713	4985	1.9901e-06	0.00649966	SSR3,EEF1A1,EIF4B,EIF4E,SPCS3,RPL37,EIF4A1,EIF2S2,SPCS2,RPS16,EIF5,SRP54,RPS23,SEC61A1,PABPC1,RPL14,EIF3A,EIF4A2,EIF2S1,EIF2S3,RPL15,EIF2B1,RPL13A,TRAM1,RPL27A,EIF5B,EIF2B5,RPL34,SRP19,EEF2,RPL4,RPS3A,SEC61B,RPL29,EEF1G,EIF3F,EIF3D,RPL41,RPS29,SRP14,RPSA,RPL10,RPL23,RPS27A,RPS3,RPS19,RPL7,RPS8,RPL39,EIF2B2,SPCS1,RPL36A,RPL27,RPL26,RPL10A,RPL38,EIF2B4,RPL18A,RPL36,RPL32,RPS26,RPS15,RPS20,RPS14,RPL…
RXRA	KEGG_PYRIMIDINE_METABOLISM	45	98	19837	4985	2.02549e-06	0.00661324	POLR3A,DCTD,DCK,RRM2B,RRM2,ENTPD1,POLR2H,NT5E,POLR2B,AK3,DHODH,NME6,POLE3,CTPS,POLE4,CMPK1,POLR2A,POLR3F,UMPS,NME1,POLD3,POLA1,POLR1D,TK1,ENTPD5,NT5C3,POLR1B,TYMS,UCKL1,NUDT2,POLR2C,RRM1,POLR3K,UPP1,POLR3B,PRIM1,POLR2L,POLA2,NME2,NME1-NME2,NME3,POLD1,DTYMK,TYMP,ENTPD8
RXRA	REACTOME_METABOLISM_OF_LIPIDS_AND_LIPOPROTEINS	163	478	19457	4985	2.65982e-06	0.00868167	SIN3A,SREBF1,NFYA,SREBF2,TBL1X,ARF1,CRLS1,MED1,NCOA3,AGPAT3,NCOR1,PIK3R3,MED14,ACSL3,HMGCR,CDS2,PI4K2B,AGPS,ETNK1,LPCAT3,SLC10A2,SGMS1,PRKAB2,ELOVL2,MTTP,SC5DL,VAPB,MED29,NCOA1,MTM1,NCOA2,CPT1A,PIK3R2,SRD5A3,FDFT1,GGPS1,EPT1,PPARA,TBL1XR1,LPIN1,CPT2,PTEN,CDK19,UGCG,P4HB,GK,COL4A3BP,GPCPD1,IDH1,SYNJ2,STARD4,PLD1,CTGF,ABCA1,HSD17B4,FASN,SLC44A1,GRHL1,CEPT1,ACSL5,AGPAT5,SACM1L,ELOVL6,PHYH,ESRRA,ABCG…
RXRA	BIOCARTA_P53_PATHWAY	12	16	19919	4985	3.75693e-06	0.0122588	E2F1,MDM2,ATM,CDKN1A,BCL2,APAF1,RB1,TP53,CDK4,GADD45A,PCNA,BAX
RXRA	REACTOME_AMYLOIDS	39	83	19852	4985	4.08891e-06	0.013338	H3F3B,H2AFZ,APP,HIST2H2BE,HIST1H3B,HIST1H2BD,HIST1H2BJ,HIST1H2AE,HIST1H2AD,HIST1H3I,HIST1H2AB,HIST1H3H,HIST1H2BG,HIST1H2BF,HIST1H2BO,HIST1H3G,HIST1H3J,HIST1H3F,HIST2H2AC,HIST1H2AC,HIST1H2BC,HIST1H3D,GSN,B2M,FGA,LYZ,H2AFX,HIST1H4H,HIST1H4J,HIST1H4L,HIST4H4,HIST1H4I,HIST1H4C,HIST1H4B,HIST1H4D,HIST1H2BH,HIST1H2BI,APOA1,HIST1H2BK
RXRA	REACTOME_DNA_REPLICATION	75	192	19743	4985	5.58648e-06	0.0182175	SMC3,E2F1,PPP2R1A,E2F3,STAG2,CLASP1,STAG1,NSL1,AHCTF1,CDKN1A,GMNN,XPO1,PSMD3,DBF4,ORC4,PSMD1,CENPA,SMC1A,BUB3,ZWILCH,CENPP,MCM6,PSMD7,DSN1,CENPL,PPP2R5C,PSMF1,PPP2R5B,ORC2,RB1,CENPO,MCM3,ORC5,KIF2A,CDC7,MIS12,DNA2,POLD3,POLA1,FBXO5,CASC5,PPP2R5A,PSMD9,MCM8,MCM7,GINS1,FEN1,MCM4,PCNA,PSMA4,PSMB4,PSMB9,CENPN,MCM10,PRIM1,MLF1IP,BUB1B,RPS27A,KIF18A,POLA2,PSMD6,CENPM,APITD1,PSMA1,BUB1,PSMB1,RFC2,CENPH,…
RXRA	RNA processing (GO:0006396)	24	44	19891	4985	6.79514e-06	0.0221521	RBMS1,SYNCRIP,HNRNPD,HNRPDL,RBM14-RBM4,XRN2,RBM3,HNRNPU,HNRNPK,HNRNPUL1,PABPC4,HNRNPH3,HNRNPF,SETX,DUSP11,DDX20,RBM39,DHX8,CSTF1,DDX54,RBM6,THOC1,PRPF4,HNRNPL
RXRA	REACTOME_PROCESSING_OF_CAPPED_INTRONLESS_PRE_MRNA	15	23	19912	4985	8.70682e-06	0.0283755	NCBP1,CPSF7,NUDT21,NCBP2,PCF11,SNRPD3,SNRPG,SNRPB,LSM11,CSTF1,SNRPE,SLBP,CLP1,CPSF3,CPSF1
RXRA	REACTOME_INTRINSIC_PATHWAY_FOR_APOPTOSIS	18	30	19905	4985	1.00828e-05	0.0328496	E2F1,BCL2L1,PPP3R1,XIAP,BBC3,CYCS,BCL2,CASP3,CASP7,NMT1,APAF1,YWHAB,PMAIP1,TP53,DYNLL1,CASP9,CASP8,BAX
RXRA	BIOCARTA_ATRBRCA_PATHWAY	14	21	19914	4985	1.015e-05	0.0330585	BRCA1,RAD51,ATM,NBN,FANCD2,TP53,CHEK1,RAD17,RAD50,FANCC,FANCG,HUS1,CHEK2,ATR
RXRA	BIOCARTA_HIVNEF_PATHWAY	29	58	19877	4985	1.1033e-05	0.0359233	NFKB1,LMNB2,CRADD,XIAP,CHUK,PTK2,MDM2,NFKBIA,CYCS,BCL2,CASP3,CASP7,APAF1,DAXX,RASA1,GSN,MAP3K5,RB1,BIRC3,CFLAR,PRKCD,LMNB1,ACTG1,PRKDC,CASP9,CDK11A,BIRC2,CASP8,CDK11B
RXRA	PID_PI3KCIAKTPATHWAY	20	35	19900	4985	1.16641e-05	0.0379644	GSK3B,BCL2L1,YWHAZ,KPNA1,RAF1,RICTOR,CHUK,PDPK1,FOXO1,CDKN1A,YWHAQ,GSK3A,YWHAB,YWHAG,MAP3K5,SLC2A4,HSP90AA1,AKT2,PRKDC,CASP9
RXRA	REACTOME_MRNA_SPLICING_MINOR_PATHWAY	24	45	19890	4985	1.16634e-05	0.0379644	SRSF7,SF3B3,NCBP1,SRSF1,SF3B1,NCBP2,POLR2H,SRSF2,SNRPD3,PRPF8,POLR2B,POLR2A,SNRPG,SNRPB,SF3B2,DDX23,SNRPE,SF3B14,EFTUD2,POLR2C,NHP2L1,POLR2L,SNRNP200,PRPF6
RXRA	mRNA 3'-end processing (GO:0031124)	20	35	19900	4985	1.16641e-05	0.0379644	SRSF7,NCBP1,CPSF7,SRSF1,SRSF3,NUDT21,RNPS1,NCBP2,PCF11,SRSF2,SRSF5,SRRM1,U2AF2,DHX38,CSTF1,SRSF4,CLP1,U2AF1,CPSF3,CPSF1
RXRA	PID_AR_PATHWAY	30	61	19874	4985	1.26084e-05	0.0410026	SRF,BRCA1,PA2G4,MED1,ZMIZ1,HIP1,PATZ1,UBE3A,CDK6,CTDSP1,NCOA2,CTNNB1,HNRNPA1,PIAS1,UBE2I,TGFB1I1,CARM1,CTDSP2,NCOA4,GSN,PTK2B,CCND3,XRCC6,KDM3A,XRCC5,PRKDC,PRDX1,CASP8,CDK11B,ZNF318
RXRA	REACTOME_RNA_POL_II_PRE_TRANSCRIPTION_EVENTS	30	61	19874	4985	1.26084e-05	0.0410026	CCNT2,RDBP,TBP,CTDP1,SUPT16H,TAF4,NCBP1,TAF5,TCEB1,TCEA1,NCBP2,POLR2H,WHSC2,CDK9,POLR2B,POLR2A,GTF2E2,TAF10,TAF6,SUPT5H,POLR2C,TAF9,SUPT4H1,GTF2H4,CCNH,GTF2A1,POLR2L,COBRA1,CCNT1,GTF2H3
RXRA	REACTOME_METABOLISM_OF_NUCLEOTIDES	34	72	19863	4985	1.26375e-05	0.0410719	DCTD,DCK,RRM2B,RRM2,ADSS,NT5E,ADK,DHODH,PPAT,CTPS,CMPK1,AMPD3,UMPS,AMPD2,NME1,TK1,NT5C3,TYMS,CAT,GART,RRM1,PAICS,ADAL,UPP1,NME2,NME1-NME2,ADSSL1,GUK1,APRT,GMPS,IMPDH2,ATIC,DTYMK,TYMP
RXRA	REACTOME_CIRCADIAN_CLOCK	27	53	19882	4985	1.28048e-05	0.0416028	NR3C1,SREBF1,BHLHE40,TBL1X,NAMPT,MED1,NCOA3,NCOR1,BTRC,HIF1A,NCOA1,NCOA2,CPT1A,PPARA,TBL1XR1,ATF2,CREB1,CSNK1D,SERPINE1,CUL1,SKP1,CCRN4L,PER1,NR1D1,TGS1,RPS27A,F7
RXRA	REACTOME_METABOLISM_OF_RNA	116	330	19605	4985	1.31072e-05	0.0425723	DCP1A,PPP2R1A,HNRNPD,YWHAZ,EIF4B,CNOT8,NCBP1,EIF4E,RPL37,CNOT2,EIF4A1,NUP153,XPO1,SMG6,PSMD3,PSMD1,ZFP36L1,SMG1,NUP188,RNPS1,NCBP2,RPS16,DCP2,TPR,SNRPD3,RPS23,YWHAB,DDX20,PSMD7,PABPC1,RPL14,CNOT6,EIF4A2,EDC4,PSMF1,SMG7,RPL15,HSPA8,SNRPG,SNRPB,RPL13A,UPF2,PRKCD,RPL27A,NUP210,SNRPE,PSMD9,SMG5,RPL34,NUP205,RPL4,SNUPN,PSMA4,RPS3A,NUP62,RPL29,CNOT4,PSMB4,RPL41,PRMT5,PSMB9,RPS29,DCP1B,RPSA,TGS1,RPL10,N…
RXRA	telomere maintenance (GO:0000723)	29	59	19876	4985	1.70979e-05	0.0555167	PTGES3,SMG6,TERF2IP,NBN,DCLRE1B,DNA2,TERF2,OBFC1,POLD3,POLA1,RAD50,XRCC6,FEN1,HIST1H4H,HIST1H4J,HIST1H4L,HIST4H4,HIST1H4I,HIST1H4C,XRCC5,PCNA,HIST1H4B,HIST1H4D,PRIM1,TINF2,POLA2,RFC2,POLD1,RFC4
RXRA	KEGG_CHRONIC_MYELOID_LEUKEMIA	34	73	19862	4985	1.84706e-05	0.0599555	MYC,NFKB1,E2F1,BCL2L1,E2F3,MAPK1,PIK3R3,CTBP1,RAF1,NRAS,MECOM,SMAD4,CHUK,SMAD3,CBL,RUNX1,MDM2,CDK6,STAT5B,NFKBIA,CDKN1A,PIK3R2,TGFBR2,CRKL,ABL1,CBLB,SHC1,RB1,TP53,AKT2,CDK4,IKBKG,BRAF,TGFB1
RXRA	BIOCARTA_CHEMICAL_PATHWAY	14	22	19913	4985	2.44943e-05	0.0794841	STAT1,BCL2L1,PTK2,ATM,CYCS,BCL2,CASP3,CASP7,APAF1,EIF2S1,TP53,TLN1,CASP9,BAX
RXRA	phospholipid efflux (GO:0033700)	8	10	19925	4985	2.948e-05	0.0956331	ABCA1,ABCG1,APOA2,APOC3,APOE,APOA1,APOC4,APOC1
SMARCA4	REACTOME_METABOLISM_OF_PORPHYRINS	3	14	19921	76	1.89655e-07	0.000630793	HMBS,BLVRB,PPOX
SMARCA4	porphyrin-containing compound metabolic process (GO:0006778)	3	15	19920	76	2.57874e-07	0.00085743	HMBS,BLVRB,PPOX
SMARCA4	heme biosynthetic process (GO:0006783)	2	13	19922	76	1.48167e-05	0.0492507	HMBS,PPOX
SMARCA4	KEGG_PORPHYRIN_AND_CHLOROPHYLL_METABOLISM	3	41	19894	76	1.77475e-05	0.058975	HMBS,BLVRB,PPOX
SUZ12	regulation of transcription, DNA-dependent (GO:0006355)	54	349	19586	599	3.17153e-24	1.05485e-20	FOXA1,ATF3,GATA3,RUNX3,NR2F2,EGR3,RORB,FLI1,ELAVL2,TBR1,NFIX,DLX2,PAX6,DLX6,FOXC1,DLX3,PITX2,DMRT1,NKX2-8,POU3F2,LMX1B,HIC1,HOXD13,ZIC1,PHOX2B,SIM1,PAX7,TP73,PAX3,FOXD2,PTF1A,MAFA,GATA4,WT1,SIX1,SOX17,SIM2,HAND2,BNC1,ALX1,PAX8,FOXL1,FEV,CDX2,NFIC,SHOX,GBX2,PDX1,HSF4,NKX2-6,ATOH1,POU3F3,EVX1,POU4F3
SUZ12	positive regulation of transcription from RNA polymerase II promoter (GO:0045944)	55	366	19569	599	5.35138e-24	1.77933e-20	TAL1,GATA2,FOXA2,GATA3,TFAP2A,ARNTL,FOXD3,NHLH2,NKX2-1,HAND1,OTX2,NFIX,POU4F2,NEUROD1,FOXC1,FOXQ1,FOXE1,WNT3A,ASCL1,PITX2,POU4F1,FOXF2,DMRT1,OSR1,HHEX,FOXG1,FOXL2,TBX5,NEUROG1,TBX1,PHOX2B,TP73,ONECUT1,HOXA5,PAX3,FOXD2,GRIN1,RARG,SIX1,NKX2-5,GREM1,HAND2,PAX8,WNT2,EOMES,WNT7A,NFIC,FOXE3,PDX1,FOXC2,GATA5,CDKN2A,GSX1,NKX6-1,TBX20
SUZ12	pattern specification process (GO:0007389)	19	50	19885	599	5.35328e-18	1.77943e-14	FOXA1,FOXD3,LHX1,FOXQ1,FOXE1,FOXF2,FOXF1,FOXL2,ZIC1,TBX1,FOXP4,FOXD2,FOXJ1,SIX1,FOXL1,FOXE3,FOXB1,FOXB2,SHH
SUZ12	positive regulation of transcription, DNA-dependent (GO:0045893)	47	367	19568	599	7.914e-18	2.62982e-14	TAL1,FOXA2,GATA3,TFAP2A,NR2F2,RORB,GDF6,NKX2-1,OTX2,LHX1,FZD1,PAX6,NEUROD1,FOXC1,WNT1,FOXE1,WNT3A,LHX2,FOXF2,FOXF1,FOXL2,SFRP1,TBX5,ZIC1,TBX1,LHX3,TP73,PAX3,GATA4,WT1,HOXA11,SIX1,SOX17,NKX2-5,HAND2,ALX1,PAX8,DLX5,HNF1B,EOMES,WNT7A,ZBTB16,FOXC2,GDF7,CDKN2A,POU3F3,SHH
SUZ12	KEGG_MATURITY_ONSET_DIABETES_OF_THE_YOUNG	12	25	19910	599	5.34649e-14	1.7761e-10	FOXA2,PAX6,NEUROD1,NKX2-2,MNX1,HHEX,ONECUT1,MAFA,HNF1B,PDX1,NEUROG3,NKX6-1
SUZ12	thyroid gland development (GO:0030878)	7	8	19927	599	6.34905e-13	2.10852e-09	NKX2-1,FOXE1,TBX1,SIX1,NKX2-5,PAX8,FOXE3
SUZ12	REACTOME_REGULATION_OF_BETA_CELL_DEVELOPMENT	12	30	19905	599	1.07226e-12	3.55992e-09	FOXA2,PAX6,NEUROD1,NKX2-2,ONECUT1,PTF1A,MAFA,HNF1B,PDX1,NEUROG3,NKX6-1,ONECUT3
SUZ12	regulation of sequence-specific DNA binding transcription factor activity (GO:0051090)	16	60	19875	599	1.23615e-12	4.10278e-09	FOXA2,FOXD3,FOXC1,FOXQ1,FOXE1,FOXF2,FOXG1,FOXF1,FOXL2,FOXP4,FOXD2,FOXL1,FOXE3,FOXC2,FOXB1,FOXB2
SUZ12	skeletal system development (GO:0001501)	19	95	19840	599	5.50239e-12	1.82569e-08	TBX3,DLX6,PITX1,EN1,NKX3-2,SHOX2,NPR3,COL12A1,COL2A1,IGF2,HOXA11,BMP8B,DLX5,WNT7A,PAX1,SHOX,HOXA13,PTHLH,COMP
SUZ12	dorsal/ventral pattern formation (GO:0009953)	8	13	19922	599	1.20852e-11	4.00867e-08	LHX1,FOXG1,LMX1B,DUSP6,HOXA11,WNT7A,HOXD11,SHH
SUZ12	endocrine pancreas development (GO:0031018)	11	29	19906	599	1.58039e-11	5.24056e-08	FOXA2,NEUROD1,NKX2-2,ONECUT1,PTF1A,HNF1B,WNT5B,PDX1,NEUROG3,NKX6-1,ONECUT3
SUZ12	inner ear morphogenesis (GO:0042472)	8	14	19921	599	3.29378e-11	1.09189e-07	TFAP2A,WNT1,WNT3A,FOXG1,ZIC1,TBX1,SIX1,PAX8
SUZ12	organ morphogenesis (GO:0009887)	14	56	19879	599	6.42799e-11	2.13023e-07	PAX5,FLI1,TBX3,ONECUT2,LHX1,PAX6,LHX3,PAX3,FOXL1,CDX2,SIX6,PDX1,NKX6-1,COMP
SUZ12	negative regulation of transcription from RNA polymerase II promoter (GO:0000122)	29	256	19679	599	2.09224e-10	6.93158e-07	TFAP2A,RUNX3,NR2F2,FOXD3,HAND1,NFIX,POU4F2,BHLHE41,FOXE1,PITX2,POU4F1,DMRT1,OSR1,GFI1,SOX14,GATA6,HIC1,TP73,TBX18,EFNA1,RARG,WT1,FOXJ1,NKX2-5,ALX1,NFIC,FOXC2,SKOR1,NKX6-1
SUZ12	brain development (GO:0007420)	16	81	19854	599	2.28175e-10	7.55714e-07	NKX2-1,TBR1,DLX2,FZD1,SIX3,FOXC1,NKX2-2,FOXG1,SFRP1,ZIC1,FZD10,ALX1,FOXL1,EOMES,FOXB1,FOXB2
SUZ12	positive regulation of neuron differentiation (GO:0045666)	8	18	19917	599	7.18118e-10	2.37769e-06	FOXA2,NEUROD1,ASCL1,NEUROD2,NEUROG1,NKX2-5,VWC2,ATOH1
SUZ12	endoderm formation (GO:0001706)	6	9	19926	599	7.2993e-10	2.41607e-06	LHX1,DUSP4,SOX17,SOX7,EOMES,TBX20
SUZ12	REACTOME_GPCR_LIGAND_BINDING	37	408	19527	599	7.36736e-10	2.43786e-06	GABBR2,FZD1,ADCYAP1,SSTR1,WNT1,PTGER4,WNT3A,ADRB1,ADRA1A,GRM7,FZD10,NTSR1,PTGDR,CHRM2,WNT10A,WNT7B,CXCL16,ADRB3,TAC1,IHH,WNT2,OXTR,WNT7A,GALR1,CALCA,WNT10B,GHSR,EDN3,AVPR1A,GNAS,GRP,NPBWR1,PTHLH,GALR2,TRH,GCGR,SHH
SUZ12	anterior/posterior pattern specification (GO:0009952)	9	24	19911	599	7.47129e-10	2.4715e-06	FOXA2,LHX1,HHEX,TBX1,WNT10A,WNT7B,WNT7A,WNT5B,CYP26C1
SUZ12	KEGG_HEDGEHOG_SIGNALING_PATHWAY	13	56	19879	599	7.6315e-10	2.52374e-06	LRP2,WNT1,WNT3A,WNT10A,WNT7B,BMP8A,BMP8B,IHH,WNT2,WNT7A,WNT5B,WNT10B,SHH
SUZ12	REACTOME_CLASS_B_2_SECRETIN_FAMILY_RECEPTORS	16	88	19847	599	8.96031e-10	2.96228e-06	FZD1,ADCYAP1,WNT1,WNT3A,FZD10,WNT10A,WNT7B,IHH,WNT2,WNT7A,CALCA,WNT10B,GNAS,PTHLH,GCGR,SHH
SUZ12	negative regulation of transcription, DNA-dependent (GO:0045892)	32	329	19606	599	1.54259e-09	5.09824e-06	GATA3,TFAP2A,NR2F2,HAND1,TBX3,LHX1,ESX1,HOXA7,FOXE1,ASCL1,HHEX,FOXG1,TBX2,FOXL2,GFI1,SOX14,SFRP1,GATA6,ATP8B1,MSX2,WT1,NKX2-5,SOX7,LHX9,PAX9,CALCA,ZBTB16,HMX1,CDKN2A,POU3F3,TBX20,FERD3L
SUZ12	ureteric bud development (GO:0001657)	7	15	19920	599	3.3893e-09	1.11982e-05	LHX1,FOXC1,SLIT2,OSR1,WT1,SIX1,FOXC2
SUZ12	heart looping (GO:0001947)	8	21	19914	599	4.00422e-09	1.3226e-05	HAND1,GATA4,FOXJ1,SOX17,NKX2-5,IHH,TBX20,SHH
SUZ12	negative regulation of epithelial to mesenchymal transition (GO:0010719)	6	11	19924	599	6.34802e-09	2.09612e-05	FOXA2,FOXA1,NKX2-1,SFRP1,TBX5,EFNA1
SUZ12	branching involved in ureteric bud morphogenesis (GO:0001658)	7	17	19918	599	1.21393e-08	4.00718e-05	FOXD3,WT1,HOXA11,SIX1,PAX8,HOXD11,SHH
SUZ12	heart development (GO:0007507)	12	59	19876	599	1.62755e-08	5.37092e-05	HAND1,FOXC1,OSR1,FOXF1,SHOX2,TBX5,TBX1,FOXP4,WT1,FOXL1,FOXC2,SHH
SUZ12	embryonic heart tube development (GO:0035050)	5	8	19927	599	1.90987e-08	6.30067e-05	HAND1,FOXC1,SOX17,NKX2-5,FOXC2
SUZ12	embryonic hindlimb morphogenesis (GO:0035116)	4	5	19930	599	2.40992e-08	7.94791e-05	AFF3,OSR1,RARG,WNT7A
SUZ12	metanephric epithelium development (GO:0072207)	4	5	19930	599	2.40992e-08	7.94791e-05	OSR1,WT1,WNT7B,PAX8
SUZ12	nervous system development (GO:0007399)	21	187	19748	599	5.09289e-08	0.000167862	LHX1,FGF5,DLX6,ERBB4,CRMP1,ROBO1,NEUROD2,SOX14,SHOX2,NEUROG1,PHOX2B,MAB21L2,NTF3,NR2E1,CHRM2,CNTFR,DLX5,GRIK1,NELL1,GBX2,NEUROG3
SUZ12	central nervous system development (GO:0007417)	13	76	19859	599	5.19634e-08	0.000171219	GPR124,NHLH2,PAX6,NPTX1,HPCAL4,SH3GL2,PAX8,GRIK1,IL1RAPL2,CYP26C1,ATOH1,POU3F3,SHH
SUZ12	anatomical structure morphogenesis (GO:0009653)	15	101	19834	599	5.43492e-08	0.000179026	GATA3,MAB21L1,LHX1,EYA4,MNX1,PITX1,EN1,PAX7,HOXA1,HOXA11,HOXB5,PAX8,HOXA4,LBX1,FGF3
SUZ12	cellular response to zinc ion (GO:0071294)	5	9	19926	599	5.58363e-08	0.000183869	MT1E,MT1M,MT1A,MT1G,MT1H
SUZ12	REACTOME_REGULATION_OF_GENE_EXPRESSION_IN_BETA_CELLS	7	20	19915	599	5.80728e-08	0.000191176	FOXA2,PAX6,NEUROD1,NKX2-2,MAFA,PDX1,NKX6-1
SUZ12	synaptic transmission (GO:0007268)	30	344	19591	599	5.92467e-08	0.000194981	RASGRF1,GABBR2,GRIK3,ADCY1,CAMK2B,NPTX1,KCNAB1,KCNN3,CACNA1E,CACNB4,KCNA1,NTSR1,GRIN1,GAD2,SLC6A3,KCNS2,KCNA4,SLC32A1,GAD1,GRIK1,KCNA2,ADCY8,SLC18A3,KCNK4,GRIN2C,NPBWR1,GALR2,CHAT,GJD2,SLC6A5
SUZ12	KEGG_BASAL_CELL_CARCINOMA	11	55	19880	599	6.54156e-08	0.000215217	FZD1,WNT1,WNT3A,FZD10,WNT10A,WNT7B,WNT2,WNT7A,WNT5B,WNT10B,SHH
SUZ12	positive regulation of sequence-specific DNA binding transcription factor activity (GO:0051091)	12	66	19869	599	6.78111e-08	0.000223031	FOXA1,NHLH2,FZD1,NEUROD1,WNT1,NKX2-2,NEUROD2,NEUROG1,NEUROG2,WNT2,NEUROG3,NKX6-1
SUZ12	PID_WNT_SIGNALING_PATHWAY	8	28	19907	599	7.79371e-08	0.000256257	FZD1,WNT1,WNT3A,FZD10,WNT7B,WNT2,WNT7A,RSPO1
SUZ12	KEGG_CALCIUM_SIGNALING_PATHWAY	20	178	19757	599	9.75051e-08	0.000320499	ADCY1,ERBB4,CACNA1D,CAMK2B,CACNA1E,PDGFRA,ADRB1,ADRA1A,NTSR1,CHRM2,GRIN1,CACNA1G,ADRB3,PDE1C,OXTR,ADCY8,AVPR1A,ITPKA,GRIN2C,GNAS
SUZ12	neuron differentiation (GO:0030182)	10	47	19888	599	1.07248e-07	0.000352416	FZD1,POU4F2,WNT3A,LMX1B,FZD10,WNT7B,WNT2,WNT5B,WNT10B,NTRK2
SUZ12	tissue development (GO:0009888)	7	22	19913	599	1.39774e-07	0.000459158	FOXF2,FOXG1,FOXF1,FOXP4,PTF1A,FOXB1,FOXB2
SUZ12	inner ear development (GO:0048839)	4	6	19929	599	1.41004e-07	0.000463056	NEUROD1,LHX3,HOXA1,SIX1
SUZ12	canonical Wnt receptor signaling pathway (GO:0060070)	10	49	19886	599	1.69888e-07	0.000557741	FZD1,WNT1,WNT3A,SFRP1,FZD10,RARG,WNT10A,HOXB9,WNT2,WNT7A
SUZ12	REACTOME_NEURONAL_SYSTEM	25	279	19656	599	3.63512e-07	0.00119305	RASGRF1,GABBR2,GRIK3,ADCY1,CAMK2B,KCNAB1,KCNN3,CACNB4,NEFL,KCNA1,GRIN1,GAD2,SLC6A3,KCNS2,KCNA4,SLC32A1,GAD1,GRIK1,KCNA2,ADCY8,SLC18A3,KCNK4,GRIN2C,CHAT,GJD2
SUZ12	embryo development (GO:0009790)	12	76	19859	599	3.84642e-07	0.00126201	FOXA1,FZD1,FOXQ1,FOXF2,FOXF1,SFRP1,FZD10,FOXD2,FOXL1,FOXB1,FOXB2,SHH
SUZ12	KEGG_MELANOGENESIS	14	102	19833	599	3.85215e-07	0.0012635	FZD1,ADCY1,CAMK2B,WNT1,WNT3A,FZD10,WNT10A,WNT7B,WNT2,WNT7A,WNT5B,ADCY8,WNT10B,GNAS
SUZ12	positive regulation of gastrulation (GO:2000543)	4	7	19928	599	4.81264e-07	0.00157807	FOXA2,OTX2,LHX1,OSR1
SUZ12	cellular response to retinoic acid (GO:0071300)	8	34	19901	599	5.03743e-07	0.00165127	WNT3A,TBX1,FZD10,WNT7B,WNT2,LTK,WNT5B,WNT10B
SUZ12	multicellular organismal development (GO:0007275)	16	133	19802	599	5.14455e-07	0.00168587	PAX5,HLF,EN2,LEPR,ERG,HOXD13,HOXA9,HLX,HOXB2,IGF2,HOXA1,HOXA11,MEOX2,ALX1,EDN3,GALR2
SUZ12	axis specification (GO:0009798)	5	12	19923	599	5.68483e-07	0.00186235	WNT1,WNT3A,WNT10A,WNT7B,WNT10B
SUZ12	negative regulation of neuron apoptotic process (GO:0043524)	8	35	19900	599	6.60156e-07	0.00216201	POU4F1,TP73,SIX1,AGAP2,CITED1,CRLF1,NTRK2,FOXB1
SUZ12	hair follicle morphogenesis (GO:0031069)	4	8	19927	599	1.25154e-06	0.00409754	FOXQ1,FOXE1,WNT10A,FOXE3
SUZ12	midbrain development (GO:0030901)	4	8	19927	599	1.25154e-06	0.00409754	OTX2,WNT1,FOXB1,SHH
SUZ12	outflow tract septum morphogenesis (GO:0003148)	4	8	19927	599	1.25154e-06	0.00409754	GATA6,TBX1,NKX2-5,TBX20
SUZ12	somitogenesis (GO:0001756)	4	8	19927	599	1.25154e-06	0.00409754	FOXC1,WNT3A,FOXC2,FOXB1
SUZ12	transcription from RNA polymerase II promoter (GO:0006366)	25	298	19637	599	1.27966e-06	0.00418448	GATA3,TFAP2A,PAX5,RUNX3,HAND1,HLF,NFIX,LHX1,PAX6,EPAS1,NKX3-2,NKX2-8,GATA6,HOXD13,PAX3,GATA4,ALX1,FEV,CDX2,NFIC,PAX1,SHOX,FOXE3,PDX1,ATOH1
SUZ12	negative regulation of growth (GO:0045926)	5	14	19921	599	1.75483e-06	0.00573655	MT1E,MT1M,MT1A,MT1G,MT1H
SUZ12	positive regulation of cell proliferation (GO:0008284)	22	249	19686	599	1.98882e-06	0.00649947	TBX3,FGF5,ERBB4,FGF9,WNT1,WNT3A,TBX2,SFRP1,POU3F2,TBX1,IGF2,NKX2-5,GREM1,BNC1,HOXC10,EGR4,WNT2,CRLF1,NTRK2,POU3F3,SHH,FGF3
SUZ12	WNT_SIGNALING	12	89	19846	599	2.47772e-06	0.00809472	FZD1,WNT1,WNT3A,PITX2,SFRP1,WNT10A,SOX17,WNT7B,WNT2,WNT7A,WNT5B,T
SUZ12	KEGG_NEUROACTIVE_LIGAND_RECEPTOR_INTERACTION	23	272	19663	599	2.68197e-06	0.0087593	GABBR2,GRIK3,LEPR,SSTR1,PTGER4,ADRB1,ADRA1A,GRID1,GRM7,NTSR1,PTGDR,CHRM2,GRIN1,ADRB3,GRIK1,OXTR,GALR1,GHSR,AVPR1A,GRIN2C,NPBWR1,GALR2,GCGR
SUZ12	cellular response to cadmium ion (GO:0071276)	4	9	19926	599	2.74617e-06	0.00896624	MT1E,MT1A,MT1G,MT1H
SUZ12	embryonic pattern specification (GO:0009880)	4	9	19926	599	2.74617e-06	0.00896624	LHX1,WNT1,WNT3A,SHH
SUZ12	negative regulation of transcription by competitive promoter binding (GO:0010944)	4	9	19926	599	2.74617e-06	0.00896624	TFAP2A,BHLHE41,HHEX,OVOL2
SUZ12	Wnt receptor signaling pathway, calcium modulating pathway (GO:0007223)	4	9	19926	599	2.74617e-06	0.00896624	FZD1,WNT1,WNT3A,WNT5B
SUZ12	odontogenesis (GO:0042476)	5	15	19920	599	2.85043e-06	0.00929526	PITX2,OSR1,WNT10A,AQP5,WNT7B
SUZ12	kidney development (GO:0001822)	8	42	19893	599	3.45551e-06	0.011265	GATA3,TFAP2A,FOXD3,LHX1,WT1,SIX1,PAX8,HNF1B
SUZ12	cell-cell signaling (GO:0007267)	20	221	19714	599	3.52778e-06	0.011497	PGR,LHX1,FGF5,FZD1,ADCYAP1,SSTR1,WNT1,EFNA3,ADRA1A,TBX5,EFNA1,NTF3,TAC1,WNT2,CALCA,EDN3,PTHLH,TRH,SHH,FGF3
SUZ12	aortic valve morphogenesis (GO:0003180)	3	5	19930	599	3.93991e-06	0.0128362	GATA3,EFNA1,TBX20
SUZ12	atrial septum morphogenesis (GO:0060413)	3	5	19930	599	3.93991e-06	0.0128362	GATA4,NKX2-5,TBX20
SUZ12	axon midline choice point recognition (GO:0016199)	3	5	19930	599	3.93991e-06	0.0128362	ROBO1,FOXG1,ROBO3
SUZ12	cardiac right ventricle morphogenesis (GO:0003215)	3	5	19930	599	3.93991e-06	0.0128362	GATA3,GATA4,TBX20
SUZ12	embryonic forelimb morphogenesis (GO:0035115)	3	5	19930	599	3.93991e-06	0.0128362	TFAP2A,OSR1,WNT7A
SUZ12	embryonic organ morphogenesis (GO:0048562)	3	5	19930	599	3.93991e-06	0.0128362	NEUROD1,FOXE1,FOXE3
SUZ12	insulin secretion (GO:0030073)	3	5	19930	599	3.93991e-06	0.0128362	NEUROD1,MAFA,PDX1
SUZ12	iris morphogenesis (GO:0061072)	3	5	19930	599	3.93991e-06	0.0128362	PAX6,PITX2,WNT2
SUZ12	positive regulation of embryonic development (GO:0040019)	3	5	19930	599	3.93991e-06	0.0128362	FOXA2,OTX2,LHX1
SUZ12	pronephros development (GO:0048793)	3	5	19930	599	3.93991e-06	0.0128362	OSR1,PAX8,HNF1B
SUZ12	epithelial cell differentiation (GO:0030855)	5	16	19919	599	4.44491e-06	0.0144371	FZD1,TBX1,WT1,FOXJ1,SIX1
SUZ12	REACTOME_POST_NMDA_RECEPTOR_ACTIVATION_EVENTS	7	33	19902	599	4.53141e-06	0.0147135	RASGRF1,ADCY1,CAMK2B,NEFL,GRIN1,ADCY8,GRIN2C
SUZ12	embryonic digit morphogenesis (GO:0042733)	4	10	19925	599	5.3563e-06	0.0173866	TBX3,OSR1,WNT7A,SHH
SUZ12	thymus development (GO:0048538)	4	10	19925	599	5.3563e-06	0.0173866	FOXE1,TBX1,SIX1,SHH
SUZ12	REACTOME_RAS_ACTIVATION_UOPN_CA2_INFUX_THROUGH_NMDA_RECEPTOR	5	17	19918	599	6.6951e-06	0.0217189	RASGRF1,CAMK2B,NEFL,GRIN1,GRIN2C
SUZ12	activation of adenylate cyclase activity (GO:0007190)	6	26	19909	599	8.53874e-06	0.0276911	ADCYAP1,ADRB1,ADRB3,CALCA,NTRK2,GNAS
SUZ12	forebrain development (GO:0030900)	4	11	19924	599	9.57684e-06	0.0310481	NKX2-1,OTX2,VAX2,SHH
SUZ12	REACTOME_ACTIVATION_OF_NMDA_RECEPTOR_UPON_GLUTAMATE_BINDING_AND_POSTSYNAPTIC_EVENTS	7	37	19898	599	1.13337e-05	0.0367325	RASGRF1,ADCY1,CAMK2B,NEFL,GRIN1,ADCY8,GRIN2C
SUZ12	embryonic cranial skeleton morphogenesis (GO:0048701)	3	6	19929	599	1.15377e-05	0.0373822	TFAP2A,TBX1,SIX1
SUZ12	male genitalia development (GO:0030539)	3	6	19929	599	1.15377e-05	0.0373822	TBX3,WT1,SHH
SUZ12	mesenchymal to epithelial transition (GO:0060231)	3	6	19929	599	1.15377e-05	0.0373822	GATA3,WT1,CITED1
SUZ12	metanephric mesenchyme development (GO:0072075)	3	6	19929	599	1.15377e-05	0.0373822	OSR1,WT1,SIX1
SUZ12	positive regulation of transcription regulatory region DNA binding (GO:2000679)	3	6	19929	599	1.15377e-05	0.0373822	GATA3,NEUROD1,HAND2
SUZ12	renal system development (GO:0072001)	3	6	19929	599	1.15377e-05	0.0373822	FOXF1,SOX17,SHH
SUZ12	urogenital system development (GO:0001655)	3	6	19929	599	1.15377e-05	0.0373822	LHX1,OSR1,PAX8
SUZ12	REACTOME_TRANSMISSION_ACROSS_CHEMICAL_SYNAPSES	17	186	19749	599	1.35188e-05	0.0437064	RASGRF1,GABBR2,GRIK3,ADCY1,CAMK2B,CACNB4,NEFL,GRIN1,GAD2,SLC6A3,SLC32A1,GAD1,GRIK1,ADCY8,SLC18A3,GRIN2C,CHAT
SUZ12	positive regulation of apoptotic process (GO:0043065)	13	119	19816	599	1.36683e-05	0.044176	BCL2L11,IGFBP3,NEUROD1,SLIT2,FOXL2,SFRP1,MSX1,DUSP6,HOXA5,RARG,SCIN,WNT10B,HRK
SUZ12	lung development (GO:0030324)	5	19	19916	599	1.39429e-05	0.0450495	NKX2-1,FOXF1,FOXJ1,WNT7B,SHH
SUZ12	artery morphogenesis (GO:0048844)	4	12	19923	599	1.60114e-05	0.0517168	FOXC1,TBX1,HOXA1,FOXC2
SUZ12	cell migration involved in sprouting angiogenesis (GO:0002042)	4	12	19923	599	1.60114e-05	0.0517168	EGR3,SLIT2,ROBO1,GREM1
SUZ12	metanephros development (GO:0001656)	4	12	19923	599	1.60114e-05	0.0517168	FOXC1,CITED1,FOXC2,SHH
SUZ12	positive regulation of axonogenesis (GO:0050772)	4	12	19923	599	1.60114e-05	0.0517168	SLIT2,ROBO1,NGFR,NTRK2
SUZ12	REACTOME_G_ALPHA_S_SIGNALLING_EVENTS	13	121	19814	599	1.65623e-05	0.0534301	PDE10A,ADCY1,ADCYAP1,PTGER4,ADRB1,PDE4B,PTGDR,ADRB3,ADCY8,CALCA,GNAS,PTHLH,GCGR
SUZ12	negative regulation of neurogenesis (GO:0050768)	3	7	19928	599	2.62797e-05	0.084752	PAX6,WNT3A,WNT7A
SUZ12	pharyngeal system development (GO:0060037)	3	7	19928	599	2.62797e-05	0.084752	GATA3,TBX1,NKX2-5
SUZ12	ventricular septum development (GO:0003281)	3	7	19928	599	2.62797e-05	0.084752	GATA3,TBX5,GATA4
ZBTB33	REACTOME_RNA_POL_I_PROMOTER_OPENING	41	62	19873	1797	1.25207e-29	4.16437e-26	H3F3B,HIST2H2BE,HIST1H3B,HIST1H2BD,HIST1H2BJ,HIST1H2AE,HIST1H2AD,HIST1H2AJ,HIST1H2AB,HIST1H3H,HIST1H2BB,HIST1H2BG,HIST1H2BF,HIST1H2BO,HIST1H2BM,HIST1H2BN,HIST1H3G,HIST1H3J,HIST1H3F,HIST2H2AC,HIST1H2AC,HIST1H3C,HIST1H2BC,HIST1H2BL,HIST3H2BB,HIST1H3D,HIST1H3A,UBTF,HIST1H4H,HIST1H4J,HIST1H4K,HIST4H4,HIST1H4I,HIST1H4E,HIST1H4A,HIST1H4C,HIST1H4B,HIST1H4D,HIST1H2BH,HIST1H2BI,HIST1H2BK
ZBTB33	REACTOME_RNA_POL_I_TRANSCRIPTION	47	89	19846	1797	3.8124e-27	1.26762e-23	CBX3,H3F3B,HIST2H2BE,HIST1H3B,HIST1H2BD,HIST1H2BJ,HIST1H2AE,HIST1H2AD,HIST1H2AJ,HIST1H2AB,HIST1H3H,HIST1H2BB,HIST1H2BG,HIST1H2BF,HIST1H2BO,HIST1H2BM,HIST1H2BN,HIST1H3G,HIST1H3J,HIST1H3F,HIST2H2AC,HIST1H2AC,HIST1H3C,HIST1H2BC,HIST1H2BL,HIST3H2BB,HIST1H3D,HIST1H3A,PTRF,UBTF,POLR1C,HIST1H4H,HIST1H4J,HIST1H4K,HIST4H4,HIST1H4I,HIST1H4E,HIST1H4A,HIST1H4C,POLR1B,CCNH,HIST1H4B,HIST1H4D,HIST1H2BH,HIST1H2B…
ZBTB33	REACTOME_MEIOTIC_RECOMBINATION	46	86	19849	1797	5.99286e-27	1.99203e-23	H3F3B,RAD51,HIST2H2BE,HIST1H3B,HIST1H2BD,HIST1H2BJ,HIST1H2AE,HIST1H2AD,HIST1H2AJ,HIST1H2AB,HIST1H3H,HIST1H2BB,HIST1H2BG,HIST1H2BF,HIST1H2BO,HIST1H2BM,HIST1H2BN,HIST1H3G,HIST1H3J,HIST1H3F,HIST2H2AC,HIST1H2AC,HIST1H3C,HIST1H2BC,HIST1H2BL,HIST3H2BB,HIST1H3D,HIST1H3A,RPA2,MRE11A,MSH4,HIST1H4H,HIST1H4J,HIST1H4K,HIST4H4,HIST1H4I,HIST1H4E,HIST1H4A,HIST1H4C,HIST1H4B,HIST1H4D,HIST1H2BH,HIST1H2BI,MSH5,HIST…
ZBTB33	REACTOME_TRANSCRIPTION	74	210	19725	1797	8.79906e-27	2.92393e-23	RDBP,CBX3,H3F3B,CTDP1,SUPT16H,SRSF7,SRSF2,HIST2H2BE,POLR2B,SNAPC3,HIST1H3B,SRSF5,HIST1H2BD,HIST1H2BJ,HIST1H2AE,HIST1H2AD,HIST1H2AJ,HIST1H2AB,HIST1H3H,HIST1H2BB,HIST1H2BG,HIST1H2BF,HIST1H2BO,HIST1H2BM,HIST1H2BN,HIST1H3G,HIST1H3J,HIST1H3F,HIST2H2AC,HIST1H2AC,HIST1H3C,HIST1H2BC,HIST1H2BL,HIST3H2BB,HIST1H3D,HIST1H3A,GTF3C2,PTRF,RBM8A,POLR2A,LSM10,UBTF,SNRPG,UPF3B,SRSF4,POLR1C,SUPT5H,HIST1H4H,HIST1H4J…
ZBTB33	REACTOME_RNA_POL_I_RNA_POL_III_AND_MITOCHONDRIAL_TRANSCRIPTION	55	122	19813	1797	9.11967e-27	3.02955e-23	CBX3,H3F3B,HIST2H2BE,SNAPC3,HIST1H3B,HIST1H2BD,HIST1H2BJ,HIST1H2AE,HIST1H2AD,HIST1H2AJ,HIST1H2AB,HIST1H3H,HIST1H2BB,HIST1H2BG,HIST1H2BF,HIST1H2BO,HIST1H2BM,HIST1H2BN,HIST1H3G,HIST1H3J,HIST1H3F,HIST2H2AC,HIST1H2AC,HIST1H3C,HIST1H2BC,HIST1H2BL,HIST3H2BB,HIST1H3D,HIST1H3A,GTF3C2,PTRF,UBTF,POLR1C,HIST1H4H,HIST1H4J,HIST1H4K,HIST4H4,HIST1H4I,HIST1H4E,HIST1H4A,HIST1H4C,POLR1B,POLR3H,CCNH,HIST1H4B,HIST1H…
ZBTB33	REACTOME_MEIOSIS	52	116	19819	1797	2.77466e-25	9.21464e-22	H3F3B,RAD51,STAG1,HIST2H2BE,SMC1A,HIST1H3B,HIST1H2BD,HIST1H2BJ,HIST1H2AE,HIST1H2AD,HIST1H2AJ,HIST1H2AB,HIST1H3H,HIST1H2BB,HIST1H2BG,HIST1H2BF,HIST1H2BO,HIST1H2BM,HIST1H2BN,HIST1H3G,HIST1H3J,HIST1H3F,HIST2H2AC,HIST1H2AC,HIST1H3C,HIST1H2BC,HIST1H2BL,HIST3H2BB,HIST1H3D,HIST1H3A,RPA2,MRE11A,MSH4,HIST1H4H,HIST1H4J,HIST1H4K,HIST4H4,HIST1H4I,HIST1H4E,HIST1H4A,HIST1H4C,STAG3,SMC1B,HIST1H4B,HIST1H4D,HIST1…
ZBTB33	REACTOME_PACKAGING_OF_TELOMERE_ENDS	31	48	19887	1797	1.50162e-22	4.98537e-19	HIST2H2BE,HIST1H2BD,HIST1H2BJ,HIST1H2AE,HIST1H2AD,HIST1H2AJ,HIST1H2AB,HIST1H2BB,HIST1H2BG,HIST1H2BF,HIST1H2BO,HIST1H2BM,HIST1H2BN,HIST2H2AC,HIST1H2AC,HIST1H2BC,HIST1H2BL,HIST3H2BB,HIST1H4H,HIST1H4J,HIST1H4K,HIST4H4,HIST1H4I,HIST1H4E,HIST1H4A,HIST1H4C,HIST1H4B,HIST1H4D,HIST1H2BH,HIST1H2BI,HIST1H2BK
ZBTB33	REACTOME_AMYLOIDS	41	83	19852	1797	1.72125e-22	5.71284e-19	H3F3B,HIST2H2BE,HIST1H3B,HIST1H2BD,HIST1H2BJ,HIST1H2AE,HIST1H2AD,HIST1H2AJ,HIST1H2AB,HIST1H3H,HIST1H2BB,HIST1H2BG,HIST1H2BF,HIST1H2BO,HIST1H2BM,HIST1H2BN,HIST1H3G,HIST1H3J,HIST1H3F,HIST2H2AC,HIST1H2AC,HIST1H3C,HIST1H2BC,HIST1H2BL,HIST3H2BB,HIST1H3D,HIST1H3A,B2M,HIST1H4H,HIST1H4J,HIST1H4K,HIST4H4,HIST1H4I,HIST1H4E,HIST1H4A,HIST1H4C,HIST1H4B,HIST1H4D,HIST1H2BH,HIST1H2BI,HIST1H2BK
ZBTB33	REACTOME_DEPOSITION_OF_NEW_CENPA_CONTAINING_NUCLEOSOMES_AT_THE_CENTROMERE	35	64	19871	1797	1.5567e-21	5.16511e-18	RBBP4,SMARCA5,HIST2H2BE,HIST1H2BD,HIST1H2BJ,HIST1H2AE,HIST1H2AD,HIST1H2AJ,HIST1H2AB,HIST1H2BB,HIST1H2BG,HIST1H2BF,HIST1H2BO,HIST1H2BM,HIST1H2BN,HIST2H2AC,HIST1H2AC,HIST1H2BC,HIST1H2BL,HIST3H2BB,RBBP7,HIST1H4H,HIST1H4J,HIST1H4K,HIST4H4,HIST1H4I,HIST1H4E,HIST1H4A,HIST1H4C,NPM1,HIST1H4B,HIST1H4D,HIST1H2BH,HIST1H2BI,HIST1H2BK
ZBTB33	REACTOME_MEIOTIC_SYNAPSIS	37	73	19862	1797	4.79096e-21	1.58916e-17	STAG1,HIST2H2BE,SMC1A,HIST1H2BD,HIST1H2BJ,HIST1H2AE,HIST1H2AD,HIST1H2AJ,HIST1H2AB,HIST1H2BB,HIST1H2BG,HIST1H2BF,HIST1H2BO,HIST1H2BM,HIST1H2BN,HIST2H2AC,HIST1H2AC,HIST1H2BC,HIST1H2BL,HIST3H2BB,HIST1H4H,HIST1H4J,HIST1H4K,HIST4H4,HIST1H4I,HIST1H4E,HIST1H4A,HIST1H4C,STAG3,SMC1B,HIST1H4B,HIST1H4D,HIST1H2BH,HIST1H2BI,DIDO1,HIST1H2BK,ATR
ZBTB33	REACTOME_TELOMERE_MAINTENANCE	37	75	19860	1797	1.66735e-20	5.52892e-17	HIST2H2BE,RFC5,HIST1H2BD,HIST1H2BJ,HIST1H2AE,HIST1H2AD,HIST1H2AJ,HIST1H2AB,HIST1H2BB,HIST1H2BG,HIST1H2BF,HIST1H2BO,HIST1H2BM,HIST1H2BN,HIST2H2AC,HIST1H2AC,HIST1H2BC,HIST1H2BL,HIST3H2BB,RPA2,NHP2,HIST1H4H,HIST1H4J,HIST1H4K,HIST4H4,HIST1H4I,HIST1H4E,HIST1H4A,HIST1H4C,RFC3,HIST1H4B,HIST1H4D,HIST1H2BH,HIST1H2BI,POLA2,WRAP53,HIST1H2BK
ZBTB33	REACTOME_CELL_CYCLE	99	421	19514	1797	7.19095e-20	2.3838e-16	TAOK1,PSMB2,RBBP4,NUMA1,CEP57,CKS1B,TFDP1,CLASP1,SMARCA5,STAG1,AHCTF1,MDM2,CDK6,PCM1,PSMD5,ANAPC1,HIST2H2BE,SMC1A,ZWILCH,NUP43,CENPC1,RFC5,PPP1CC,TK2,HIST1H2BD,HIST1H2BJ,HIST1H2AE,HIST1H2AD,HIST1H2AJ,HIST1H2AB,HIST1H2BB,HIST1H2BG,HIST1H2BF,HIST1H2BO,HIST1H2BM,HIST1H2BN,HIST2H2AC,HIST1H2AC,HIST1H2BC,HIST1H2BL,HIST3H2BB,RBL2,RPA2,TP53,RAD1,CDC7,GINS4,PSMD2,DCTN2,OFD1,CDC26,TUBGCP5,PSMD9,RBBP7,ANAPC…
ZBTB33	REACTOME_CHROMOSOME_MAINTENANCE	47	122	19813	1797	1.17861e-19	3.90591e-16	RBBP4,SMARCA5,STAG1,HIST2H2BE,SMC1A,RFC5,HIST1H2BD,HIST1H2BJ,HIST1H2AE,HIST1H2AD,HIST1H2AJ,HIST1H2AB,HIST1H2BB,HIST1H2BG,HIST1H2BF,HIST1H2BO,HIST1H2BM,HIST1H2BN,HIST2H2AC,HIST1H2AC,HIST1H2BC,HIST1H2BL,HIST3H2BB,RPA2,RBBP7,NHP2,HIST1H4H,HIST1H4J,HIST1H4K,HIST4H4,HIST1H4I,HIST1H4E,HIST1H4A,HIST1H4C,NPM1,RFC3,STAG3,SMC1B,HIST1H4B,HIST1H4D,HIST1H2BH,HIST1H2BI,POLA2,WRAP53,DIDO1,HIST1H2BK,ATR
ZBTB33	KEGG_SYSTEMIC_LUPUS_ERYTHEMATOSUS	48	140	19795	1797	1.52514e-17	5.0528e-14	H3F3B,HIST2H2BE,HIST1H3B,HIST1H2BD,HIST1H2BJ,HIST1H2AE,HIST1H2AD,HIST1H2AJ,HIST1H2AG,HIST1H2AH,HIST1H2AB,HIST1H2AI,HIST2H2AB,HIST1H3H,HIST1H2BB,HIST1H2BG,HIST1H2BF,HIST1H2BO,HIST1H2AM,HIST1H2BM,HIST1H2AL,HIST1H2BN,HIST1H3G,HIST1H3J,HIST1H3F,HIST2H2AC,HIST1H2AC,HIST1H3C,HIST1H2BC,HIST1H2BL,HIST3H2BB,HIST1H3D,HIST1H3A,HIST3H2A,HIST1H4H,HIST1H4J,HIST1H4K,HIST4H4,HIST1H4I,HIST1H4E,HIST1H4A,HIST1H4C,H…
ZBTB33	gene expression (GO:0010467)	130	716	19219	1797	1.92808e-15	6.38579e-12	CTDP1,PPARD,HNRNPD,HNRNPC,PCBP1,MED1,PSMB2,SUPT16H,RBPJ,SRSF7,ADARB1,ETF1,SSR1,TNPO1,XRN1,PAN3,HNRNPA2B1,PCBP2,DIS3,RPL37,EIF4A1,HNRNPK,DARS,RXRB,SF3A1,HNRNPA0,PSMD5,PAIP1,SRSF2,EIF5,SMC1A,MAPKAPK2,POLR3G,LARS,POLR2B,DDX20,PABPC1,SNAPC3,SRSF5,EIF4A2,GTF3C2,FUS,SMG7,WARS2,PTRF,RPL15,RBM8A,POLR2A,LSM10,MED17,HSPA8,UBC,UBTF,SNRPG,SNRNP70,RPL23A,PSMD2,RPL27A,DDX23,MAPK14,UPF3B,NRBF2,EIF5B,WDR77,PSMD9…
ZBTB33	KEGG_RIBOSOME	33	88	19847	1797	4.67752e-14	1.54873e-10	RPL37,RPL15,RPL23A,RPL27A,RPL4,RPS3A,RPL41,RPL10,RPL23,RPL7A,RPS19,RPL7,RPL26,RPL10A,RPL38,RPL36,RPS15,RPS20,RSL24D1,RPS28,RPS11,RPLP1,RPS6,RPL13,RPS12,RPL3,RPS2,RPS15A,RPS9,RPS7,RPL24,RPL12,RPL17
ZBTB33	nuclear-transcribed mRNA catabolic process, nonsense-mediated decay (GO:0000184)	40	128	19807	1797	2.02124e-13	6.69032e-10	ETF1,RPL37,GSPT1,PABPC1,SMG7,RPL15,RBM8A,RPL23A,RPL27A,SMG5,RPL4,EIF4A3,RPS3A,RPL41,RPL10,RPL23,RPL7A,RPS19,RPL7,RPL26,RPL10A,RPL38,RPL36,RPS15,RPS20,RPS28,RPS11,RPLP1,RPS6,RPL13,RPS12,RPL3,RPS2,RPS15A,RPS9,RPS7,RPL24,RPL12,RPL17,EXOSC10
ZBTB33	nuclear mRNA splicing, via spliceosome (GO:0000398)	47	177	19758	1797	1.95891e-12	6.48204e-09	HNRNPD,HNRNPC,PCBP1,SRSF7,HNRNPA2B1,PCBP2,SRSF10,HNRNPK,SF1,SF3A1,HNRNPA0,SLU7,PNN,SRSF2,SMC1A,POLR2B,PABPC1,SRSF5,FUS,RBM8A,POLR2A,SNRPG,SNRNP70,DGCR14,DDX23,UPF3B,PPIL3,PRPF19,SRSF4,CLP1,SNRPA,EIF4A3,CPSF3,LSM3,DDX41,PRPF4,BUD13,PHF5A,FRG1,PRPF31,SNRPC,TRA2A,POLR2L,TFIP11,SUGP1,POLR2E,CDC5L
ZBTB33	translational termination (GO:0006415)	33	100	19835	1797	3.39942e-12	1.12453e-08	ETF1,RPL37,RPL15,RPL23A,RPL27A,RPL4,RPS3A,RPL41,RPL10,RPL23,RPL7A,RPS19,RPL7,RPL26,RPL10A,RPL38,RPL36,RPS15,RPS20,RPS28,RPS11,RPLP1,RPS6,RPL13,RPS12,RPL3,RPS2,RPS15A,RPS9,RPS7,RPL24,RPL12,RPL17
ZBTB33	SRP-dependent cotranslational protein targeting to membrane (GO:0006614)	36	119	19816	1797	8.16044e-12	2.69866e-08	SSR1,RPL37,RPL15,RPL23A,RPL27A,SSR2,SRP19,RPL4,RPS3A,RPL41,RPL10,RPL23,RPL7A,RPS19,RPL7,RPL26,RPL10A,RPL38,RPL36,RPS15,RPS20,RPS28,RPS11,RPLP1,RPS6,RPL13,RPS12,RPL3,RPS2,RPS15A,RPS9,RPS7,RPL24,SSR4,RPL12,RPL17
ZBTB33	viral transcription (GO:0019083)	32	98	19837	1797	9.53995e-12	3.15391e-08	RPL37,RPL15,RPL23A,RPL27A,RPL4,RPS3A,RPL41,RPL10,RPL23,RPL7A,RPS19,RPL7,RPL26,RPL10A,RPL38,RPL36,RPS15,RPS20,RPS28,RPS11,RPLP1,RPS6,RPL13,RPS12,RPL3,RPS2,RPS15A,RPS9,RPS7,RPL24,RPL12,RPL17
ZBTB33	mRNA metabolic process (GO:0016071)	60	274	19661	1797	2.34483e-11	7.74968e-08	HNRNPD,PSMB2,ETF1,TNPO1,XRN1,PAN3,DIS3,RPL37,EIF4A1,PSMD5,PAIP1,MAPKAPK2,PABPC1,EIF4A2,SMG7,RPL15,RBM8A,HSPA8,UBC,RPL23A,PSMD2,RPL27A,MAPK14,UPF3B,PSMD9,SMG5,EXOSC3,RPL4,EIF4A3,RPS3A,LSM3,RPL41,PSMD10,RPL10,RPL23,RPL7A,RPS19,RPL7,RPL26,RPL10A,RPL38,RPL36,RPS15,RPS20,RPS28,RPS11,RPLP1,RPS6,RPL13,RPS12,RPL3,RPS2,RPS15A,RPS9,RPS7,RPL24,RPL12,NUP214,RQCD1,RPL17
ZBTB33	viral infectious cycle (GO:0019058)	33	107	19828	1797	2.90361e-11	9.59353e-08	RPL37,RPL15,RPL23A,RPL27A,RPL4,RPS3A,RPL41,RPL10,RPL23,RPL7A,RPS19,RPL7,RPL26,RPL10A,RPL38,RPL36,RPS15,RPS20,RPS28,RPS11,RPLP1,RPS6,RPL13,RPS12,RPL3,RPS2,RPS15A,RPS9,RPS7,RPL24,RPL12,EIF2AK2,RPL17
ZBTB33	RNA metabolic process (GO:0016070)	63	298	19637	1797	3.92161e-11	1.29531e-07	HNRNPD,PSMB2,ETF1,TNPO1,XRN1,PAN3,XRN2,DIS3,RPL37,EIF4A1,PSMD5,MAPKAPK2,DDX20,PABPC1,EIF4A2,SMG7,RPL15,RBM8A,HSPA8,UBC,SNRPG,RPL23A,PSMD2,RPL27A,MAPK14,UPF3B,WDR77,PSMD9,SMG5,EXOSC3,RPL4,EIF4A3,RPS3A,LSM3,RPL41,PSMD10,RPL10,RPL23,RPL7A,RPS19,RPL7,RPL26,RPL10A,RPL38,RPL36,RPS15,RPS20,RPS28,RPS11,RPLP1,RPS6,RPL13,RPS12,RPL3,RPS2,RPS15A,RPS9,RPS7,RPL24,RPL12,NUP214,RQCD1,RPL17
ZBTB33	translational initiation (GO:0006413)	38	139	19796	1797	7.46685e-11	2.46555e-07	RPL37,EIF4A1,PAIP1,PABPC1,EIF4A2,RPL15,RPL23A,RPL27A,RPL4,RPS3A,RPL41,RPL10,RPL23,RPL7A,RPS19,RPL7,RPL26,RPL10A,RPL38,EIF2B4,RPL36,RPS15,RPS20,RPS28,RPS11,RPLP1,RPS6,RPL13,RPS12,RPL3,RPS2,RPS15A,RPS9,RPS7,RPL24,RPL12,RPL17,EIF3L
ZBTB33	translational elongation (GO:0006414)	32	105	19830	1797	7.87051e-11	2.59806e-07	RPL37,RPL15,RPL23A,RPL27A,RPL4,RPS3A,RPL41,RPL10,RPL23,RPL7A,RPS19,RPL7,RPL26,RPL10A,RPL38,RPL36,RPS15,RPS20,RPS28,RPS11,RPLP1,RPS6,RPL13,RPS12,RPL3,RPS2,RPS15A,RPS9,RPS7,RPL24,RPL12,RPL17
ZBTB33	KEGG_SPLICEOSOME	36	128	19807	1797	8.84584e-11	2.91913e-07	HNRNPC,PCBP1,SRSF7,U2SURP,NAA38,SRSF10,DDX42,HNRNPK,SF3A1,SMNDC1,SLU7,SRSF2,TCERG1,CHERP,SRSF5,MAGOHB,RBM8A,HSPA8,SNRPG,SNRNP70,PRPF40B,DDX23,DHX16,PRPF19,SRSF4,PUF60,SNRPA,EIF4A3,LSM3,PRPF4,PHF5A,PRPF31,SNRPC,TRA2A,CDC5L,USP39
ZBTB33	REACTOME_METABOLISM_OF_MRNA	58	284	19651	1797	8.82381e-10	2.91098e-06	HNRNPD,PSMB2,ETF1,TNPO1,XRN1,DIS3,RPL37,EIF4A1,PSMD5,PAIP1,MAPKAPK2,PABPC1,EIF4A2,SMG7,RPL15,RBM8A,HSPA8,RPL23A,PSMD2,RPL27A,MAPK14,UPF3B,PSMD9,SMG5,EXOSC3,RPL4,EIF4A3,RPS3A,LSM3,RPL41,PSMD10,RPL10,RPL23,RPL7A,RPS19,RPL7,RPL26,RPL10A,RPL38,RPL36,RPS15,RPS20,RPS28,RPS11,RPLP1,RPS6,RPL13,RPS12,RPL3,RPS2,RPS15A,RPS9,RPS7,RPL24,RPL12,NUP214,RQCD1,RPL17
ZBTB33	REACTOME_METABOLISM_OF_RNA	64	330	19605	1797	1.25767e-09	4.1478e-06	HNRNPD,PSMB2,ETF1,TNPO1,XRN1,DIS3,RPL37,EIF4A1,PSMD5,PAIP1,MAPKAPK2,NUP43,DDX20,PABPC1,EIF4A2,SMG7,RPL15,RBM8A,HSPA8,SNRPG,RPL23A,PSMD2,RPL27A,MAPK14,UPF3B,WDR77,PSMD9,SMG5,EXOSC3,NUP133,RPL4,EIF4A3,RPS3A,LSM3,RPL41,PSMD10,RPL10,RPL23,RPL7A,RPS19,RPL7,RPL26,RPL10A,RPL38,RPL36,RPS15,RPS20,RPS28,RPS11,RPLP1,RPS6,RPL13,RPS12,RPL3,RPS2,RPS15A,RPS9,RPS7,RPL24,NUP37,RPL12,NUP214,RQCD1,RPL17
ZBTB33	RNA splicing (GO:0008380)	40	165	19770	1797	1.42898e-09	4.71134e-06	MBNL1,HNRNPD,HNRNPC,PCBP1,SRSF7,KIAA1967,LUC7L3,HNRNPA2B1,PCBP2,TARDBP,HNRNPK,SF3A1,HNRNPA0,SMNDC1,HNRNPH3,SRSF2,SMC1A,CDK12,POLR2B,SRSF5,FUS,RBM8A,POLR2A,SNRPG,SNRNP70,DDX23,UPF3B,PDCD7,RNPC3,SRSF4,PPAN,CLP1,SNRPA,ZMAT5,CPSF3,PHF5A,POLR2L,SUGP1,POLR2E,USP39
ZBTB33	viral reproduction (GO:0016032)	62	328	19607	1797	6.28851e-09	2.07269e-05	CTDP1,PSMB2,SUPT16H,LIG4,CUL5,RPL37,RCC1,PSMD5,NMT1,NUP43,POLR2B,SLC25A4,BANF1,RPL15,POLR2A,AP1G1,UBC,RPL23A,B2M,PSMD2,RPL27A,PSMD9,SUPT5H,NUP133,ATP6V1H,RPL4,RPS3A,RPL41,AP2S1,PSMD10,CCNH,RPL10,GTF2A1,RPL23,RPL7A,RPS19,RPL7,POLR2L,RPL26,RPL10A,RPL38,RPL36,RPS15,RPS20,RPS28,RPS11,RPLP1,RPS6,RPL13,RPS12,RPL3,RPS2,RPS15A,RPS9,RPS7,RPL24,CCNT1,NUP37,RPL12,NUP214,POLR2E,RPL17
ZBTB33	REACTOME_MRNA_PROCESSING	38	161	19774	1797	7.72799e-09	2.54637e-05	HNRNPD,HNRNPC,PCBP1,SRSF7,ADARB1,HNRNPA2B1,PCBP2,HNRNPK,SF3A1,HNRNPA0,SRSF2,SMC1A,NUP43,POLR2B,SRSF5,FUS,RBM8A,POLR2A,LSM10,SNRPG,SNRNP70,DDX23,UPF3B,SRSF4,SUPT5H,CLP1,NUP133,SNRPA,CPSF3,PRPF4,PHF5A,CCNH,POLR2L,SUGP1,NUP37,METTL3,NUP214,POLR2E
ZBTB33	regulation of gene silencing (GO:0060968)	8	11	19924	1797	1.79354e-08	5.90791e-05	HIST1H3B,HIST1H3H,HIST1H3G,HIST1H3J,HIST1H3F,HIST1H3C,HIST1H3D,HIST1H3A
ZBTB33	REACTOME_PROCESSING_OF_CAPPED_INTRON_CONTAINING_PRE_MRNA	34	140	19795	1797	1.88679e-08	6.2132e-05	HNRNPD,HNRNPC,PCBP1,SRSF7,HNRNPA2B1,PCBP2,HNRNPK,SF3A1,HNRNPA0,SRSF2,SMC1A,NUP43,POLR2B,SRSF5,FUS,RBM8A,POLR2A,SNRPG,SNRNP70,DDX23,UPF3B,SRSF4,CLP1,NUP133,SNRPA,CPSF3,PRPF4,PHF5A,POLR2L,SUGP1,NUP37,METTL3,NUP214,POLR2E
ZBTB33	REACTOME_TRANSLATION	46	222	19713	1797	2.41172e-08	7.9394e-05	ETF1,SSR1,RPL37,EIF4A1,EIF5,SEC61A1,PABPC1,EIF4A2,RPL15,RPL23A,RPL27A,EIF5B,SSR2,SRP19,RPL4,RPS3A,EEF1G,RPL41,RPL10,RPL23,RPL7A,RPS19,RPL7,RPL26,RPL10A,RPL38,EIF2B4,RPL36,RPS15,RPS20,RPS28,RPS11,RPLP1,RPS6,RPL13,RPS12,RPL3,RPS2,RPS15A,RPS9,RPS7,RPL24,SSR4,RPL12,EEF1B2,RPL17
ZBTB33	REACTOME_MRNA_SPLICING	29	111	19824	1797	2.88479e-08	9.49383e-05	HNRNPD,HNRNPC,PCBP1,SRSF7,HNRNPA2B1,PCBP2,HNRNPK,SF3A1,HNRNPA0,SRSF2,SMC1A,POLR2B,SRSF5,FUS,RBM8A,POLR2A,SNRPG,SNRNP70,DDX23,UPF3B,SRSF4,CLP1,SNRPA,CPSF3,PRPF4,PHF5A,POLR2L,SUGP1,POLR2E
ZBTB33	REACTOME_NONSENSE_MEDIATED_DECAY_ENHANCED_BY_THE_EXON_JUNCTION_COMPLEX	39	176	19759	1797	3.40581e-08	0.000112051	ETF1,RPL37,PABPC1,SMG7,RPL15,RBM8A,RPL23A,RPL27A,UPF3B,SMG5,RPL4,EIF4A3,RPS3A,RPL41,RPL10,RPL23,RPL7A,RPS19,RPL7,RPL26,RPL10A,RPL38,RPL36,RPS15,RPS20,RPS28,RPS11,RPLP1,RPS6,RPL13,RPS12,RPL3,RPS2,RPS15A,RPS9,RPS7,RPL24,RPL12,RPL17
ZBTB33	negative regulation of megakaryocyte differentiation (GO:0045653)	10	18	19917	1797	5.42879e-08	0.000178553	HIST1H4H,HIST1H4J,HIST1H4K,HIST4H4,HIST1H4I,HIST1H4E,HIST1H4A,HIST1H4C,HIST1H4B,HIST1H4D
ZBTB33	CenH3-containing nucleosome assembly at centromere (GO:0034080)	14	37	19898	1797	2.74456e-07	0.000902413	RBBP4,SMARCA5,RBBP7,HIST1H4H,HIST1H4J,HIST1H4K,HIST4H4,HIST1H4I,HIST1H4E,HIST1H4A,HIST1H4C,NPM1,HIST1H4B,HIST1H4D
ZBTB33	REACTOME_INFLUENZA_VIRAL_RNA_TRANSCRIPTION_AND_REPLICATION	36	169	19766	1797	2.99993e-07	0.000986078	RPL37,POLR2B,RPL15,POLR2A,RPL23A,RPL27A,RPL4,RPS3A,RPL41,RPL10,RPL23,RPL7A,RPS19,RPL7,POLR2L,RPL26,RPL10A,RPL38,RPL36,RPS15,RPS20,RPS28,RPS11,RPLP1,RPS6,RPL13,RPS12,RPL3,RPS2,RPS15A,RPS9,RPS7,RPL24,RPL12,POLR2E,RPL17
ZBTB33	REACTOME_SRP_DEPENDENT_COTRANSLATIONAL_PROTEIN_TARGETING_TO_MEMBRANE	37	179	19756	1797	4.77498e-07	0.00156906	SSR1,RPL37,SEC61A1,RPL15,RPL23A,RPL27A,SSR2,SRP19,RPL4,RPS3A,RPL41,RPL10,RPL23,RPL7A,RPS19,RPL7,RPL26,RPL10A,RPL38,RPL36,RPS15,RPS20,RPS28,RPS11,RPLP1,RPS6,RPL13,RPS12,RPL3,RPS2,RPS15A,RPS9,RPS7,RPL24,SSR4,RPL12,RPL17
ZBTB33	REACTOME_INFLUENZA_LIFE_CYCLE	40	203	19732	1797	6.93207e-07	0.00227718	RPL37,NUP43,POLR2B,RPL15,POLR2A,RPL23A,RPL27A,NUP133,RPL4,RPS3A,RPL41,RPL10,RPL23,RPL7A,RPS19,RPL7,POLR2L,RPL26,RPL10A,RPL38,RPL36,RPS15,RPS20,RPS28,RPS11,RPLP1,RPS6,RPL13,RPS12,RPL3,RPS2,RPS15A,RPS9,RPS7,RPL24,NUP37,RPL12,NUP214,POLR2E,RPL17
ZBTB33	cellular protein metabolic process (GO:0044267)	66	404	19531	1797	7.2517e-07	0.00238146	ETF1,SSR1,PIGN,EDEM3,RPL37,EIF4A1,GALNT13,TIMM17A,EIF5,CCT6A,PABPC1,EIF4A2,RPL15,PIGW,DHPS,HSPA9,RPL23A,RPL27A,CCT8,CCT5,EIF5B,PFDN6,SSR2,SRP19,TIMM50,RPL4,RPS3A,GMPPA,EEF1G,ACTB,B3GNT6,TIMM22,RPL41,RPL10,CHCHD4,TIMM13,PIGP,RPL23,RPL7A,RPS19,RPL7,RPL26,RPL10A,RPL38,EIF2B4,RPL36,RPS15,RPS20,RPS28,RPS11,RPLP1,RPS6,RPL13,RPS12,RPL3,RPS2,RPS15A,RPS9,RPS7,RPL24,SSR4,PIGB,RPL12,TBCD,EEF1B2,RPL17
ZBTB33	REACTOME_CELL_CYCLE_MITOTIC	56	325	19610	1797	7.8281e-07	0.00256997	TAOK1,PSMB2,RBBP4,NUMA1,CEP57,CKS1B,TFDP1,CLASP1,STAG1,AHCTF1,CDK6,PCM1,PSMD5,ANAPC1,SMC1A,ZWILCH,NUP43,CENPC1,RFC5,PPP1CC,TK2,RBL2,RPA2,CDC7,GINS4,PSMD2,DCTN2,OFD1,CDC26,TUBGCP5,PSMD9,ANAPC4,MCM4,NUP133,PMF1,MAD2L1,CEP76,RFC3,CETN2,ANAPC5,PSMD10,CCNH,BUB1B,POLA2,CCDC99,CDC20,ZW10,TUBGCP6,NUP37,LIN37,SPC25,NUF2,KNTC1,CENPT,MAD1L1,CEP72
ZBTB33	mitotic cell cycle (GO:0000278)	58	344	19591	1797	1.07925e-06	0.0035421	TAOK1,PSMB2,RBBP4,NUMA1,CEP57,CKS1B,TFDP1,CLASP1,STAG1,AHCTF1,CDK6,PCM1,PSMD5,ANAPC1,RFC1,SMC1A,ZWILCH,NUP43,CENPC1,RFC5,PPP1CC,RBL2,RPA2,UBC,CDC7,GINS4,PSMD2,DCTN2,OFD1,CDC26,SFI1,TUBGCP5,PSMD9,ANAPC4,MCM4,NUP133,PMF1,MAD2L1,CEP76,RFC3,CETN2,ANAPC5,PSMD10,CCNH,BUB1B,POLA2,CDC20,ZW10,KIF18B,TUBGCP6,NUP37,LIN37,SPC25,NUF2,KNTC1,CENPT,MAD1L1,CEP72
ZBTB33	rRNA processing (GO:0006364)	12	32	19903	1797	1.67639e-06	0.00550024	DIS3,NOP58,EXOSC3,SBDS,NOP14,RPS19,RPL7,RPL26,RPS15,RPS28,RPS6,RPS7
ZBTB33	REACTOME_MITOTIC_PROMETAPHASE	22	87	19848	1797	1.76393e-06	0.00578568	TAOK1,CLASP1,STAG1,AHCTF1,SMC1A,ZWILCH,NUP43,CENPC1,PPP1CC,NUP133,PMF1,MAD2L1,BUB1B,CCDC99,CDC20,ZW10,NUP37,SPC25,NUF2,KNTC1,CENPT,MAD1L1
ZBTB33	REACTOME_PEPTIDE_CHAIN_ELONGATION	32	153	19782	1797	1.82837e-06	0.00599521	RPL37,RPL15,RPL23A,RPL27A,RPL4,RPS3A,RPL41,RPL10,RPL23,RPL7A,RPS19,RPL7,RPL26,RPL10A,RPL38,RPL36,RPS15,RPS20,RPS28,RPS11,RPLP1,RPS6,RPL13,RPS12,RPL3,RPS2,RPS15A,RPS9,RPS7,RPL24,RPL12,RPL17
ZBTB33	REACTOME_3_UTR_MEDIATED_TRANSLATIONAL_REGULATION	35	176	19759	1797	2.37893e-06	0.00779812	RPL37,EIF4A1,PABPC1,EIF4A2,RPL15,RPL23A,RPL27A,RPL4,RPS3A,RPL41,RPL10,RPL23,RPL7A,RPS19,RPL7,RPL26,RPL10A,RPL38,RPL36,RPS15,RPS20,RPS28,RPS11,RPLP1,RPS6,RPL13,RPS12,RPL3,RPS2,RPS15A,RPS9,RPS7,RPL24,RPL12,RPL17
ZBTB33	telomere maintenance (GO:0000723)	17	59	19876	1797	2.51111e-06	0.00822892	PTGES3,RFC1,RFC5,RPA2,DCLRE1B,HIST1H4H,HIST1H4J,HIST1H4K,HIST4H4,HIST1H4I,HIST1H4E,HIST1H4A,HIST1H4C,RFC3,HIST1H4B,HIST1H4D,POLA2
ZBTB33	mitotic prometaphase (GO:0000236)	21	85	19850	1797	4.30107e-06	0.0140903	TAOK1,CLASP1,STAG1,AHCTF1,SMC1A,ZWILCH,NUP43,CENPC1,PPP1CC,NUP133,PMF1,MAD2L1,BUB1B,CDC20,ZW10,NUP37,SPC25,NUF2,KNTC1,CENPT,MAD1L1
ZBTB33	REACTOME_METABOLISM_OF_PROTEINS	77	518	19417	1797	4.44247e-06	0.0145491	ETF1,SSR1,PIGN,XRN2,EDEM3,RPL37,EIF4A1,GALNT13,TIMM17A,EIF5,SEC61A1,CCT6A,LONP2,SLC25A4,PABPC1,FXC1,EIF4A2,RPL15,PIGW,COQ2,DHPS,HSPA9,RPL23A,RPL27A,CCT8,CCT5,EIF5B,ACO2,PFDN6,SSR2,SRP19,ATP5G1,TIMM50,RPL4,RPS3A,GMPPA,EEF1G,ACTB,B3GNT6,TIMM22,RPL41,CYC1,RPL10,HSPD1,CHCHD4,TIMM13,PIGP,RPL23,RPL7A,RPS19,RPL7,RPL26,RPL10A,RPL38,EIF2B4,RPL36,RPS15,RPS20,RPS28,RPS11,RPLP1,RPS6,RPL13,RPS12,RPL3,RPS2,RPS…
ZBTB33	nucleosome assembly (GO:0006334)	14	45	19890	1797	5.0494e-06	0.0165317	RBBP4,SMARCA5,RBBP7,HIST1H4H,HIST1H4J,HIST1H4K,HIST4H4,HIST1H4I,HIST1H4E,HIST1H4A,HIST1H4C,NPM1,HIST1H4B,HIST1H4D
ZBTB33	REACTOME_ACTIVATED_TAK1_MEDIATES_P38_MAPK_ACTIVATION	8	18	19917	1797	8.81722e-06	0.0288588	TAB2,MAPKAPK2,TAB3,IRAK2,NOD1,MAPK14,MAP3K7,IKBKG
ZBTB33	RNA processing (GO:0006396)	13	44	19891	1797	1.90498e-05	0.0623309	RBMS1,HNRNPD,HNRPDL,ADARB1,XRN2,HNRNPK,PABPC4,HNRNPH3,DDX20,RBM39,DDX41,PRPF4,TFIP11
ZBTB33	M phase of mitotic cell cycle (GO:0000087)	21	93	19842	1797	2.03652e-05	0.0666146	TAOK1,CLASP1,STAG1,AHCTF1,SMC1A,ZWILCH,NUP43,CENPC1,PPP1CC,NUP133,PMF1,MAD2L1,BUB1B,CDC20,ZW10,NUP37,SPC25,NUF2,KNTC1,CENPT,MAD1L1
ZBTB33	mitotic cell cycle checkpoint (GO:0007093)	6	12	19923	1797	2.51981e-05	0.0823979	ZWILCH,MAD2L1,MAD2L1BP,BUB1B,ZW10,KNTC1
ZBTB33	ribosomal small subunit biogenesis (GO:0042274)	6	12	19923	1797	2.51981e-05	0.0823979	NOP14,RPS19,RPS15,RPS28,RPS6,RPS7
ZBTB33	cholesterol biosynthetic process (GO:0006695)	8	20	19915	1797	2.57768e-05	0.0842386	GGPS1,HMGCS1,CYP51A1,PMVK,FDPS,G6PD,IDI1,NSDHL
