# Supplementary material for: Investigating the functional implications of reinforcing feedback loops in transcriptional regulatory networks
Source: Royal Society of Chemistry journal article supplement (doi:10.1039/c4mb00526k), 2014-09-17
Supplement: c4mb00526k5.xlsx [file c4mb00526k5.xlsx]

## Sheet: Sheet1
rFBL_ID	regX	regY	x	y	xy	total	deplet.pval	enrich.pval	deplet.FDR	enrich.FDR
1	BCLAF1	hsa-miR-19a	1999	1156	136	19935	0.979337	0.0206635	1	0.47526
1	hsa-miR-19a	hsa-miR-9	1156	1218	243	19935	1	6.27604e-71	1	3.3263e-69
1	hsa-miR-19a	SUZ12	1156	621	48	19935	0.982184	0.0178164	1	0.463227
1	BCLAF1	hsa-miR-9	1999	1218	123	19935	0.55787	0.44213	1	1
1	BCLAF1	SUZ12	1999	621	15	19935	5.53636e-14	1	2.98963e-12	1
1	hsa-miR-9	SUZ12	1218	621	60	19935	0.99983	0.000169851	1	0.0062845
2	BRF2	hsa-miR-19a	36	1156	0	19935	0.116192	0.883808	1	1
2	hsa-miR-129-3p	hsa-miR-19a	436	1156	89	19935	1	1.16493e-26	1	5.59164e-25
2	hsa-miR-19a	SUZ12	1156	621	48	19935	0.982184	0.0178164	1	0.463227
2	BRF2	hsa-miR-129-3p	36	436	0	19935	0.450767	0.549233	1	1
2	BRF2	SUZ12	36	621	2	19935	0.899119	0.100881	1	1
2	hsa-miR-129-3p	SUZ12	436	621	14	19935	0.615902	0.384098	1	1
3	hsa-miR-19a	SMARCA4	1156	101	4	19935	0.296238	0.703762	1	1
3	hsa-miR-155	hsa-miR-19a	437	1156	101	19935	1	6.7689e-35	1	3.45214e-33
3	hsa-miR-19a	MEF2C	1156	975	86	19935	0.999962	3.83718e-05	1	0.00161161
3	hsa-miR-155	SMARCA4	437	101	0	19935	0.105994	0.894006	1	1
3	MEF2C	SMARCA4	975	101	13	19935	0.999604	0.000395821	1	0.0134579
3	hsa-miR-155	MEF2C	437	975	38	19935	0.999774	0.000226147	1	0.00814129
4	hsa-miR-19a	SUZ12	1156	621	48	19935	0.982184	0.0178164	1	0.463227
4	hsa-miR-129-5p	hsa-miR-19a	540	1156	119	19935	1	1.0233e-38	1	5.32117e-37
4	hsa-miR-19a	ZBTB33	1156	1816	103	19935	0.429356	0.570644	1	1
4	hsa-miR-129-5p	SUZ12	540	621	28	19935	0.996691	0.00330949	1	0.0992847
4	SUZ12	ZBTB33	621	1816	22	19935	3.3364e-08	1	1.76829e-06	1
4	hsa-miR-129-5p	ZBTB33	540	1816	58	19935	0.918358	0.0816419	1	1
9	BCL11A	hsa-miR-92a	2136	887	129	19935	0.999879	0.000120786	1	0.00458985
9	hsa-miR-155	hsa-miR-92a	437	887	76	19935	1	1.23994e-25	1	5.82773e-24
9	hsa-miR-92a	SMARCA4	887	101	4	19935	0.530901	0.469099	1	1
9	BCL11A	hsa-miR-155	2136	437	67	19935	0.99896	0.00103989	1	0.0343164
9	BCL11A	SMARCA4	2136	101	18	19935	0.989681	0.0103193	1	0.29926
9	hsa-miR-155	SMARCA4	437	101	0	19935	0.105994	0.894006	1	1
10	BCL11A	hsa-miR-155	2136	437	67	19935	0.99896	0.00103989	1	0.0343164
10	hsa-miR-130b	hsa-miR-155	884	437	78	19935	1	3.86754e-27	1	1.93377e-25
10	hsa-miR-155	SMARCA4	437	101	0	19935	0.105994	0.894006	1	1
10	BCL11A	hsa-miR-130b	2136	884	129	19935	0.999896	0.000103945	1	0.00415781
10	BCL11A	SMARCA4	2136	101	18	19935	0.989681	0.0103193	1	0.29926
10	hsa-miR-130b	SMARCA4	884	101	5	19935	0.708875	0.291125	1	1
11	BCL11A	hsa-miR-155	2136	437	67	19935	0.99896	0.00103989	1	0.0343164
11	hsa-miR-155	hsa-miR-301b	437	884	78	19935	1	3.86754e-27	1	1.93377e-25
11	hsa-miR-155	SMARCA4	437	101	0	19935	0.105994	0.894006	1	1
11	BCL11A	hsa-miR-301b	2136	884	129	19935	0.999896	0.000103945	1	0.00415781
11	BCL11A	SMARCA4	2136	101	18	19935	0.989681	0.0103193	1	0.29926
11	hsa-miR-301b	SMARCA4	884	101	5	19935	0.708875	0.291125	1	1
12	BCLAF1	hsa-miR-155	1999	437	54	19935	0.953941	0.046059	1	0.921179
12	hsa-miR-1248	hsa-miR-155	266	437	29	19935	1	2.10494e-13	1	9.68274e-12
12	hsa-miR-155	SMARCA4	437	101	0	19935	0.105994	0.894006	1	1
12	BCLAF1	hsa-miR-1248	1999	266	36	19935	0.97442	0.0255804	1	0.55147
12	BCLAF1	SMARCA4	1999	101	33	19935	1	8.78278e-11	1	3.95225e-09
12	hsa-miR-1248	SMARCA4	266	101	2	19935	0.847438	0.152562	1	1
13	FOS	hsa-miR-155	5166	437	151	19935	0.99998	2.03857e-05	1	0.000876587
13	hsa-miR-155	hsa-miR-216b	437	284	22	19935	1	8.36451e-08	1	3.68039e-06
13	hsa-miR-155	RXRA	437	4990	140	19935	0.999649	0.000350795	1	0.0122778
13	FOS	hsa-miR-216b	5166	284	102	19935	0.999932	6.78646e-05	1	0.00278245
13	FOS	RXRA	5166	4990	1916	19935	1	5.22764e-114	1	2.82293e-112
13	hsa-miR-216b	RXRA	284	4990	85	19935	0.974933	0.0250668	1	0.55147
